# Supplementary material
Source: publisher figshare collection journal article supplement (https://tandf.figshare.com/articles/dataset/_/8248073)

## **Table of Contents: Bridge Centrality in 18 Psychometric Networks**

### **1. Table of Contents**

#### **Pages 2-19: Bridge Centrality Estimates**

2. Borsboom & Cramer (2013), GAD & Depression, Association Network
3. Borsboom & Cramer (2013), GAD & Depression, DAG
4. Robinaugh, LeBlanc, Vuletich, & McNally (2014), PCBD & Depression, Wave 1
5. Robinaugh, LeBlanc, Vuletich, & McNally (2014), PCBD & Depression, Wave 2
6. Robinaugh, LeBlanc, Vuletich, & McNally (2014), PCBD & Depression, Wave 3
7. Ruzzano, Borsboom, & Geurts (2014), Autism & OCD, Association Network
8. Ruzzano, Borsboom, & Geurts (2014), Autism & OCD, DAG
9. Boschloo, van Borkulo, Rhemtulla, Keyes, Borsboom, & Schoevers (2015), Multiple disorders & problems, eLASSO
10. Beard et al. (2016), GAD & Depression, GLASSO
11. Boschloo, Schoevers, van Borkulo, Borsboom, & Oldenhinkel (2016), Multiple disorders & problems, eLASSO
12. McNally, Mair, Mugno, & Riemann (2016), OCD & Depression, GLASSO
13. McNally, Mair, Mugno, & Riemann (2016), OCD & Depression, DAG
14. Levinson et al. (2017), Bulimia nervosa & Anxiety, GLASSO
15. Levinson et al. (2017), Bulimia nervosa & Depression, GLASSO
16. Levinson et al. (2017), Bulimia nervosa, Anxiety, & Depression, GLASSO
17. Jones, Mair, Riemann, Mugno, & McNally (2018), OCD & Depression, Association
18. Jones, Mair, Riemann, Mugno, & McNally (2018), OCD & Depression, Association
19. Jones, Mair, Riemann, Mugno, & McNally (2018), OCD & Depression, Association

#### **Pages 20-37: Networks with bridges colored**

20. Borsboom & Cramer (2013), GAD & Depression, Association Network
21. Borsboom & Cramer (2013), GAD & Depression, DAG
22. Robinaugh, LeBlanc, Vuletich, & McNally (2014), PCBD & Depression, Wave 1
23. Robinaugh, LeBlanc, Vuletich, & McNally (2014), PCBD & Depression, Wave 2
24. Robinaugh, LeBlanc, Vuletich, & McNally (2014), PCBD & Depression, Wave 3
25. Ruzzano, Borsboom, & Geurts (2014), Autism & OCD, Association Network
26. Ruzzano, Borsboom, & Geurts (2014), Autism & OCD, DAG
27. Boschloo, van Borkulo, Rhemtulla, Keyes, Borsboom, & Schoevers (2015), Multiple disorders & problems, eLASSO
28. Beard et al. (2016), GAD & Depression, GLASSO
29. Boschloo, Schoevers, van Borkulo, Borsboom, & Oldenhinkel (2016), Multiple disorders & problems, eLASSO
30. McNally, Mair, Mugno, & Riemann (2016), OCD & Depression, GLASSO
31. McNally, Mair, Mugno, & Riemann (2016), OCD & Depression, DAG
32. Levinson et al. (2017), Bulimia nervosa & Anxiety, GLASSO
33. Levinson et al. (2017), Bulimia nervosa & Depression, GLASSO
34. Levinson et al. (2017), Bulimia nervosa, Anxiety, & Depression, GLASSO
35. Jones, Mair, Riemann, Mugno, & McNally (2018), OCD & Depression, Association
36. Jones, Mair, Riemann, Mugno, & McNally (2018), OCD & Depression, Association
37. Jones, Mair, Riemann, Mugno, & McNally (2018), OCD & Depression, Association

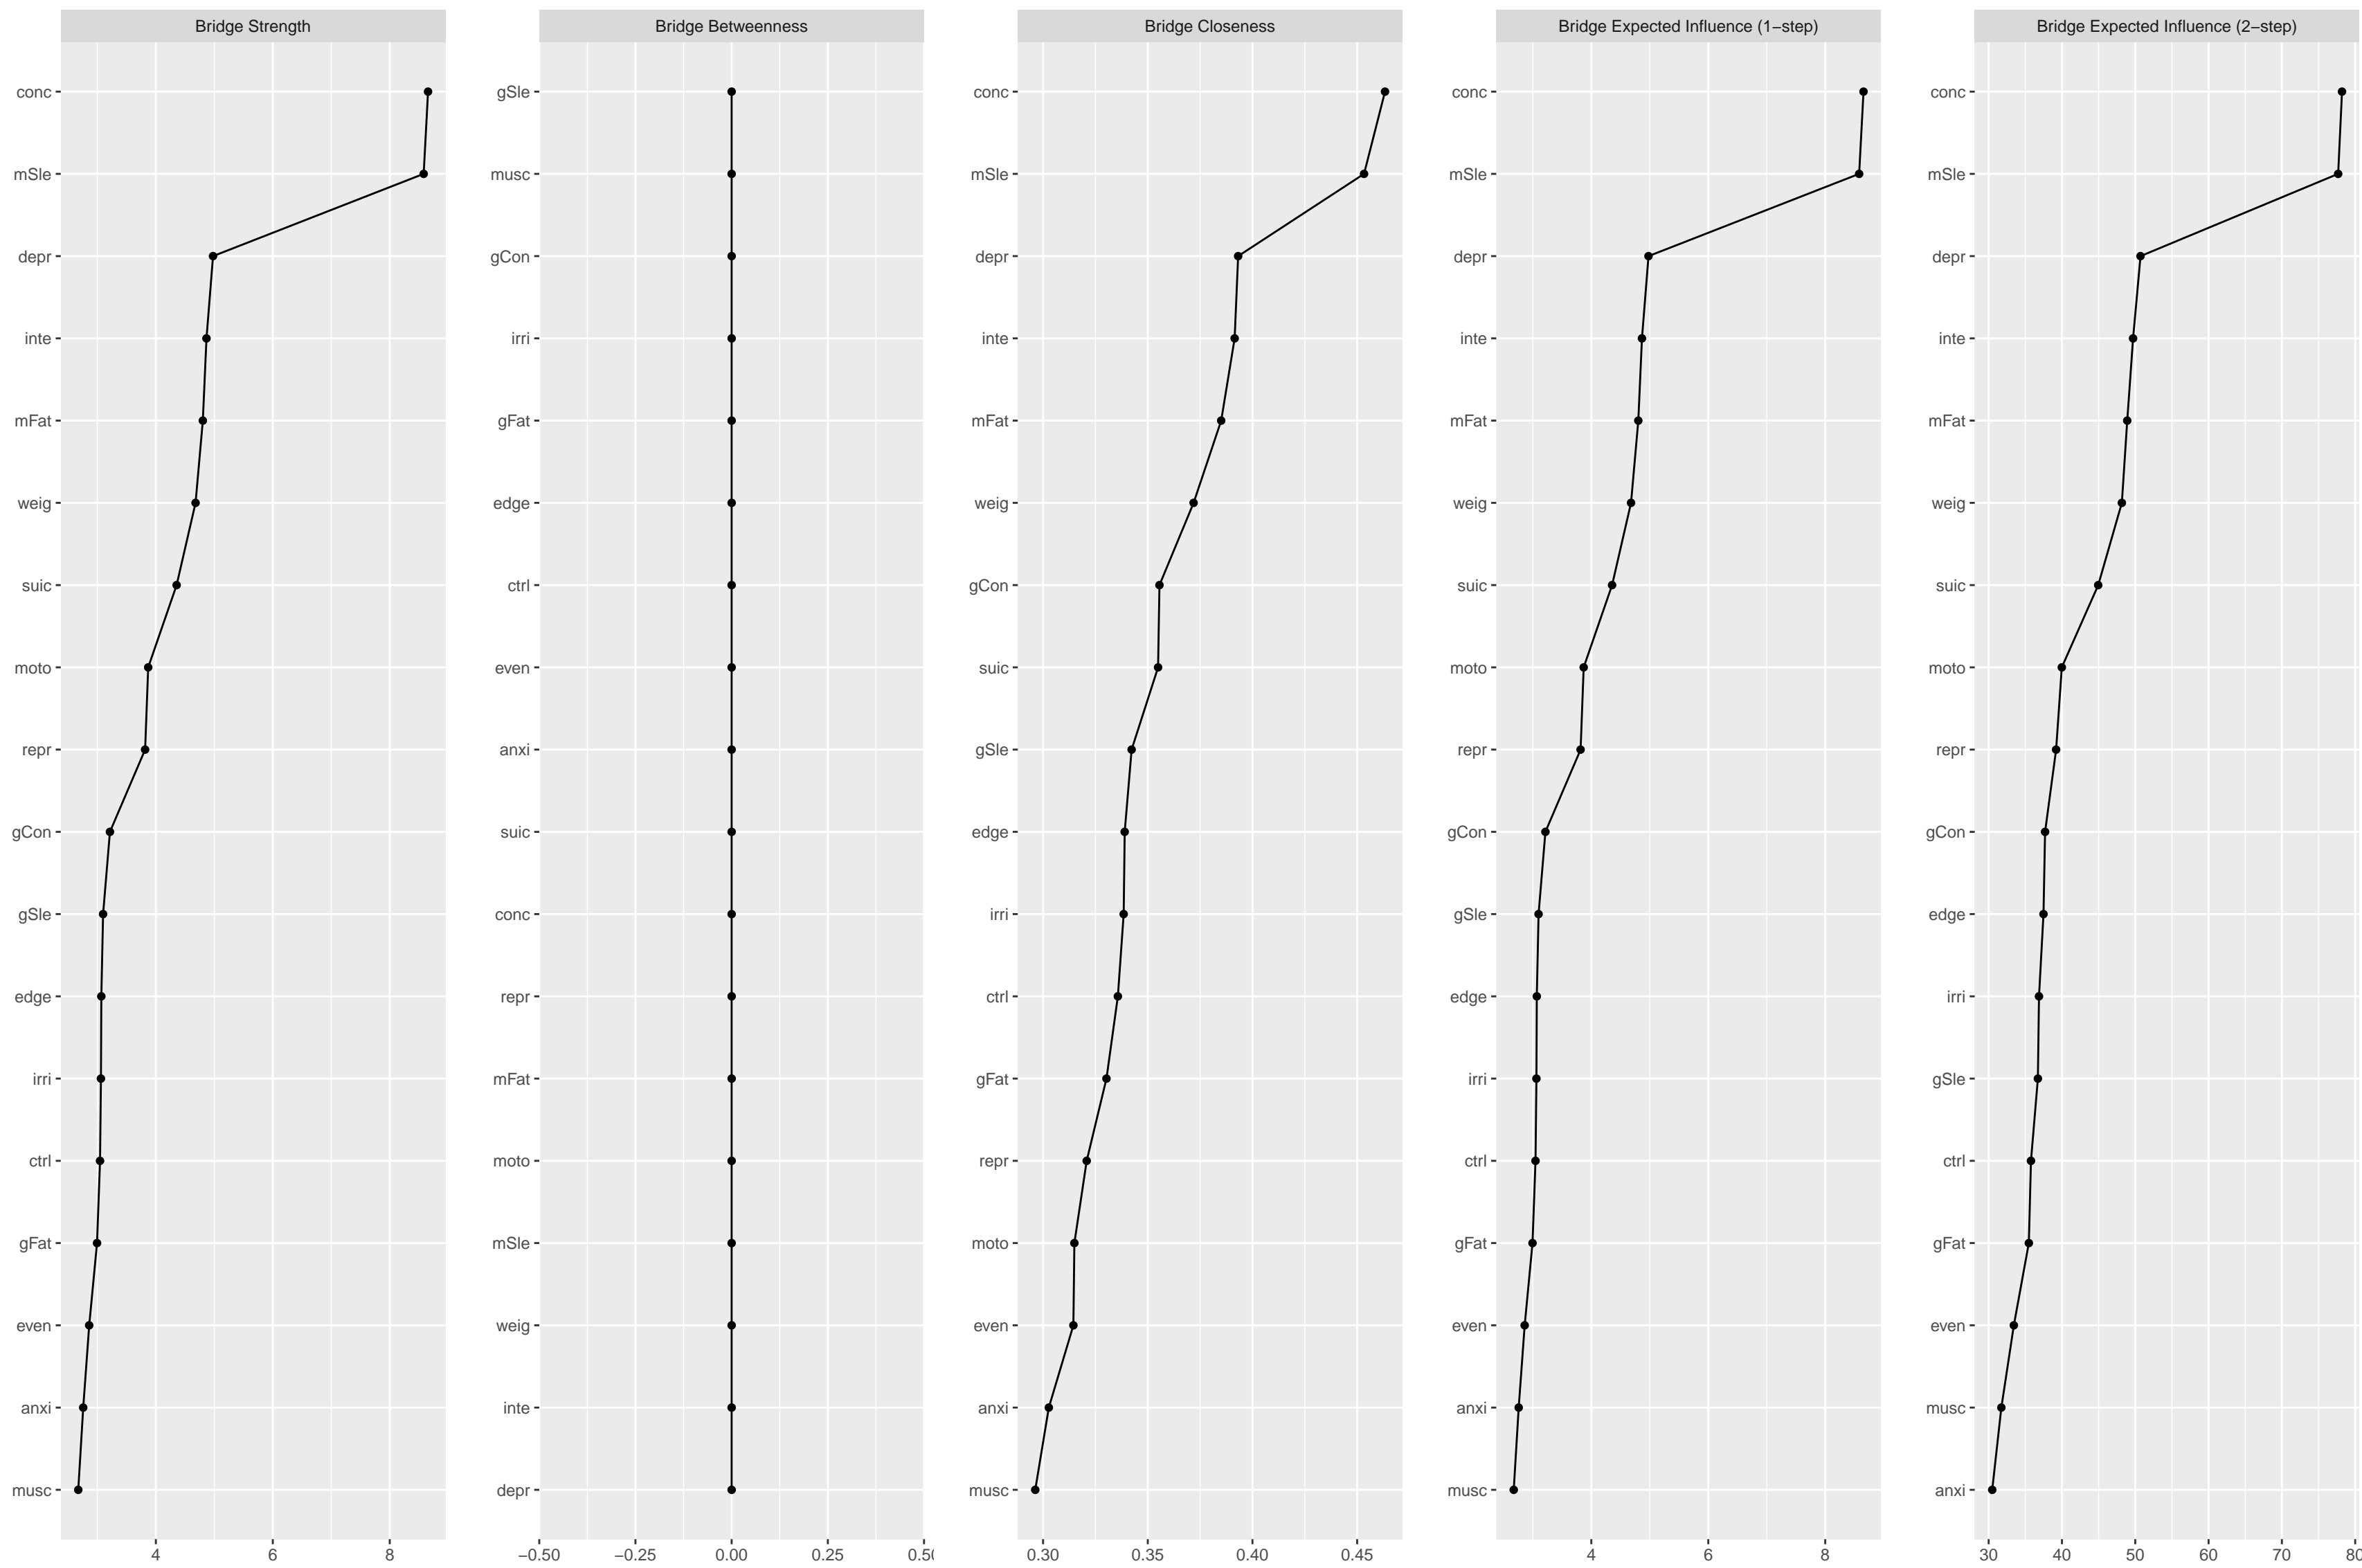

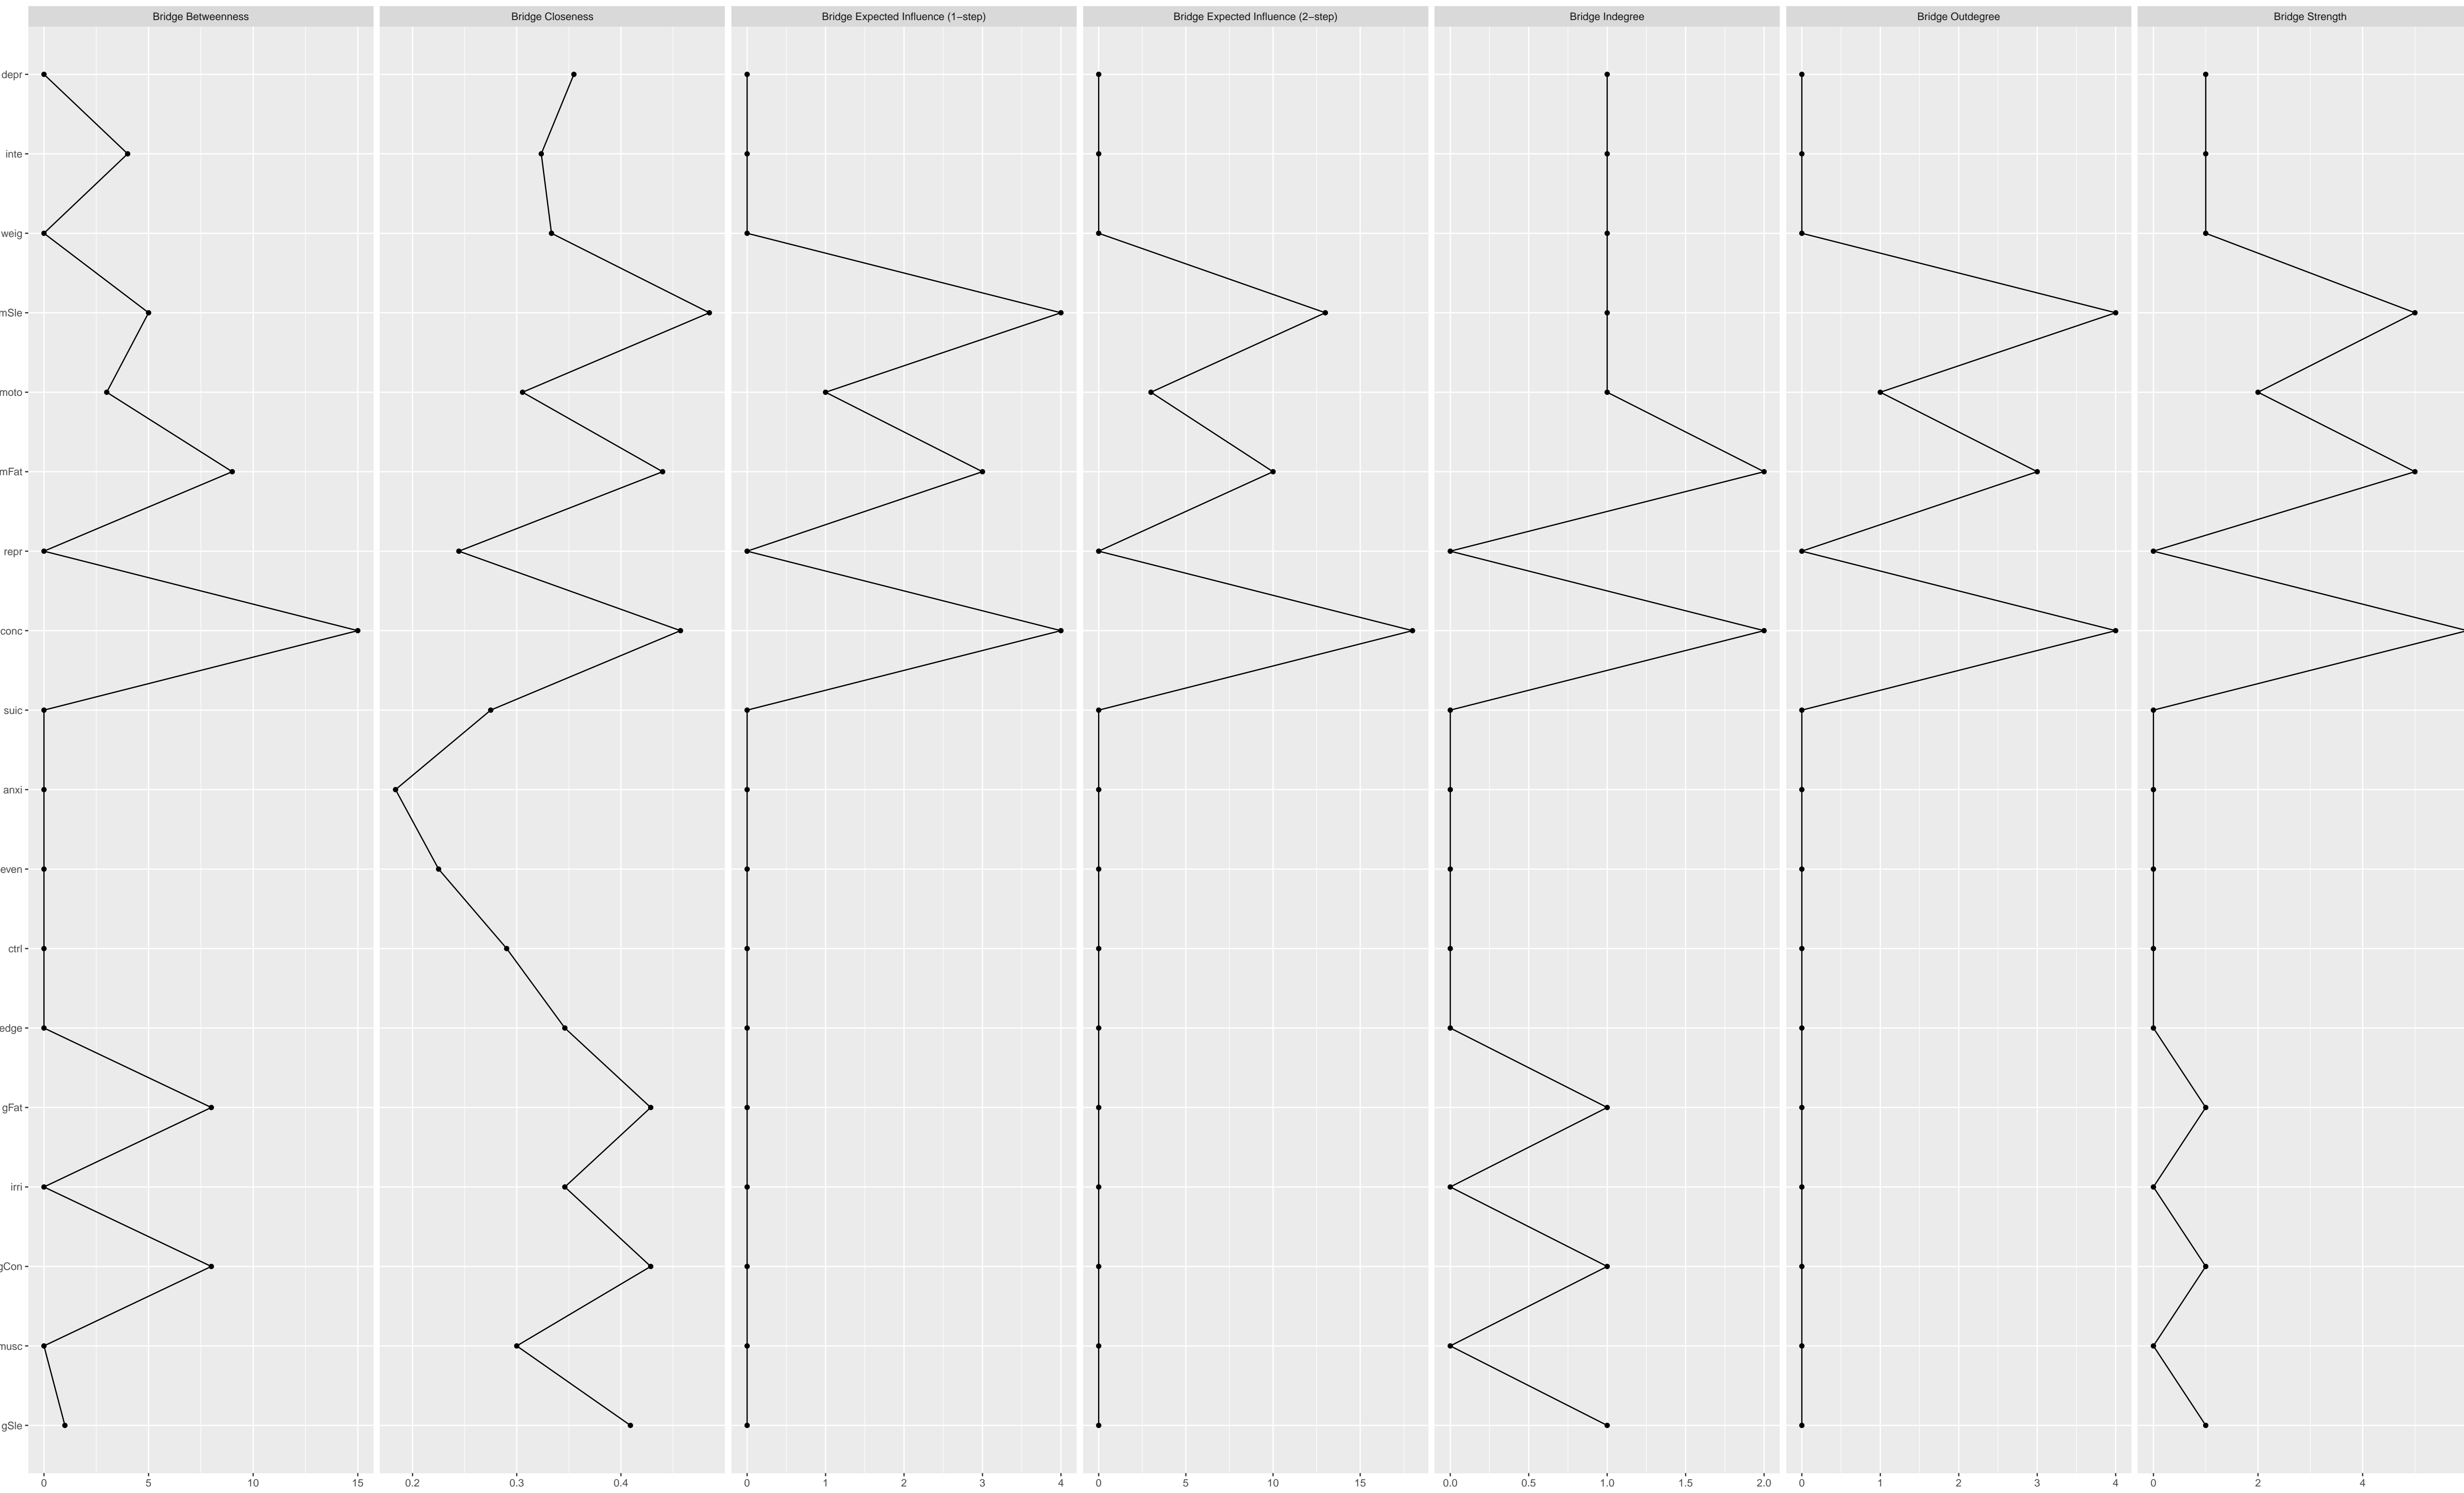

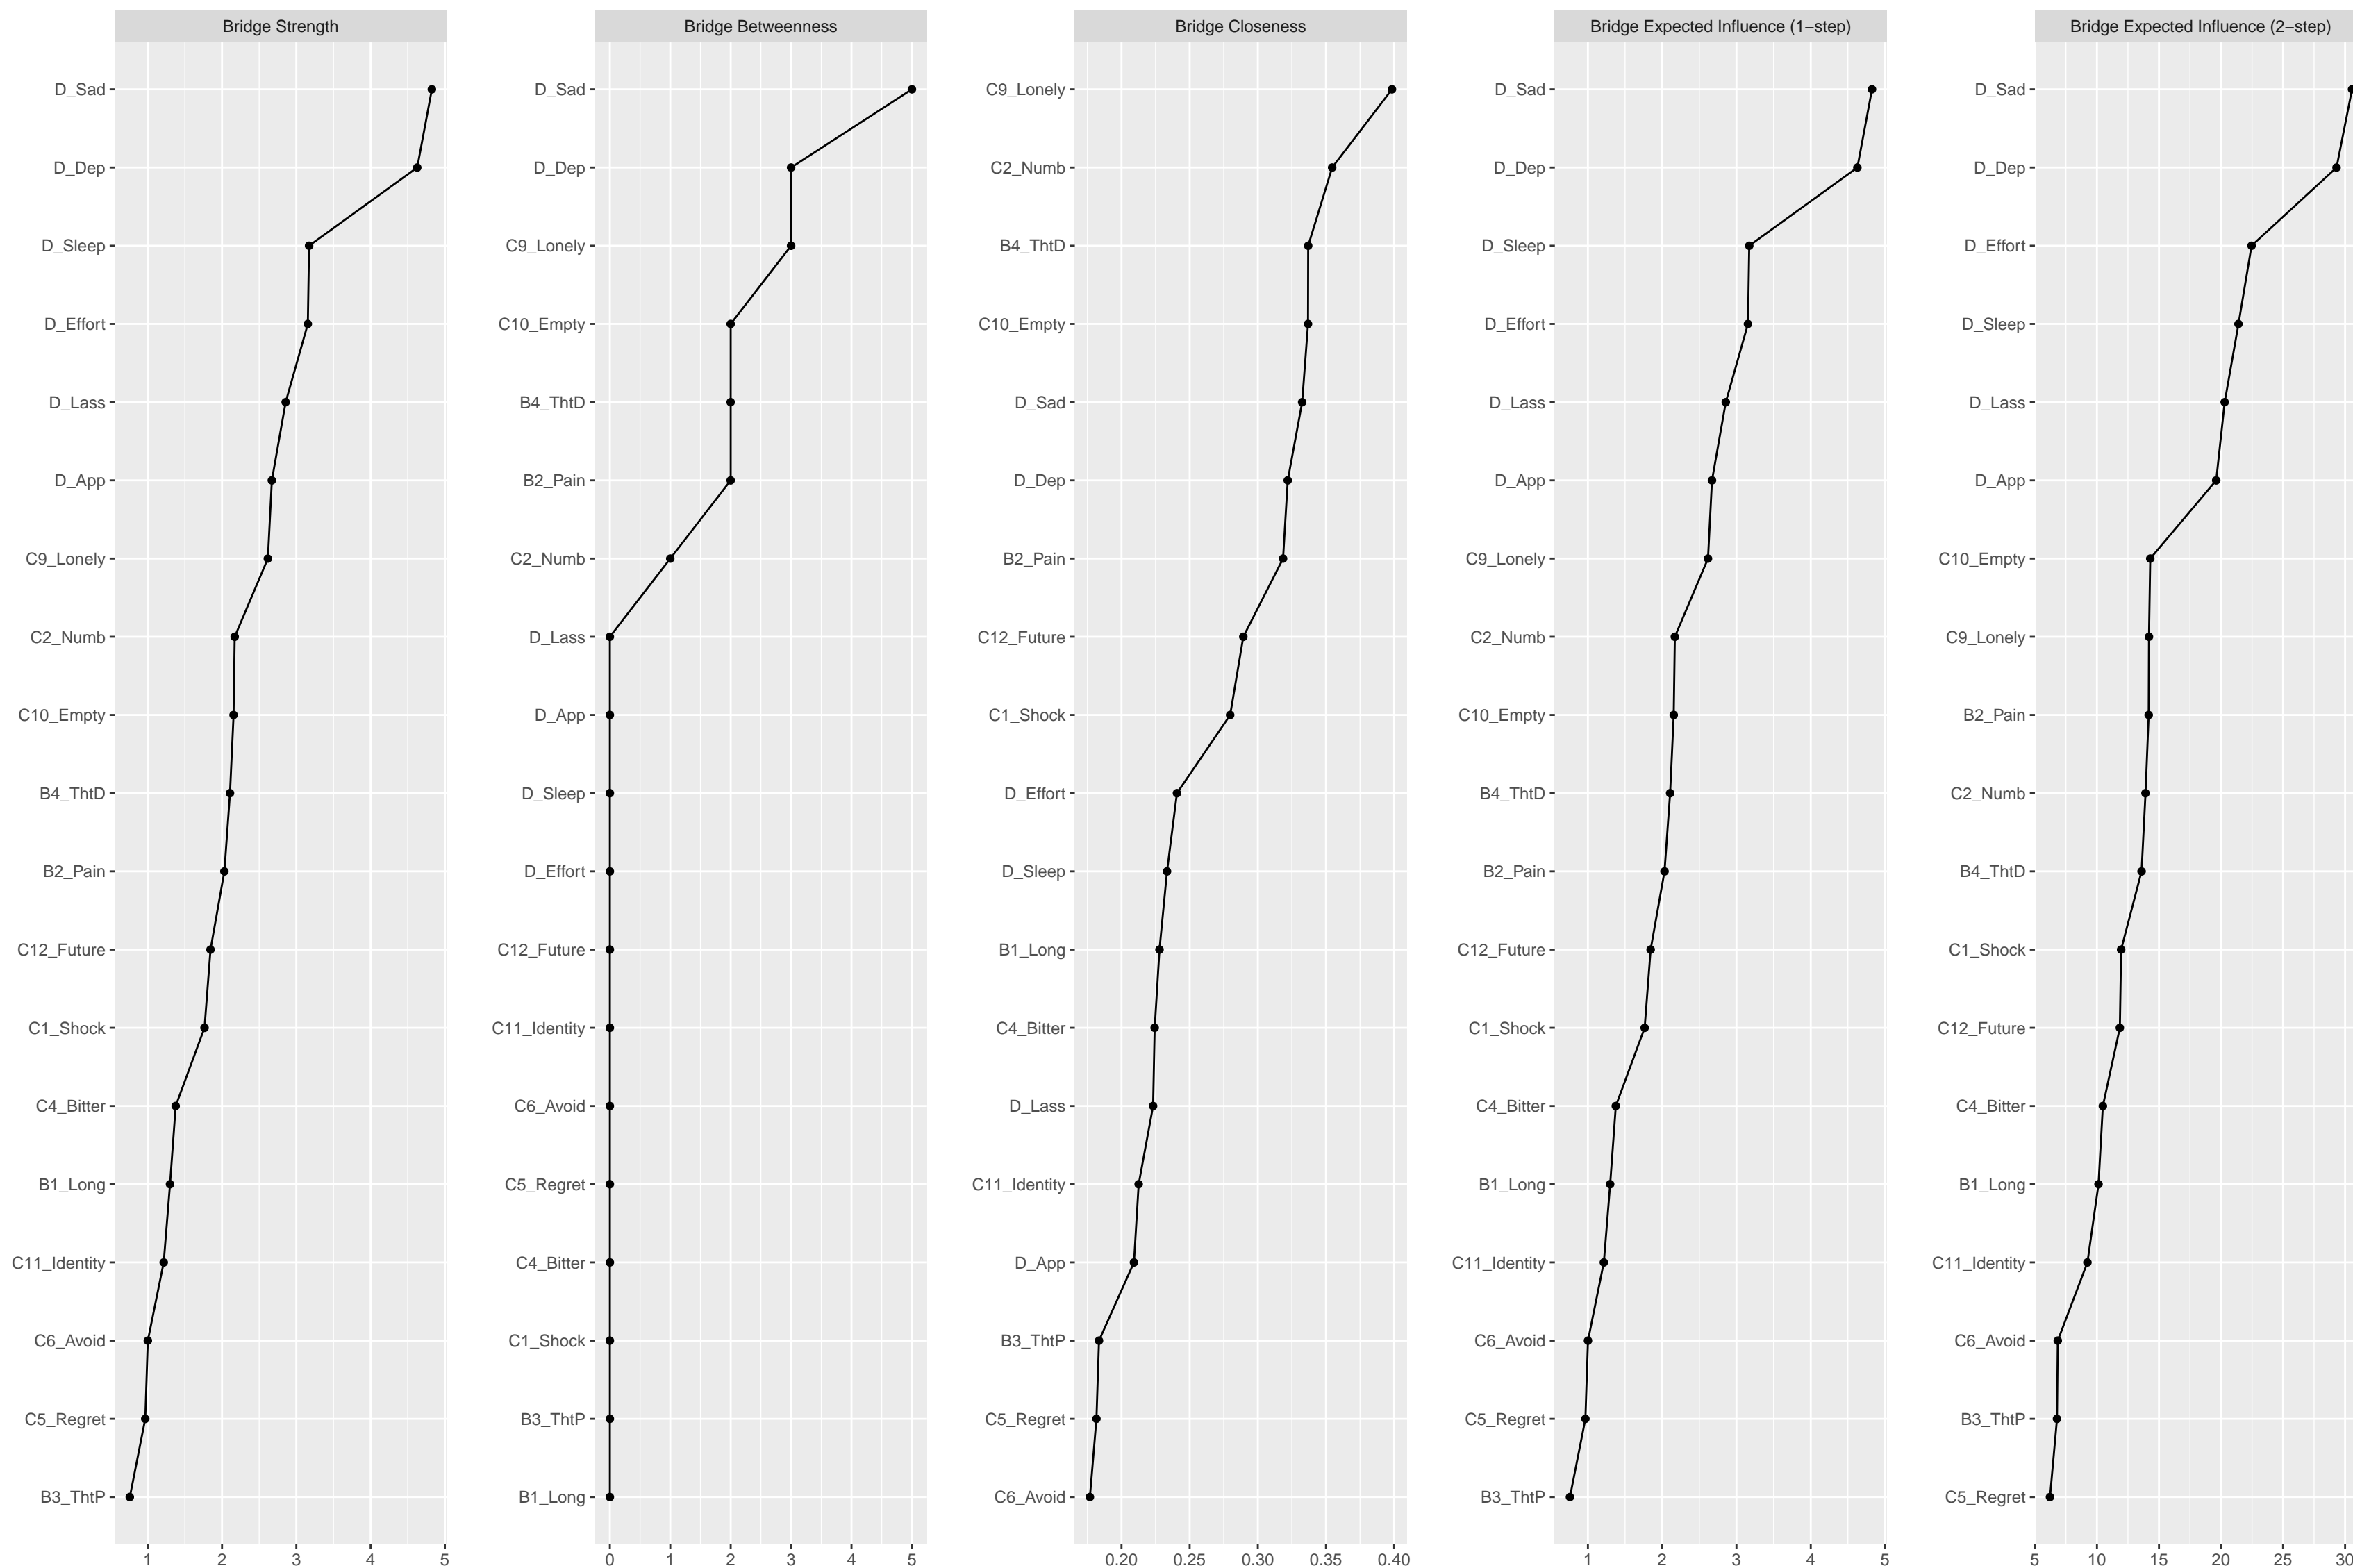

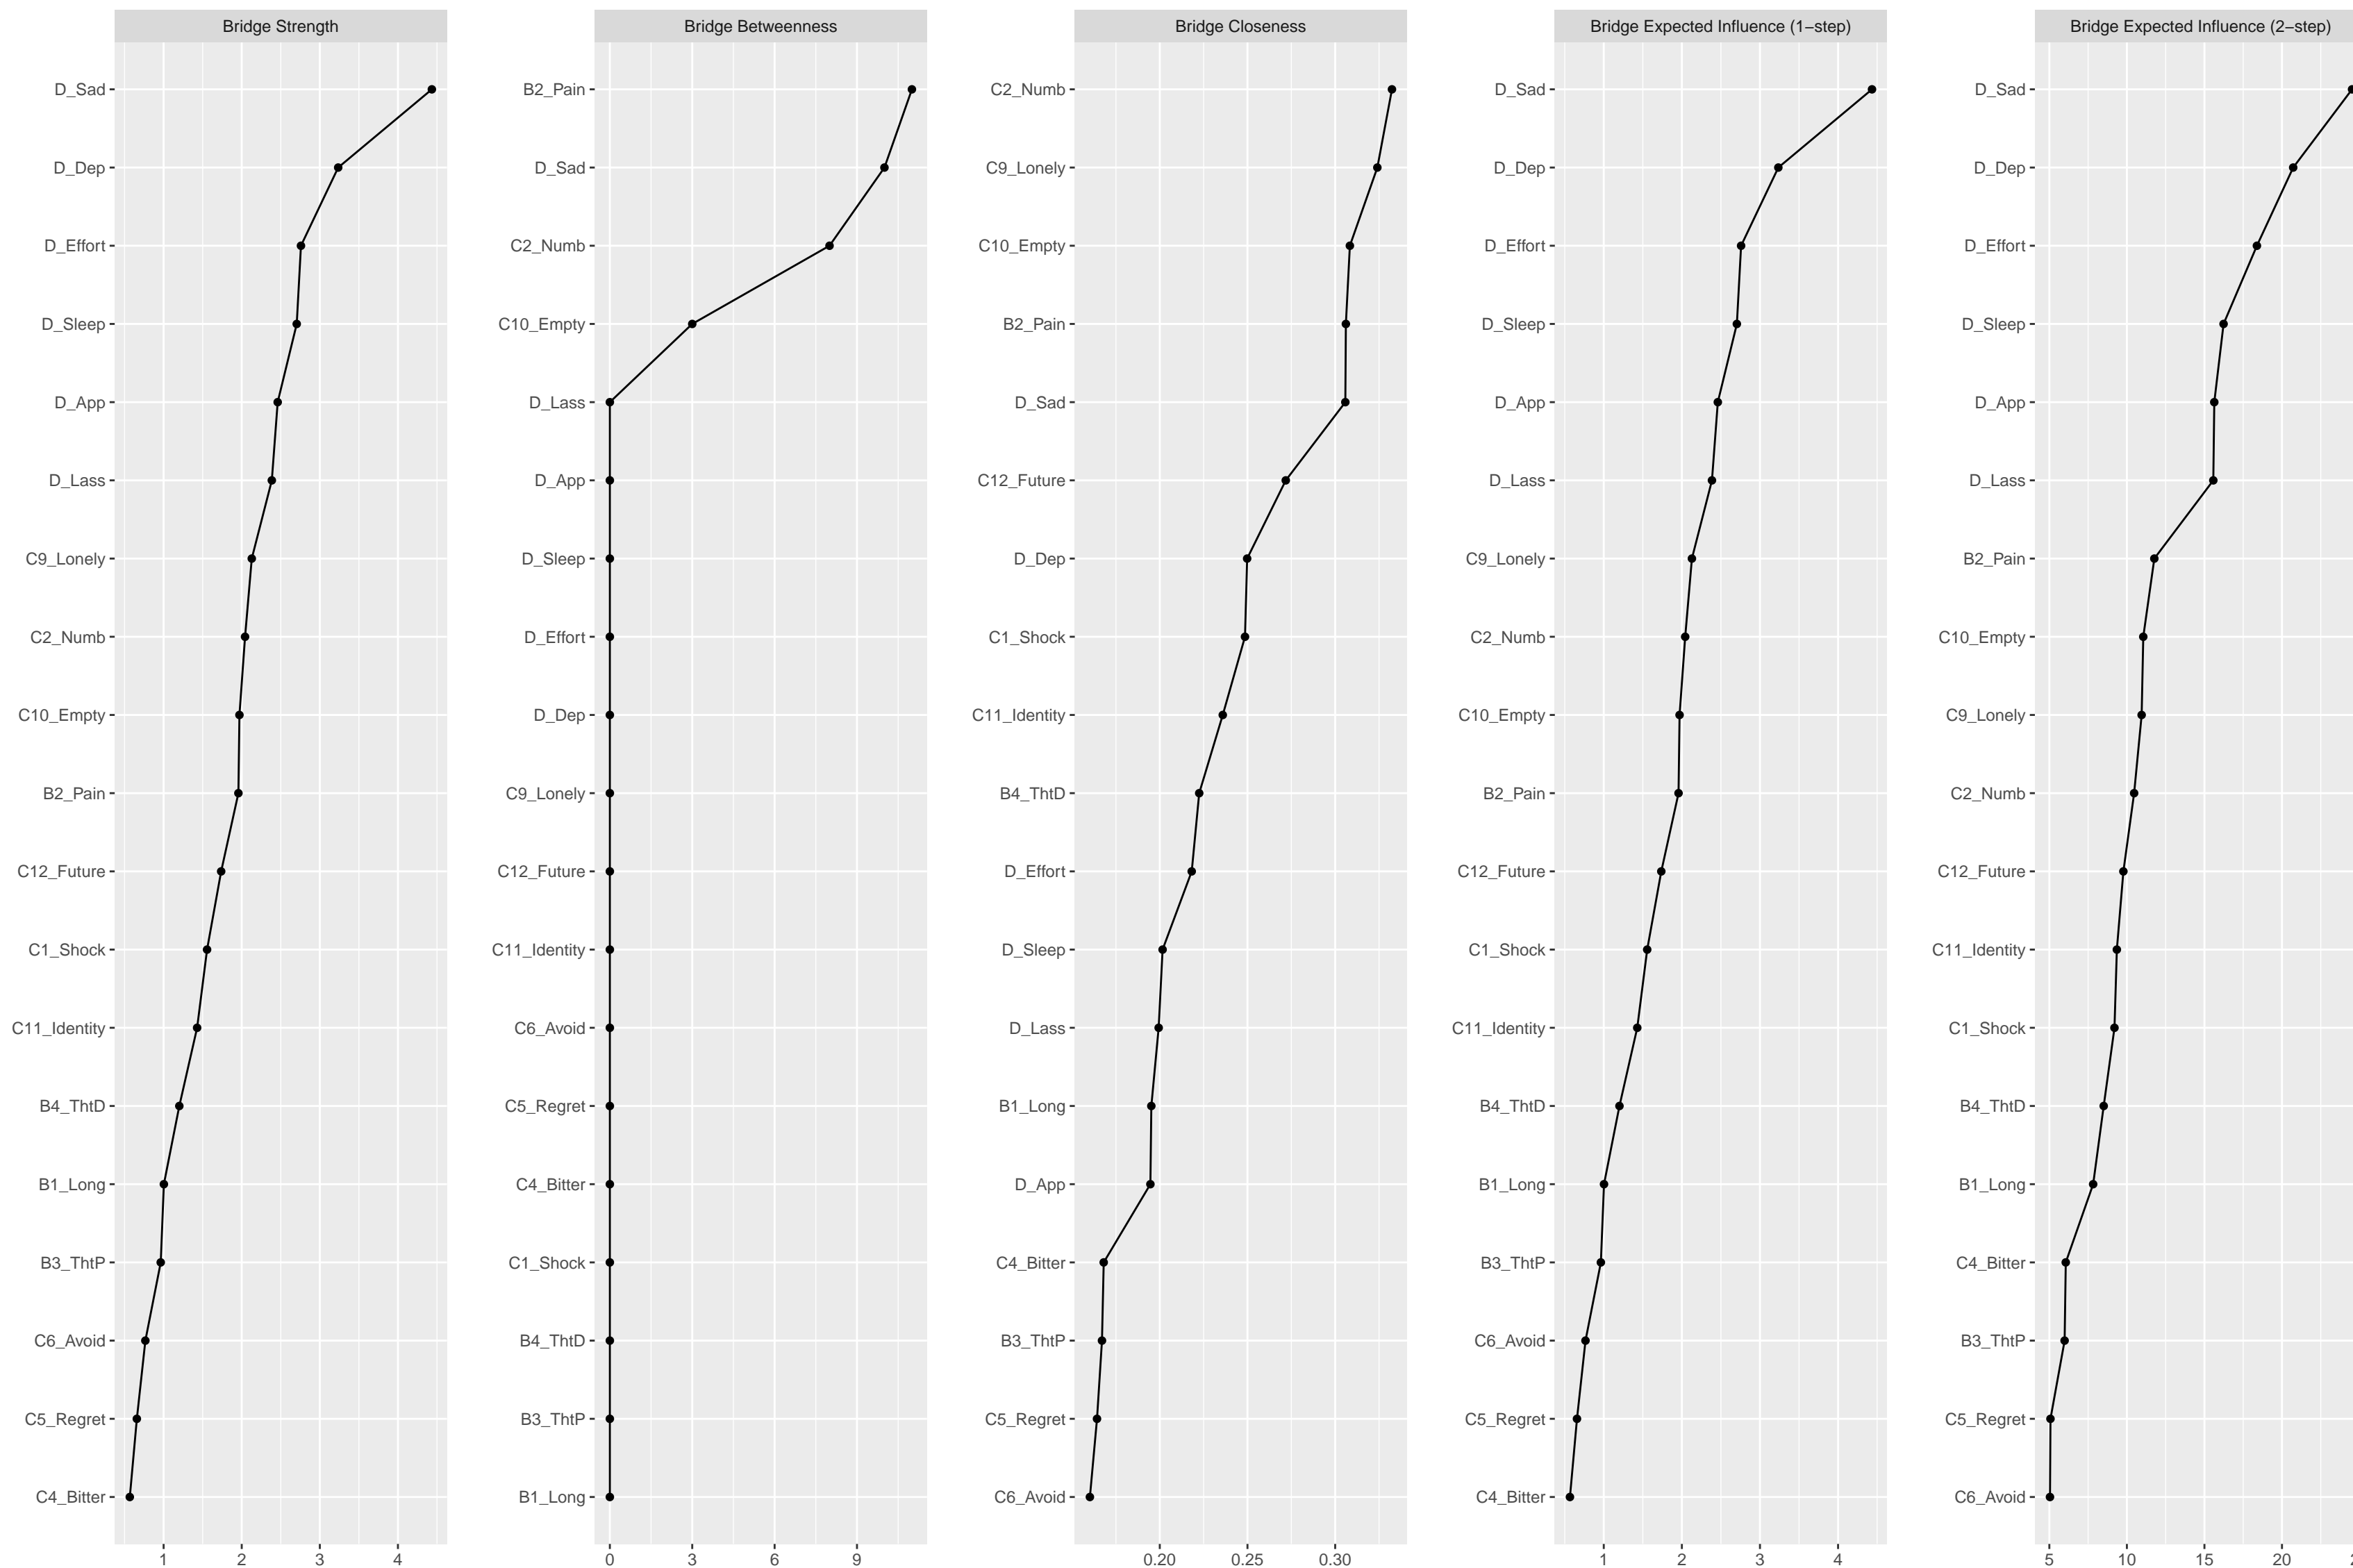

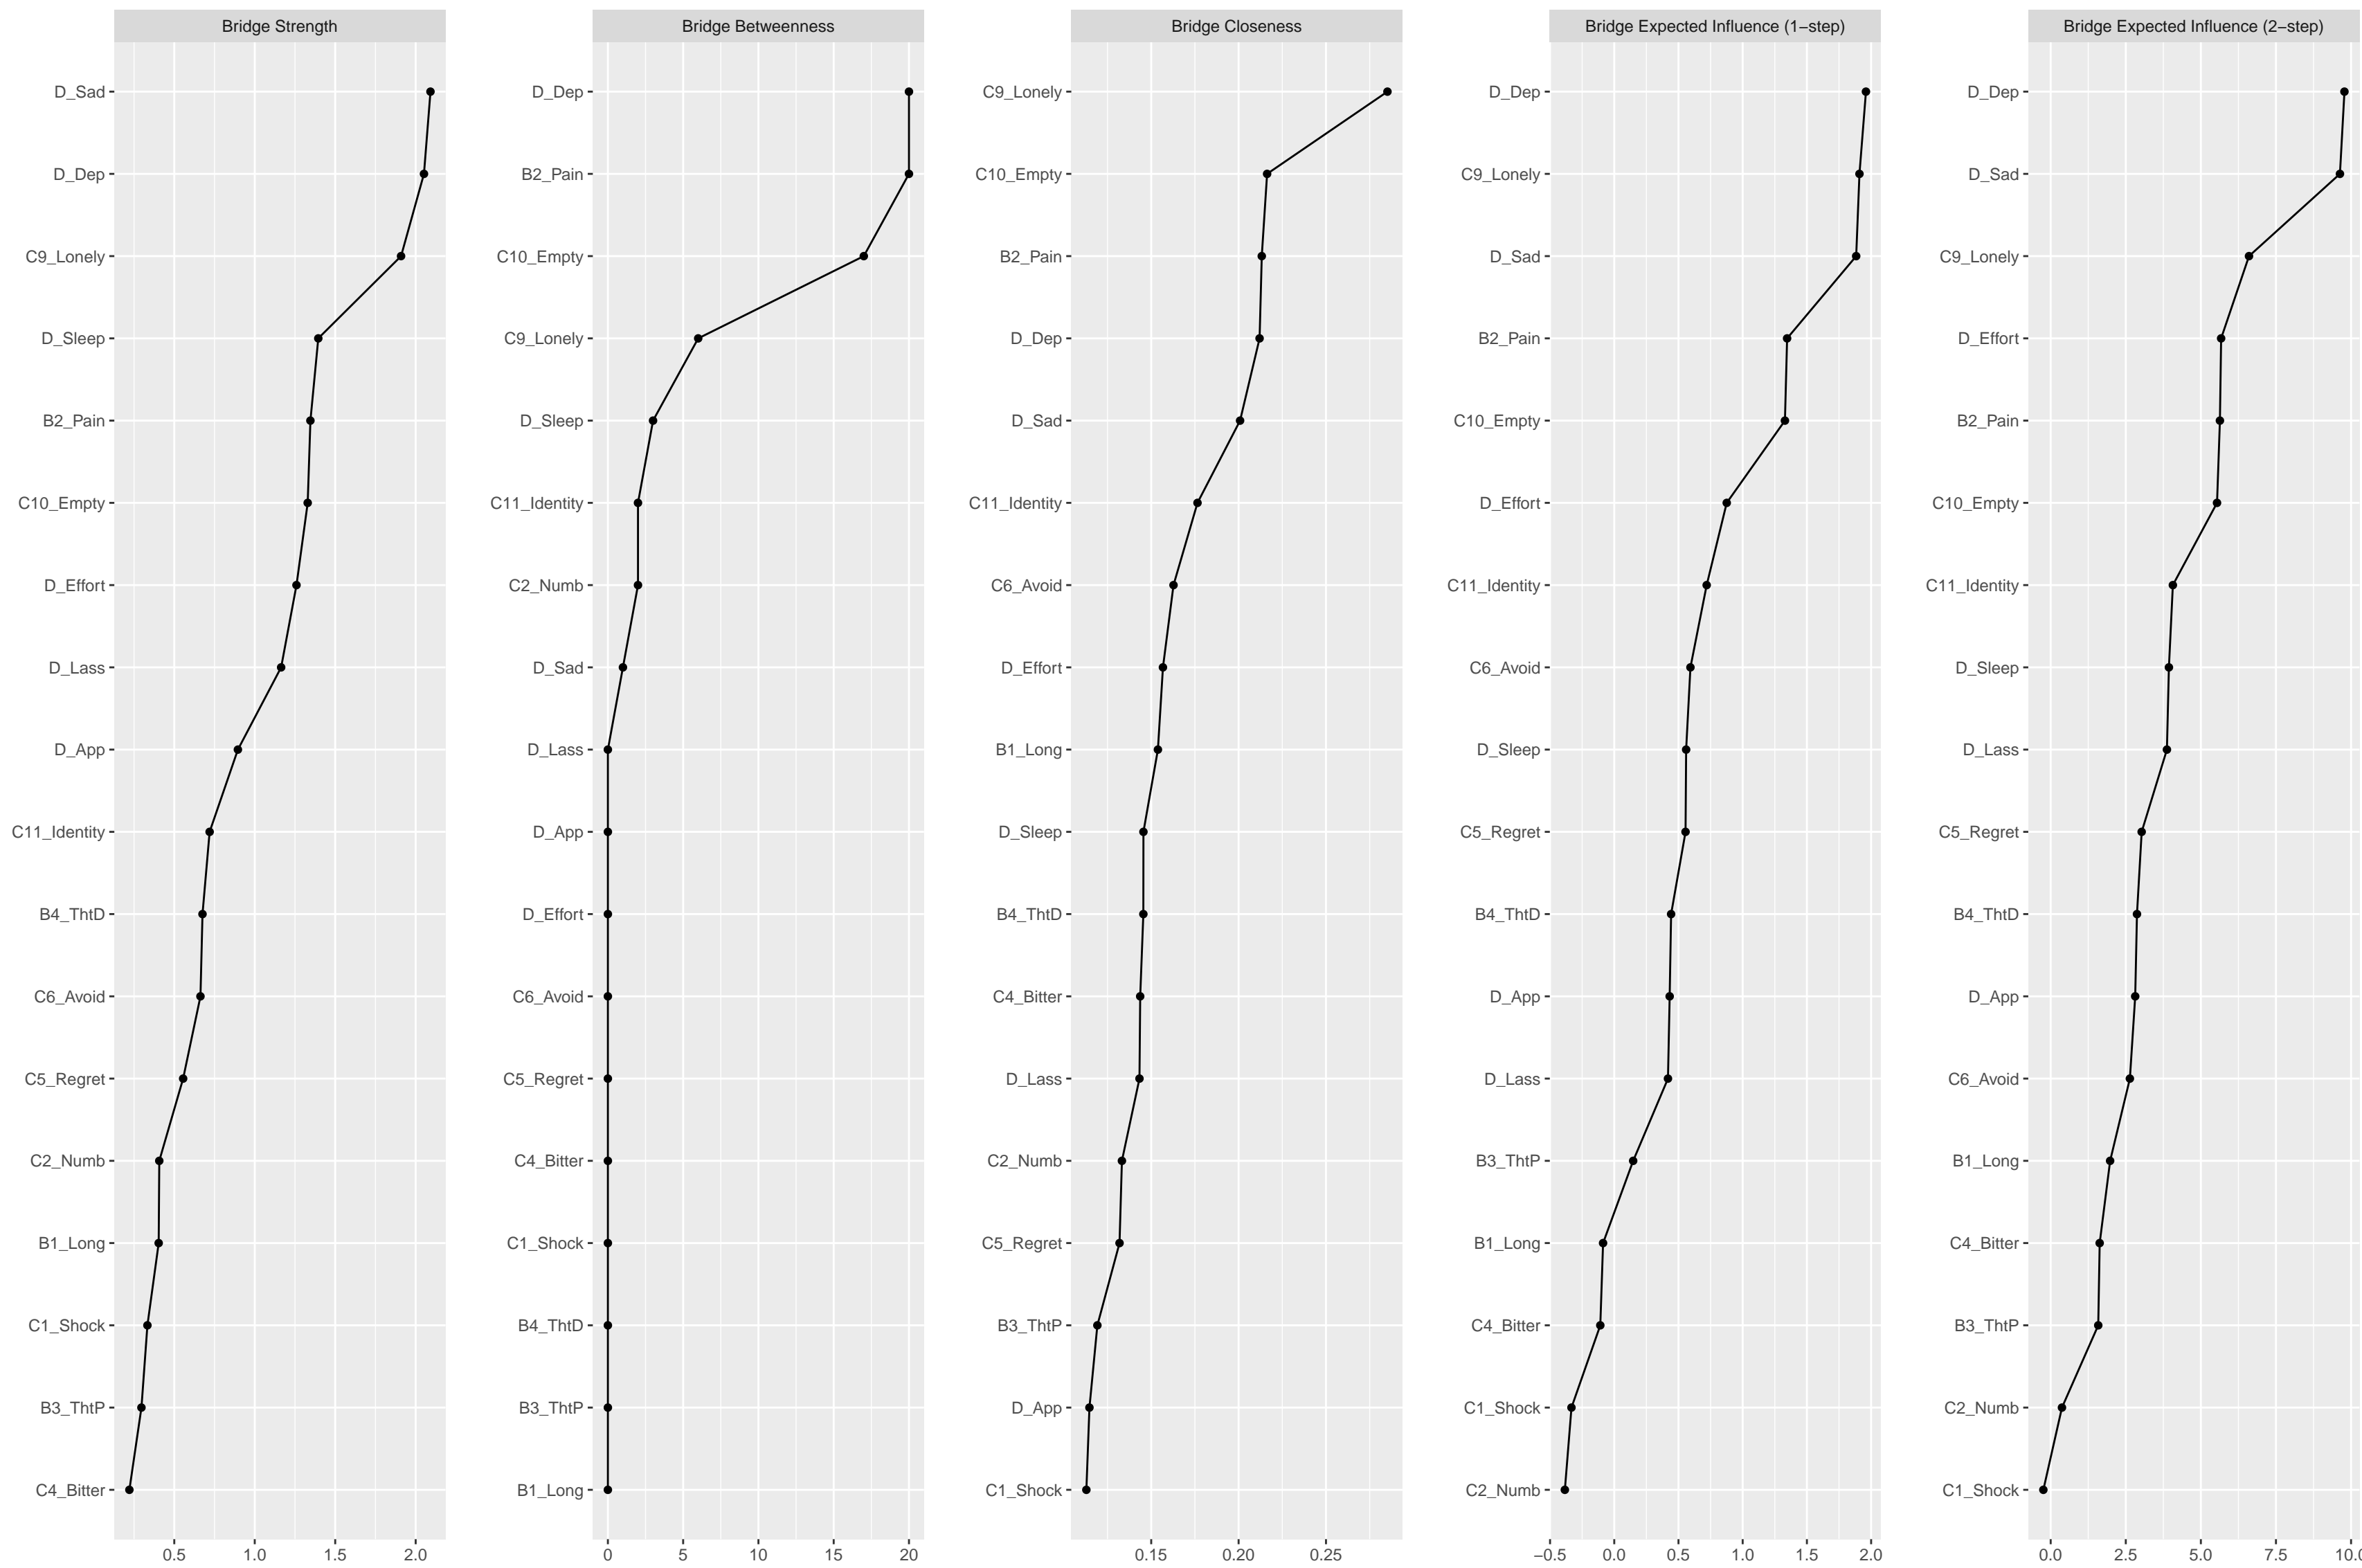

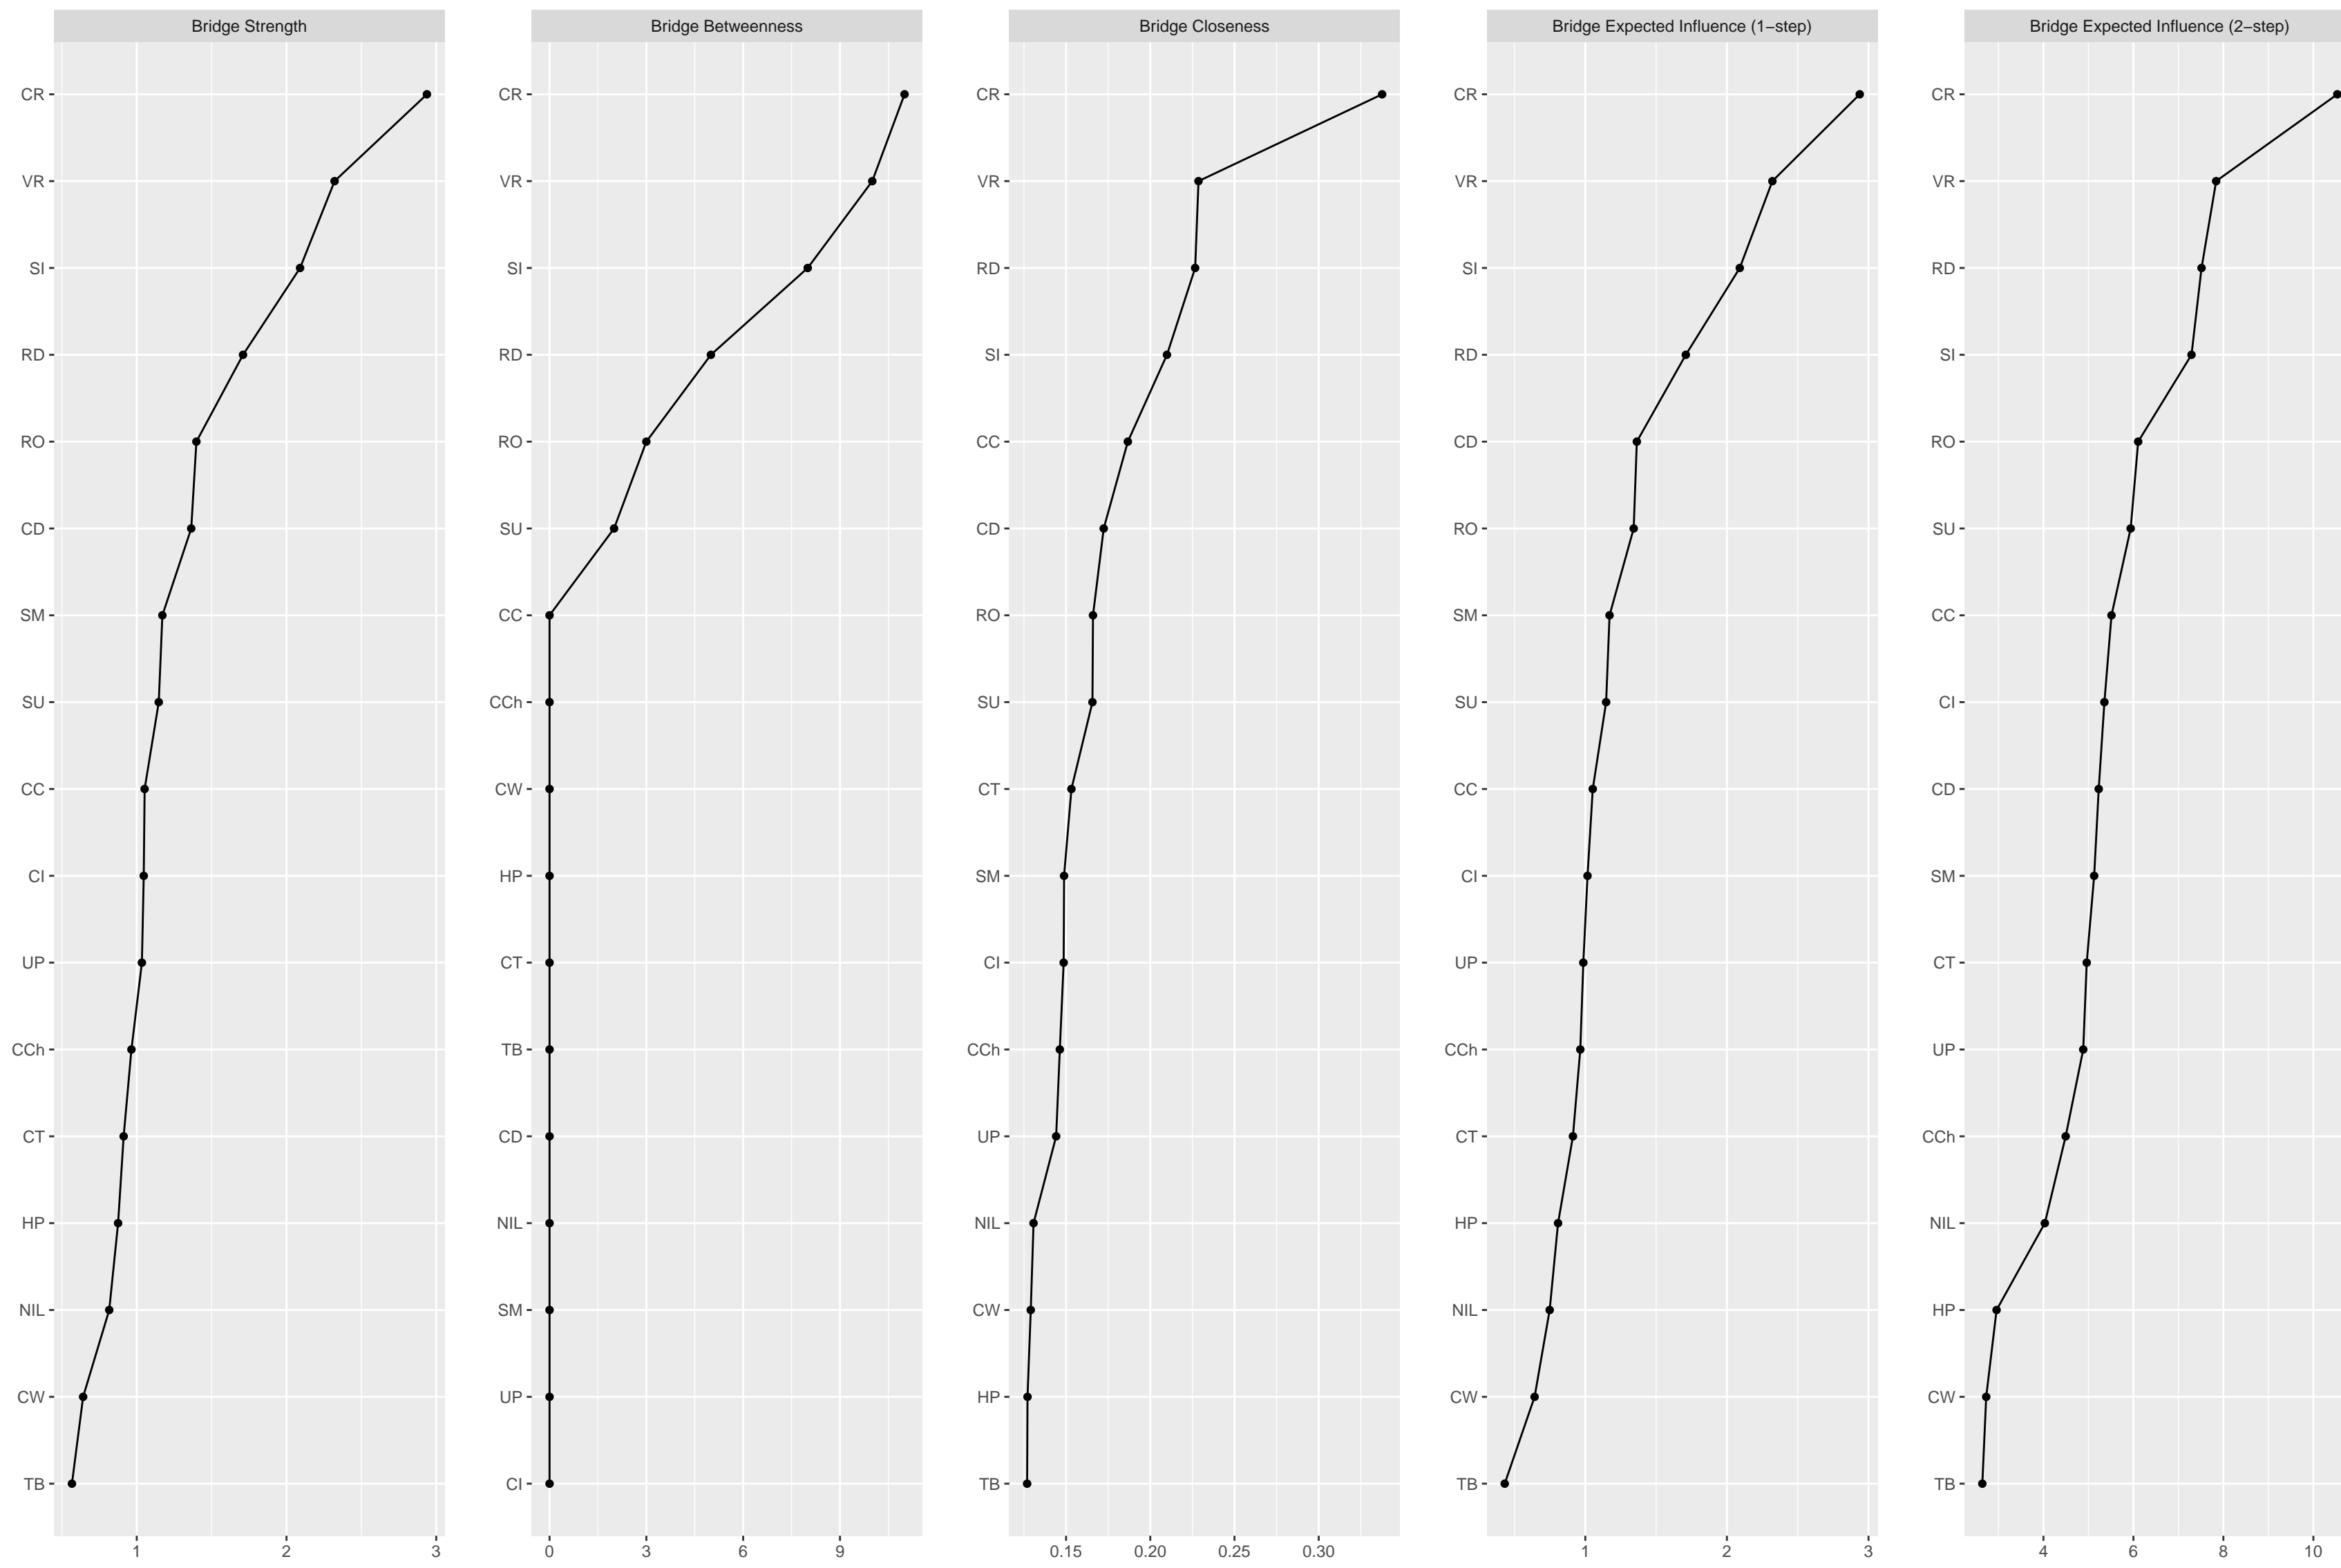

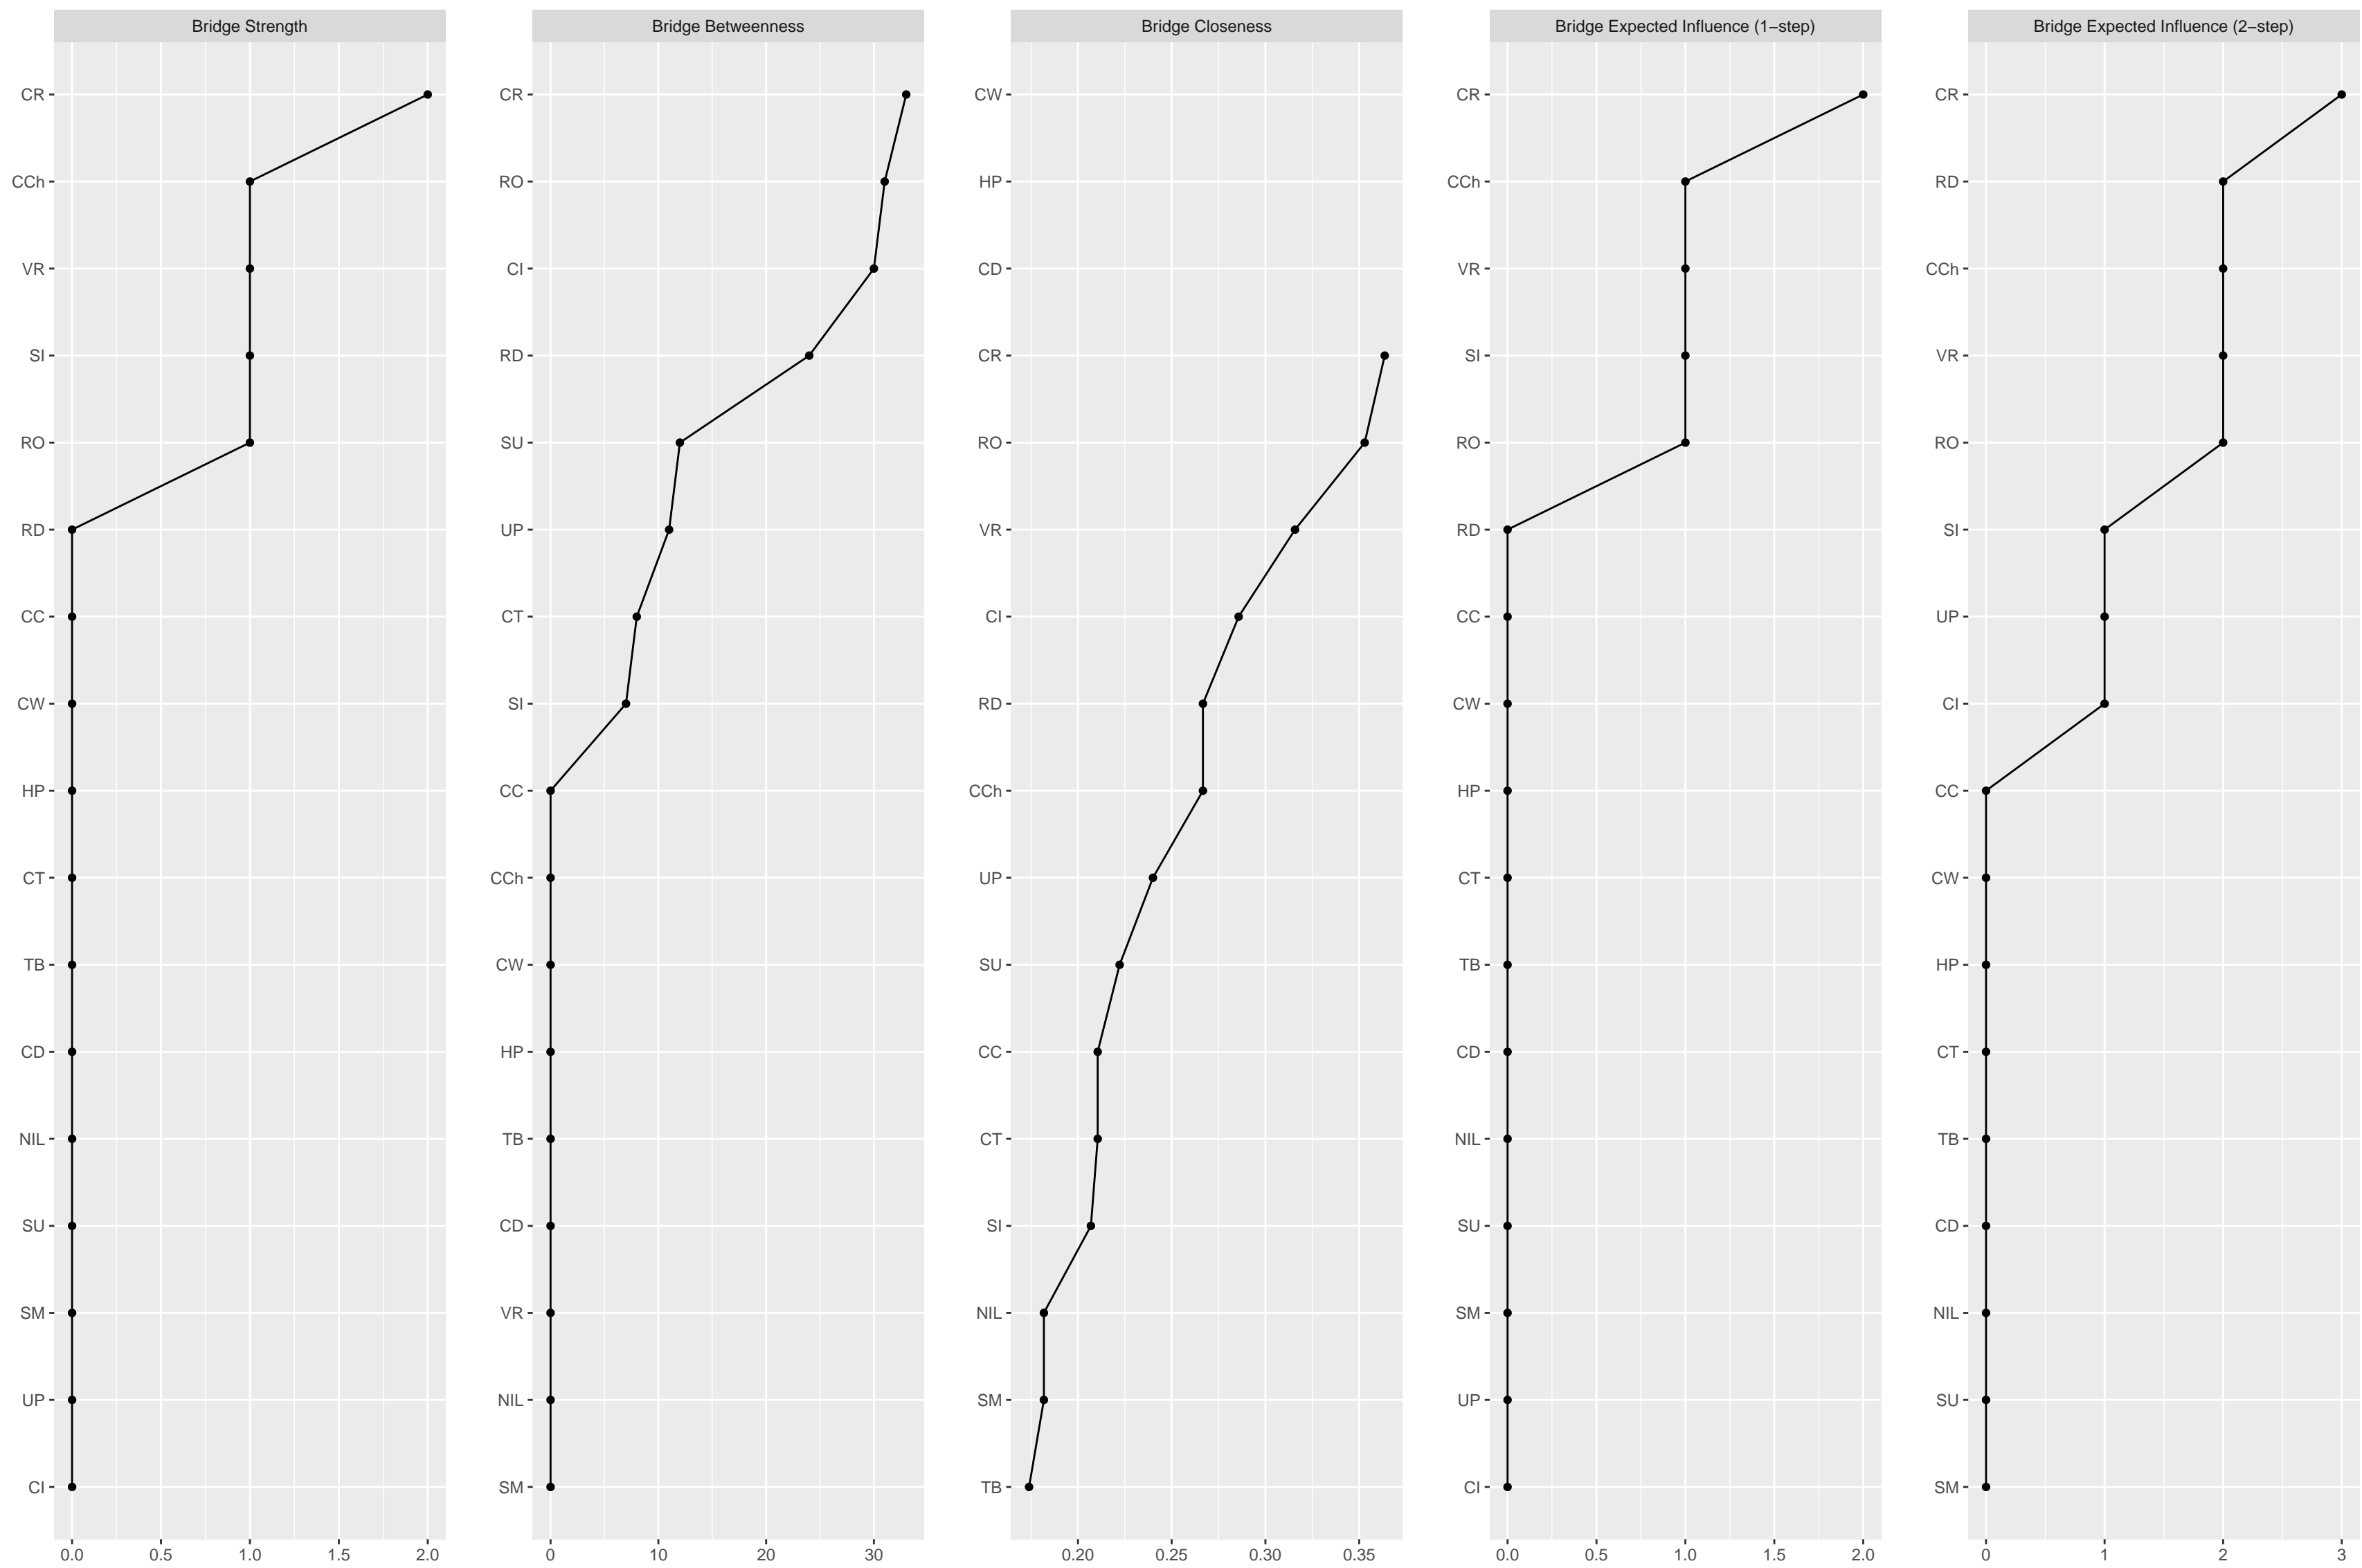



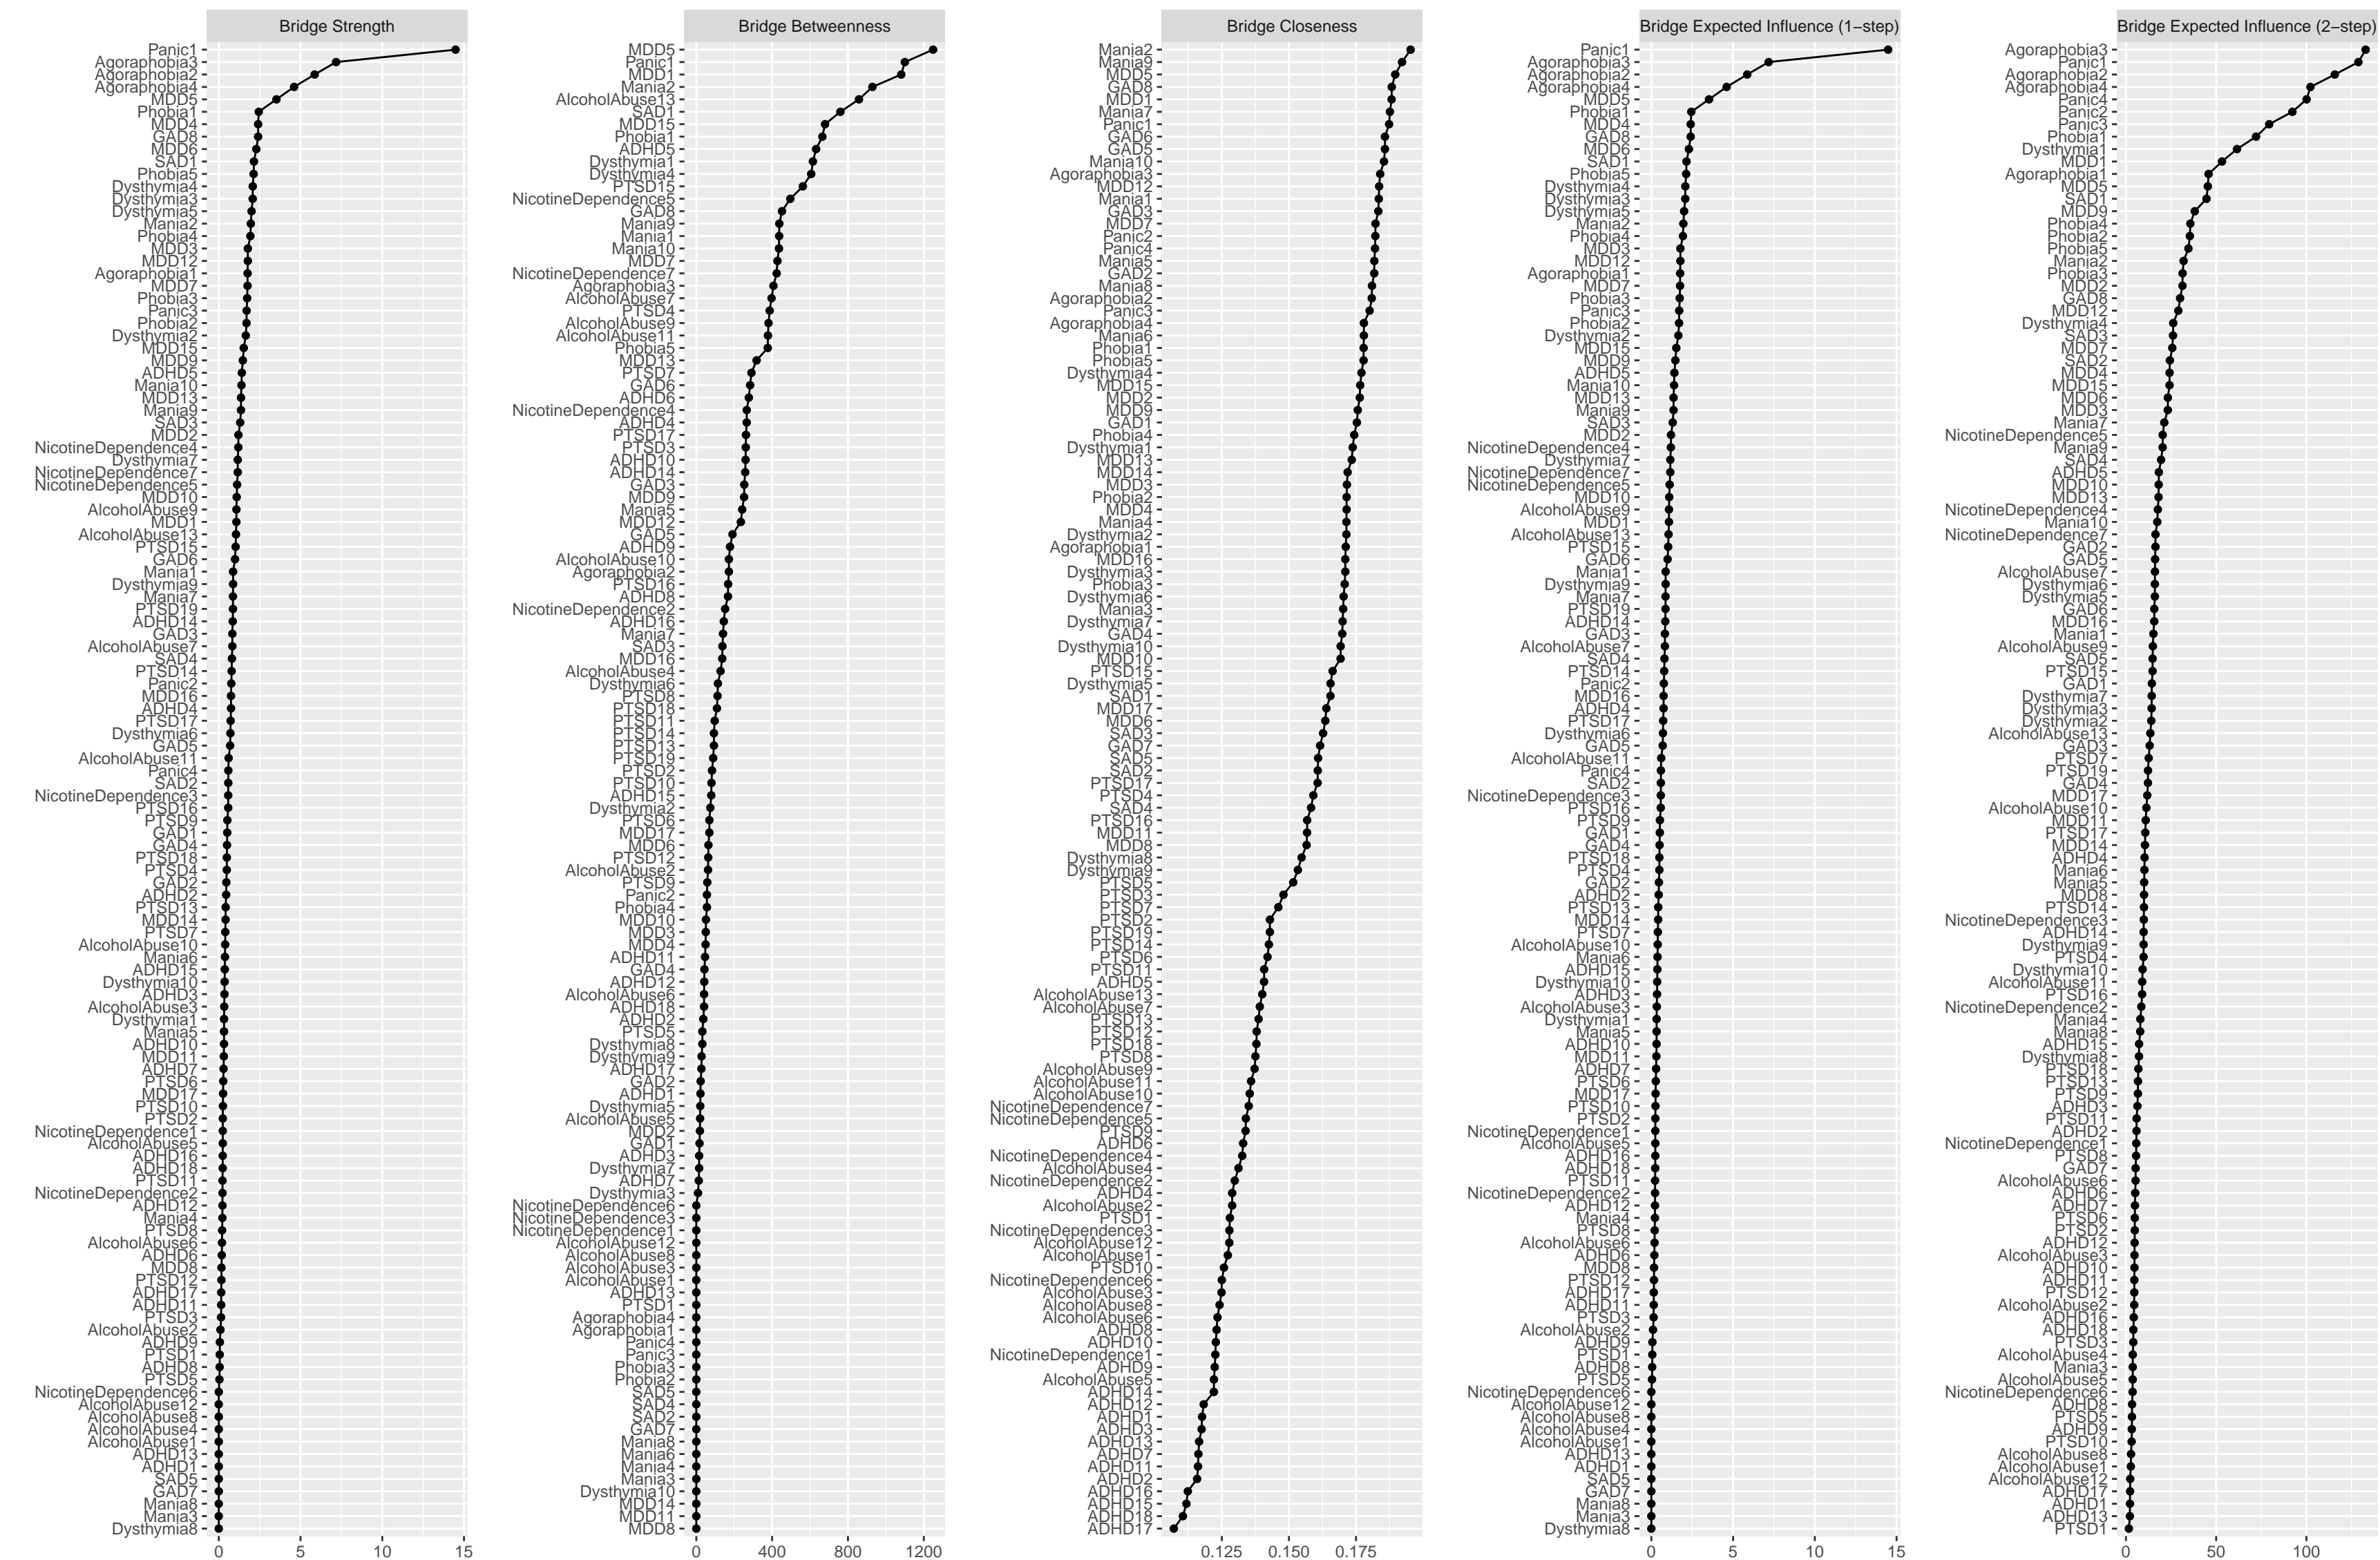

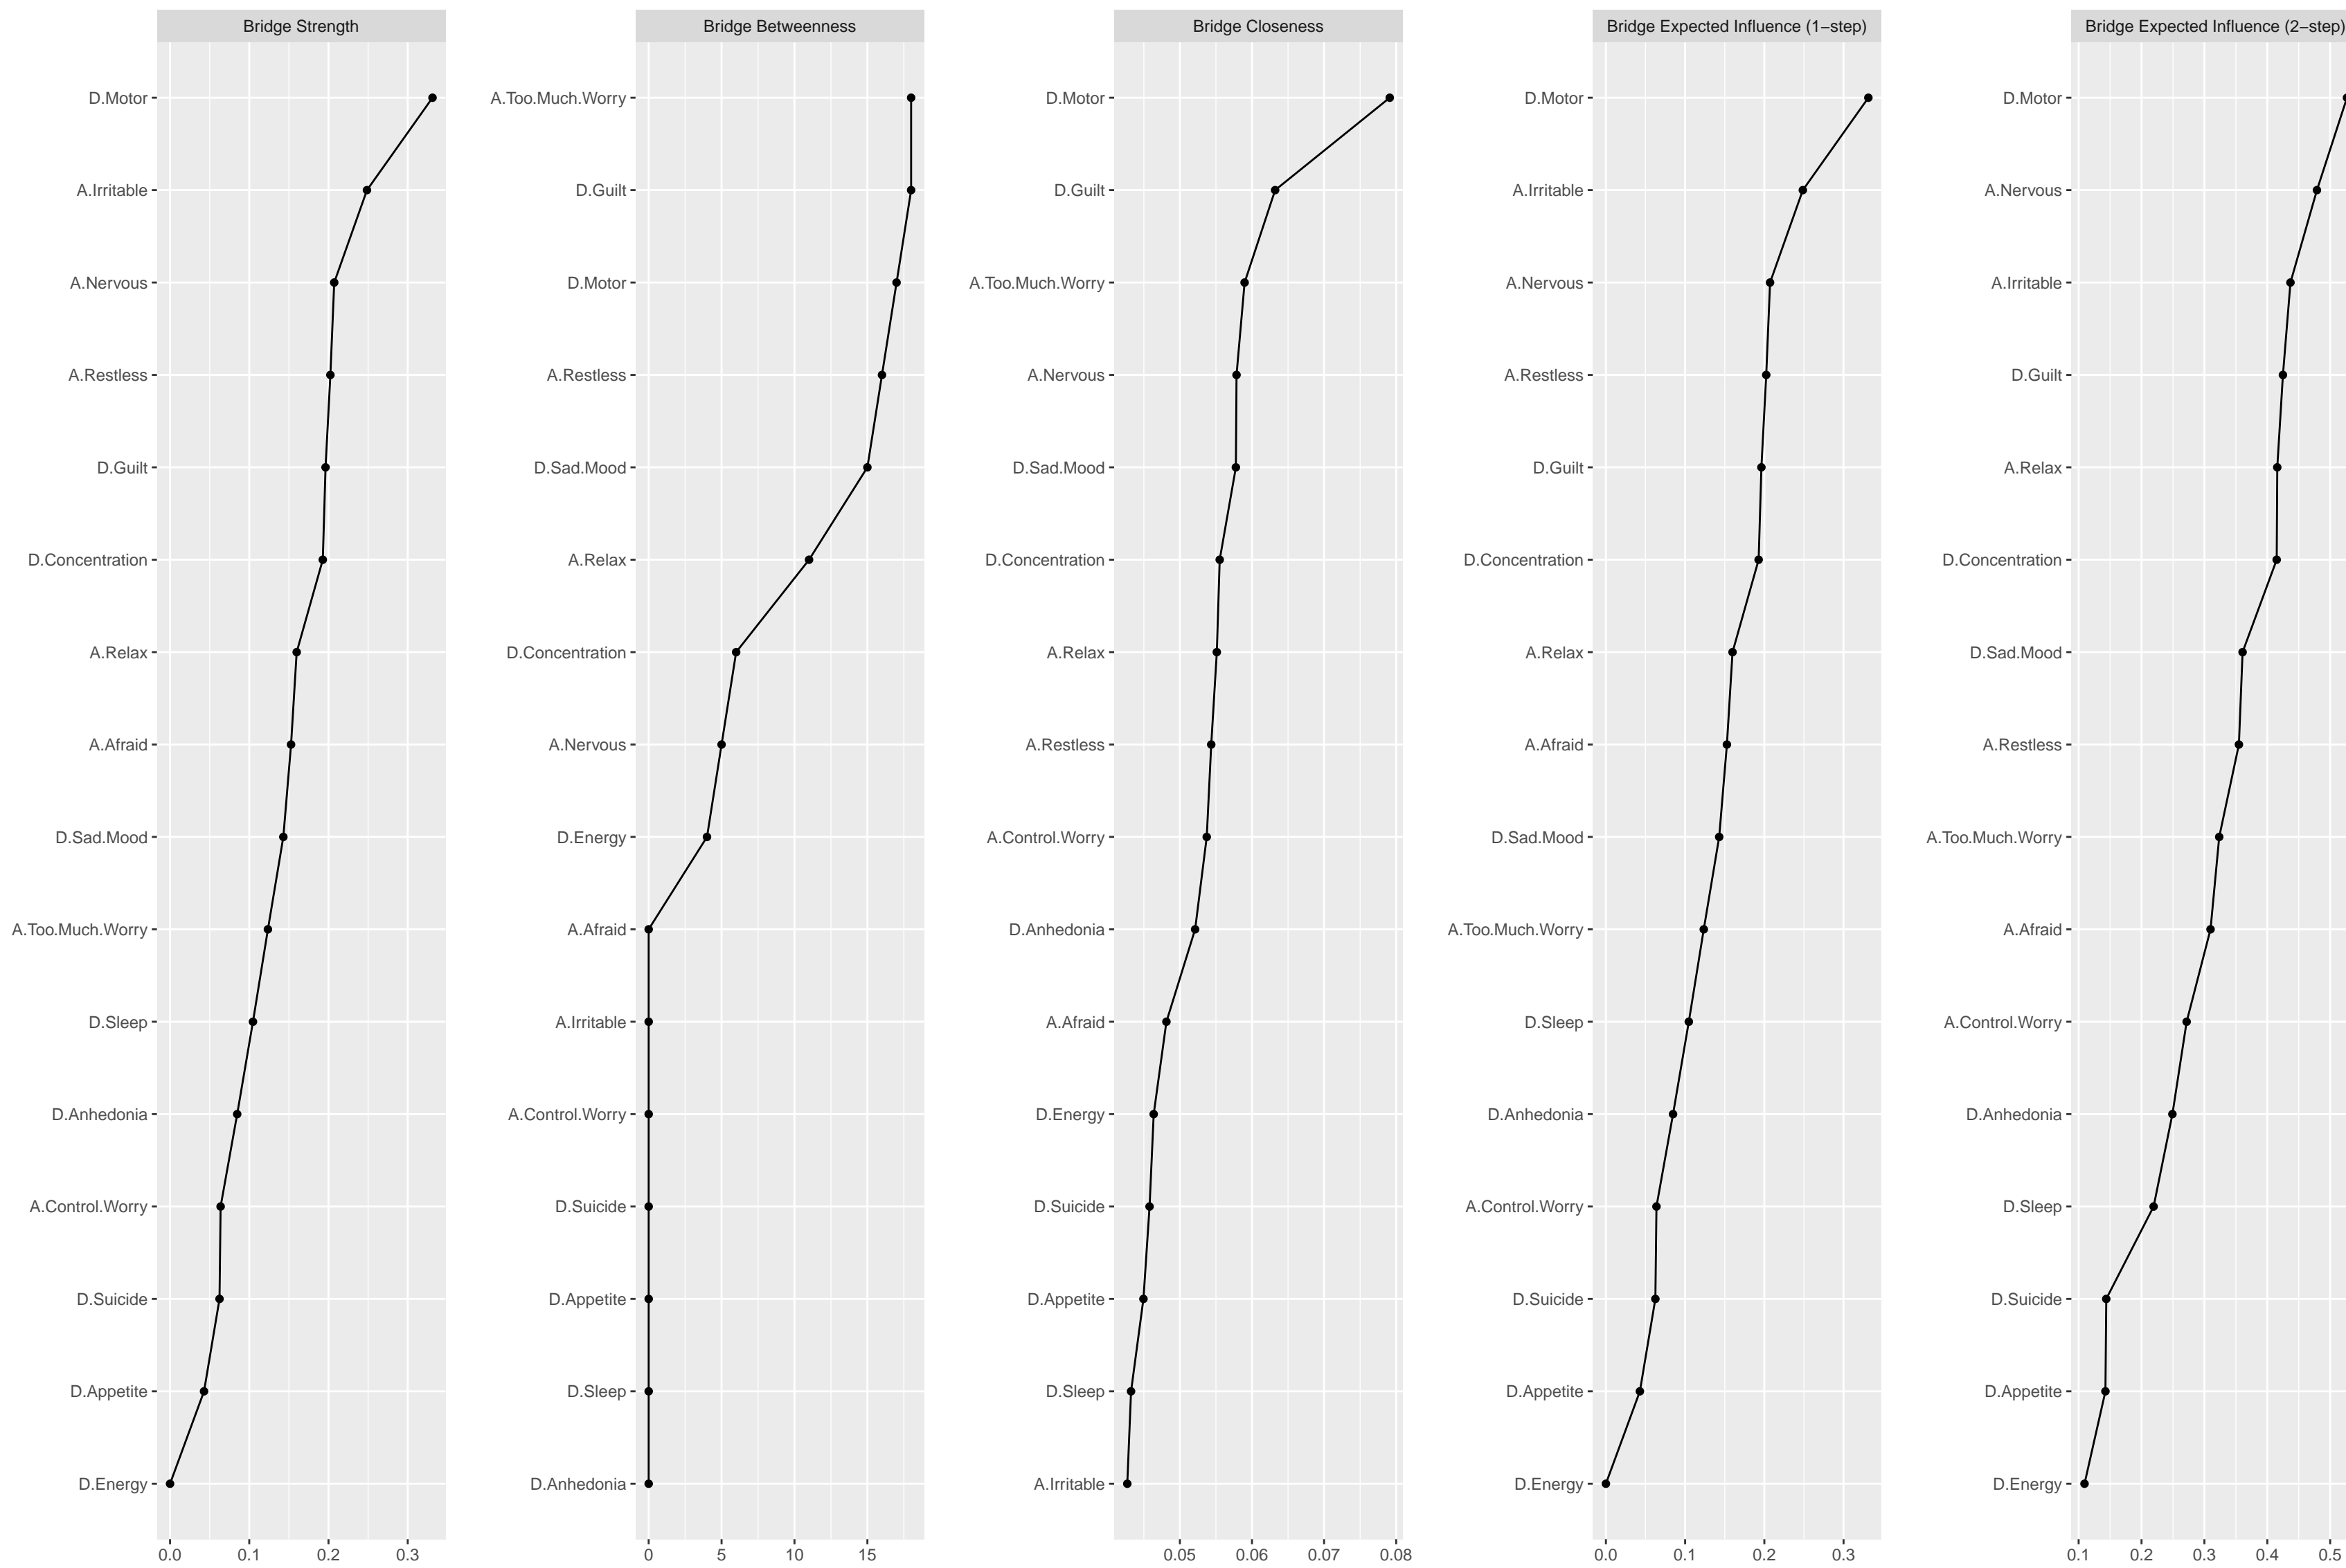

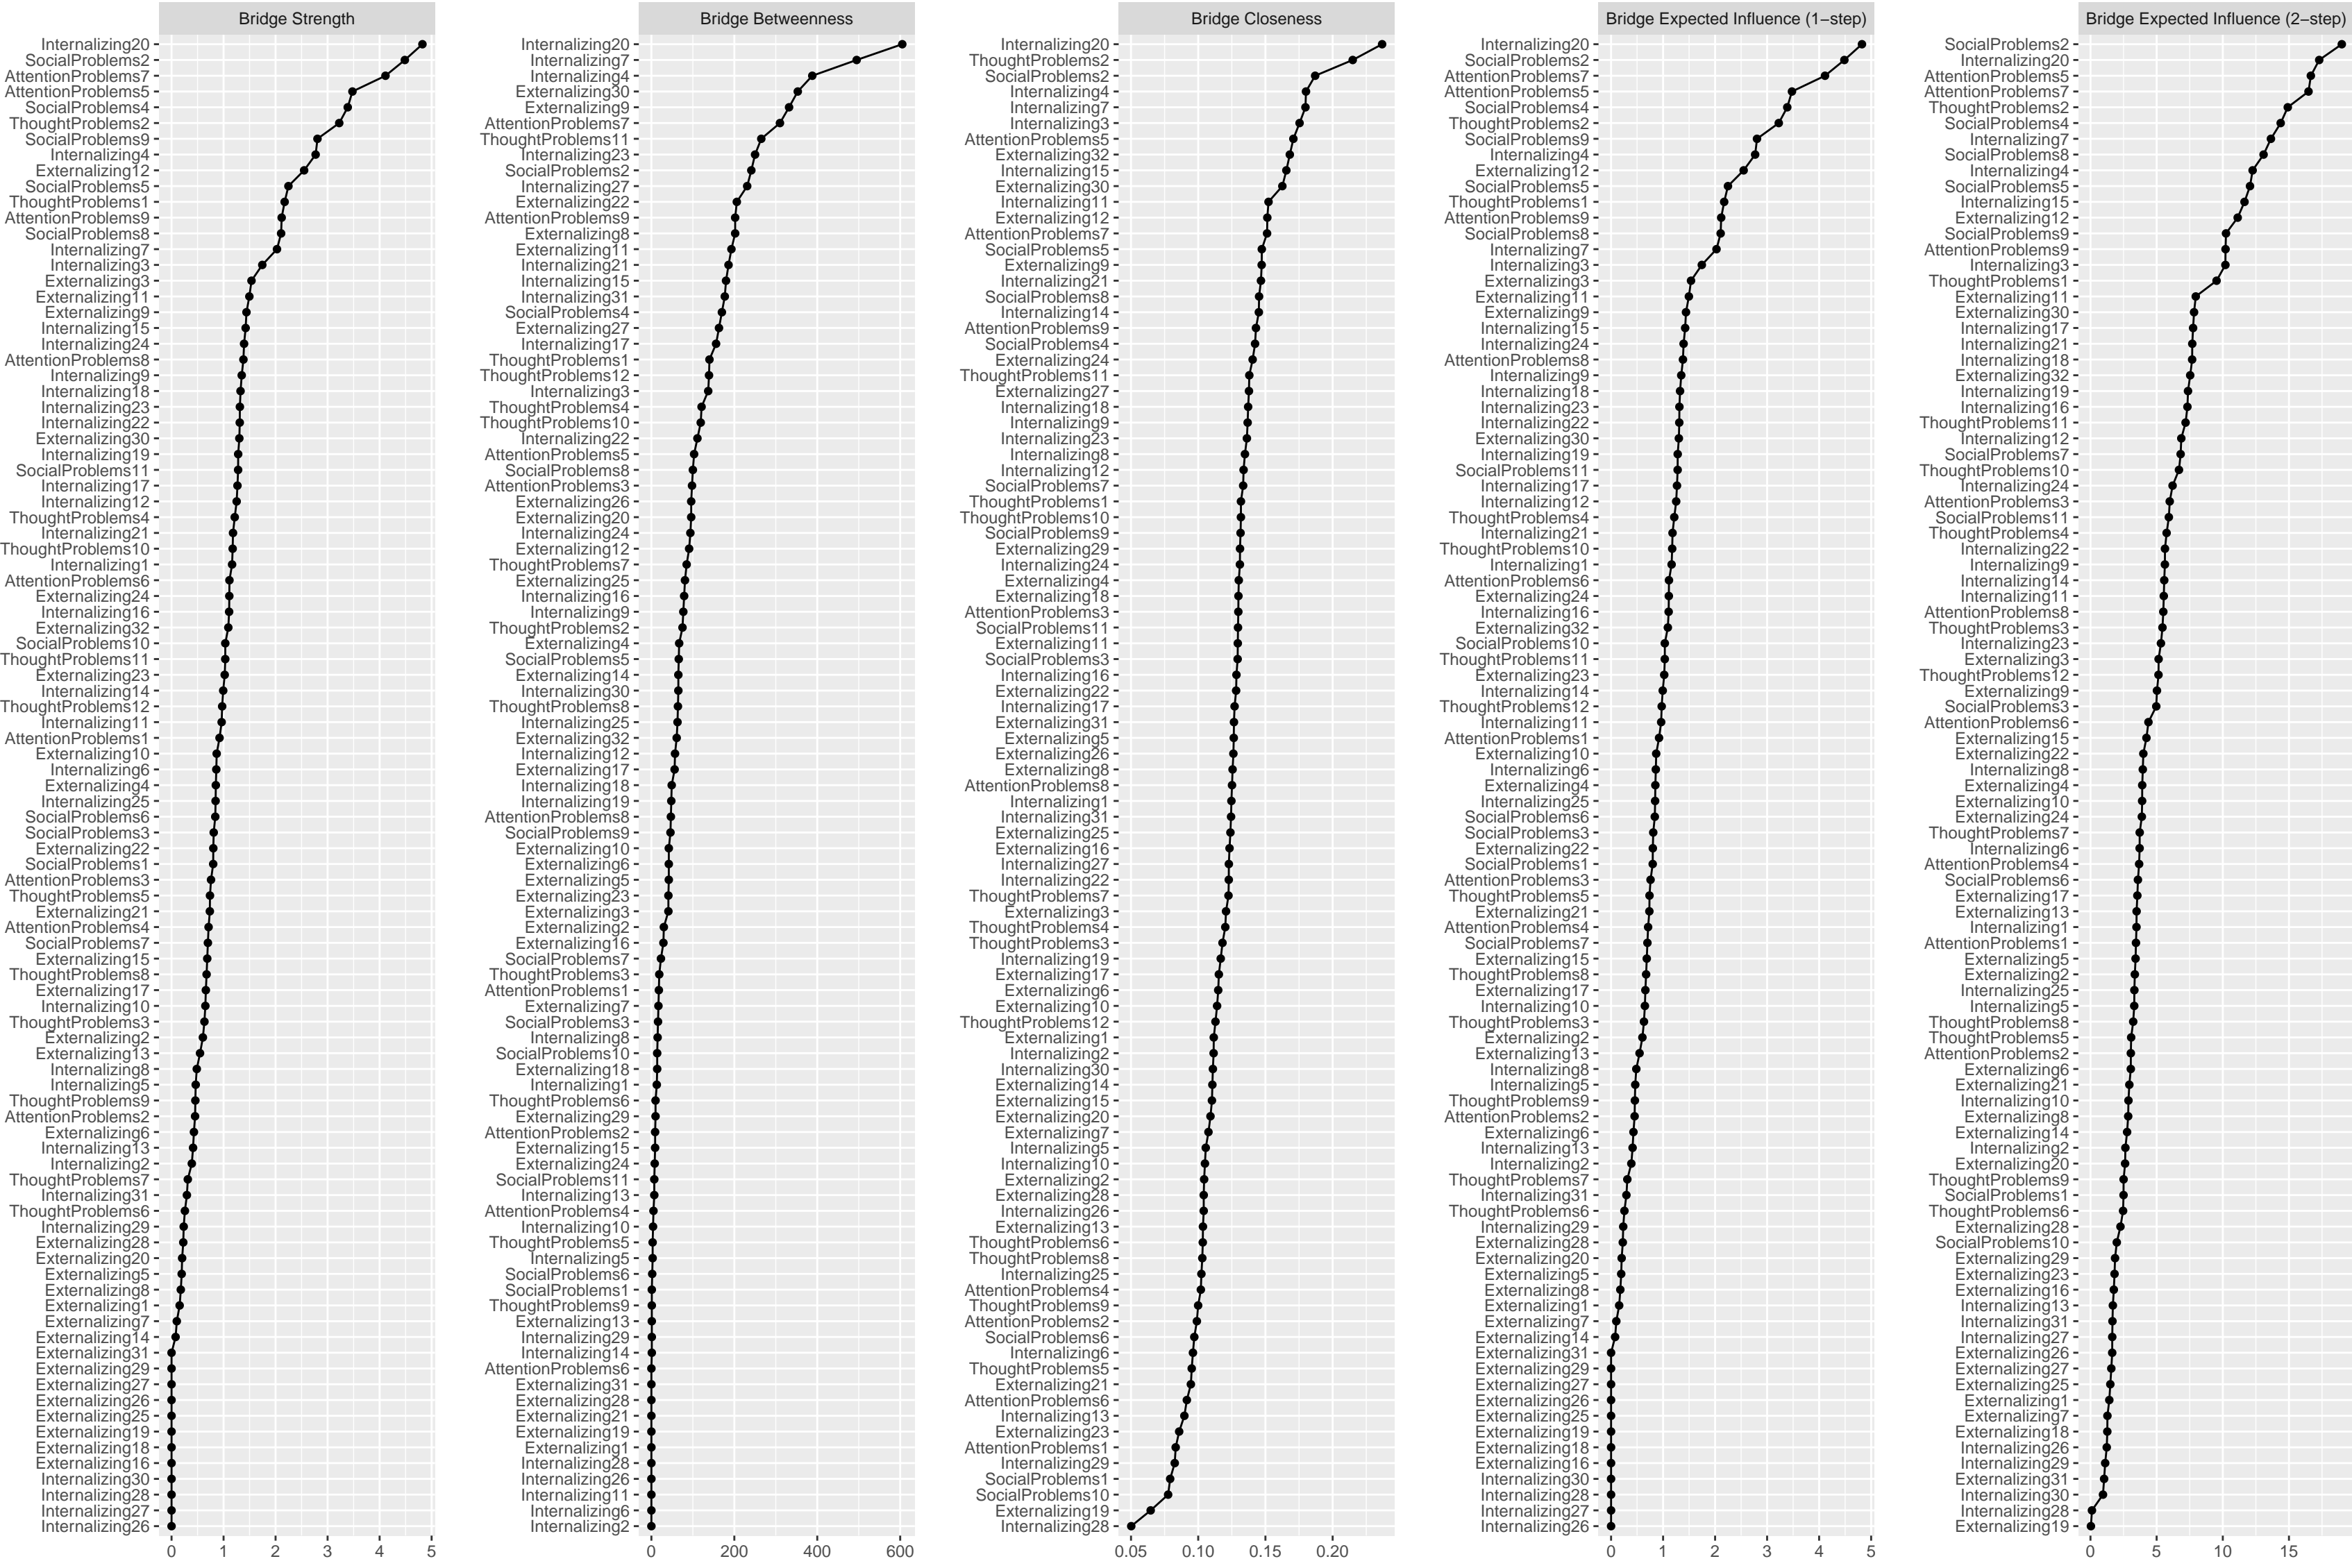

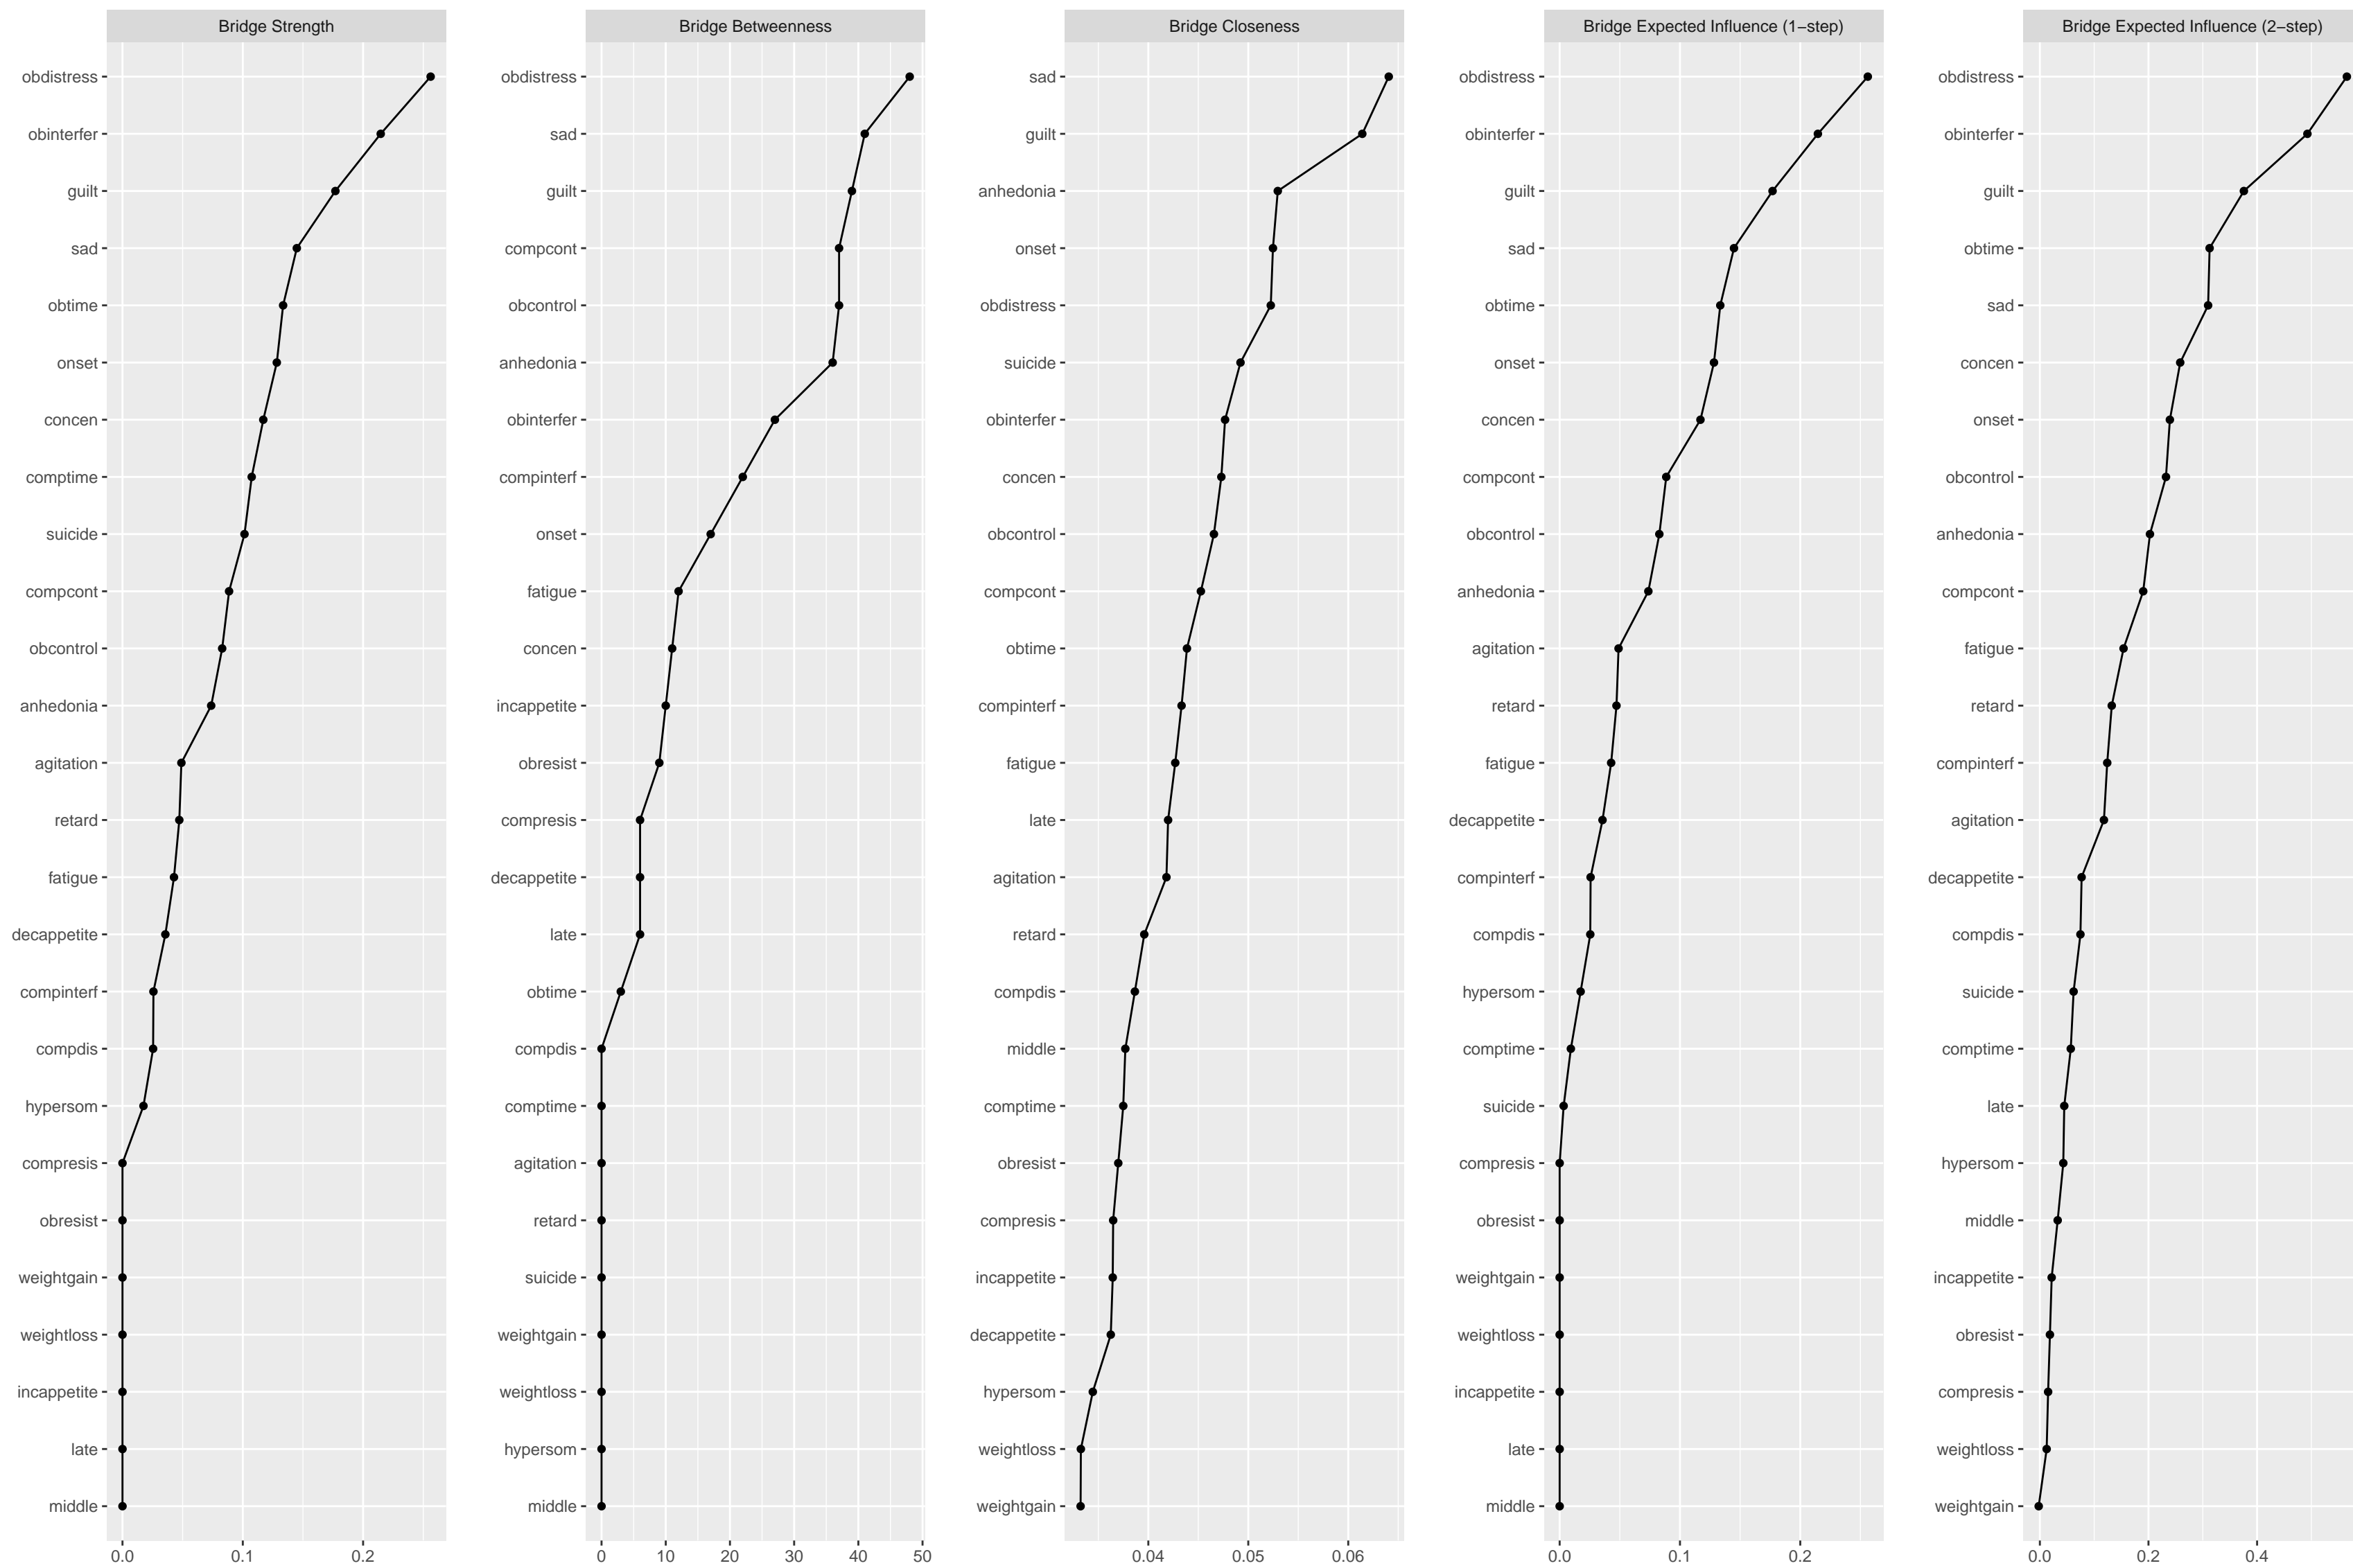

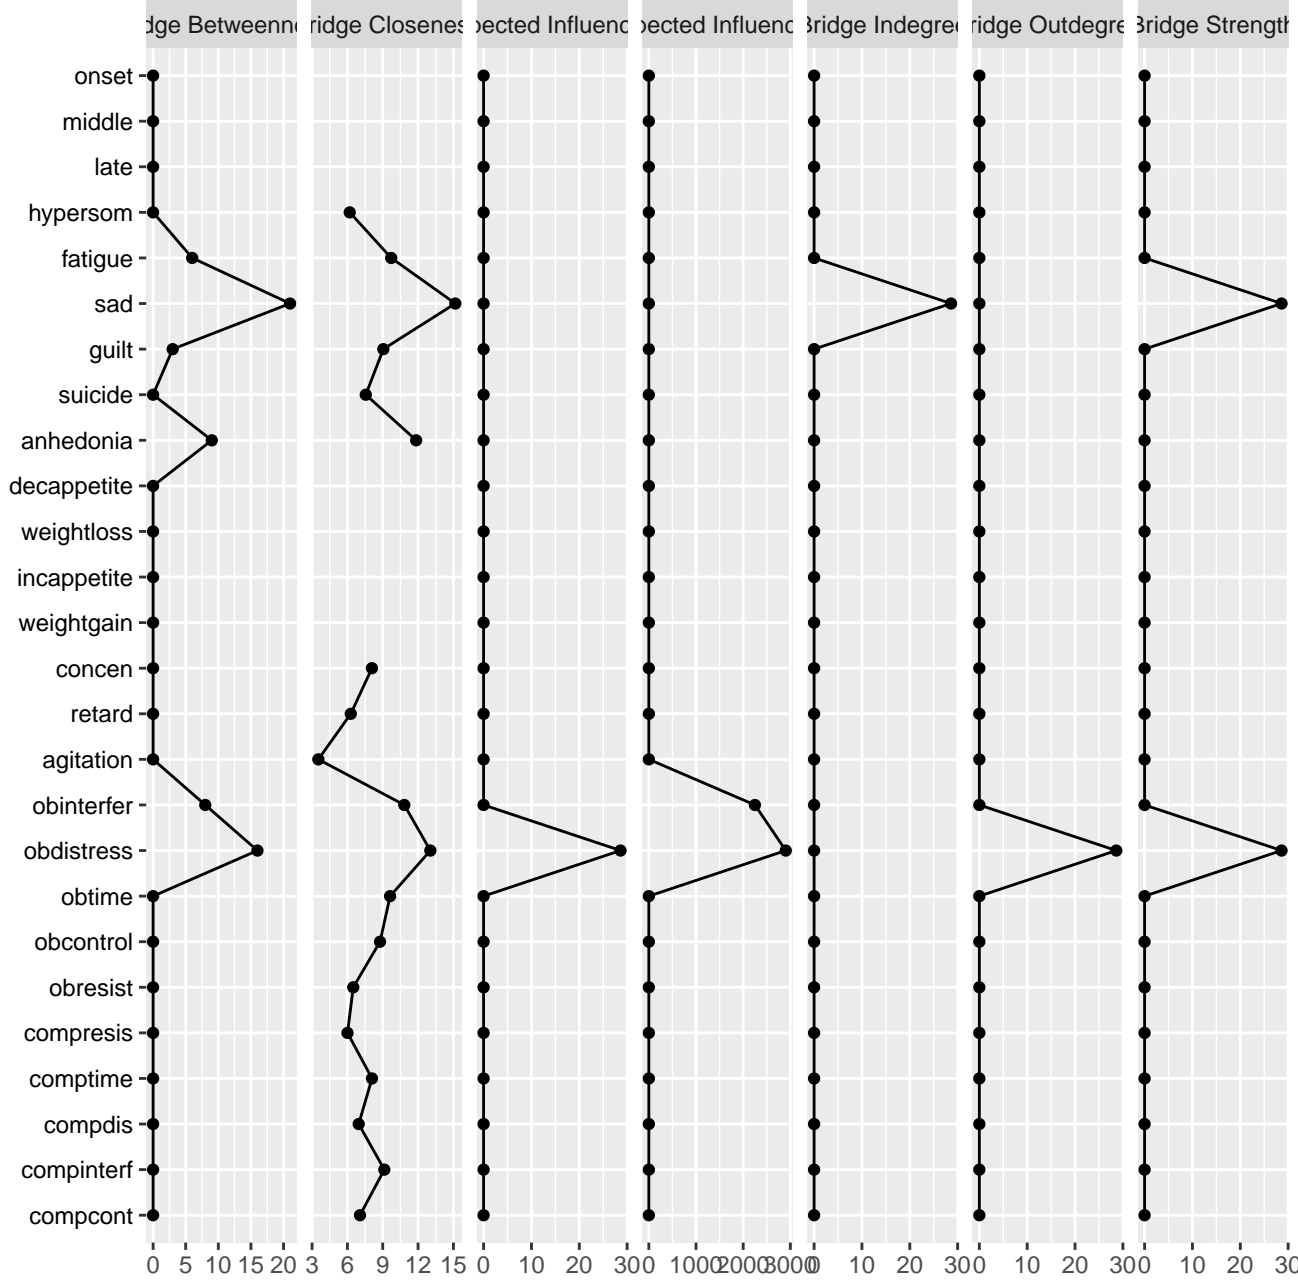

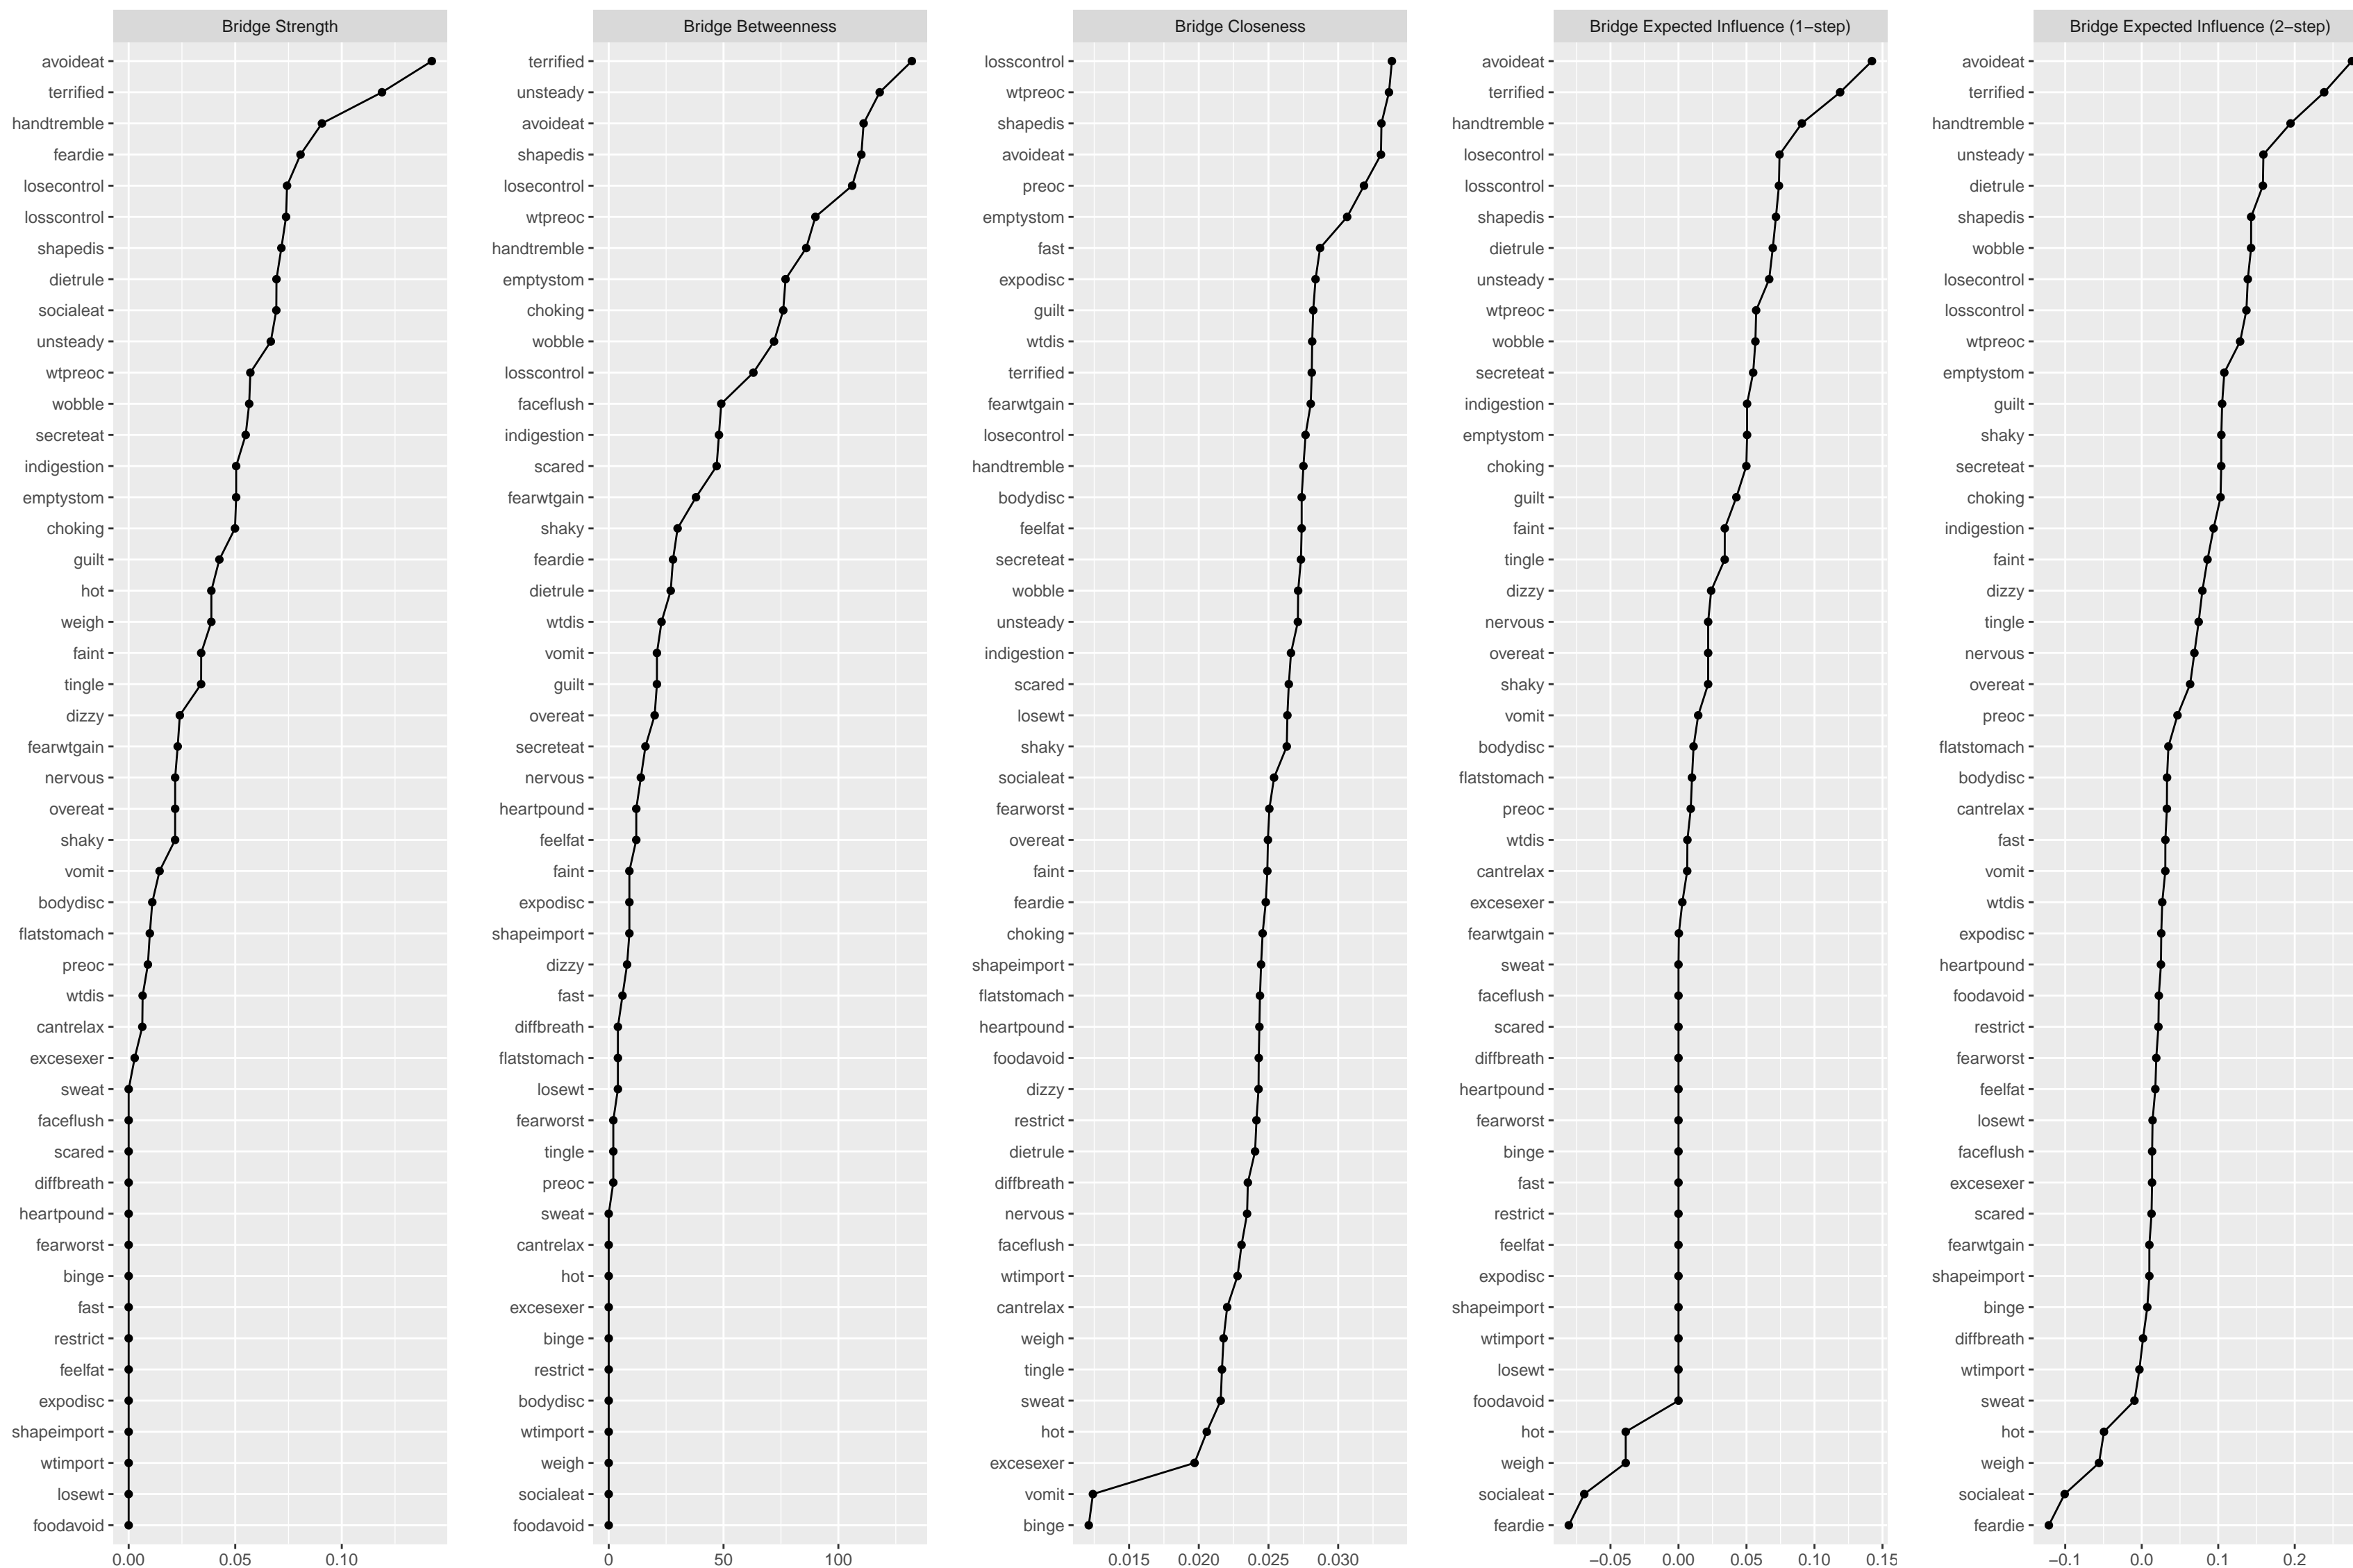

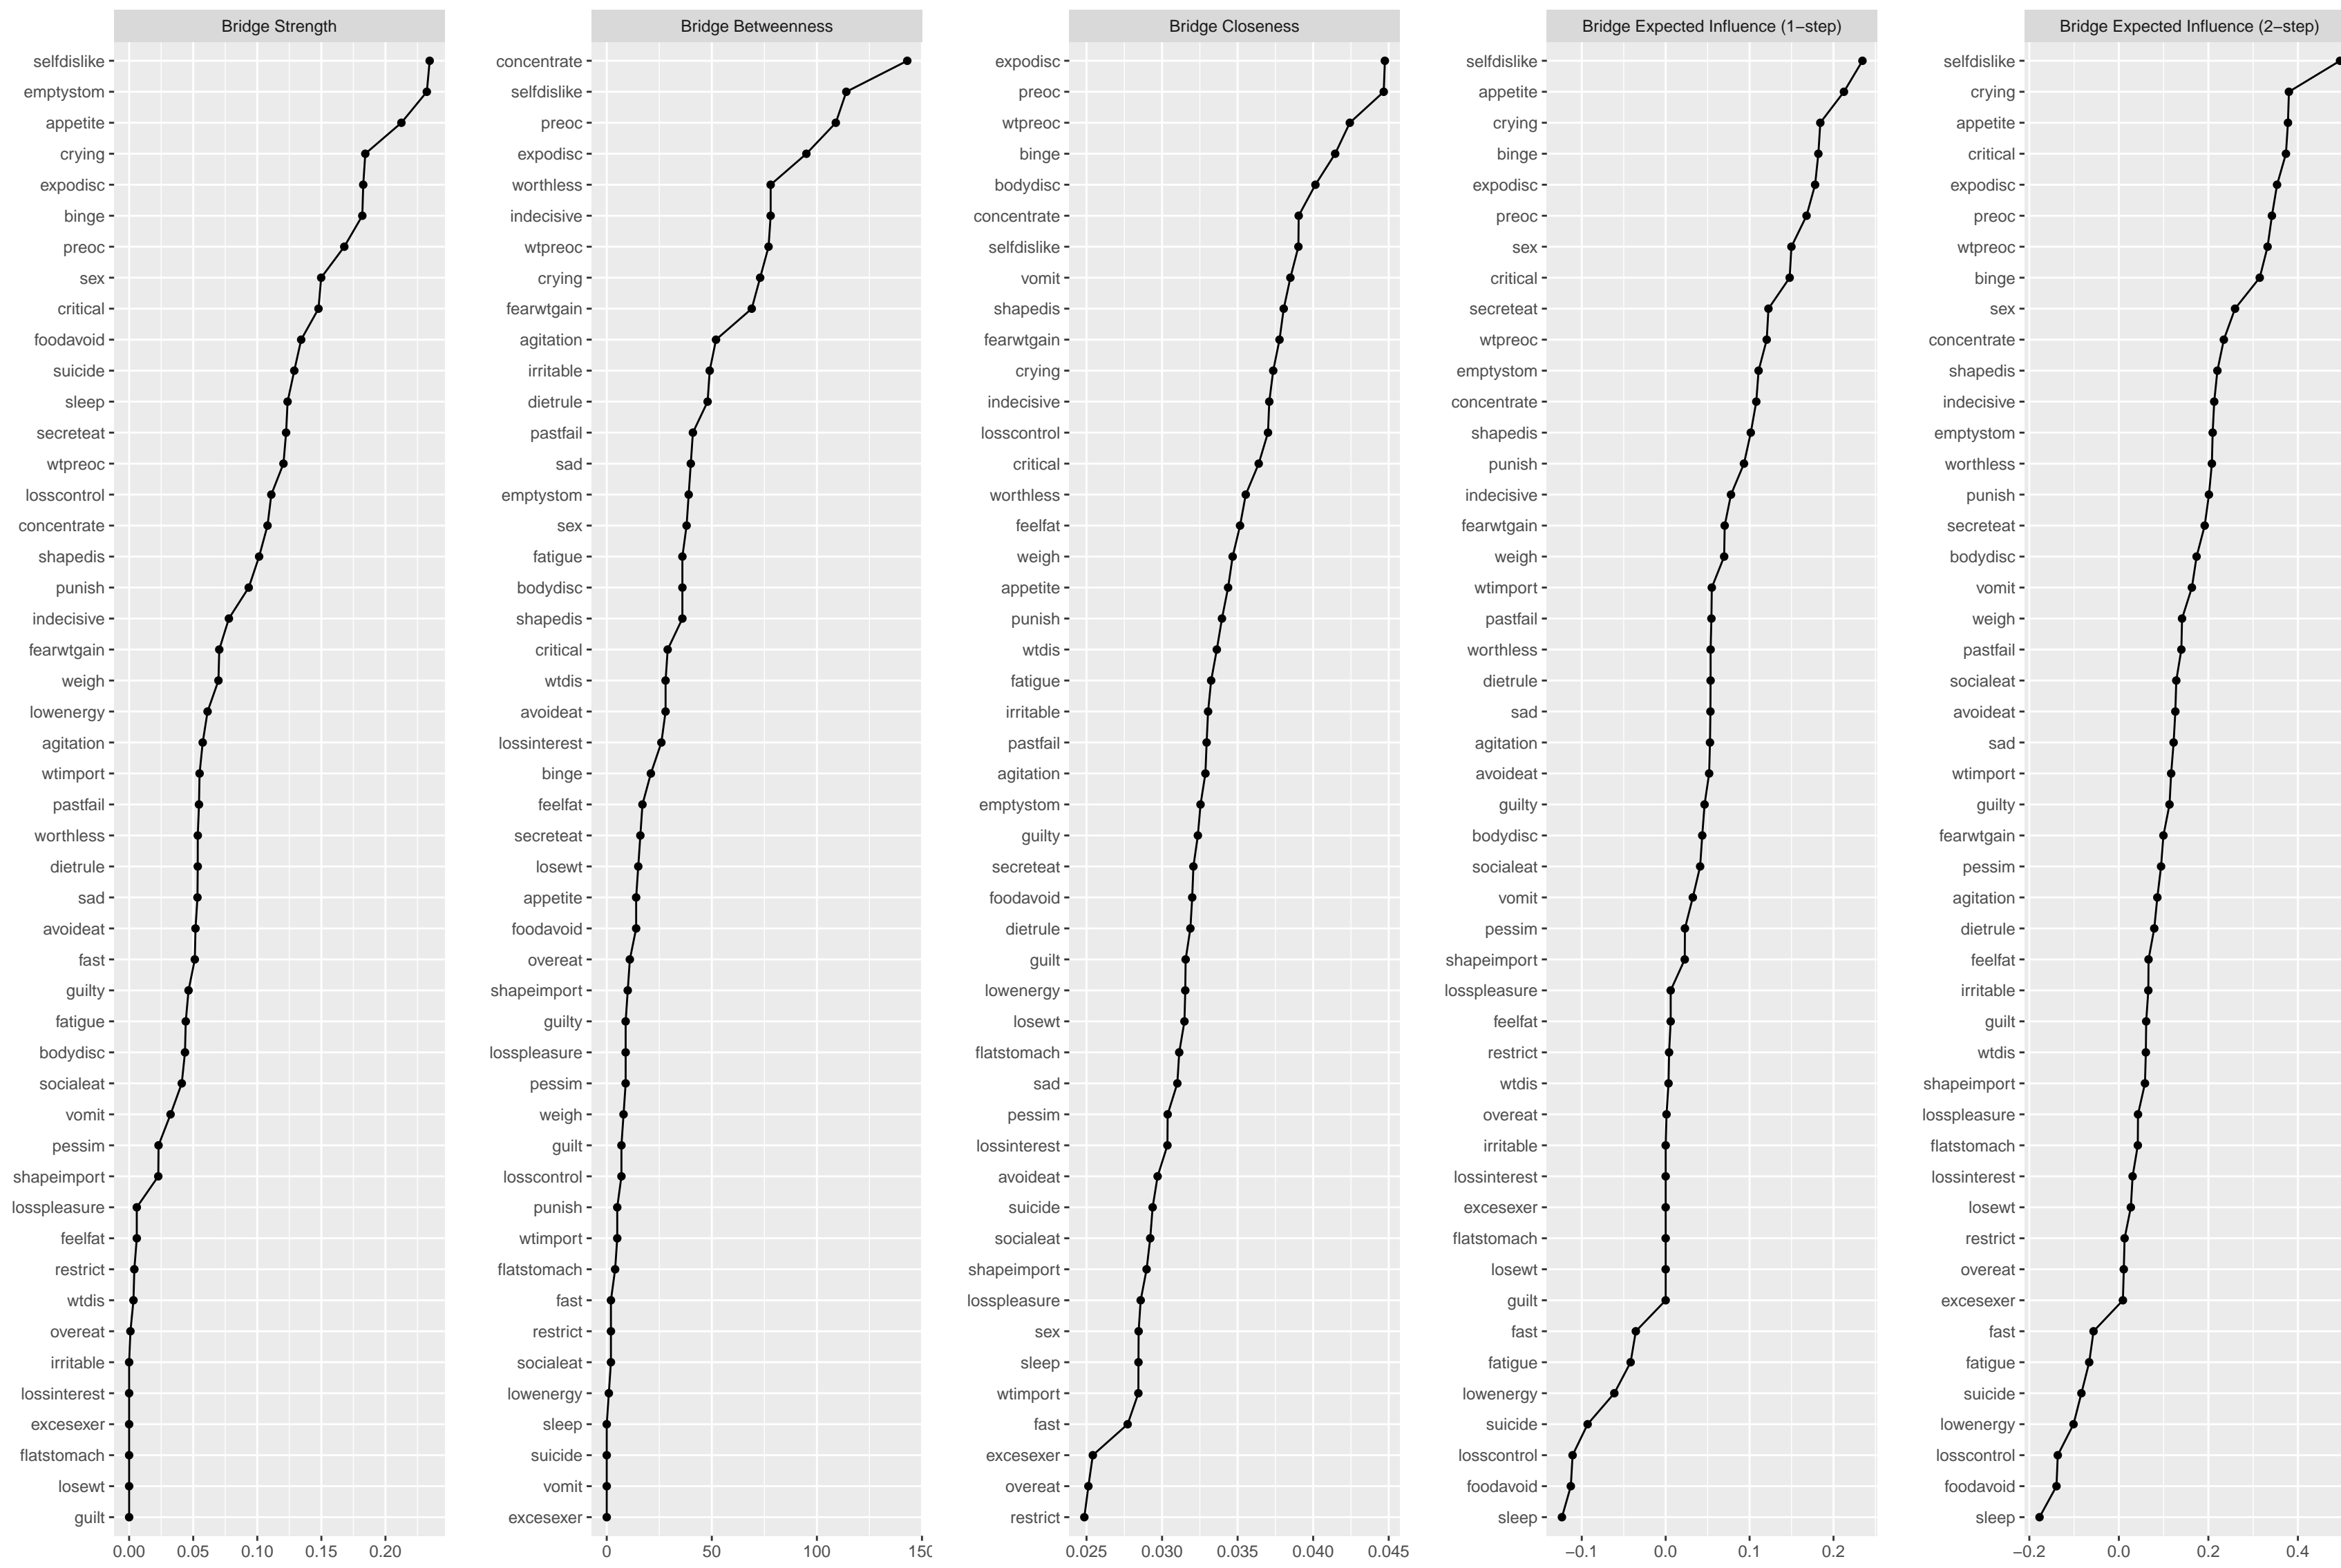

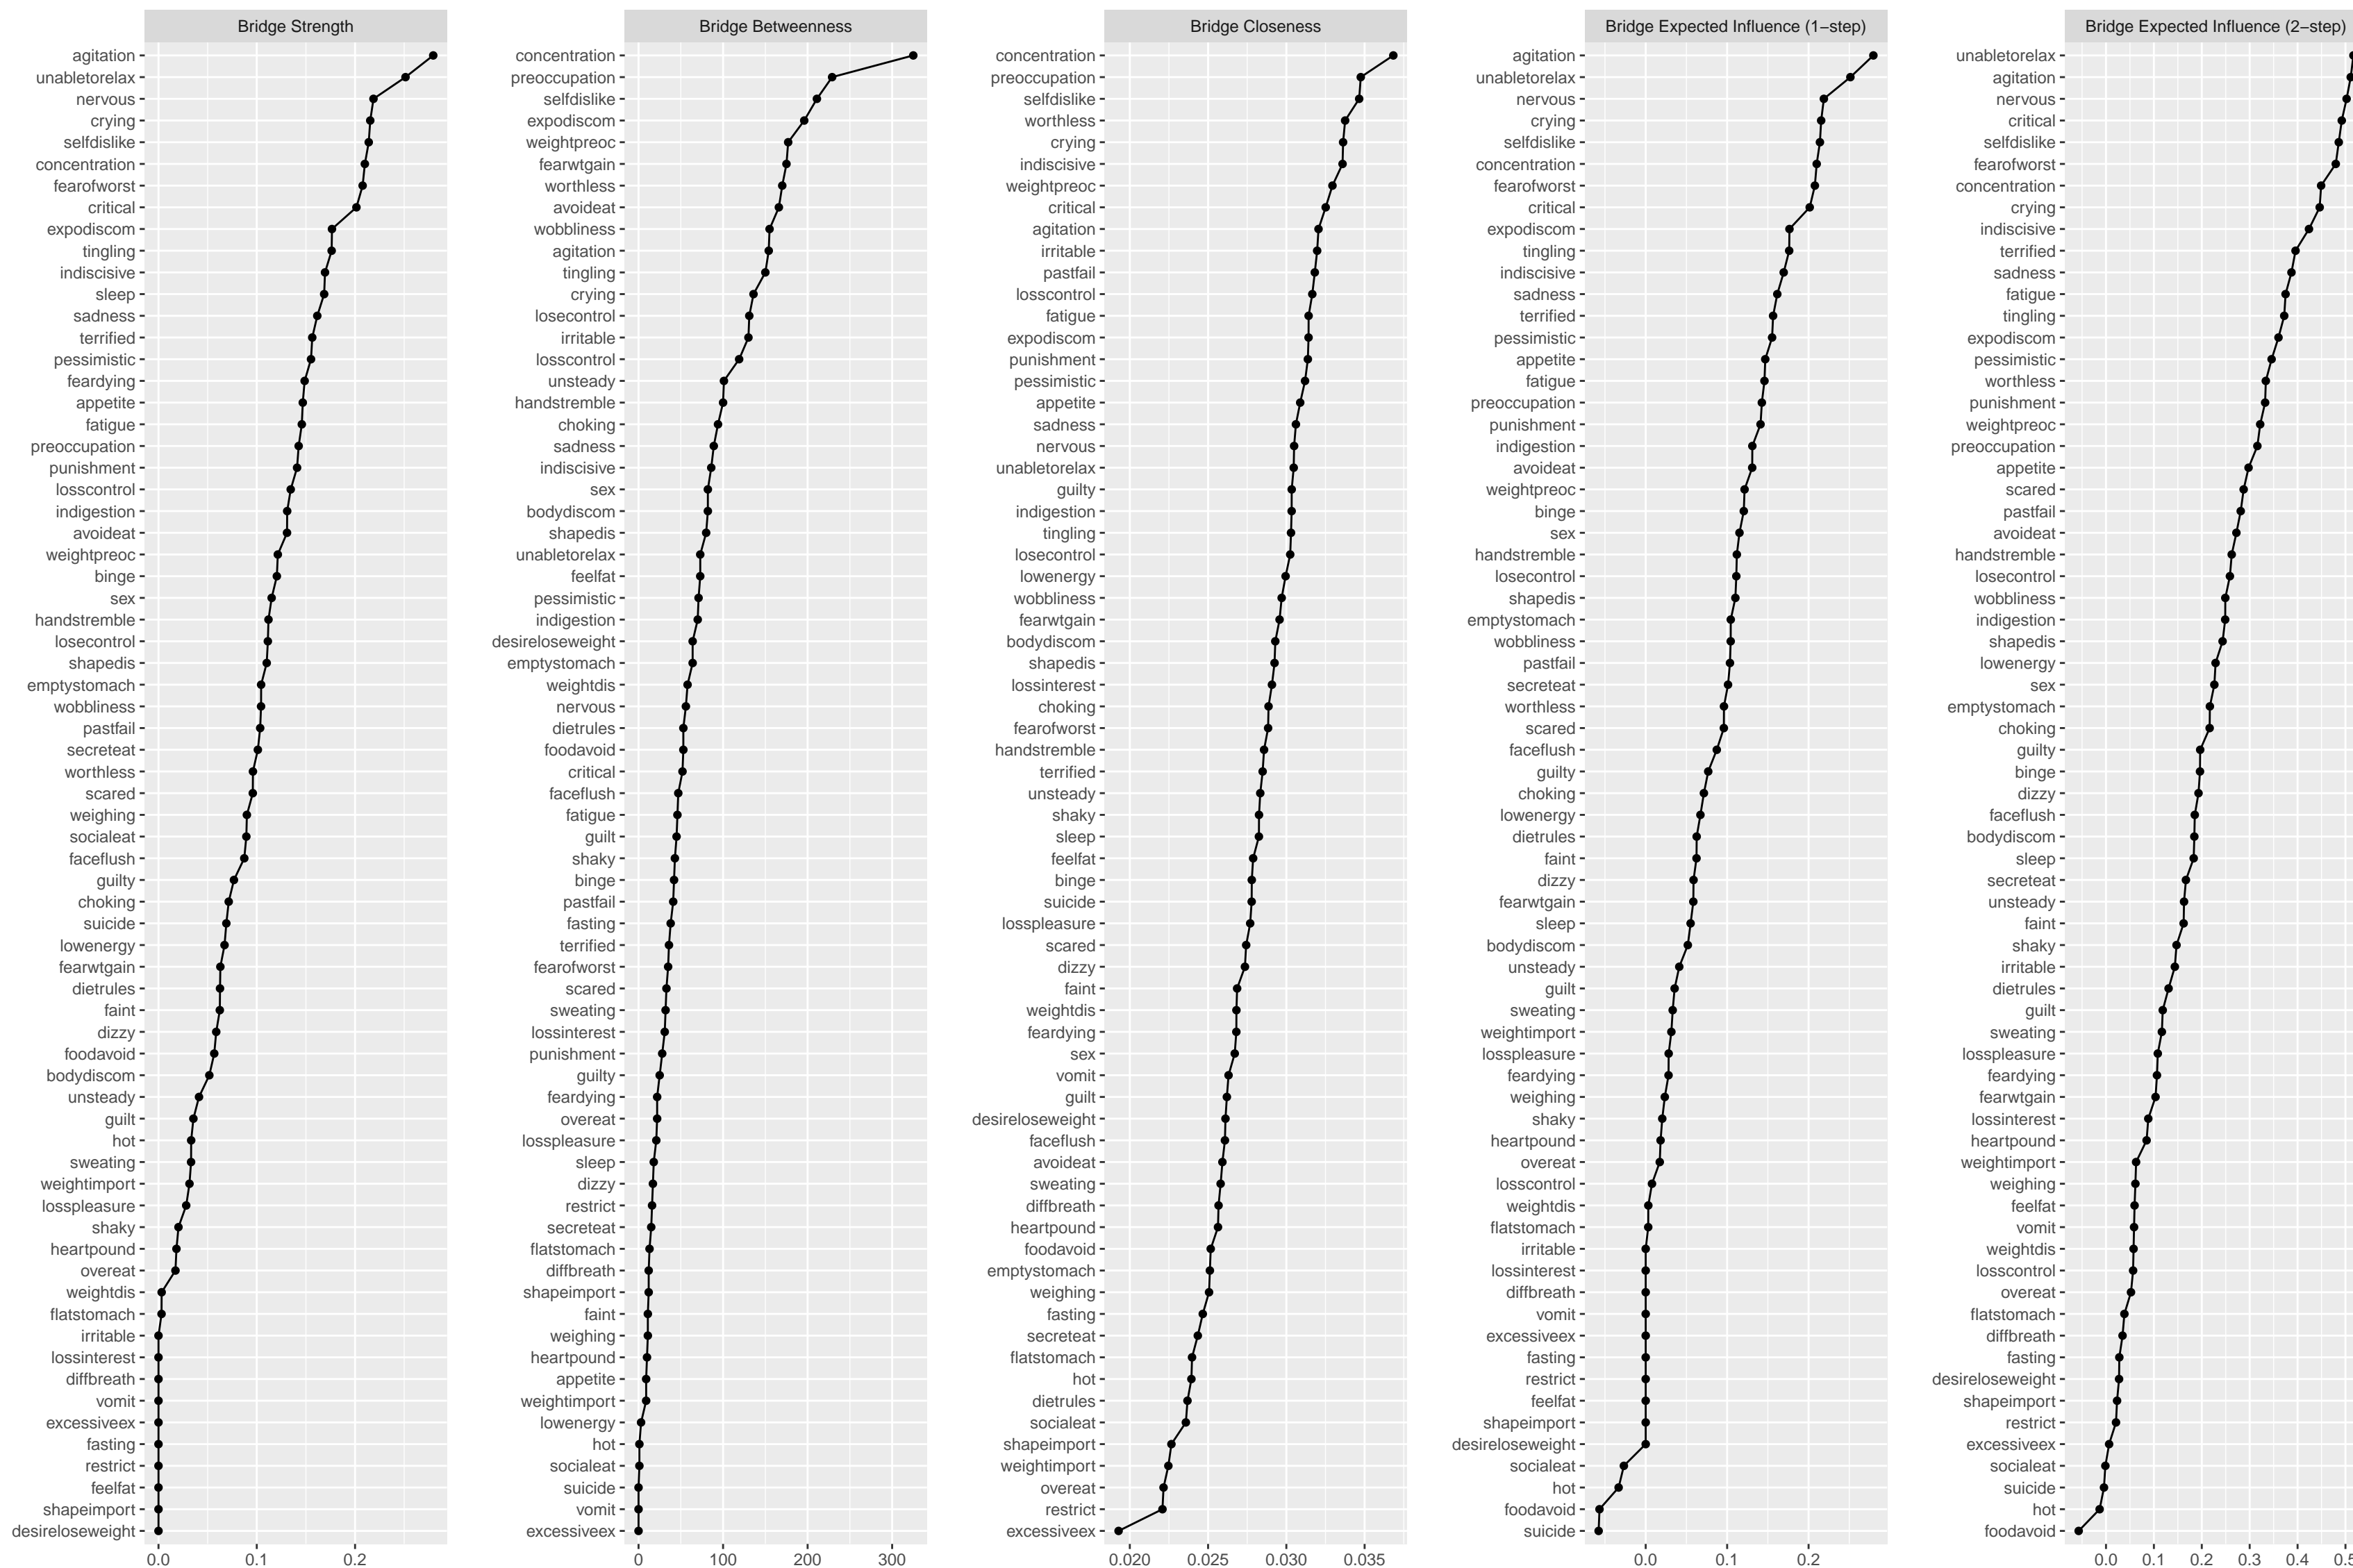



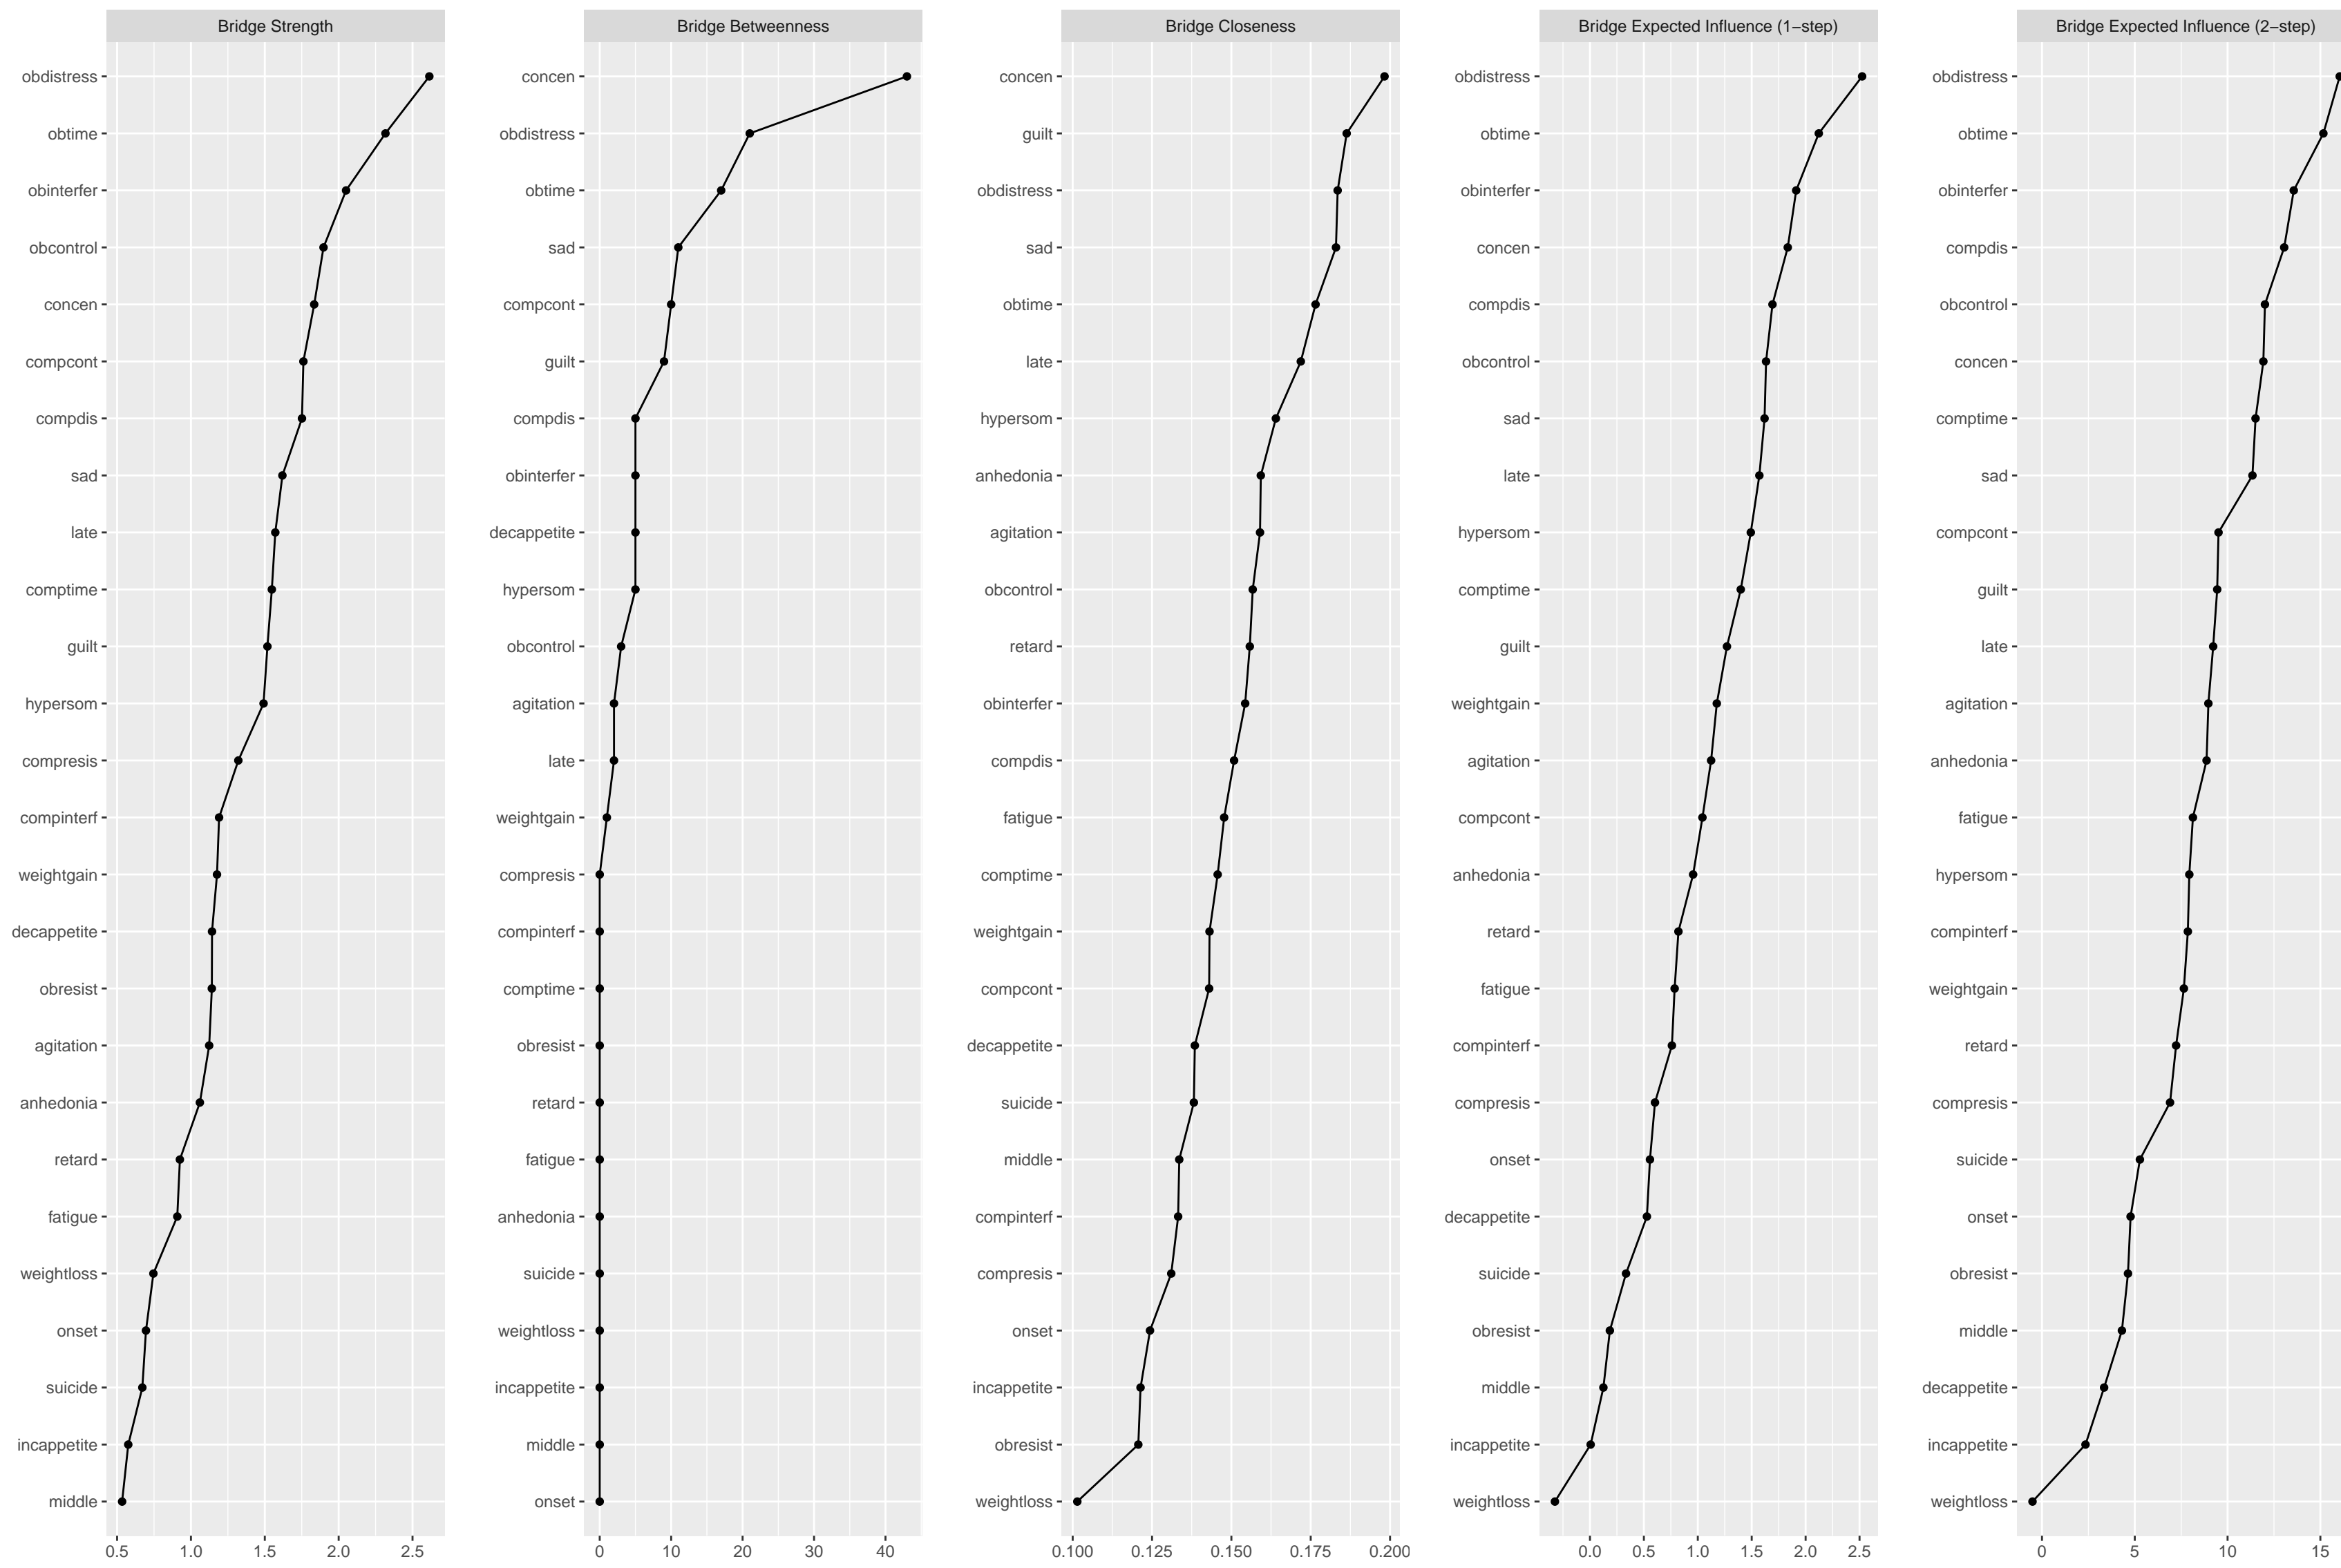

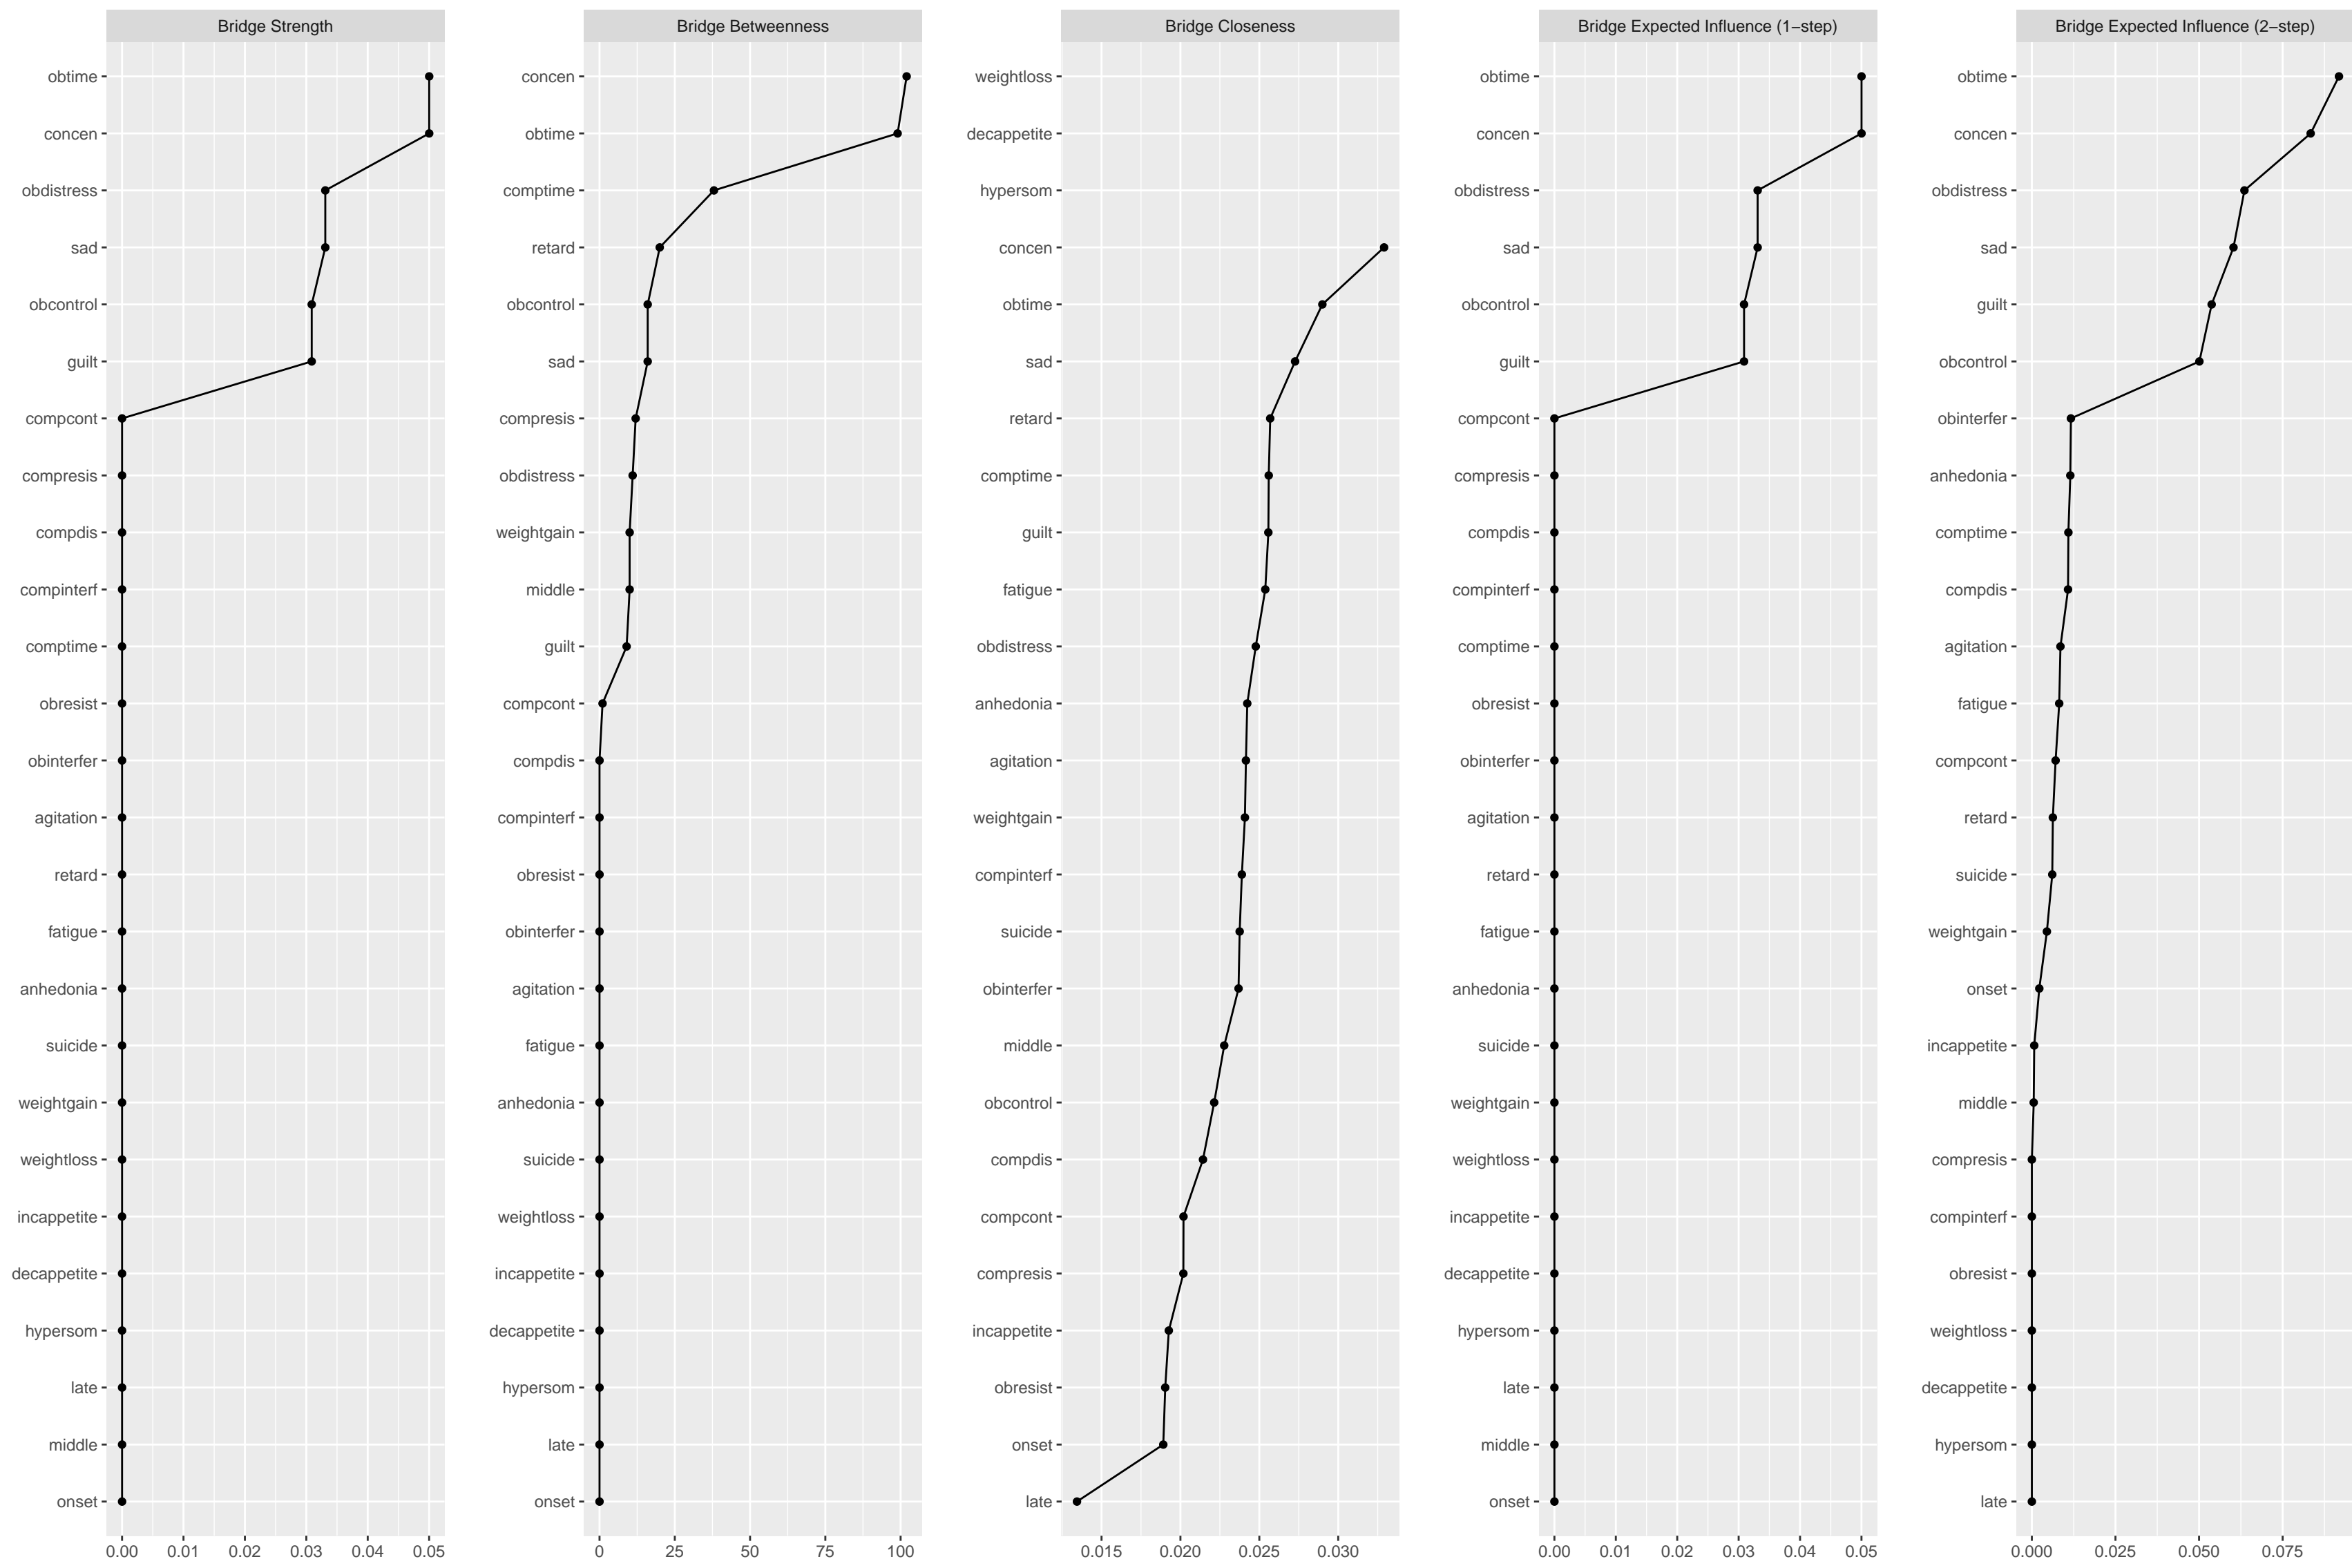

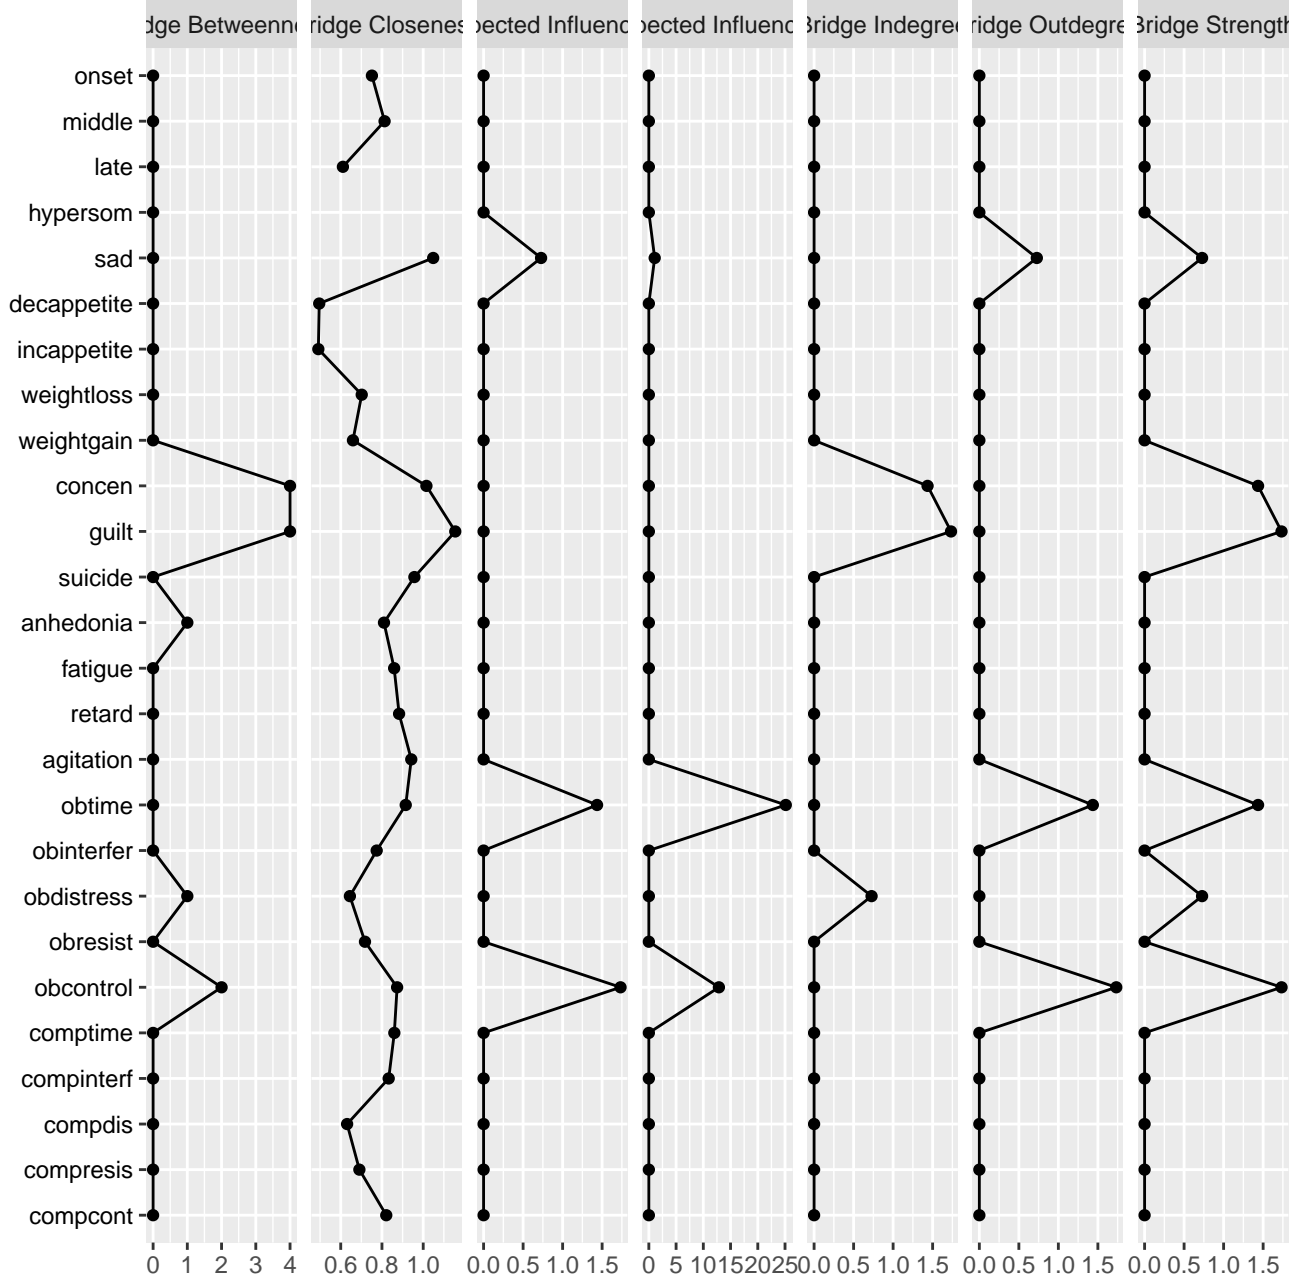

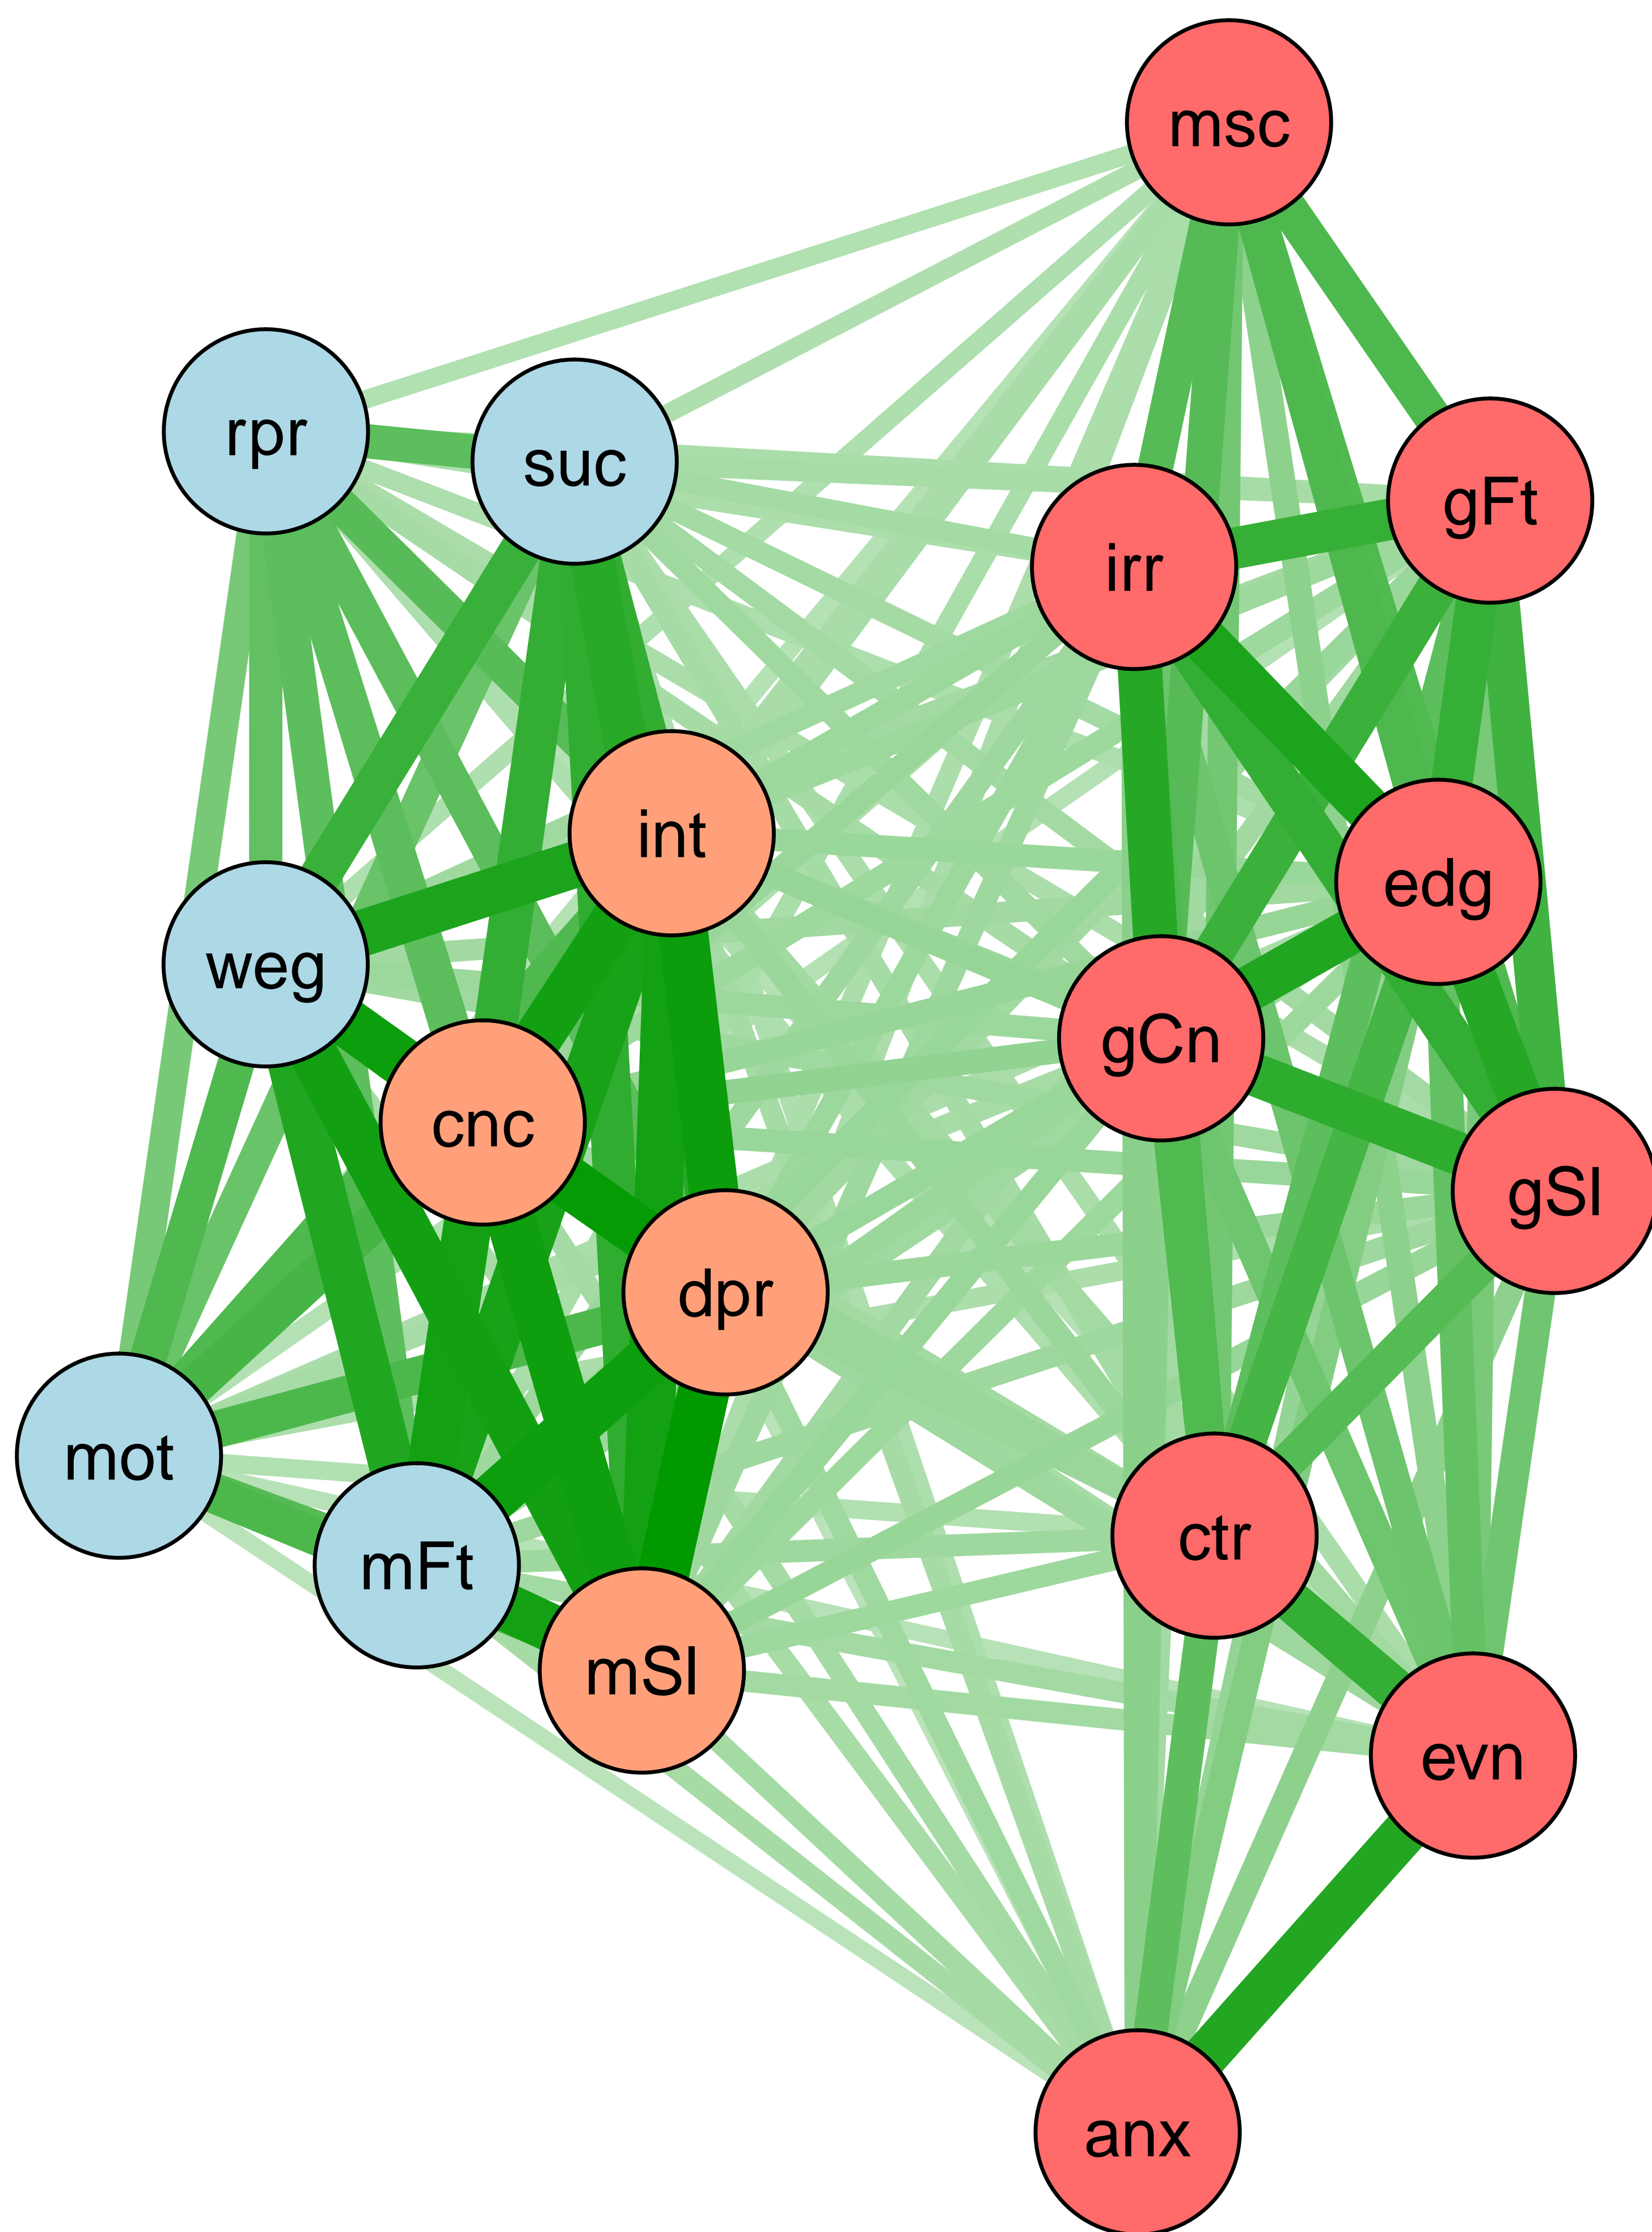

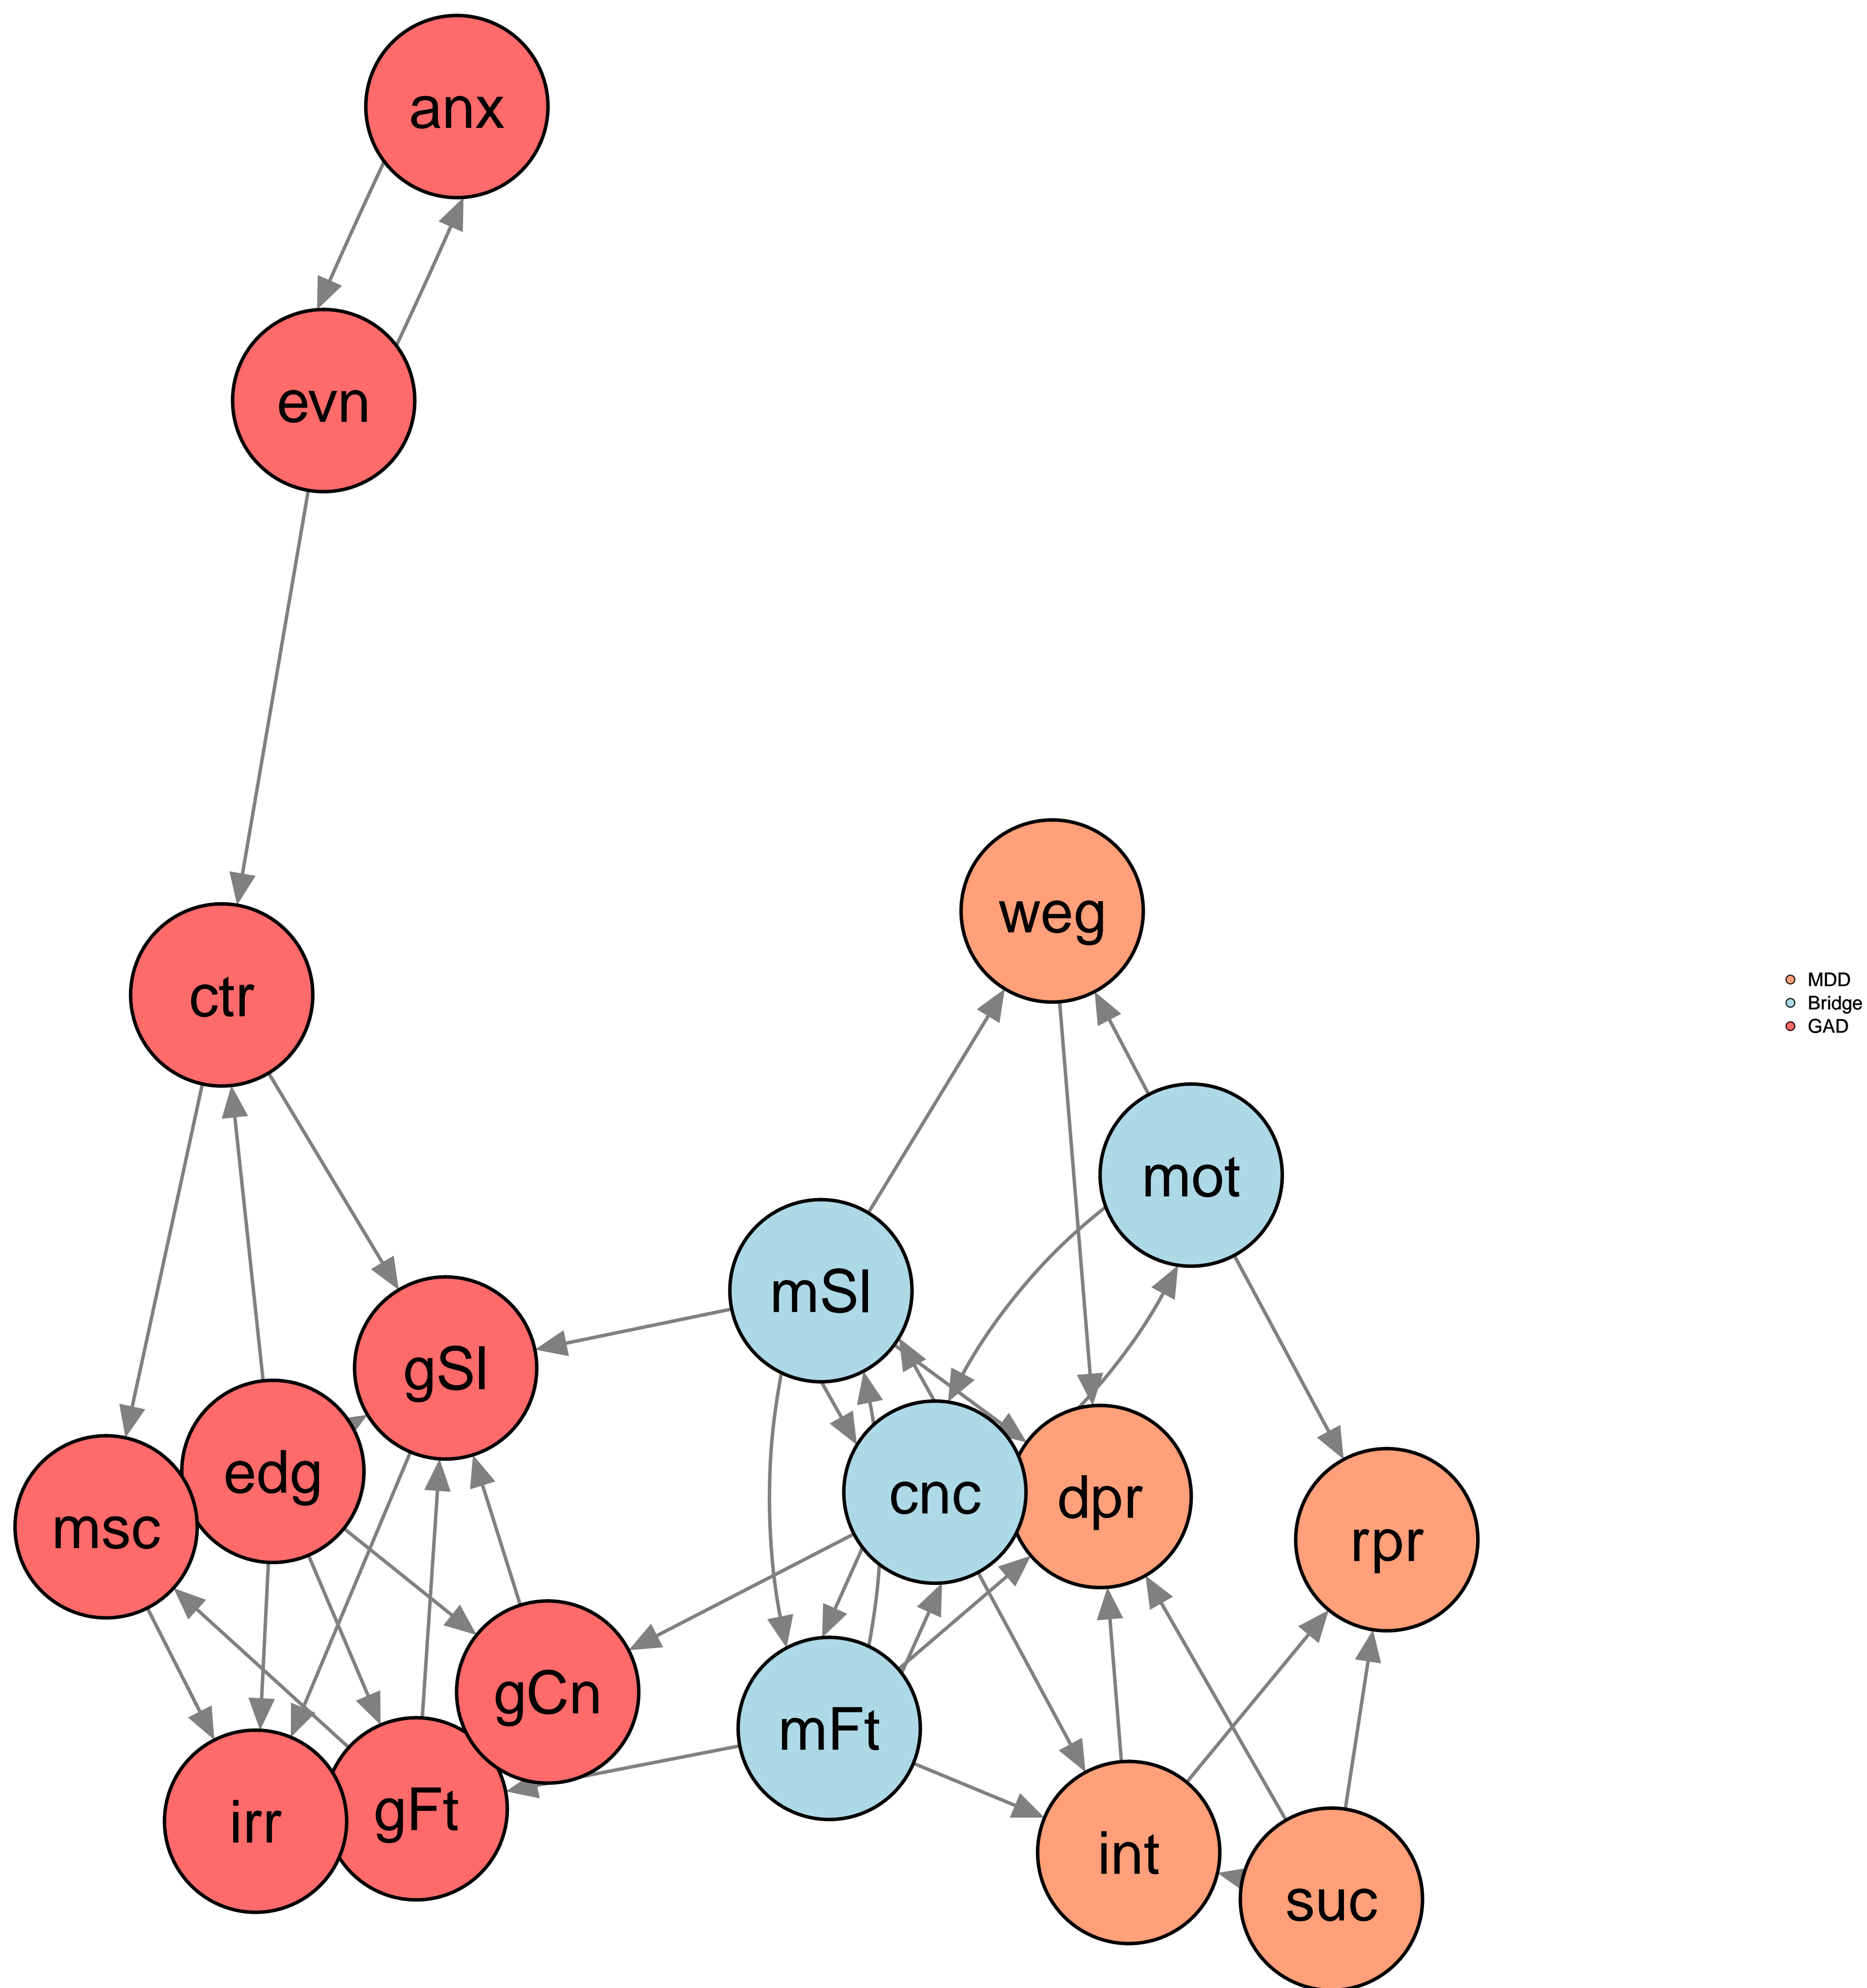

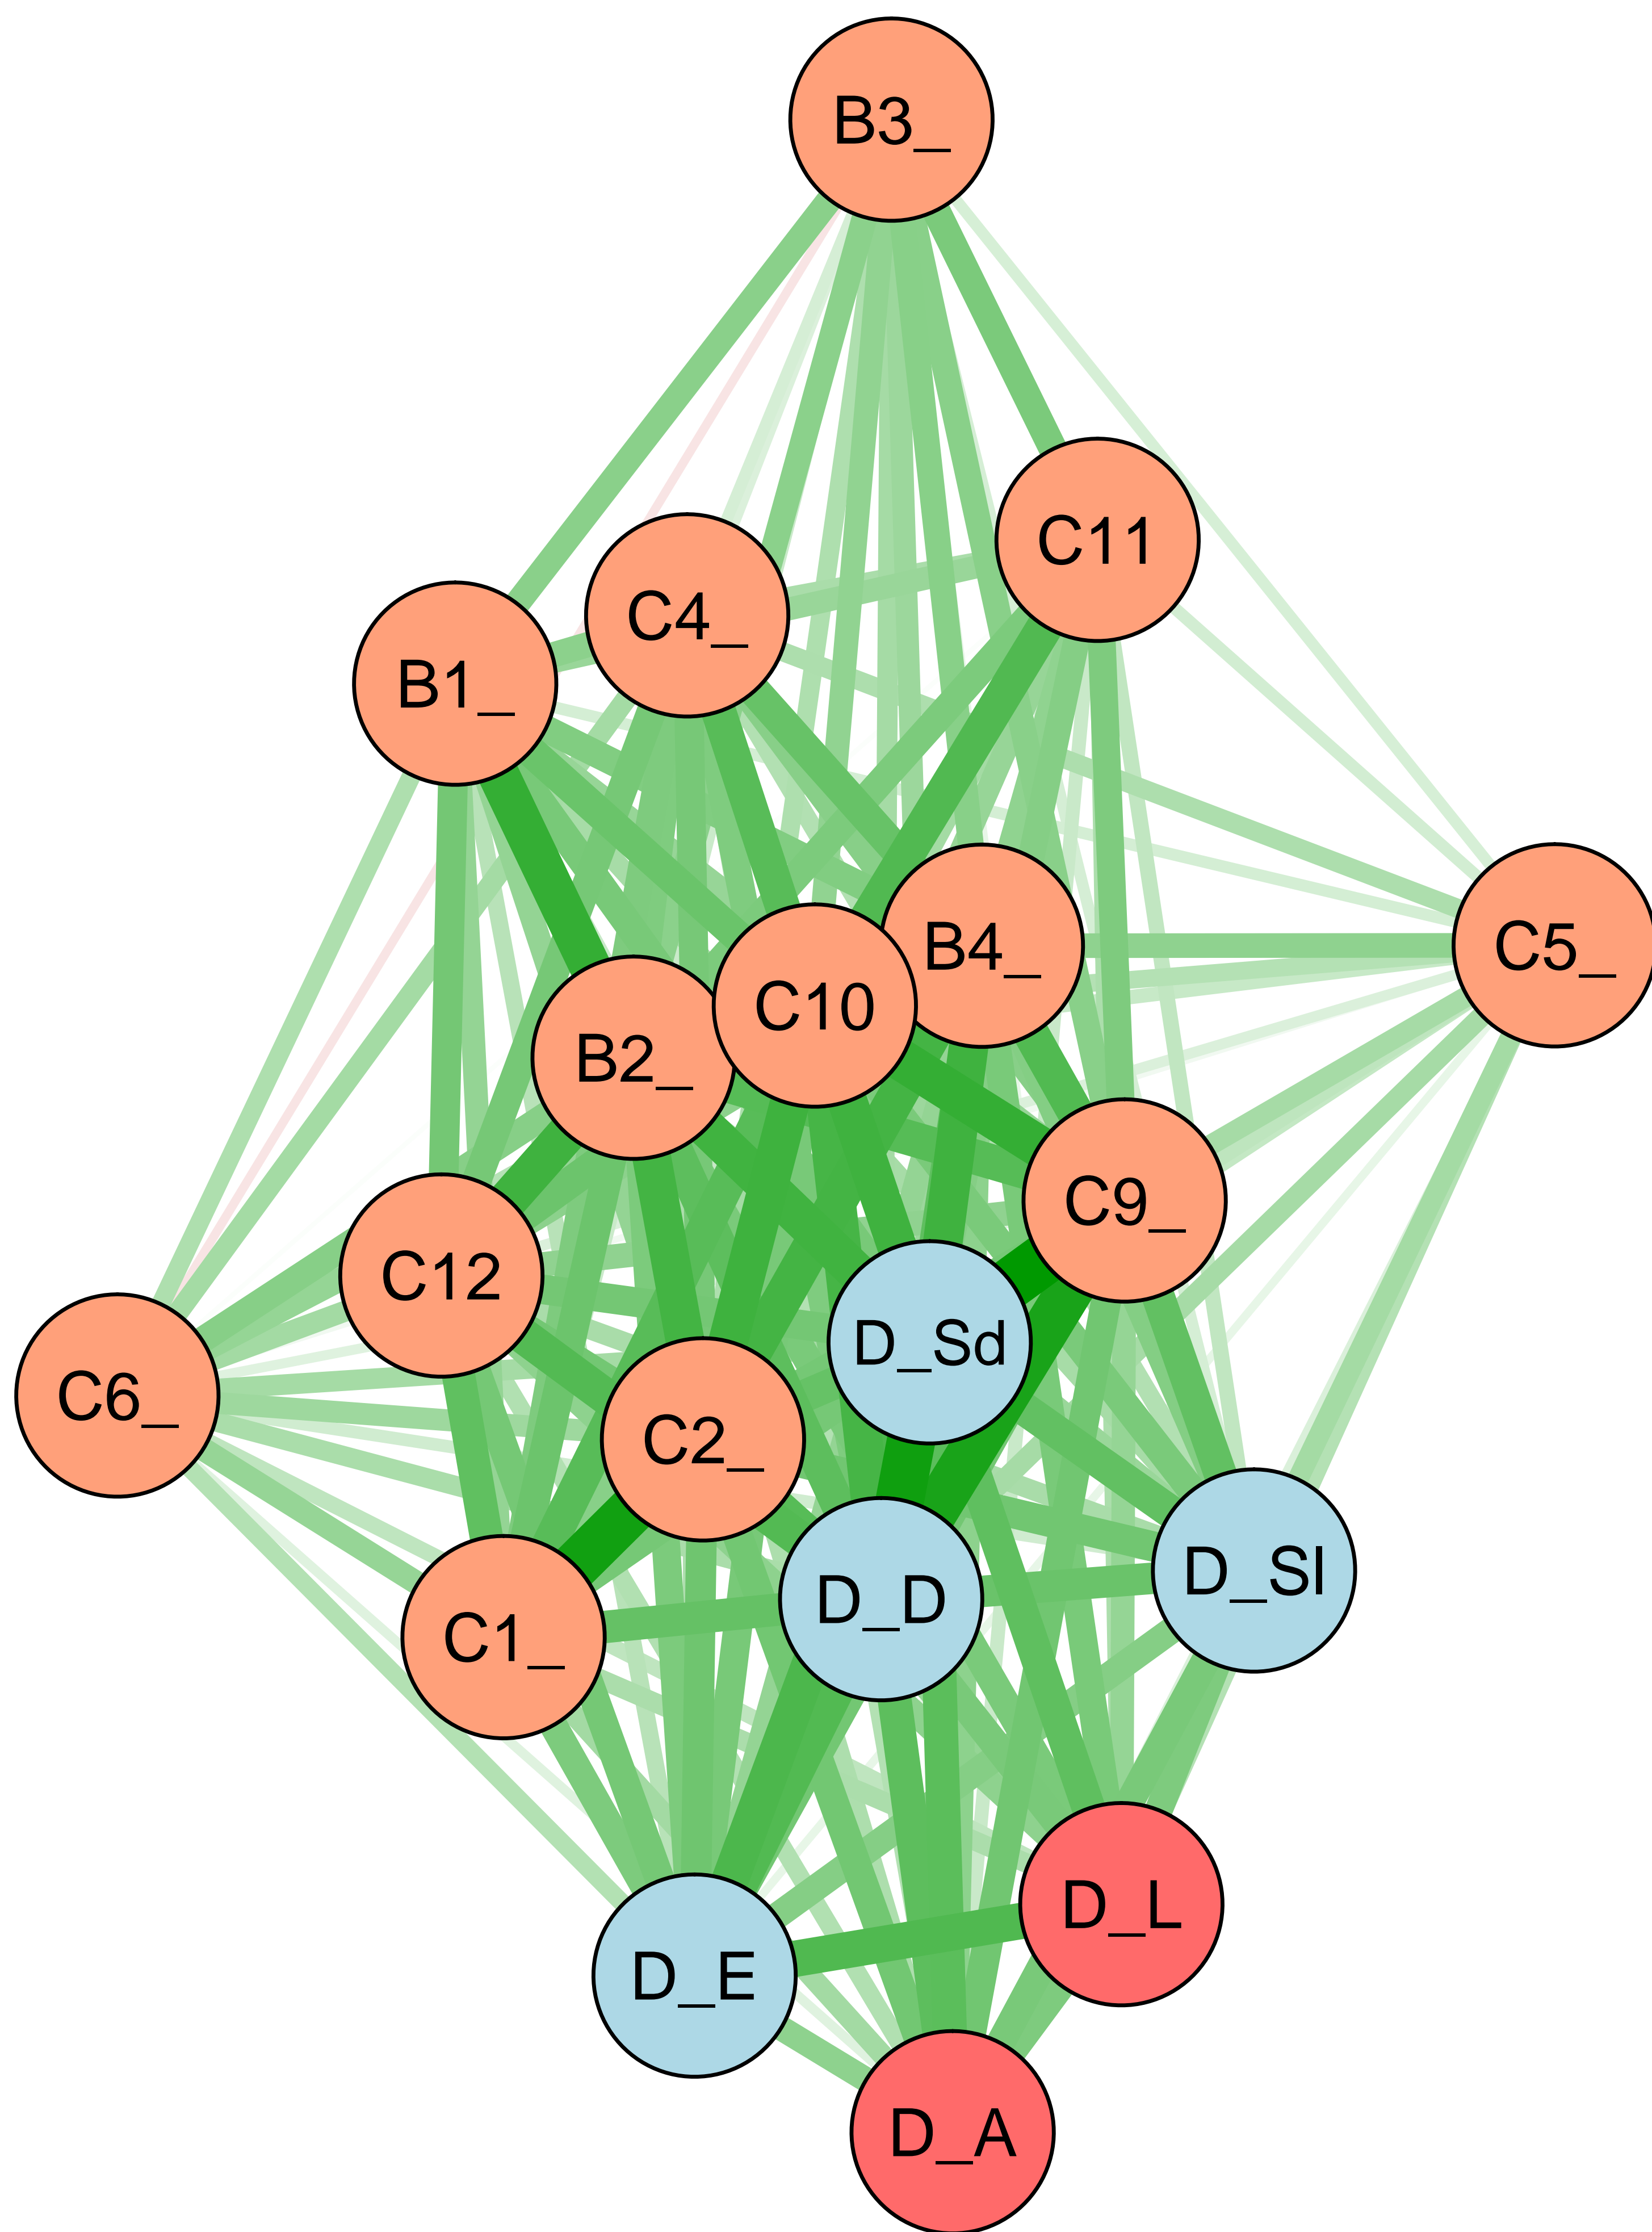

- PCBD
- Bridge
- Depression



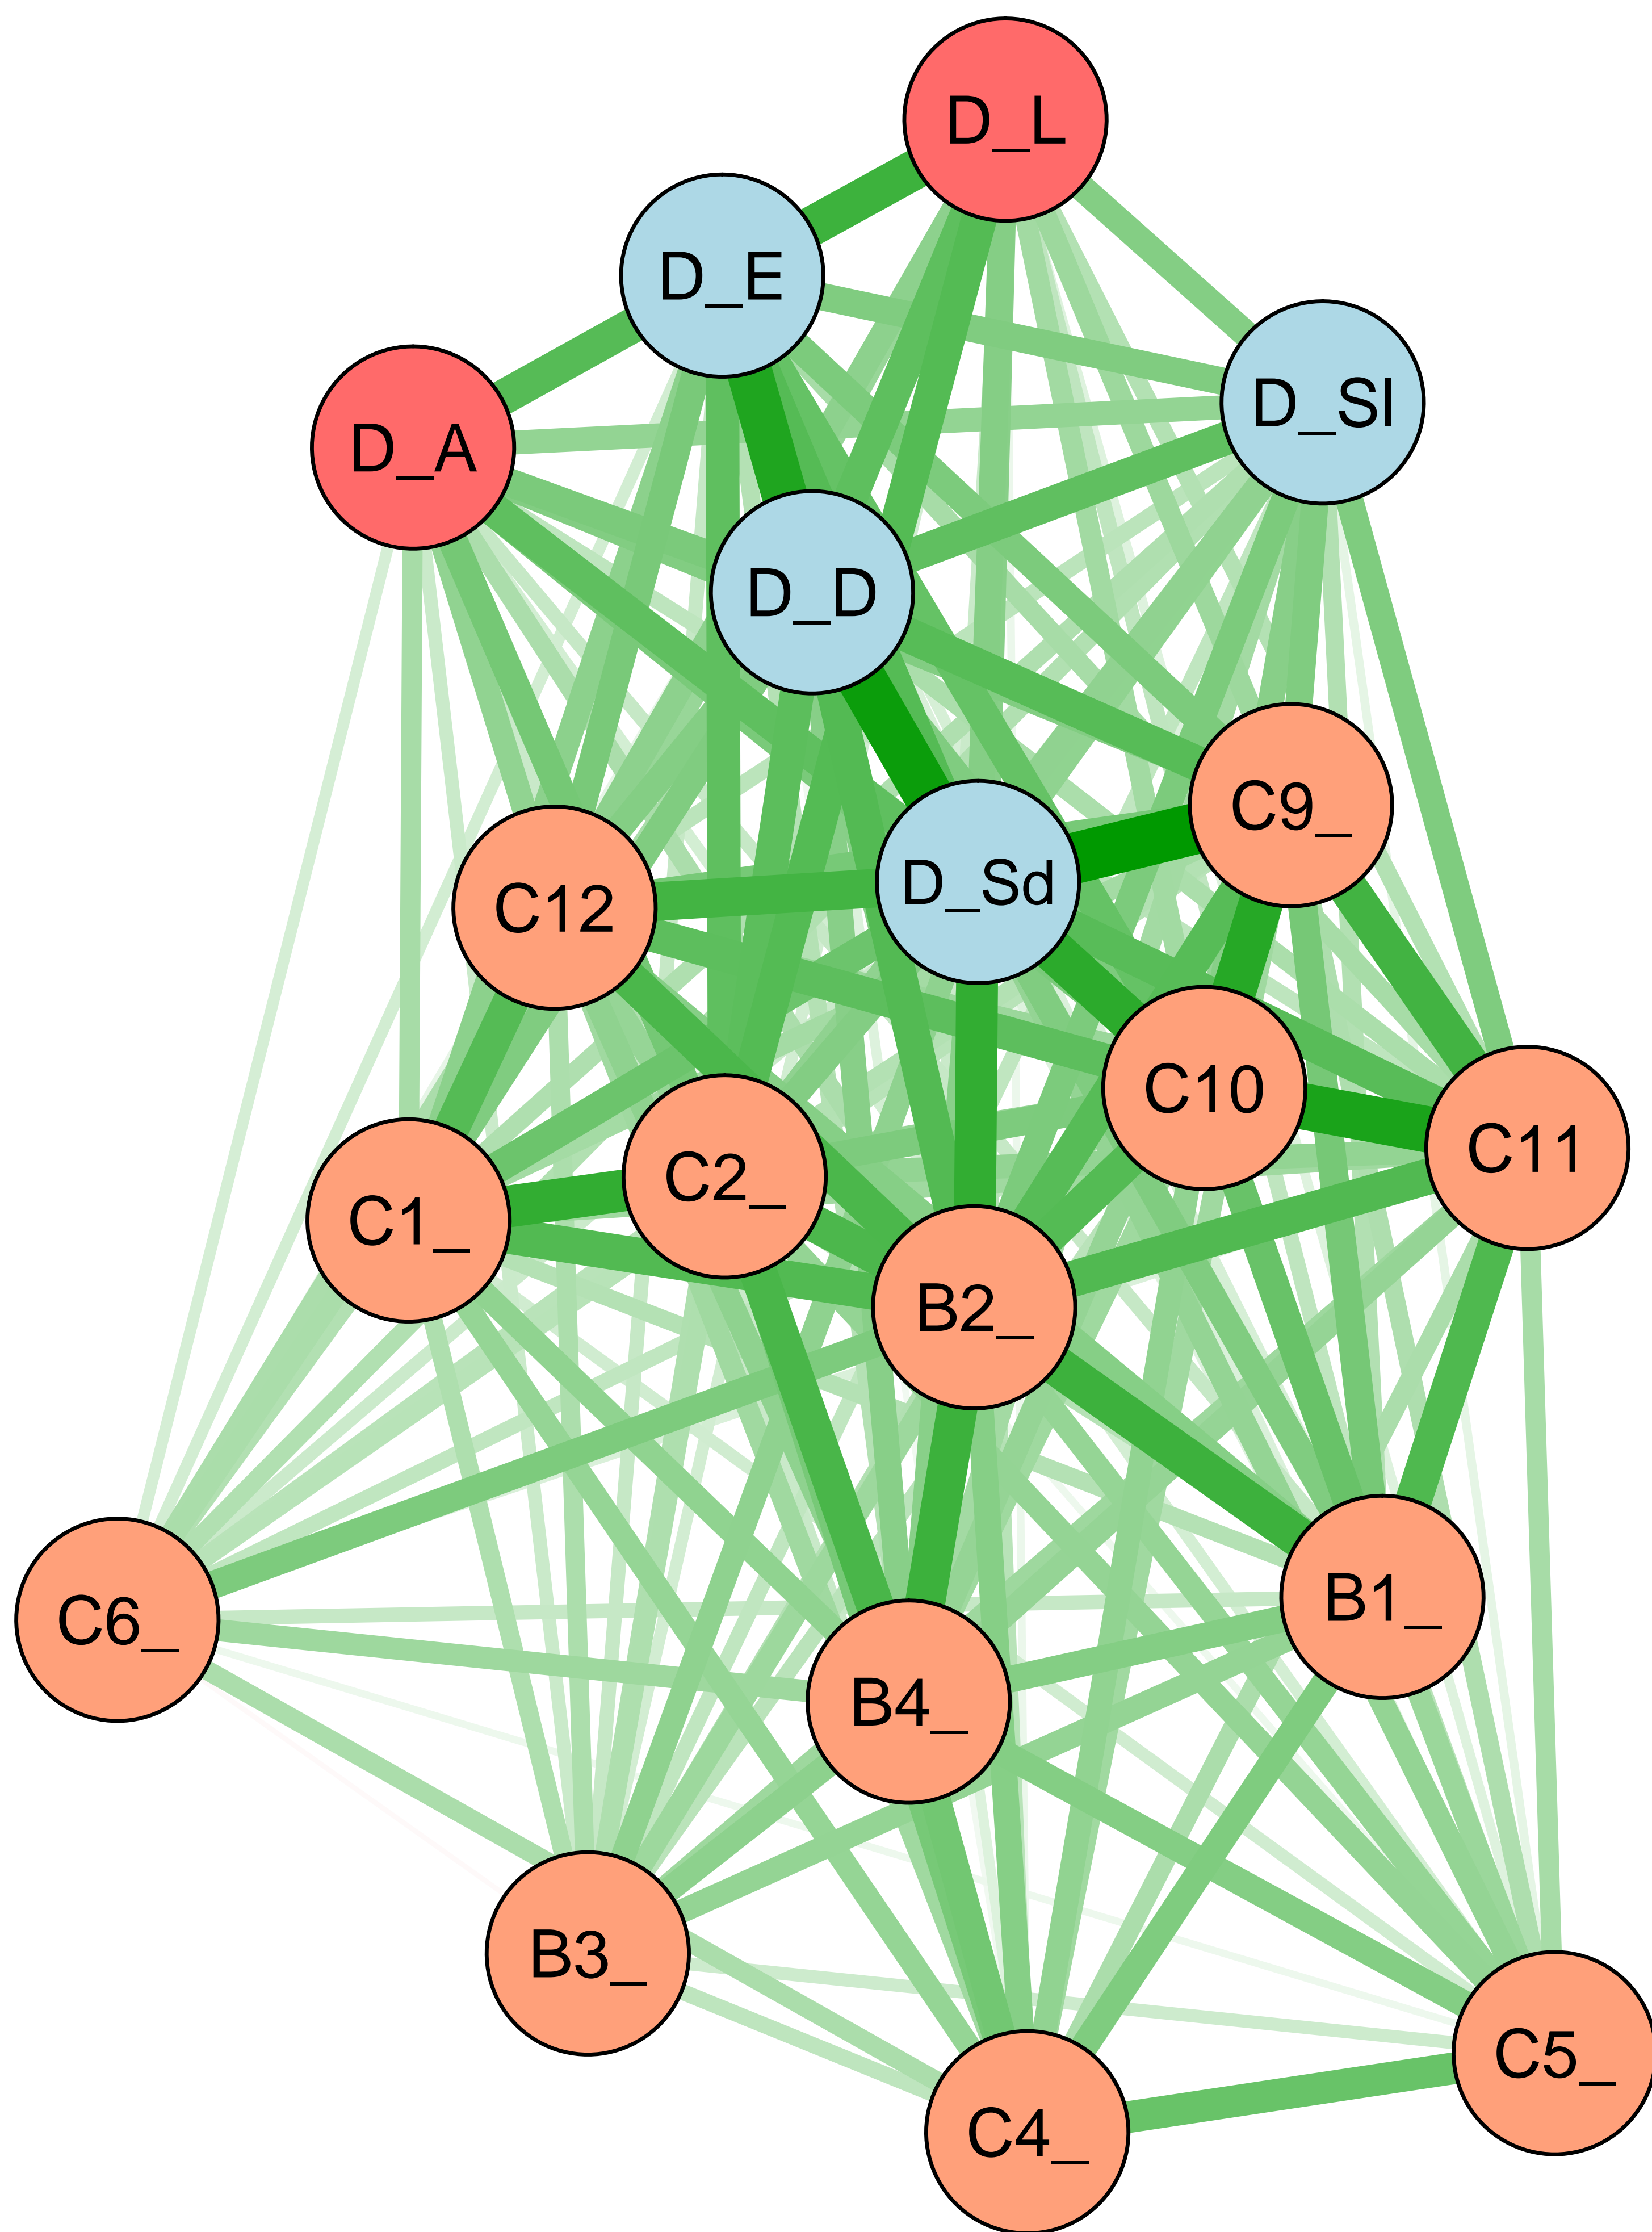

- PCBD
- Bridge
- Depression

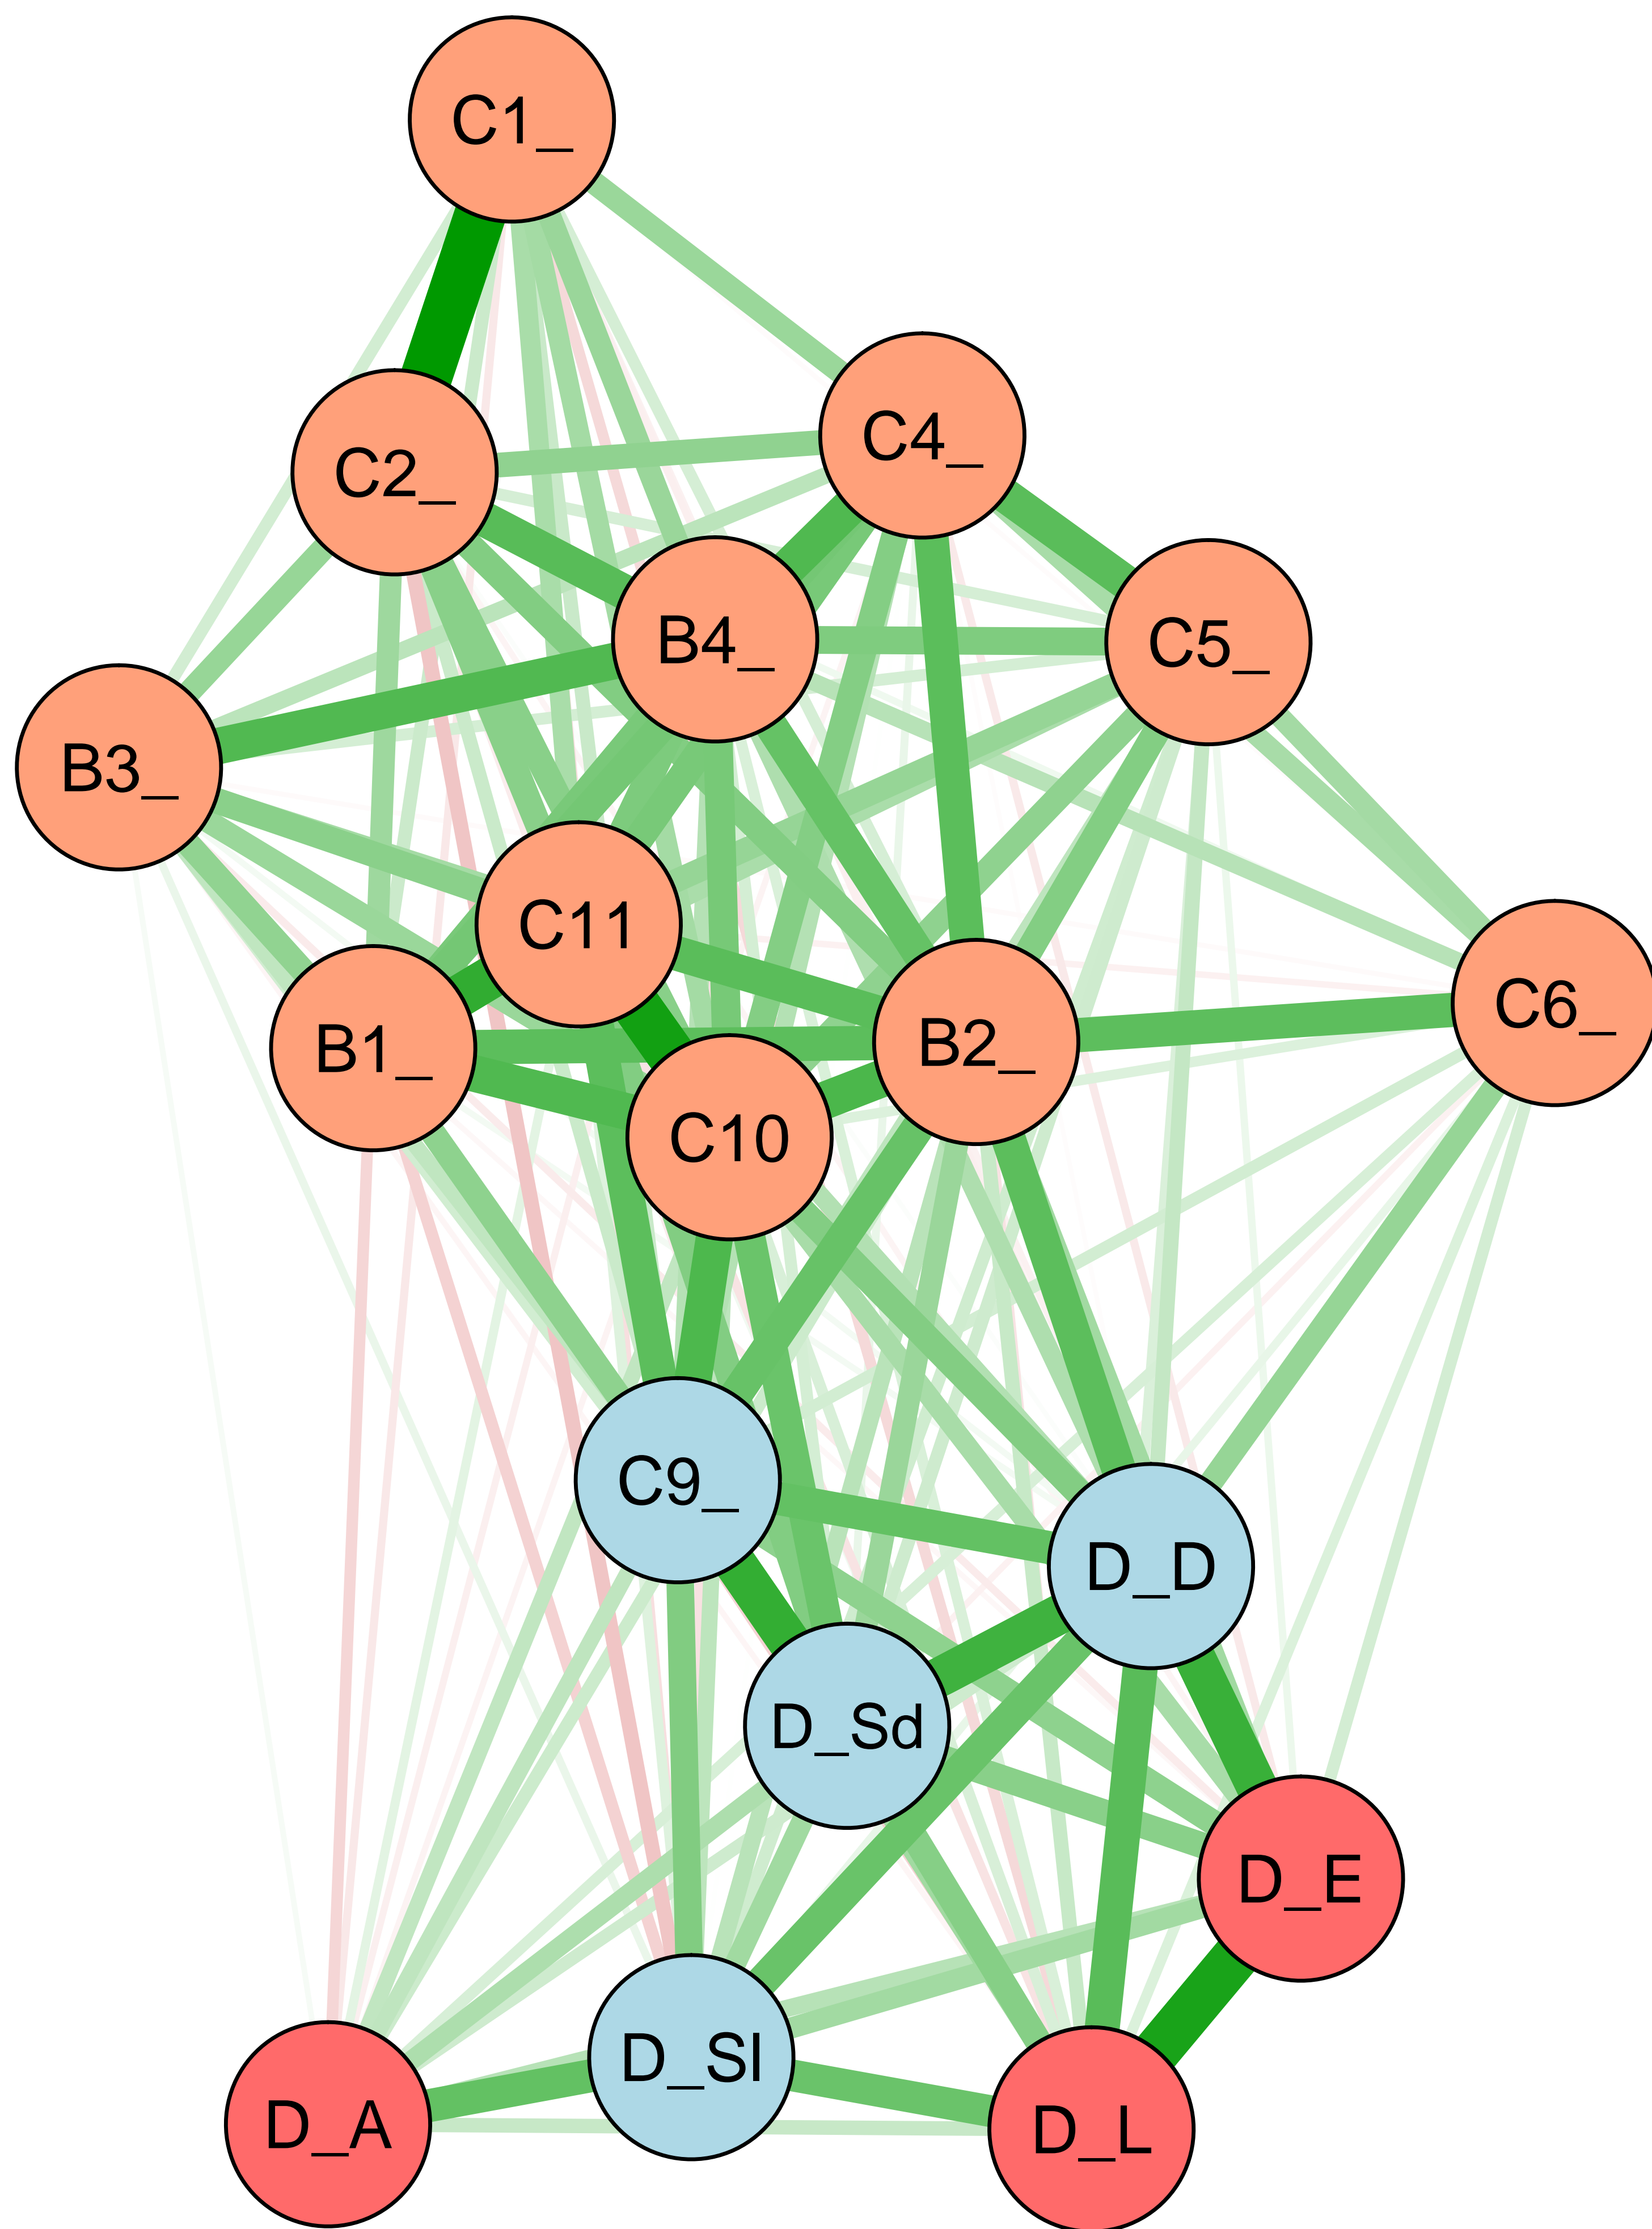

- PCBD
- Bridge
- Depression



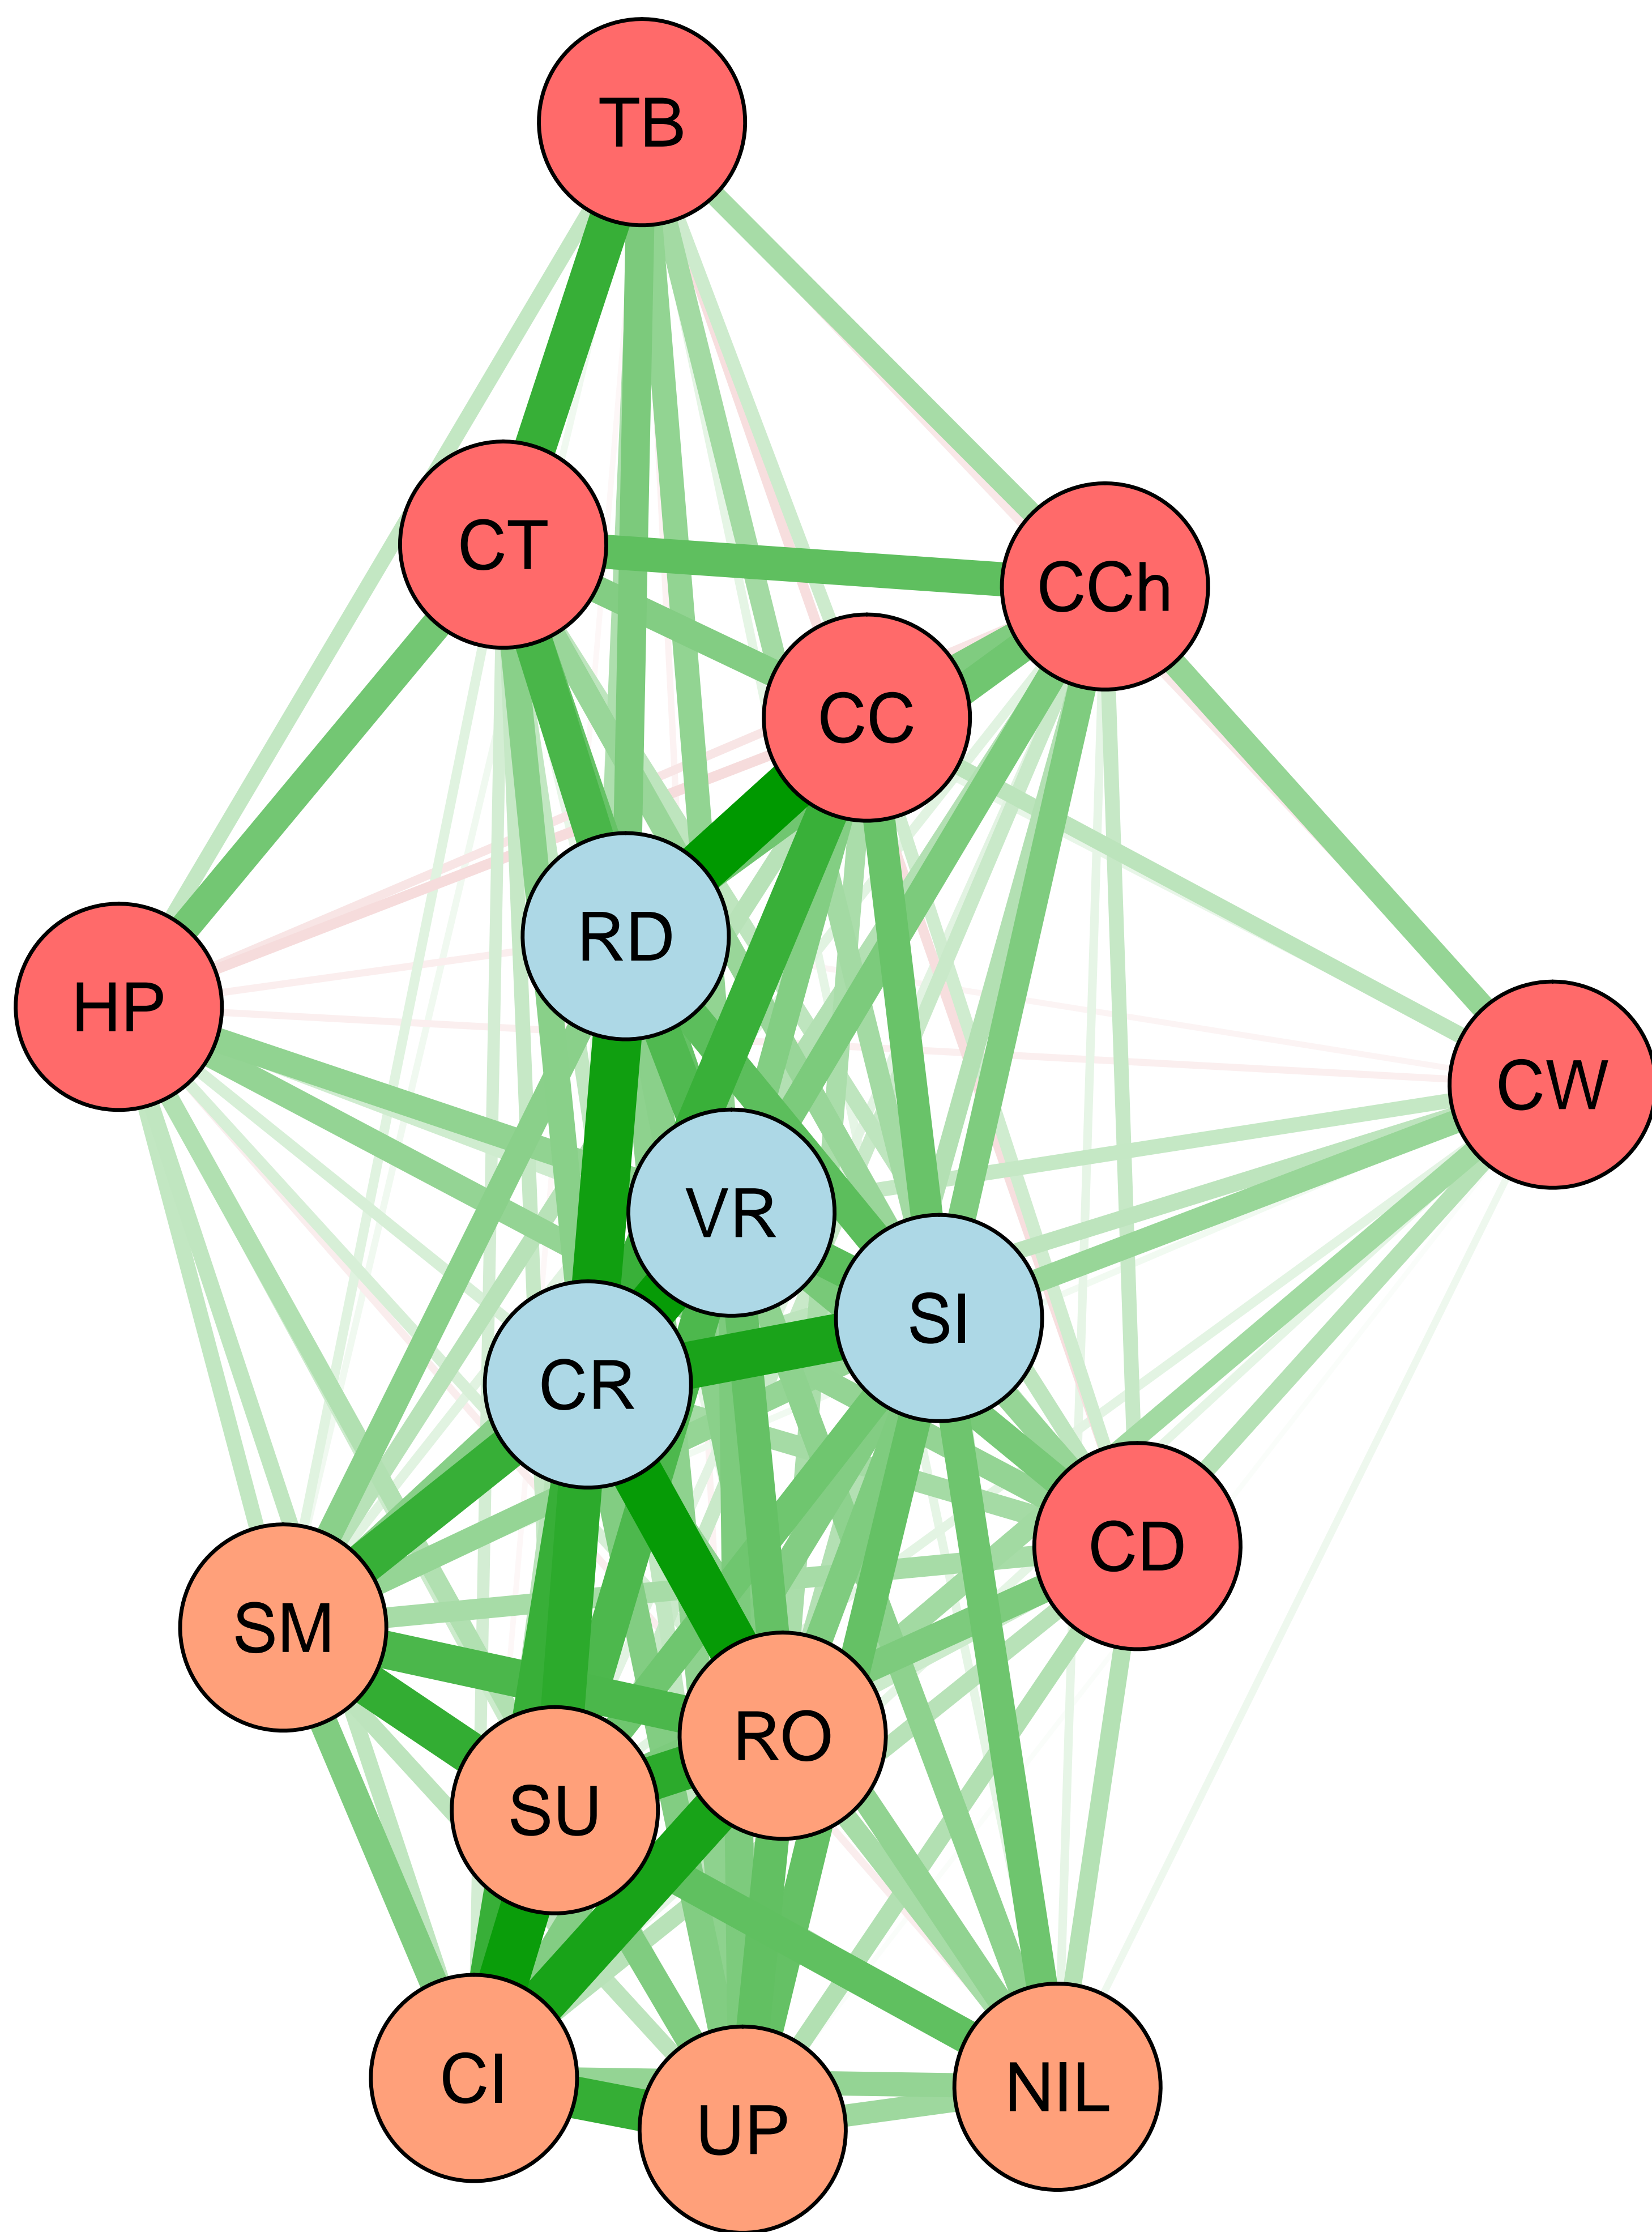

- Autism
- Bridge
- OCD

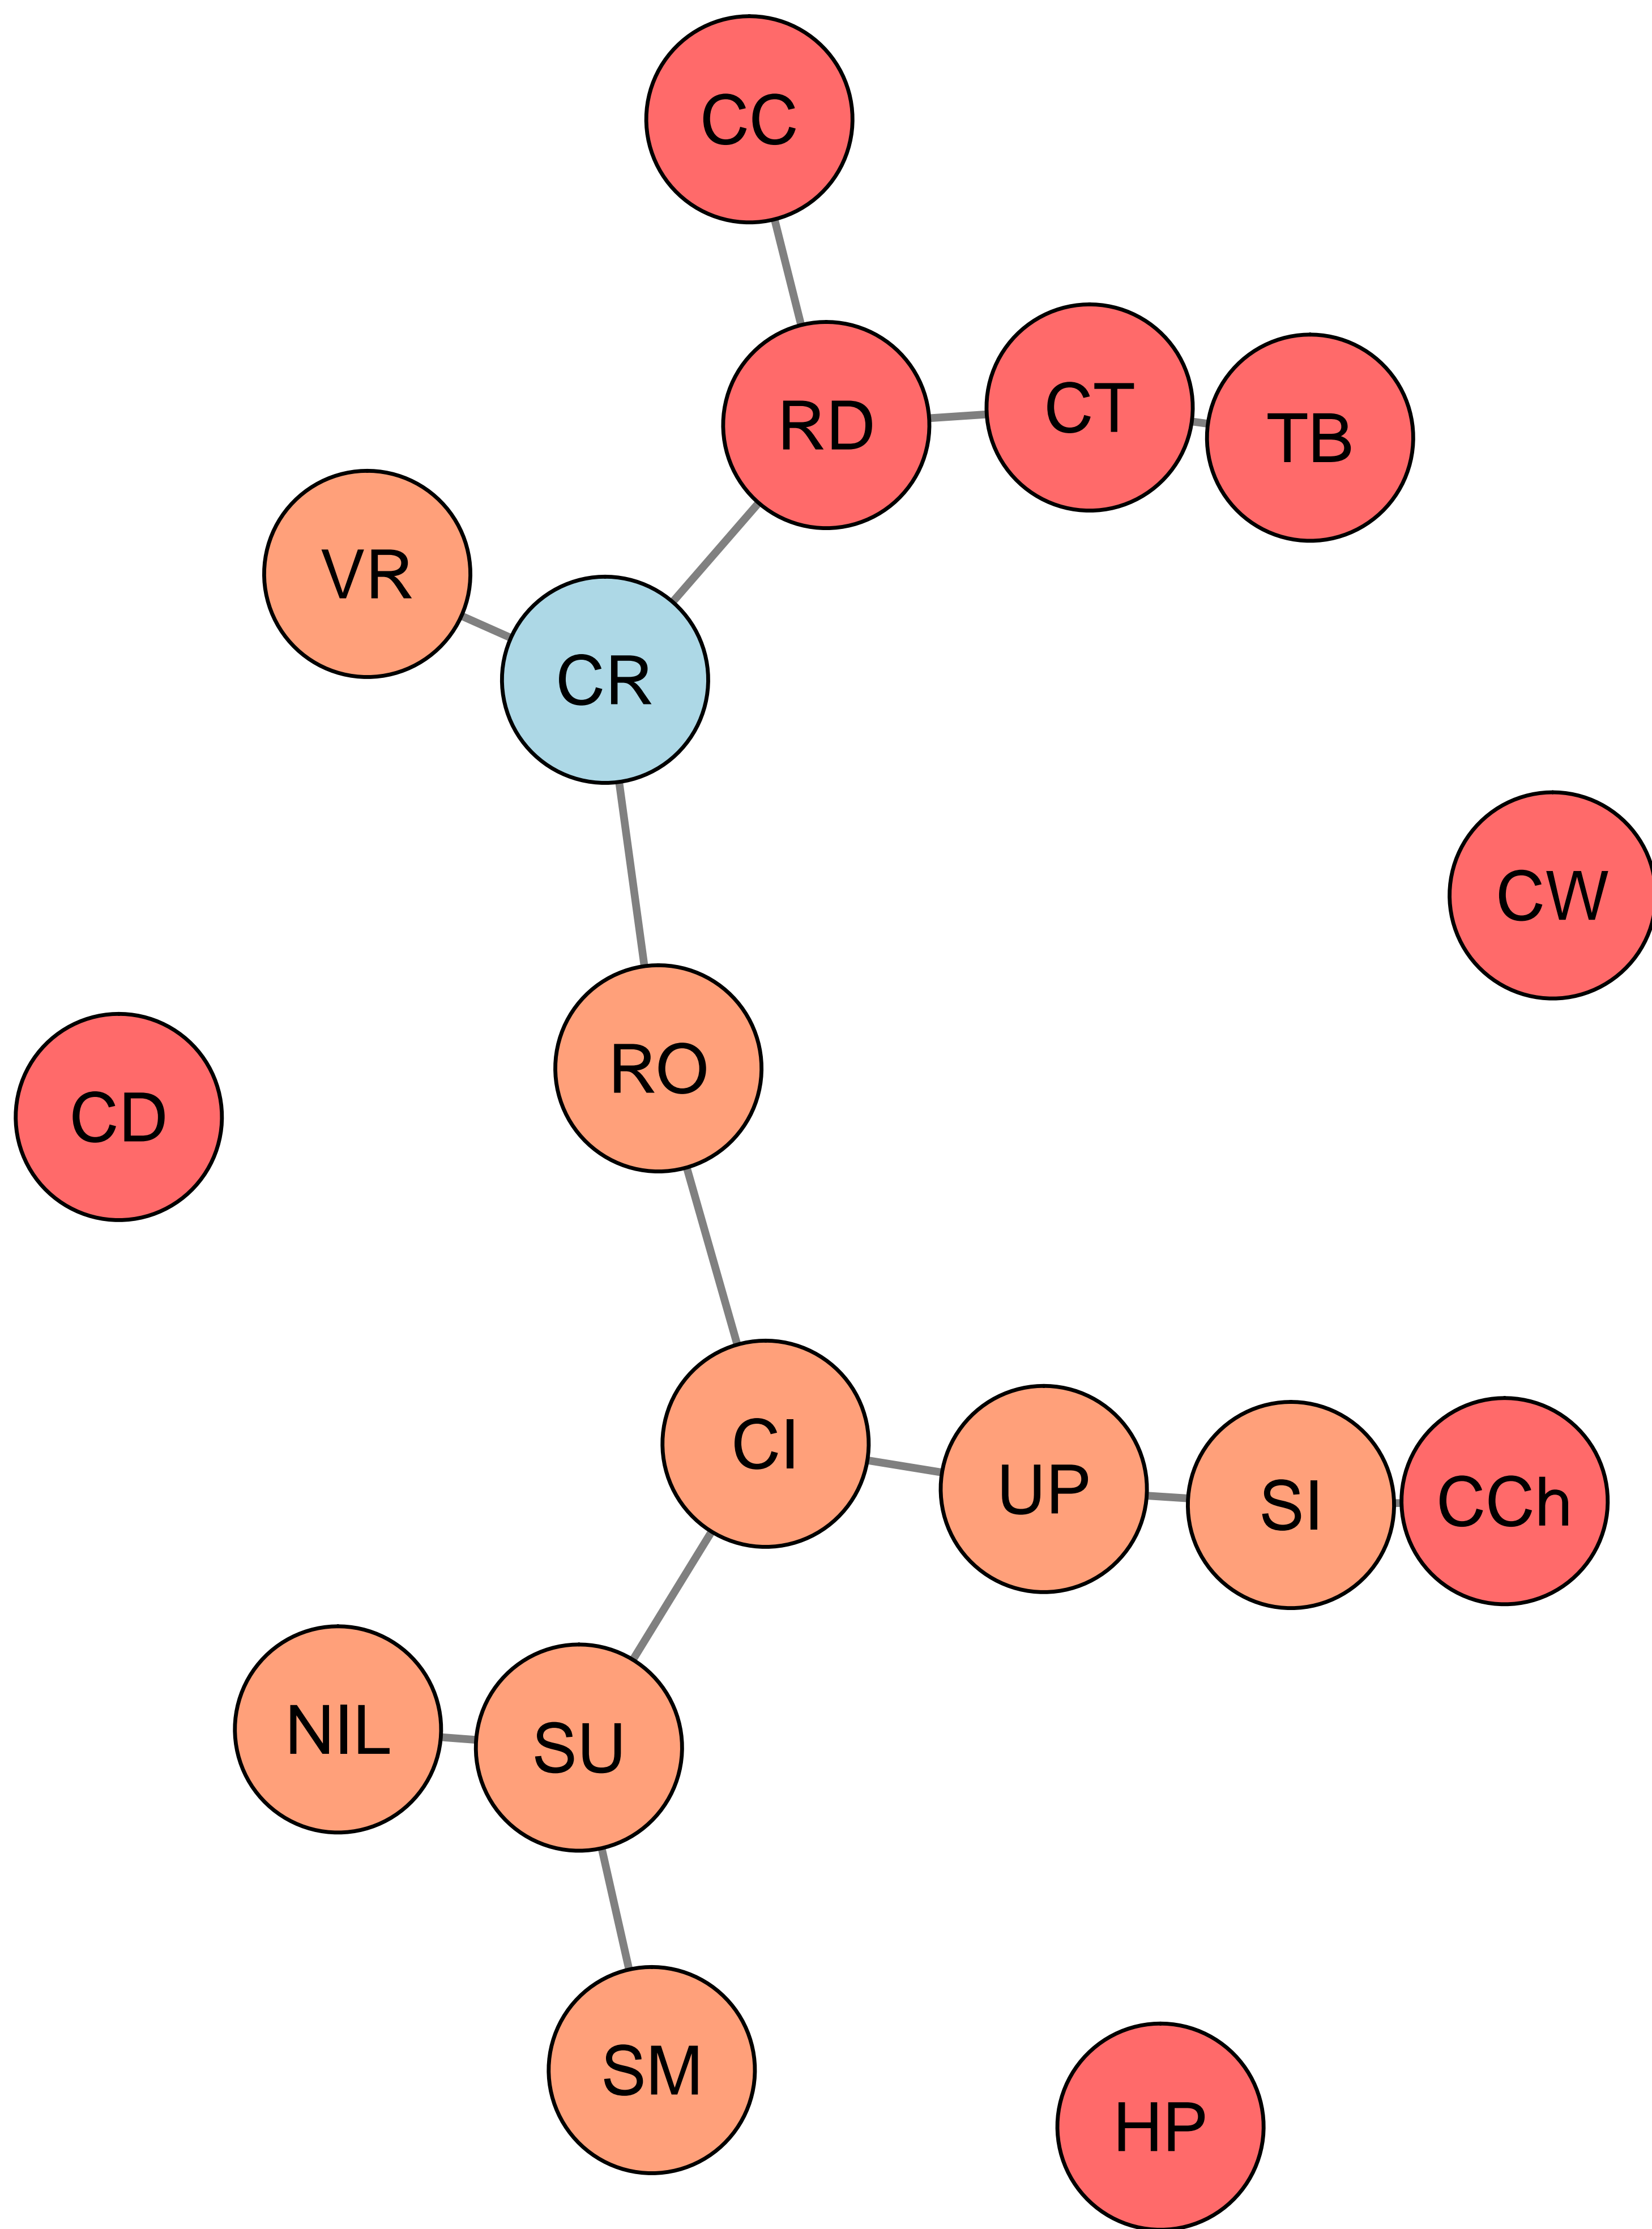

● Autism  
● Bridge  
● OCD



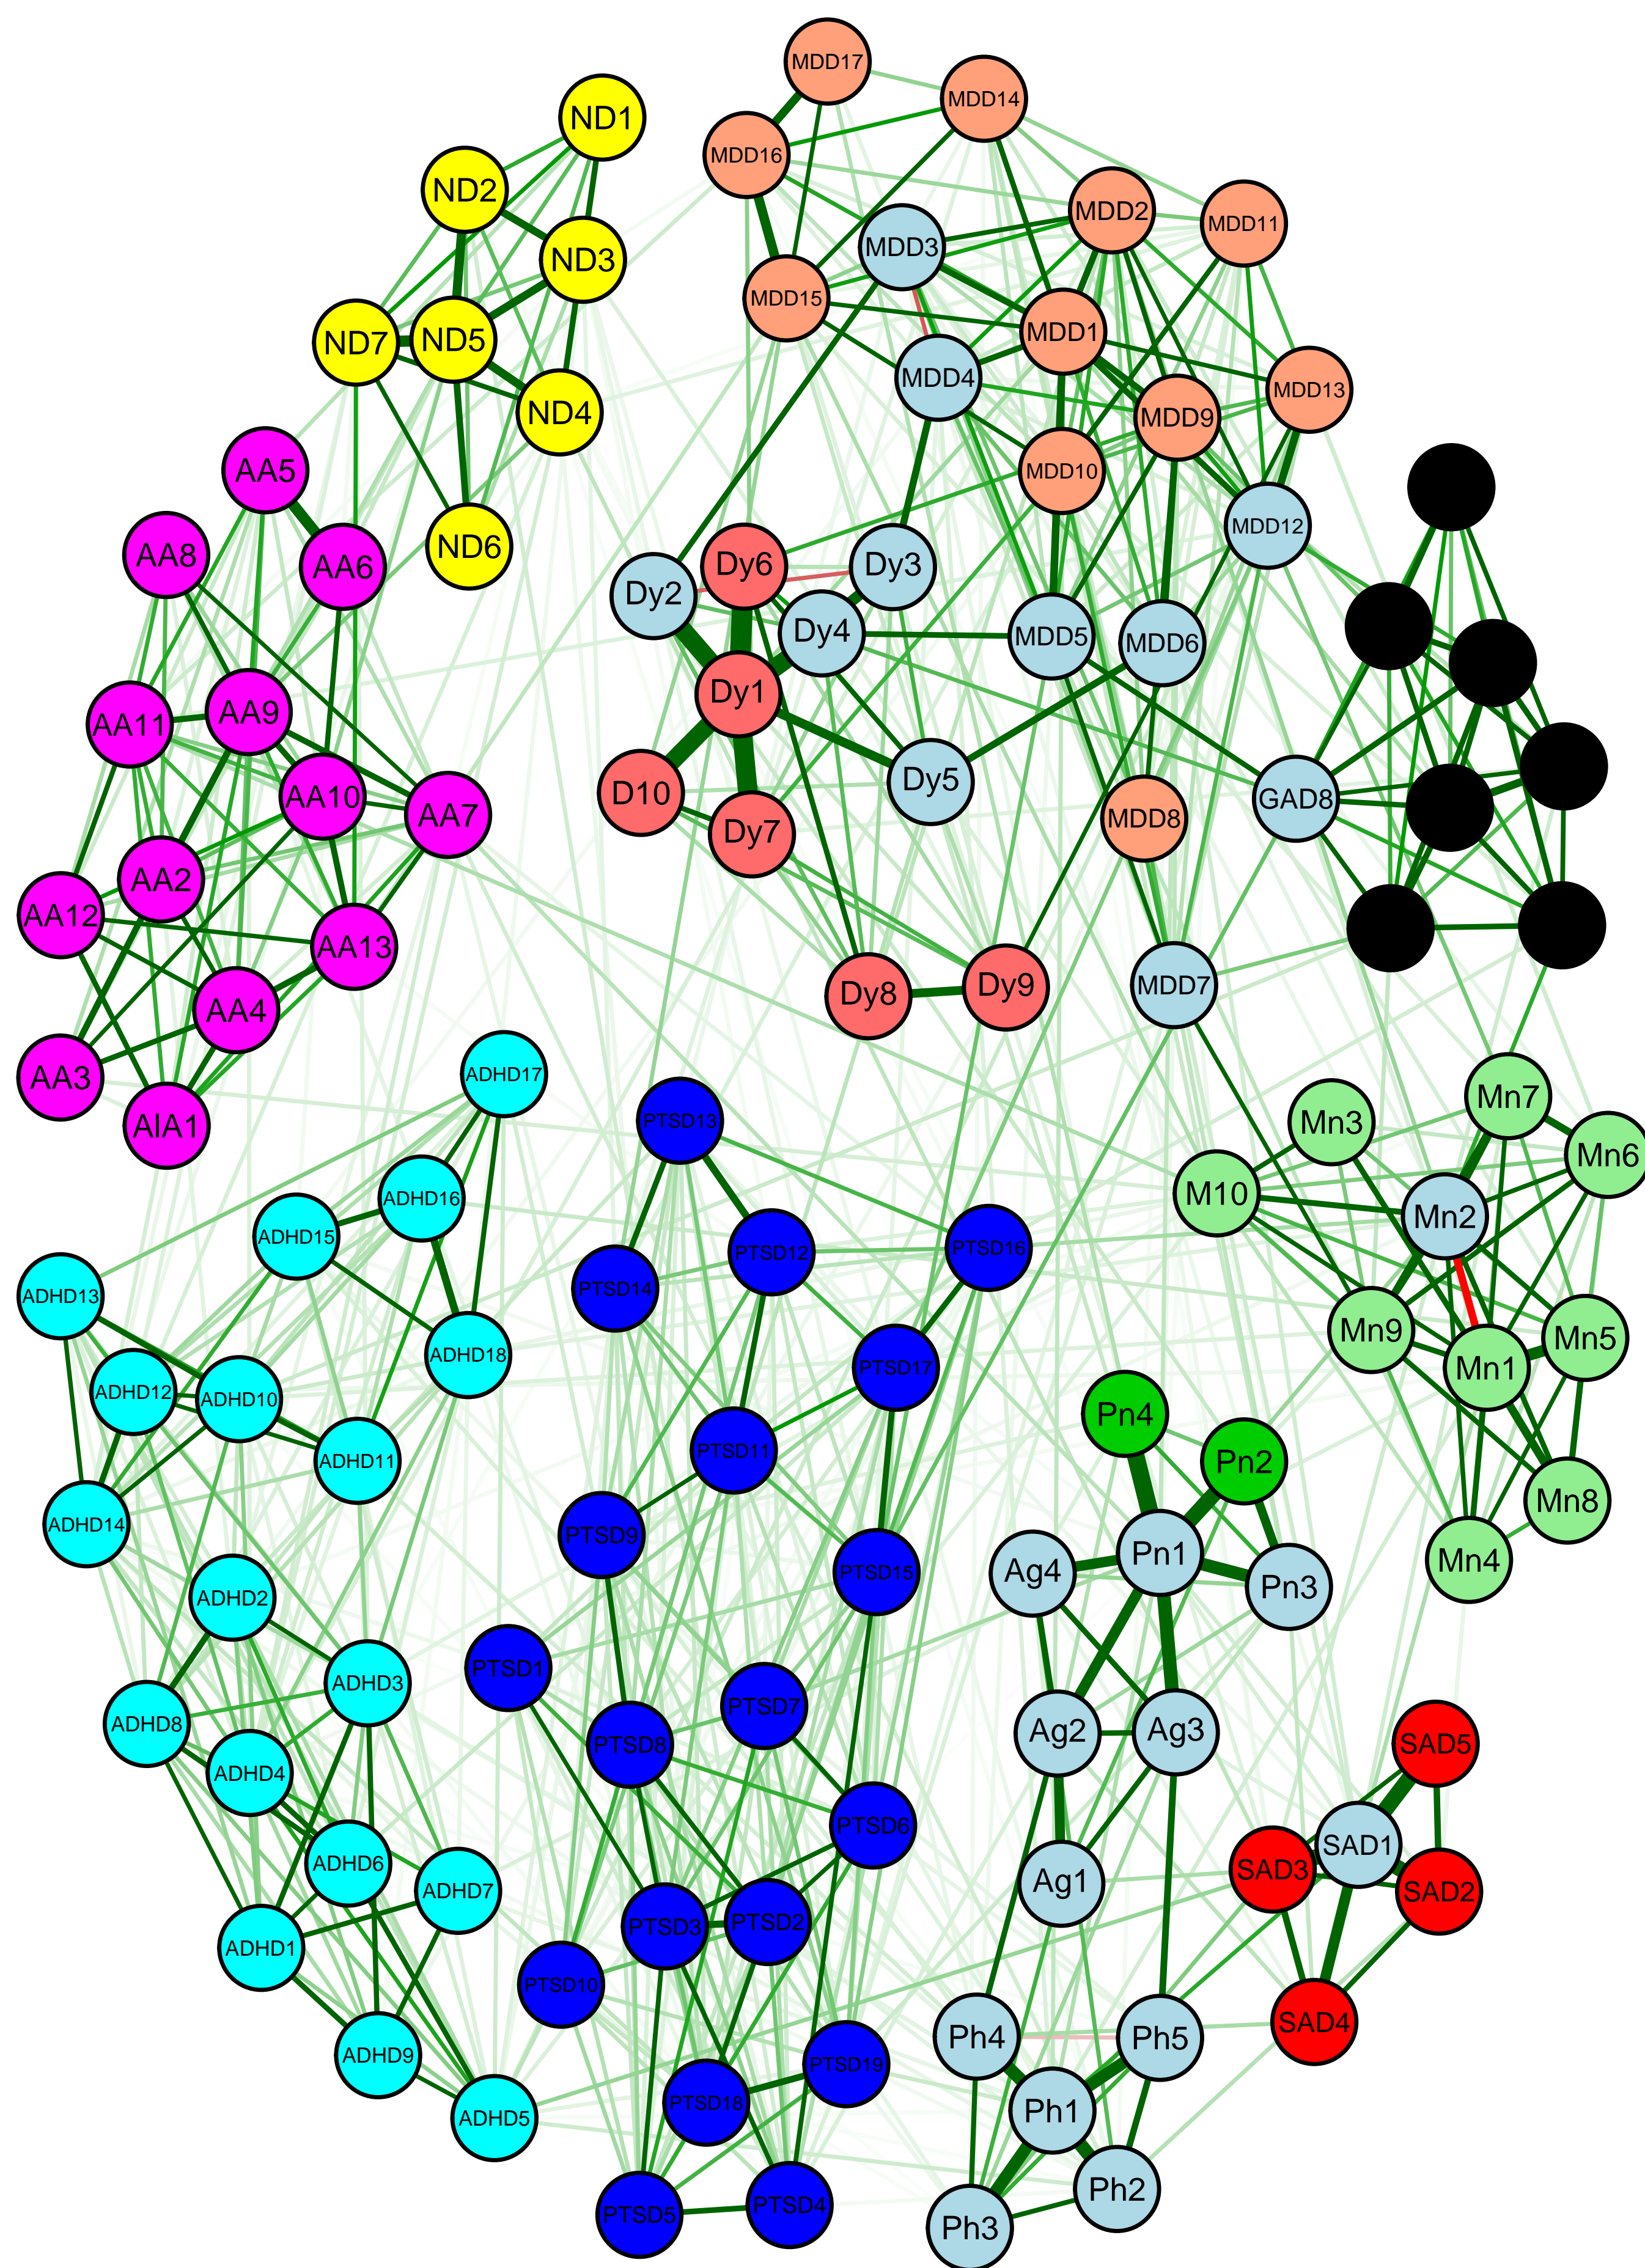

- MDD
- Bridge
- Dysthymia
- Mania
- GAD
- SAD
- Panic
- PTSD
- ADHD
- AlcoholAbuse
- NicotineDependence



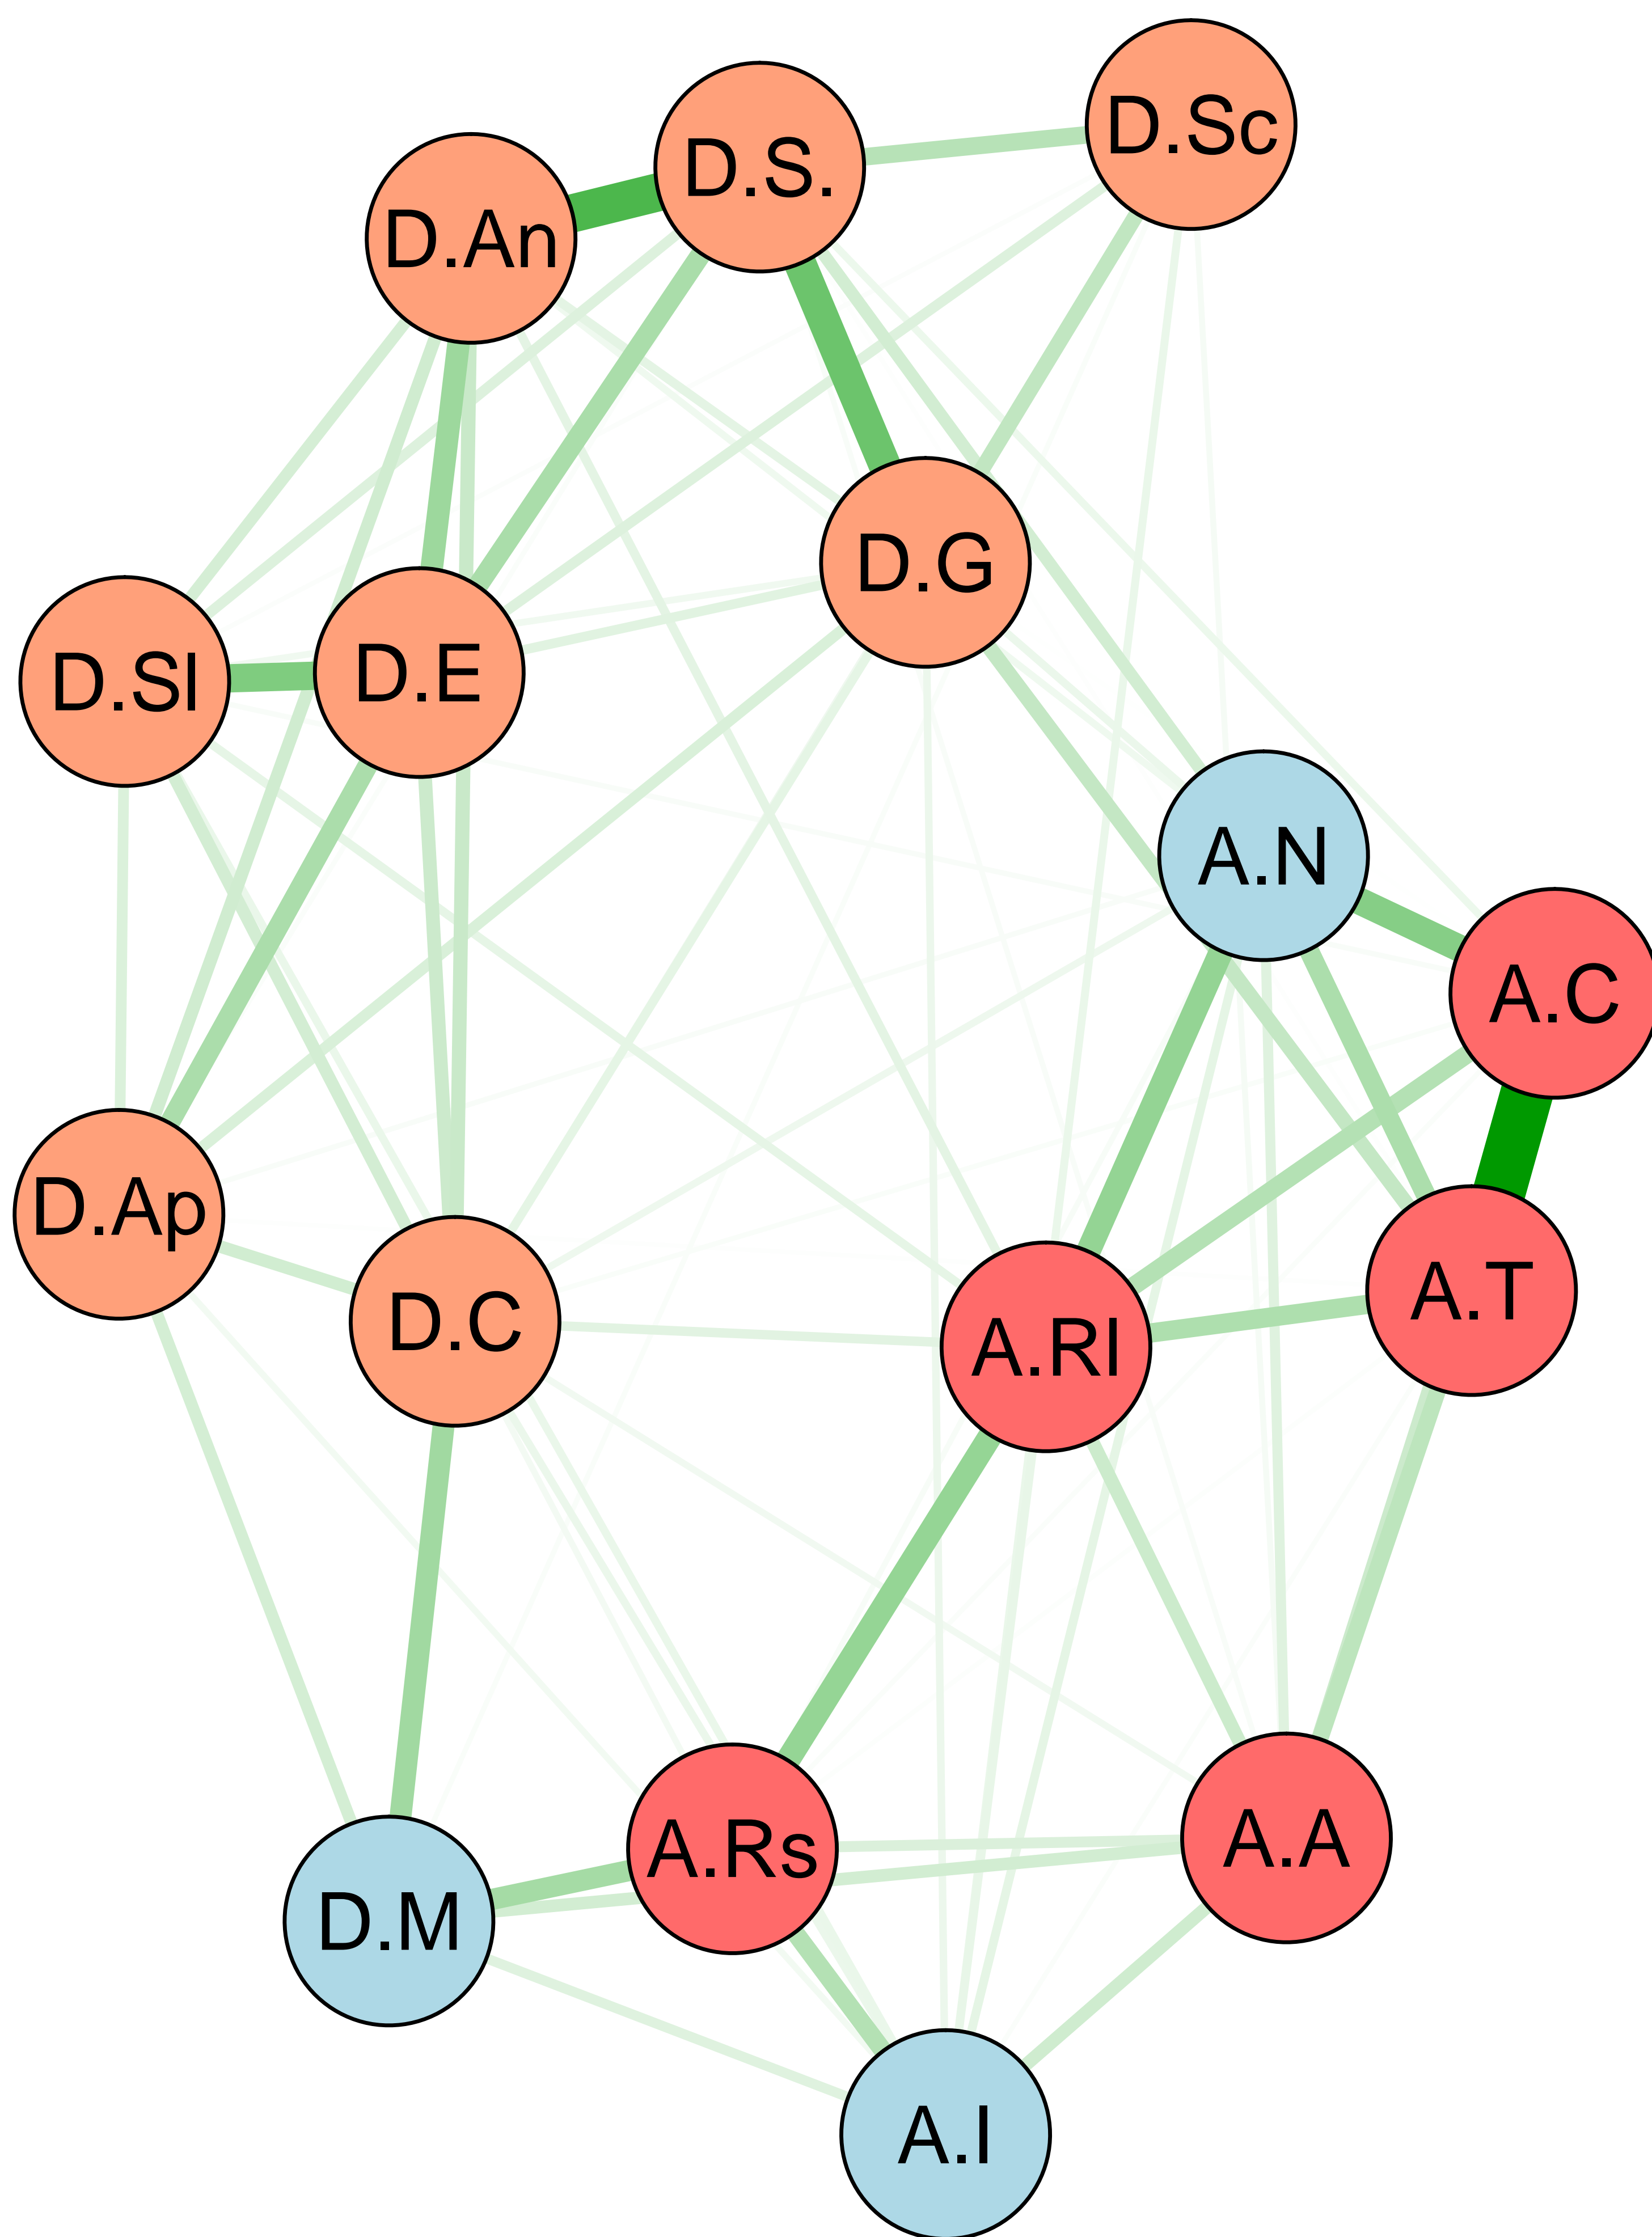



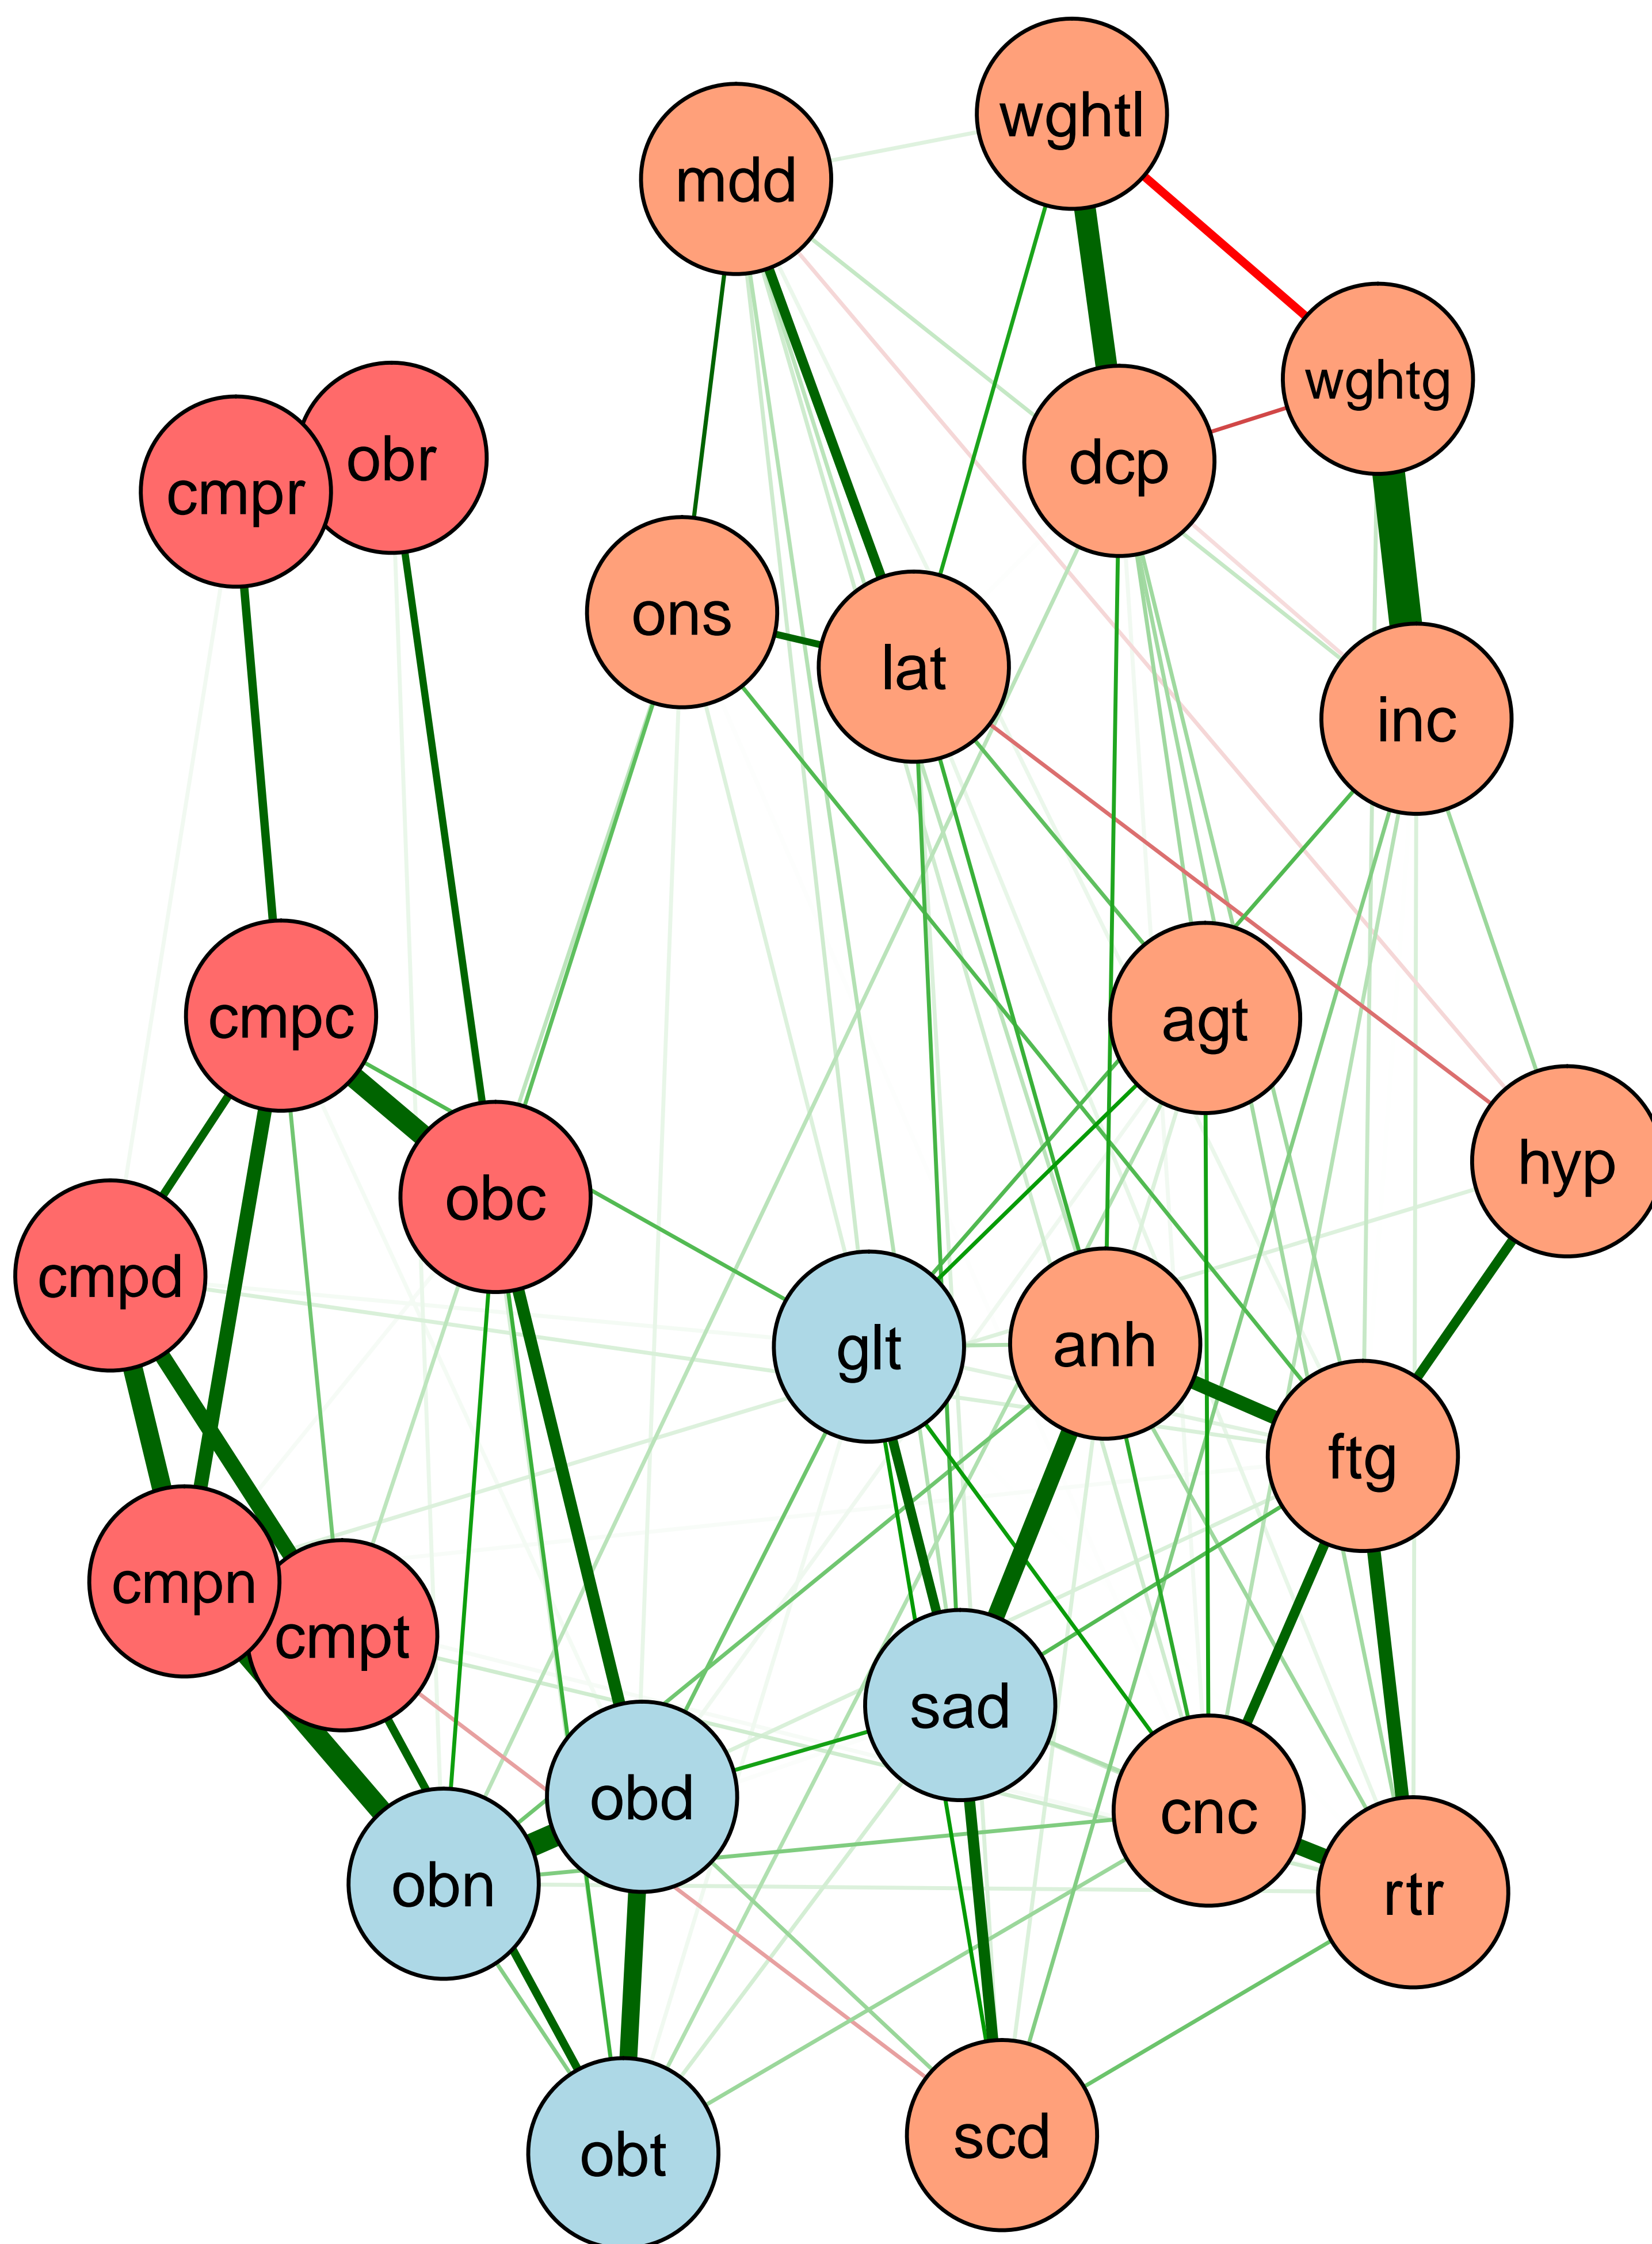

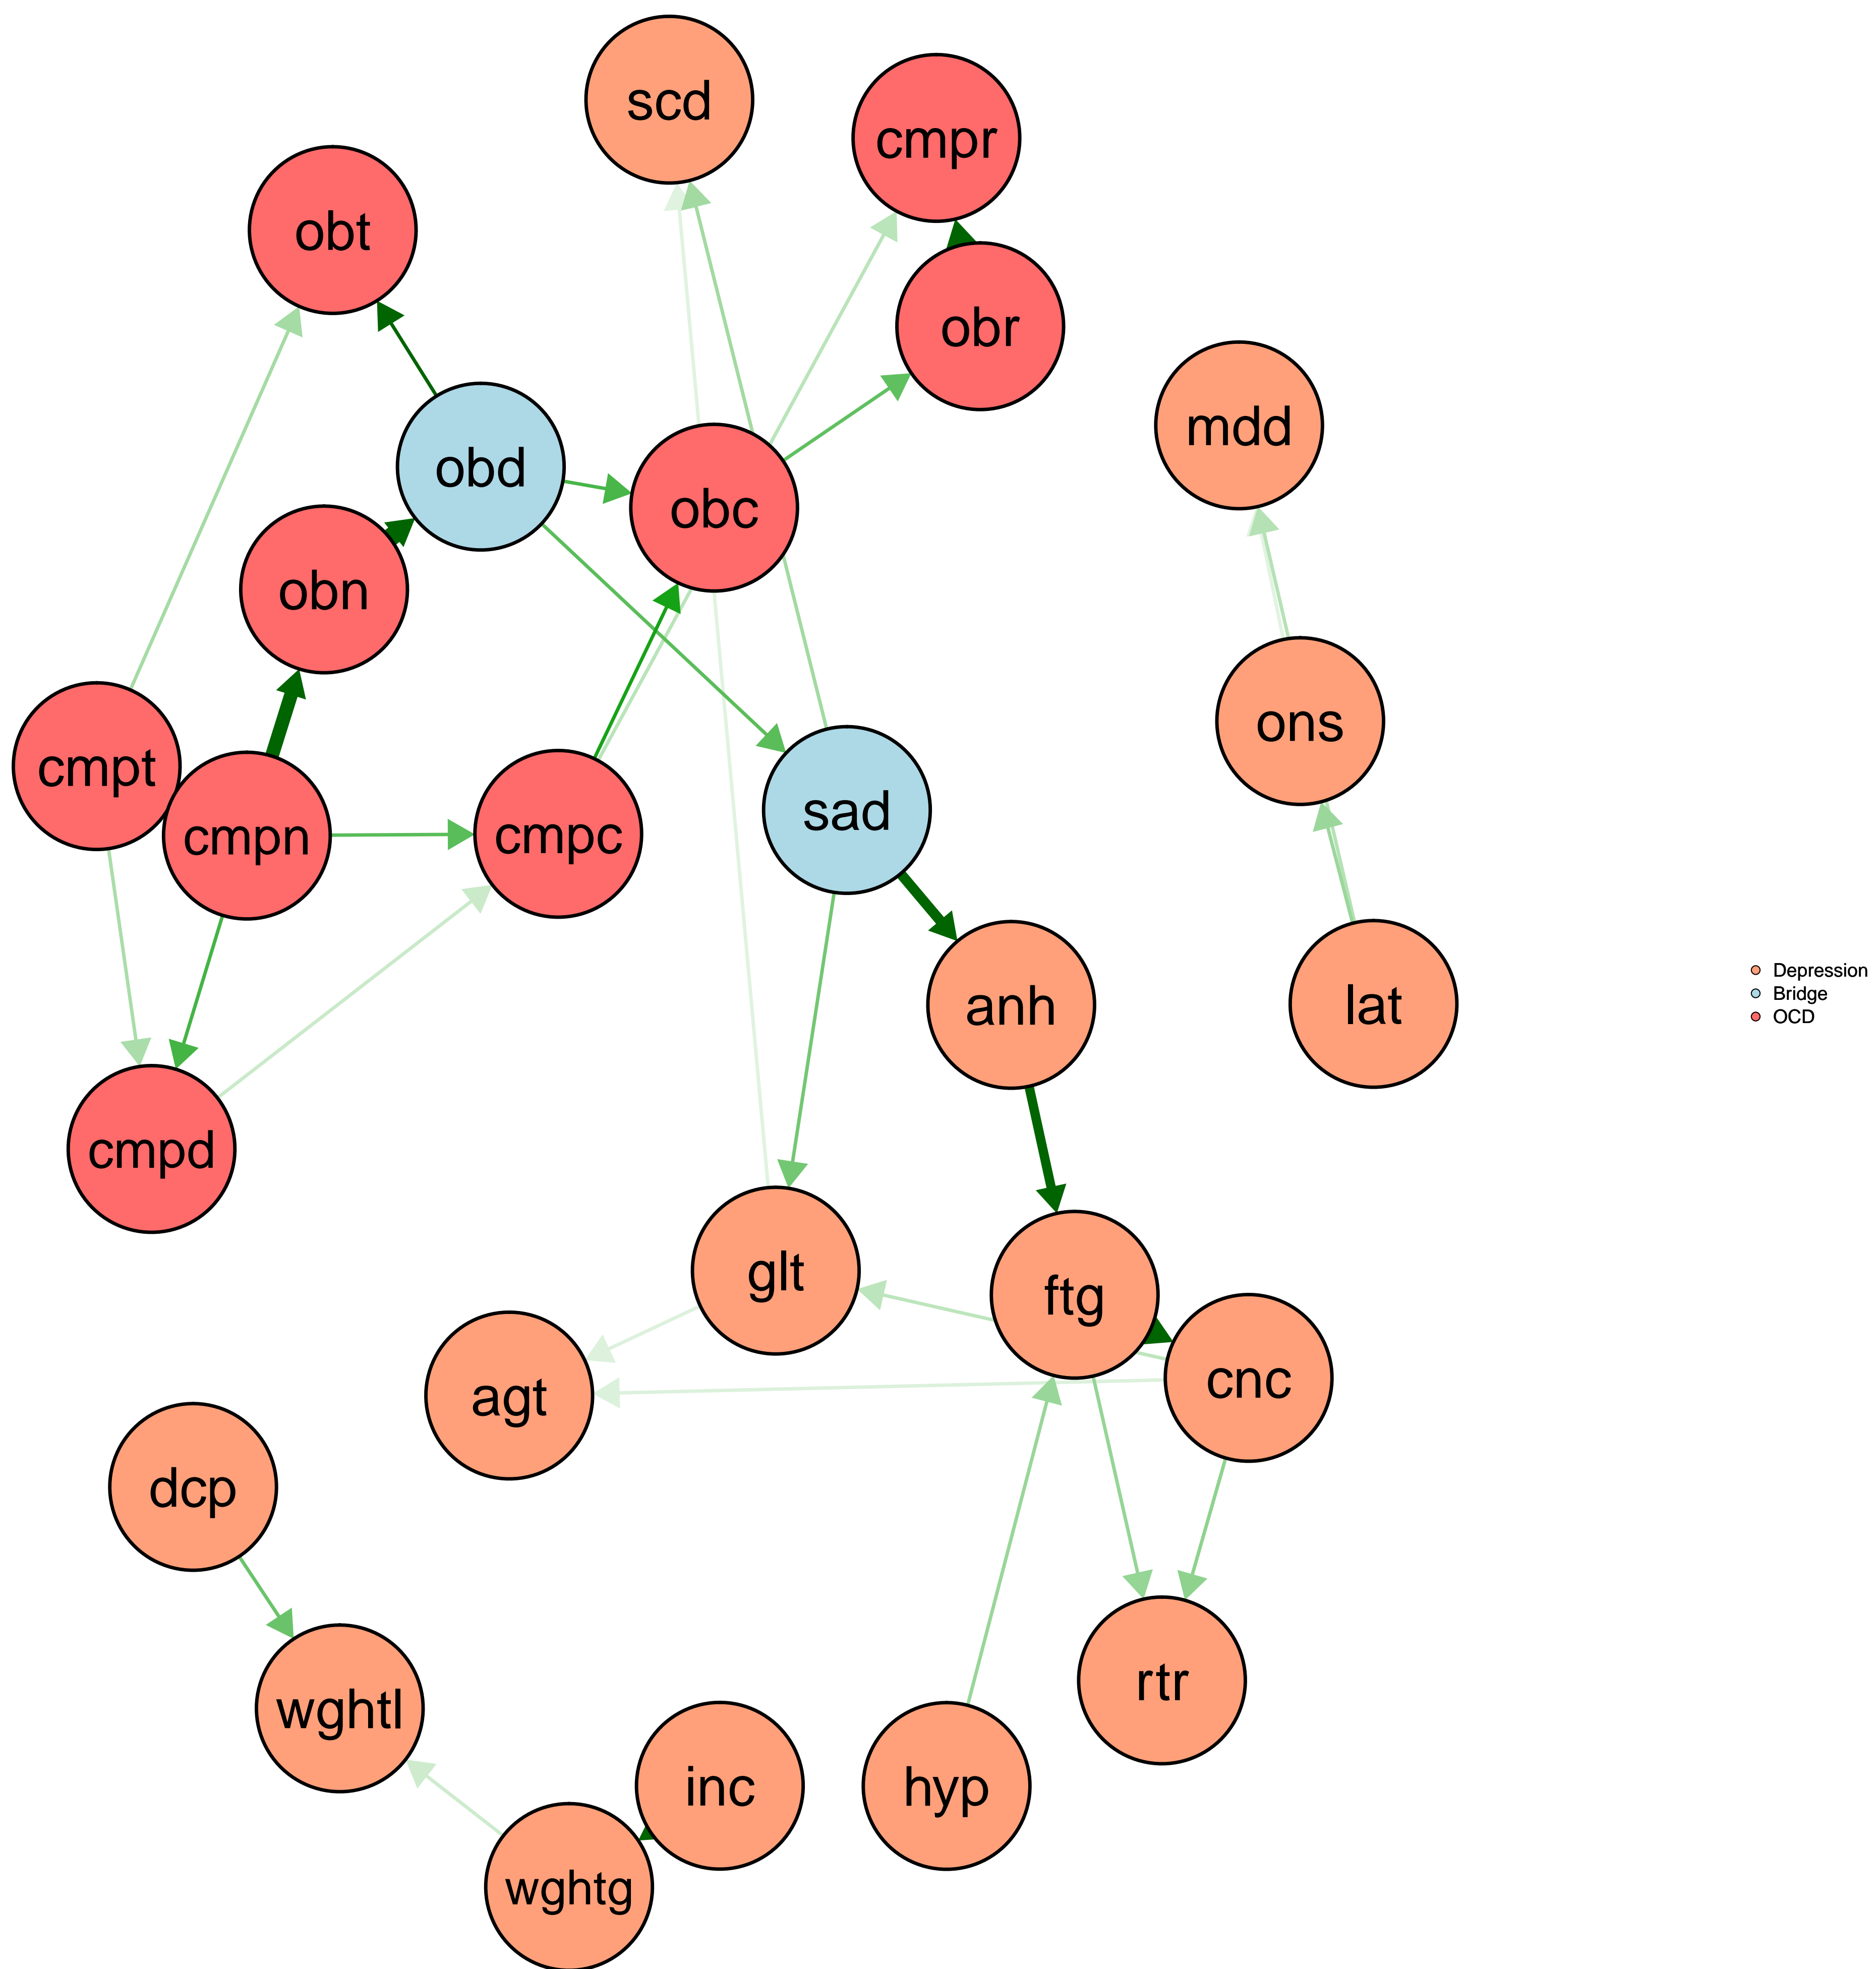



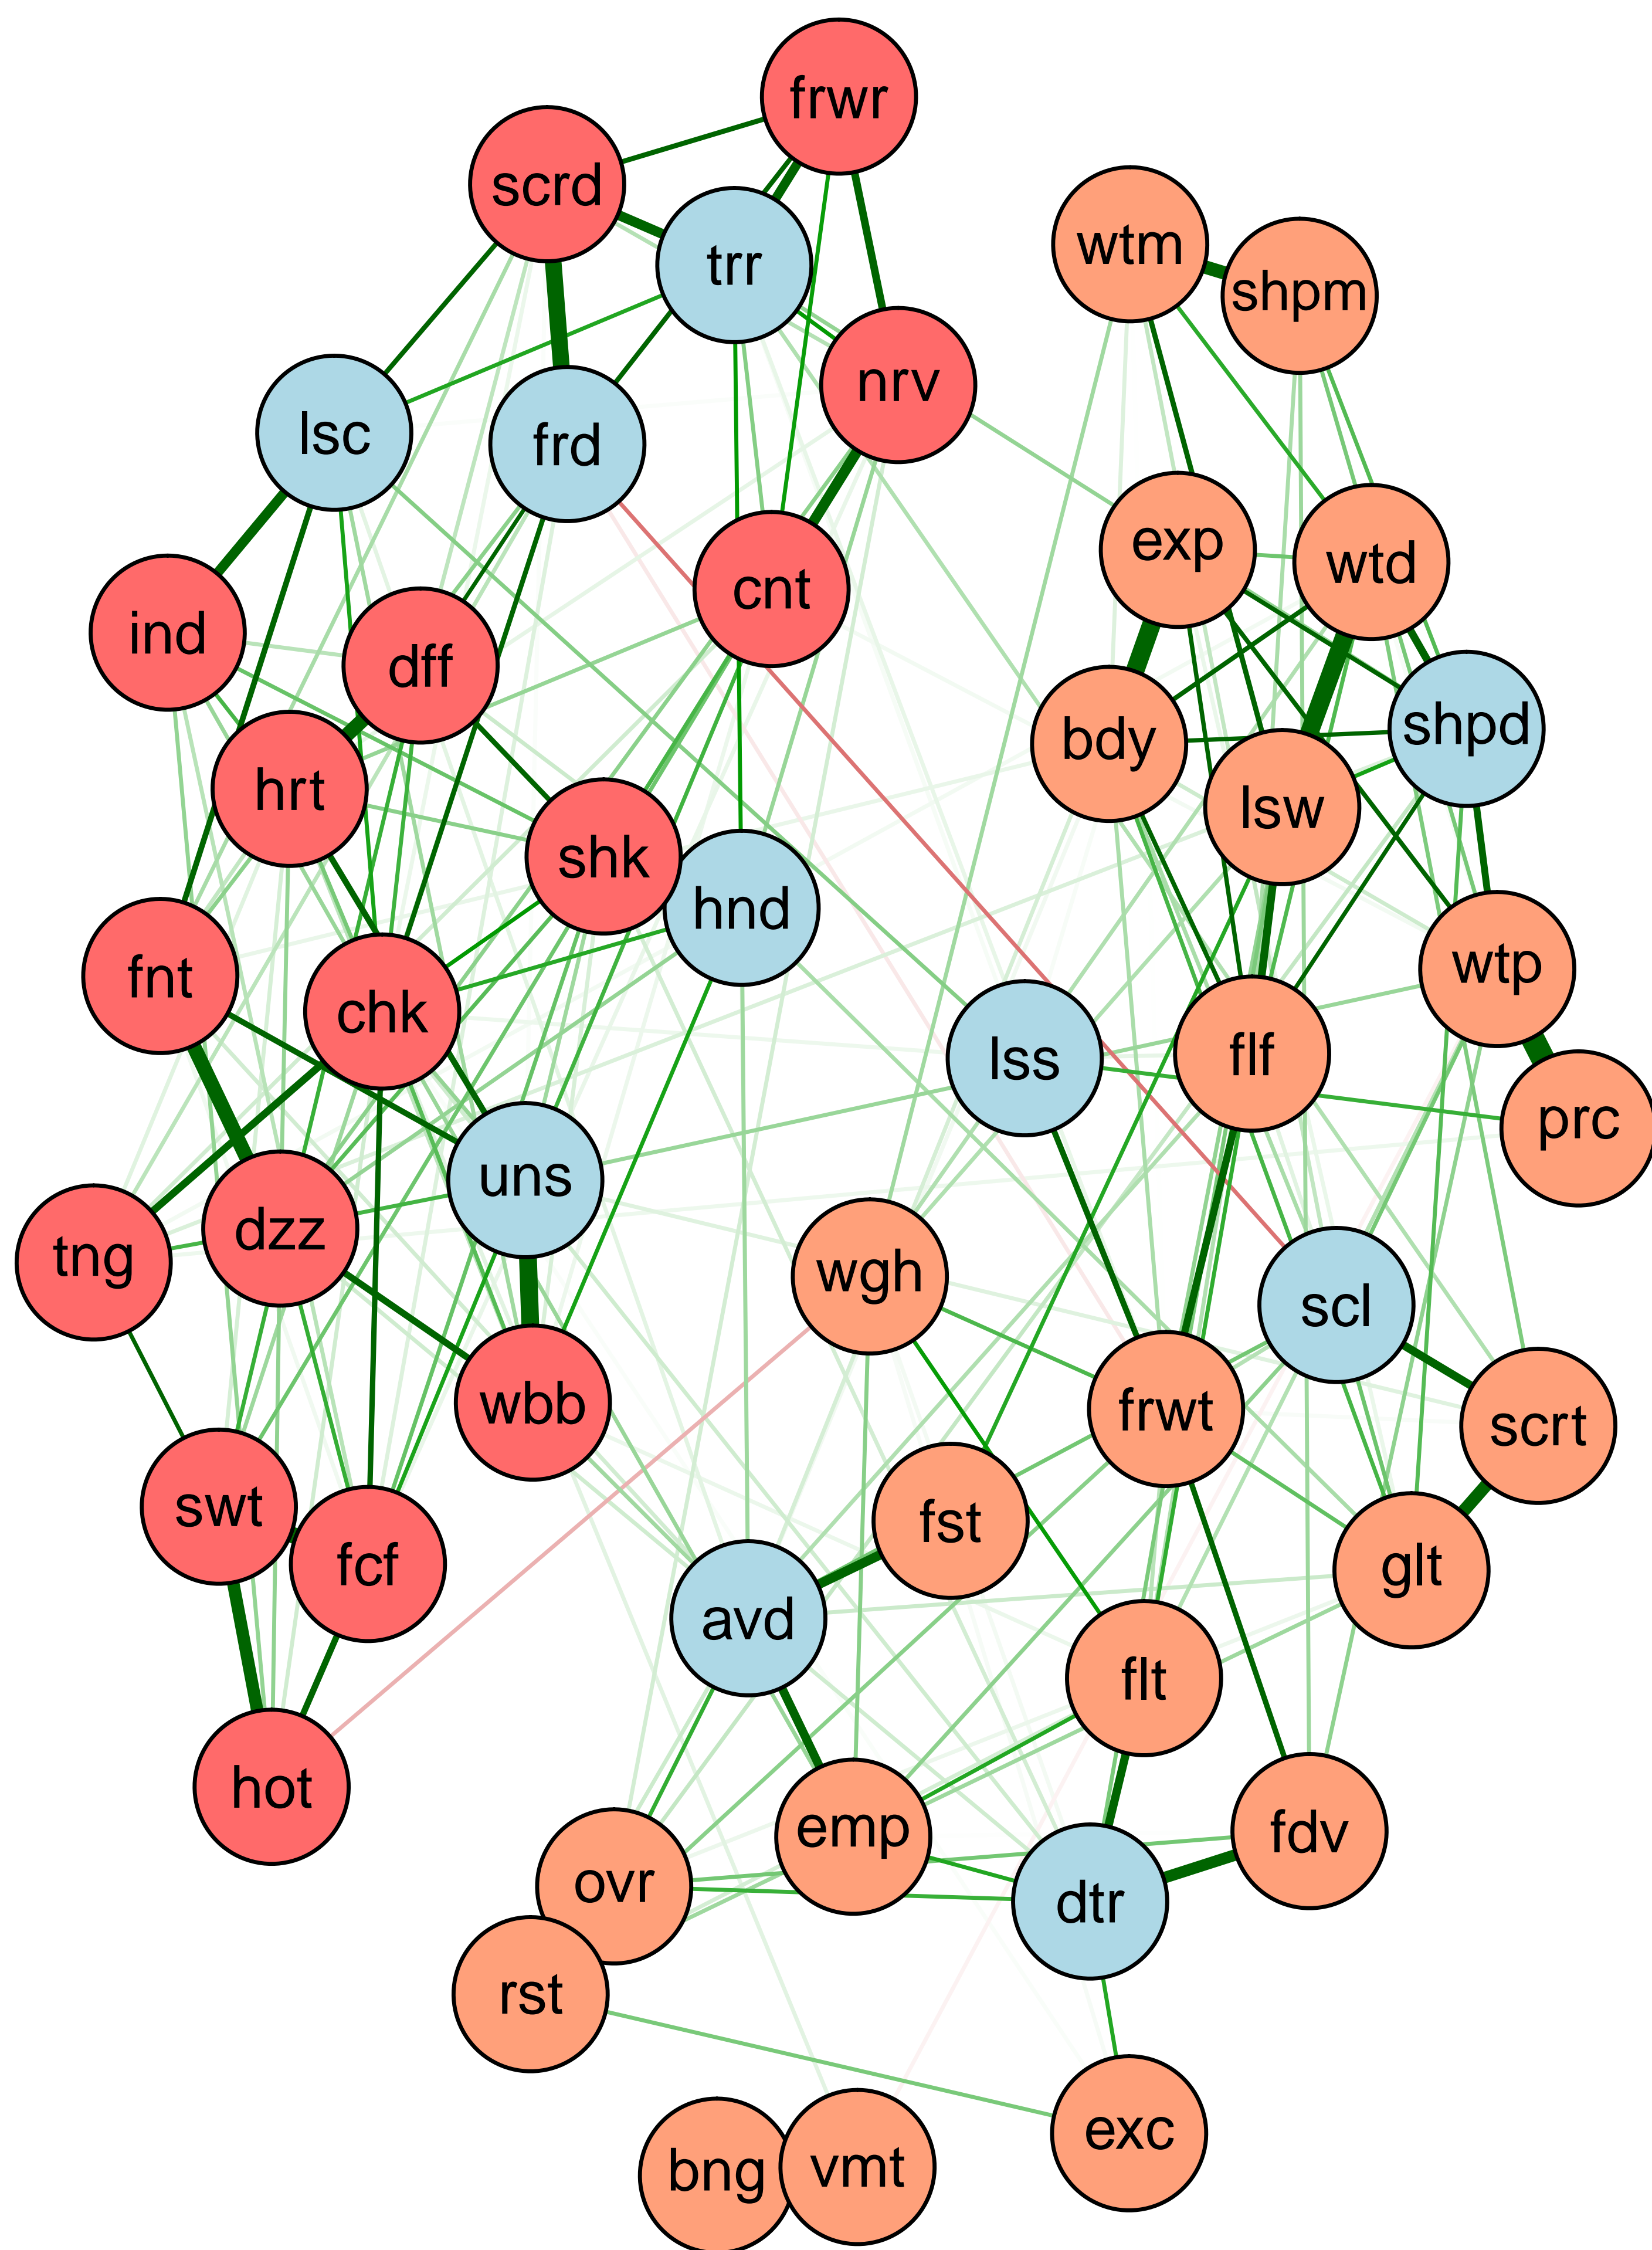



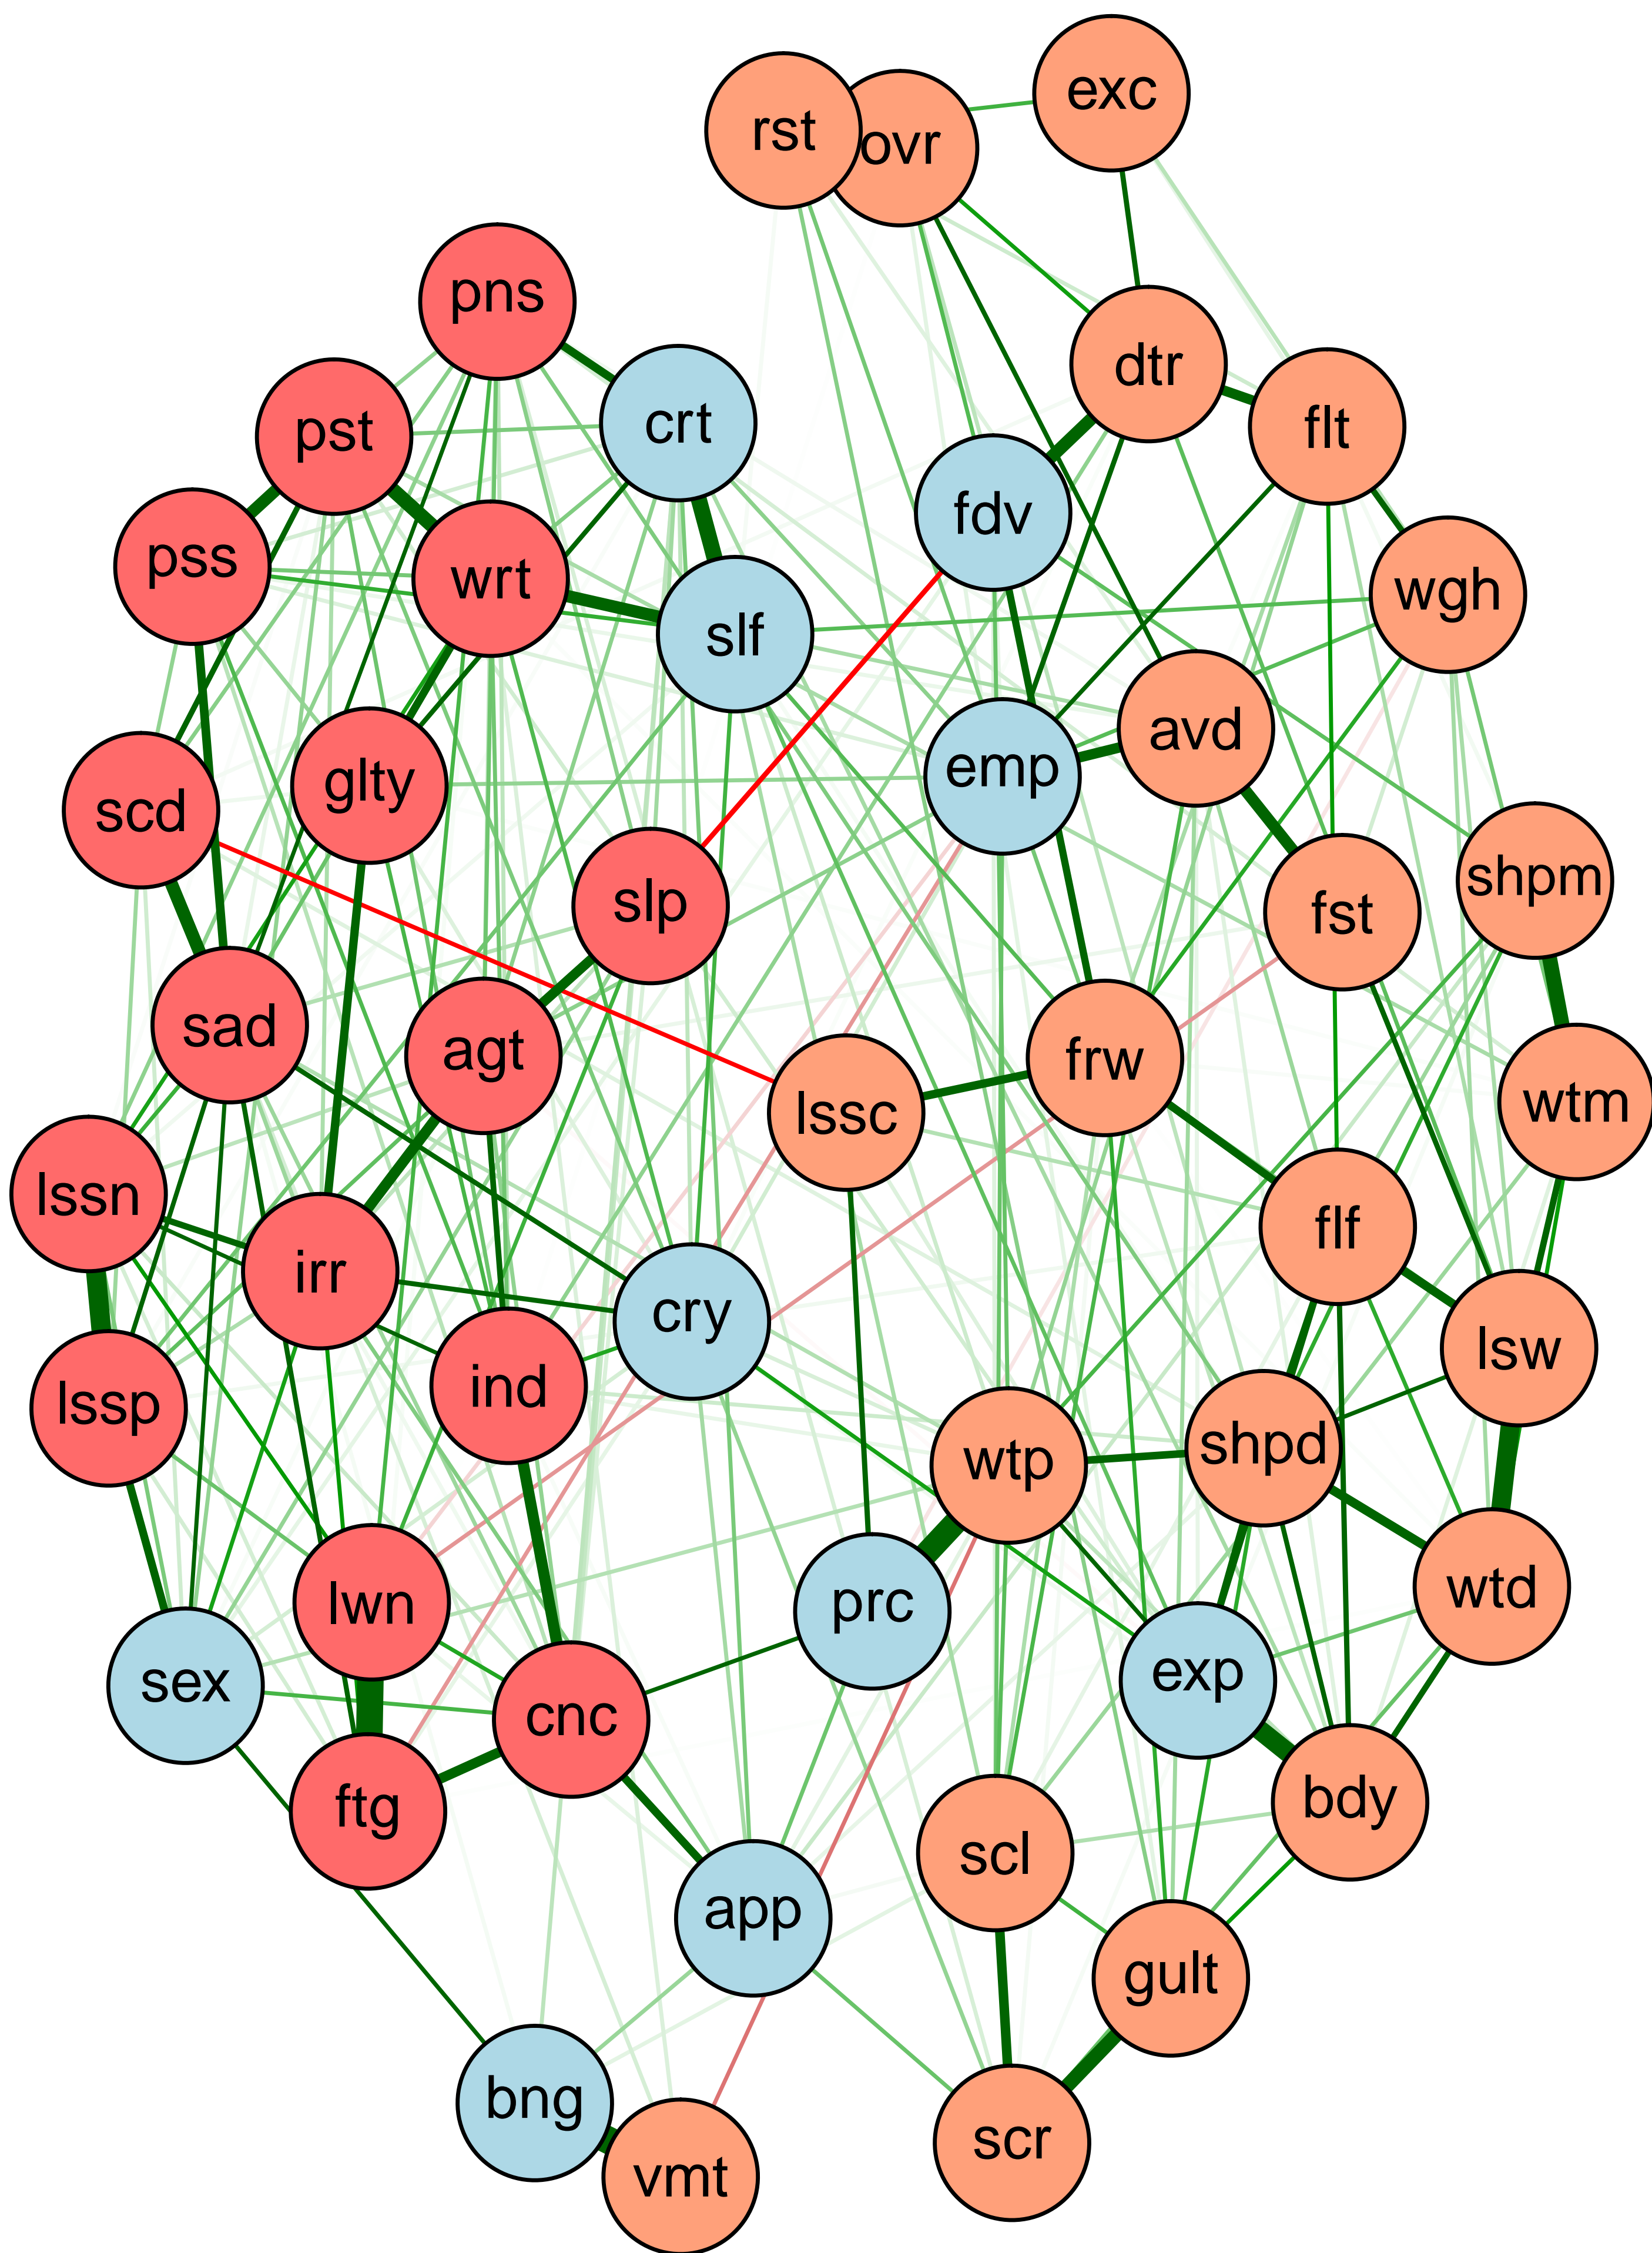



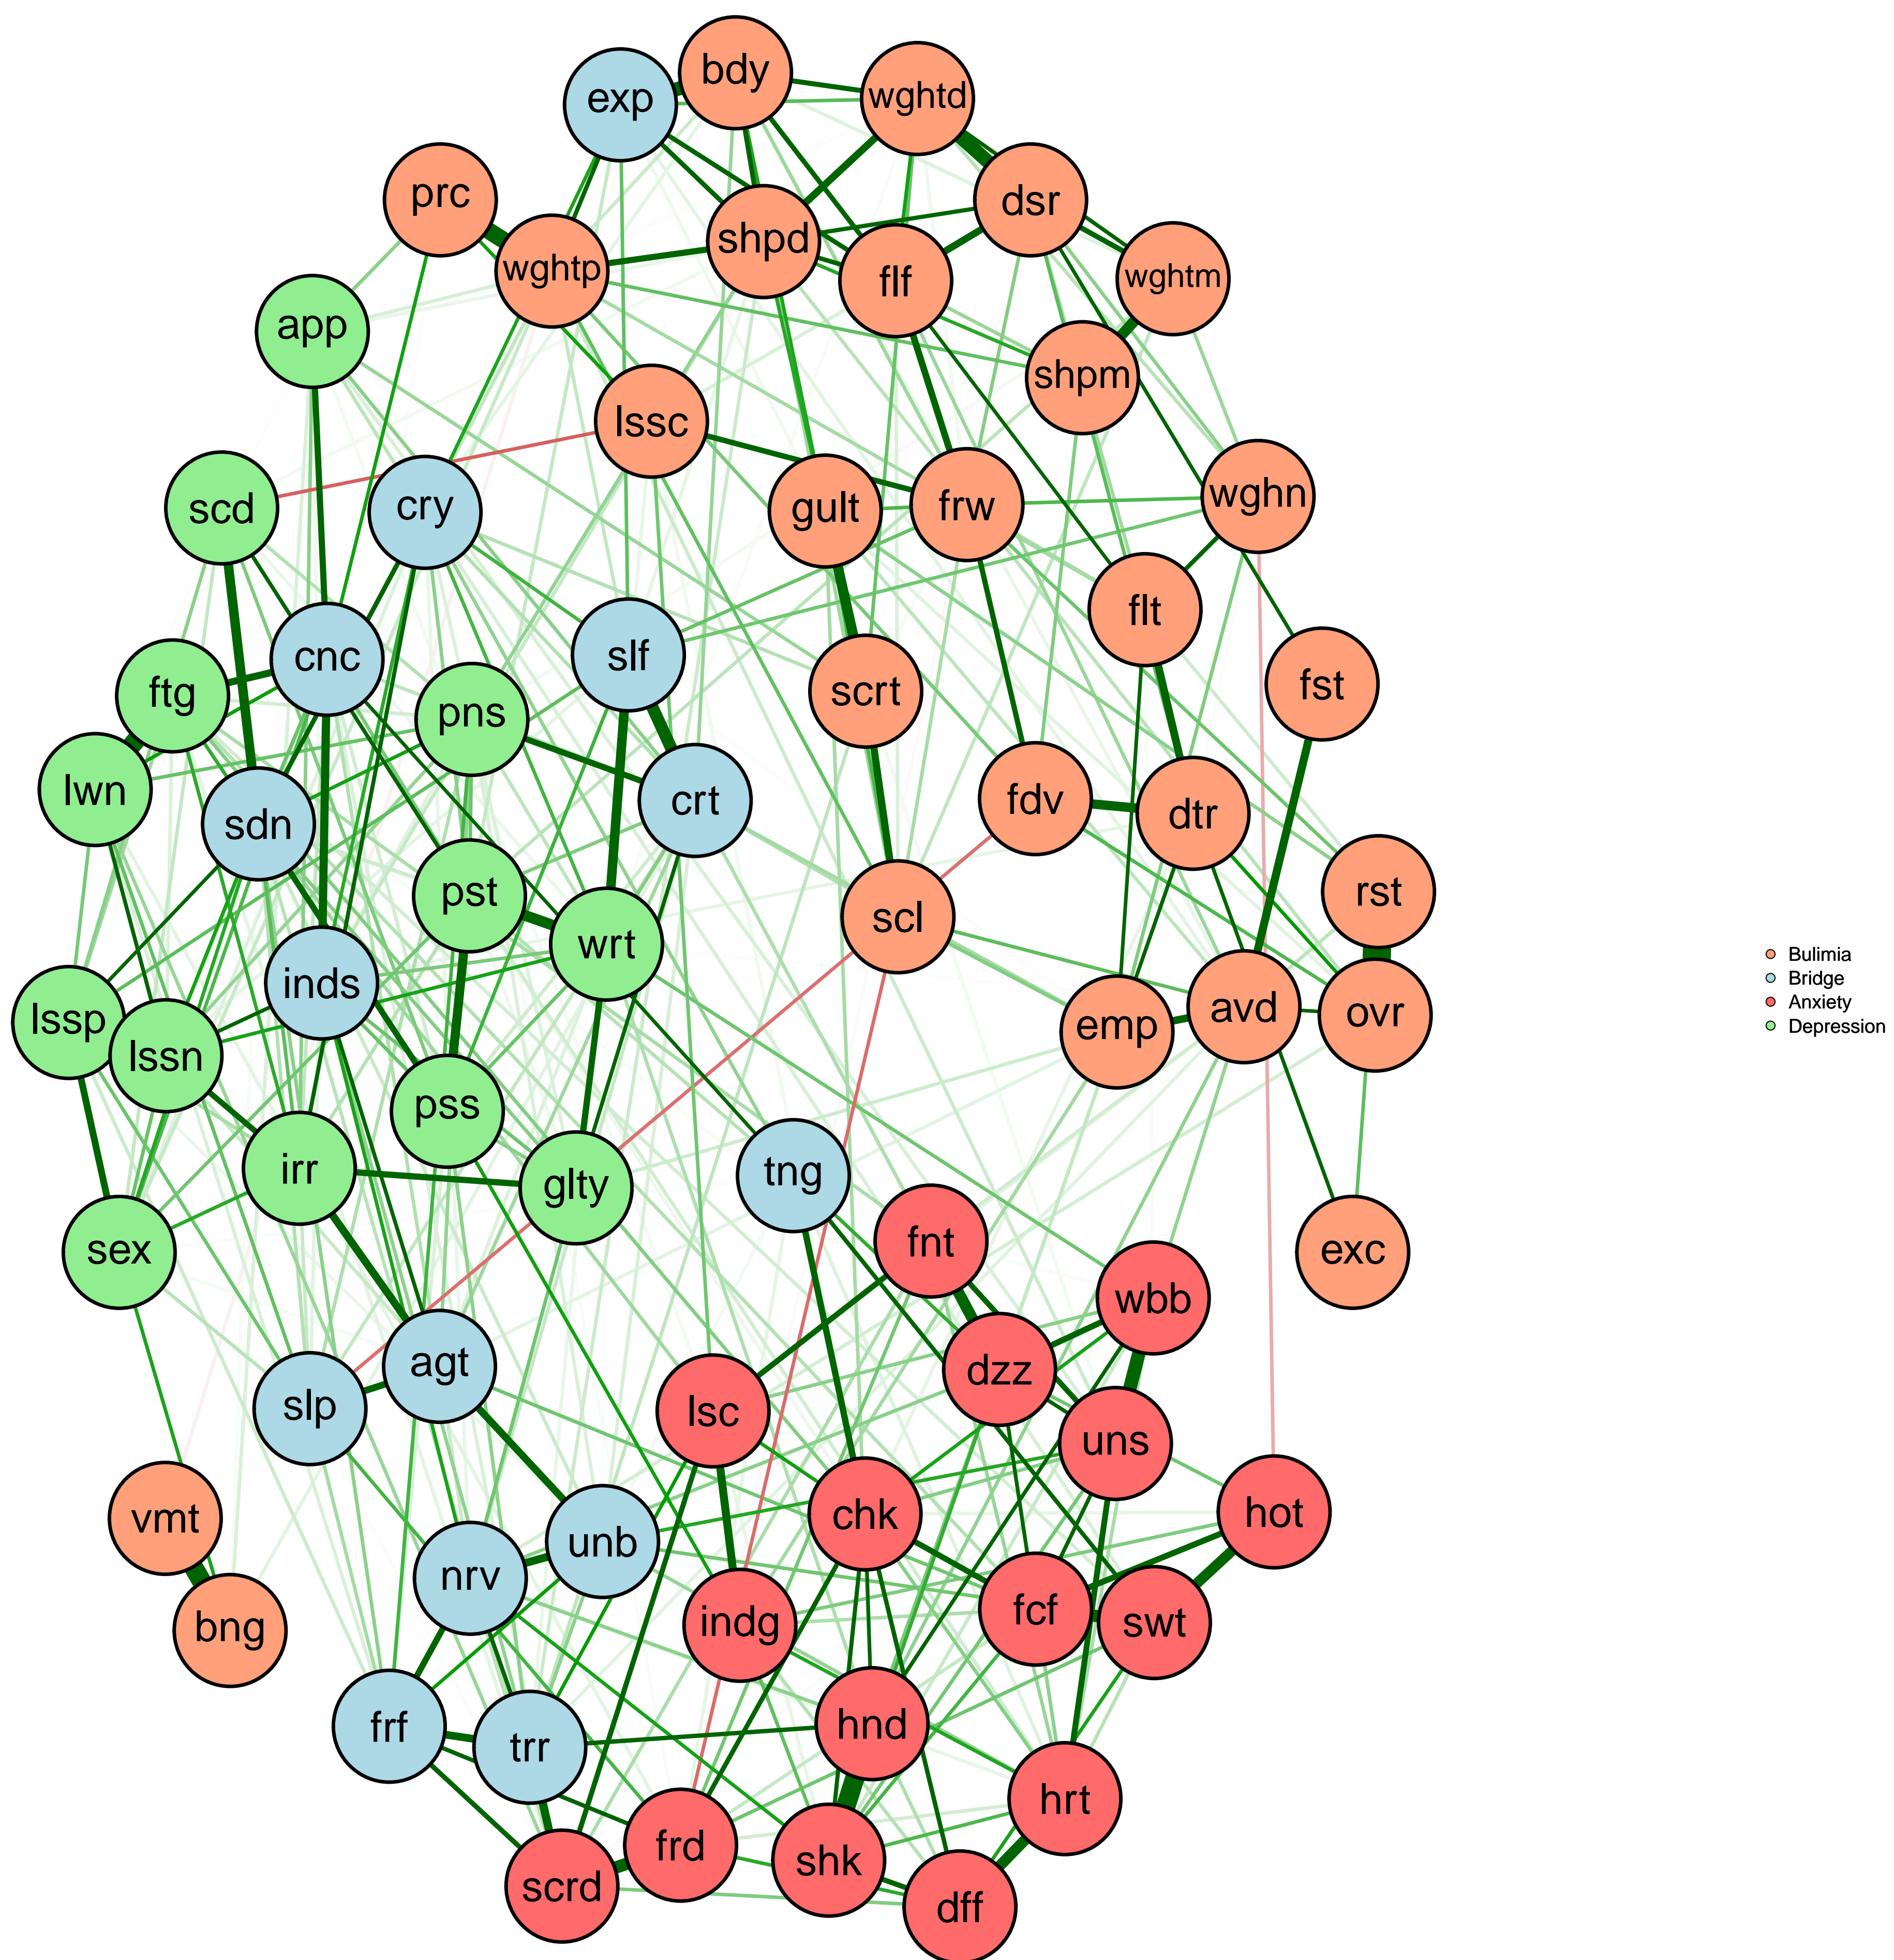



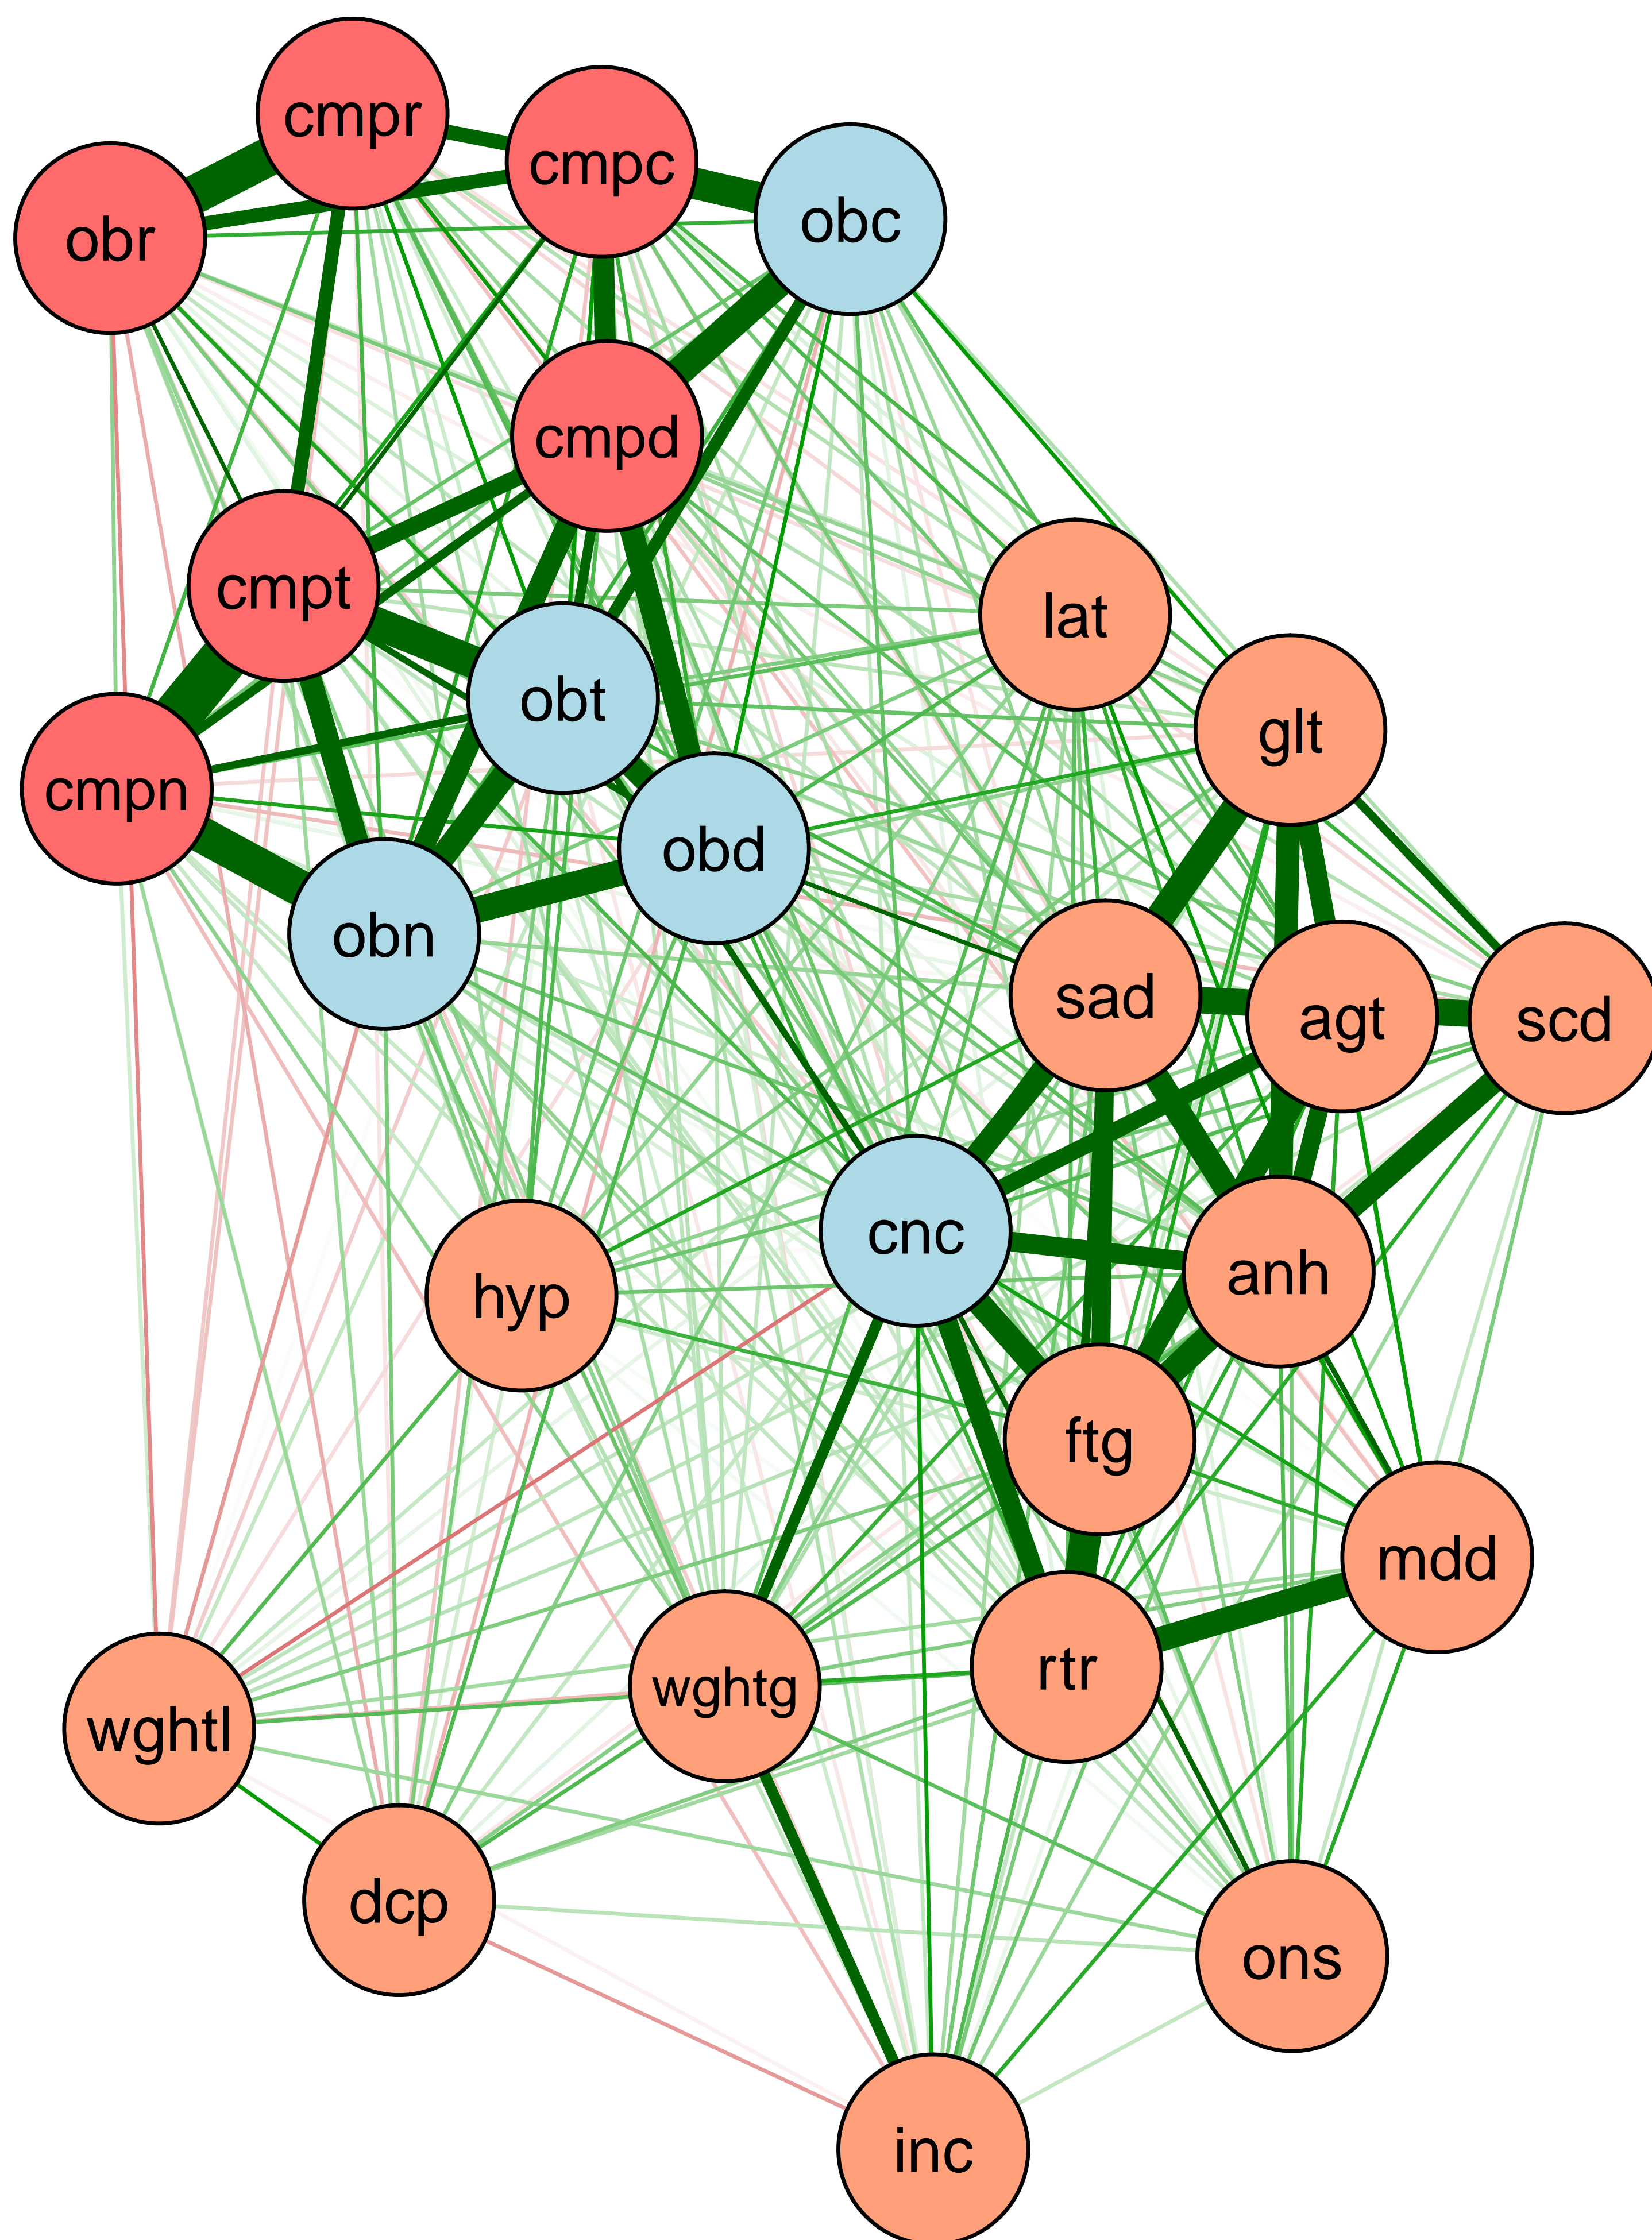

○ Depression  
○ Bridge  
○ OCD

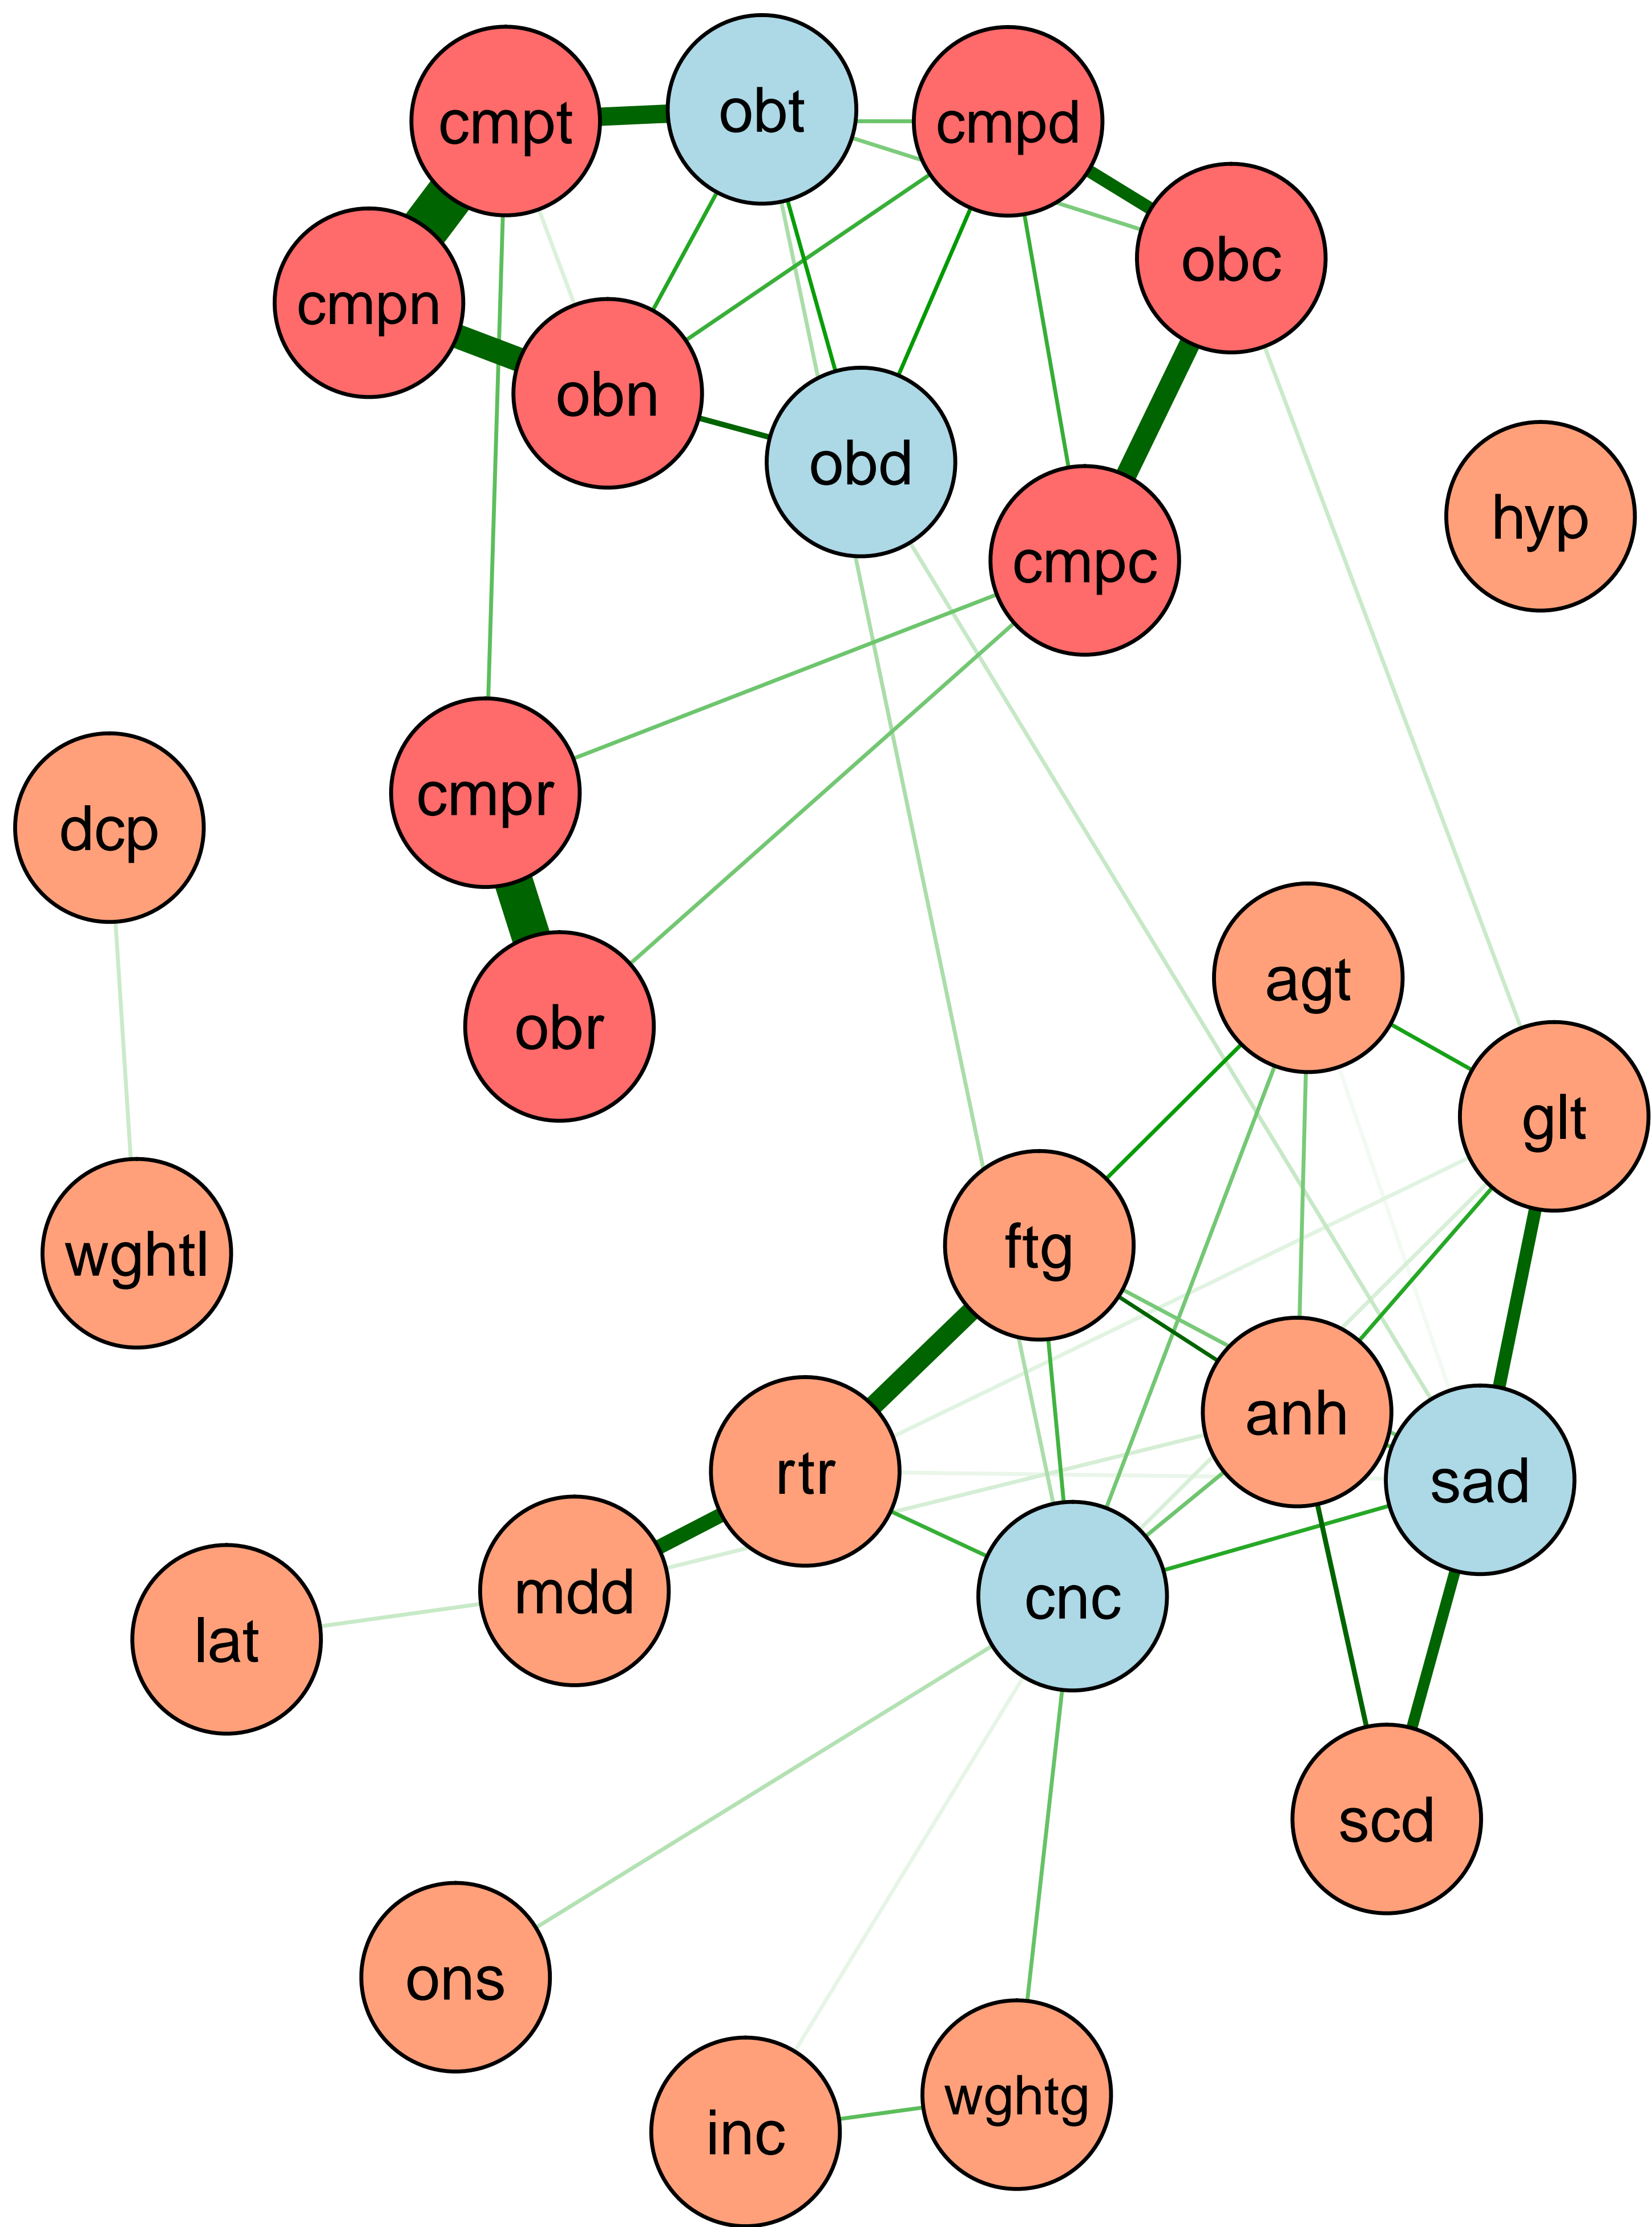

○ Depression  
○ Bridge  
○ OCD



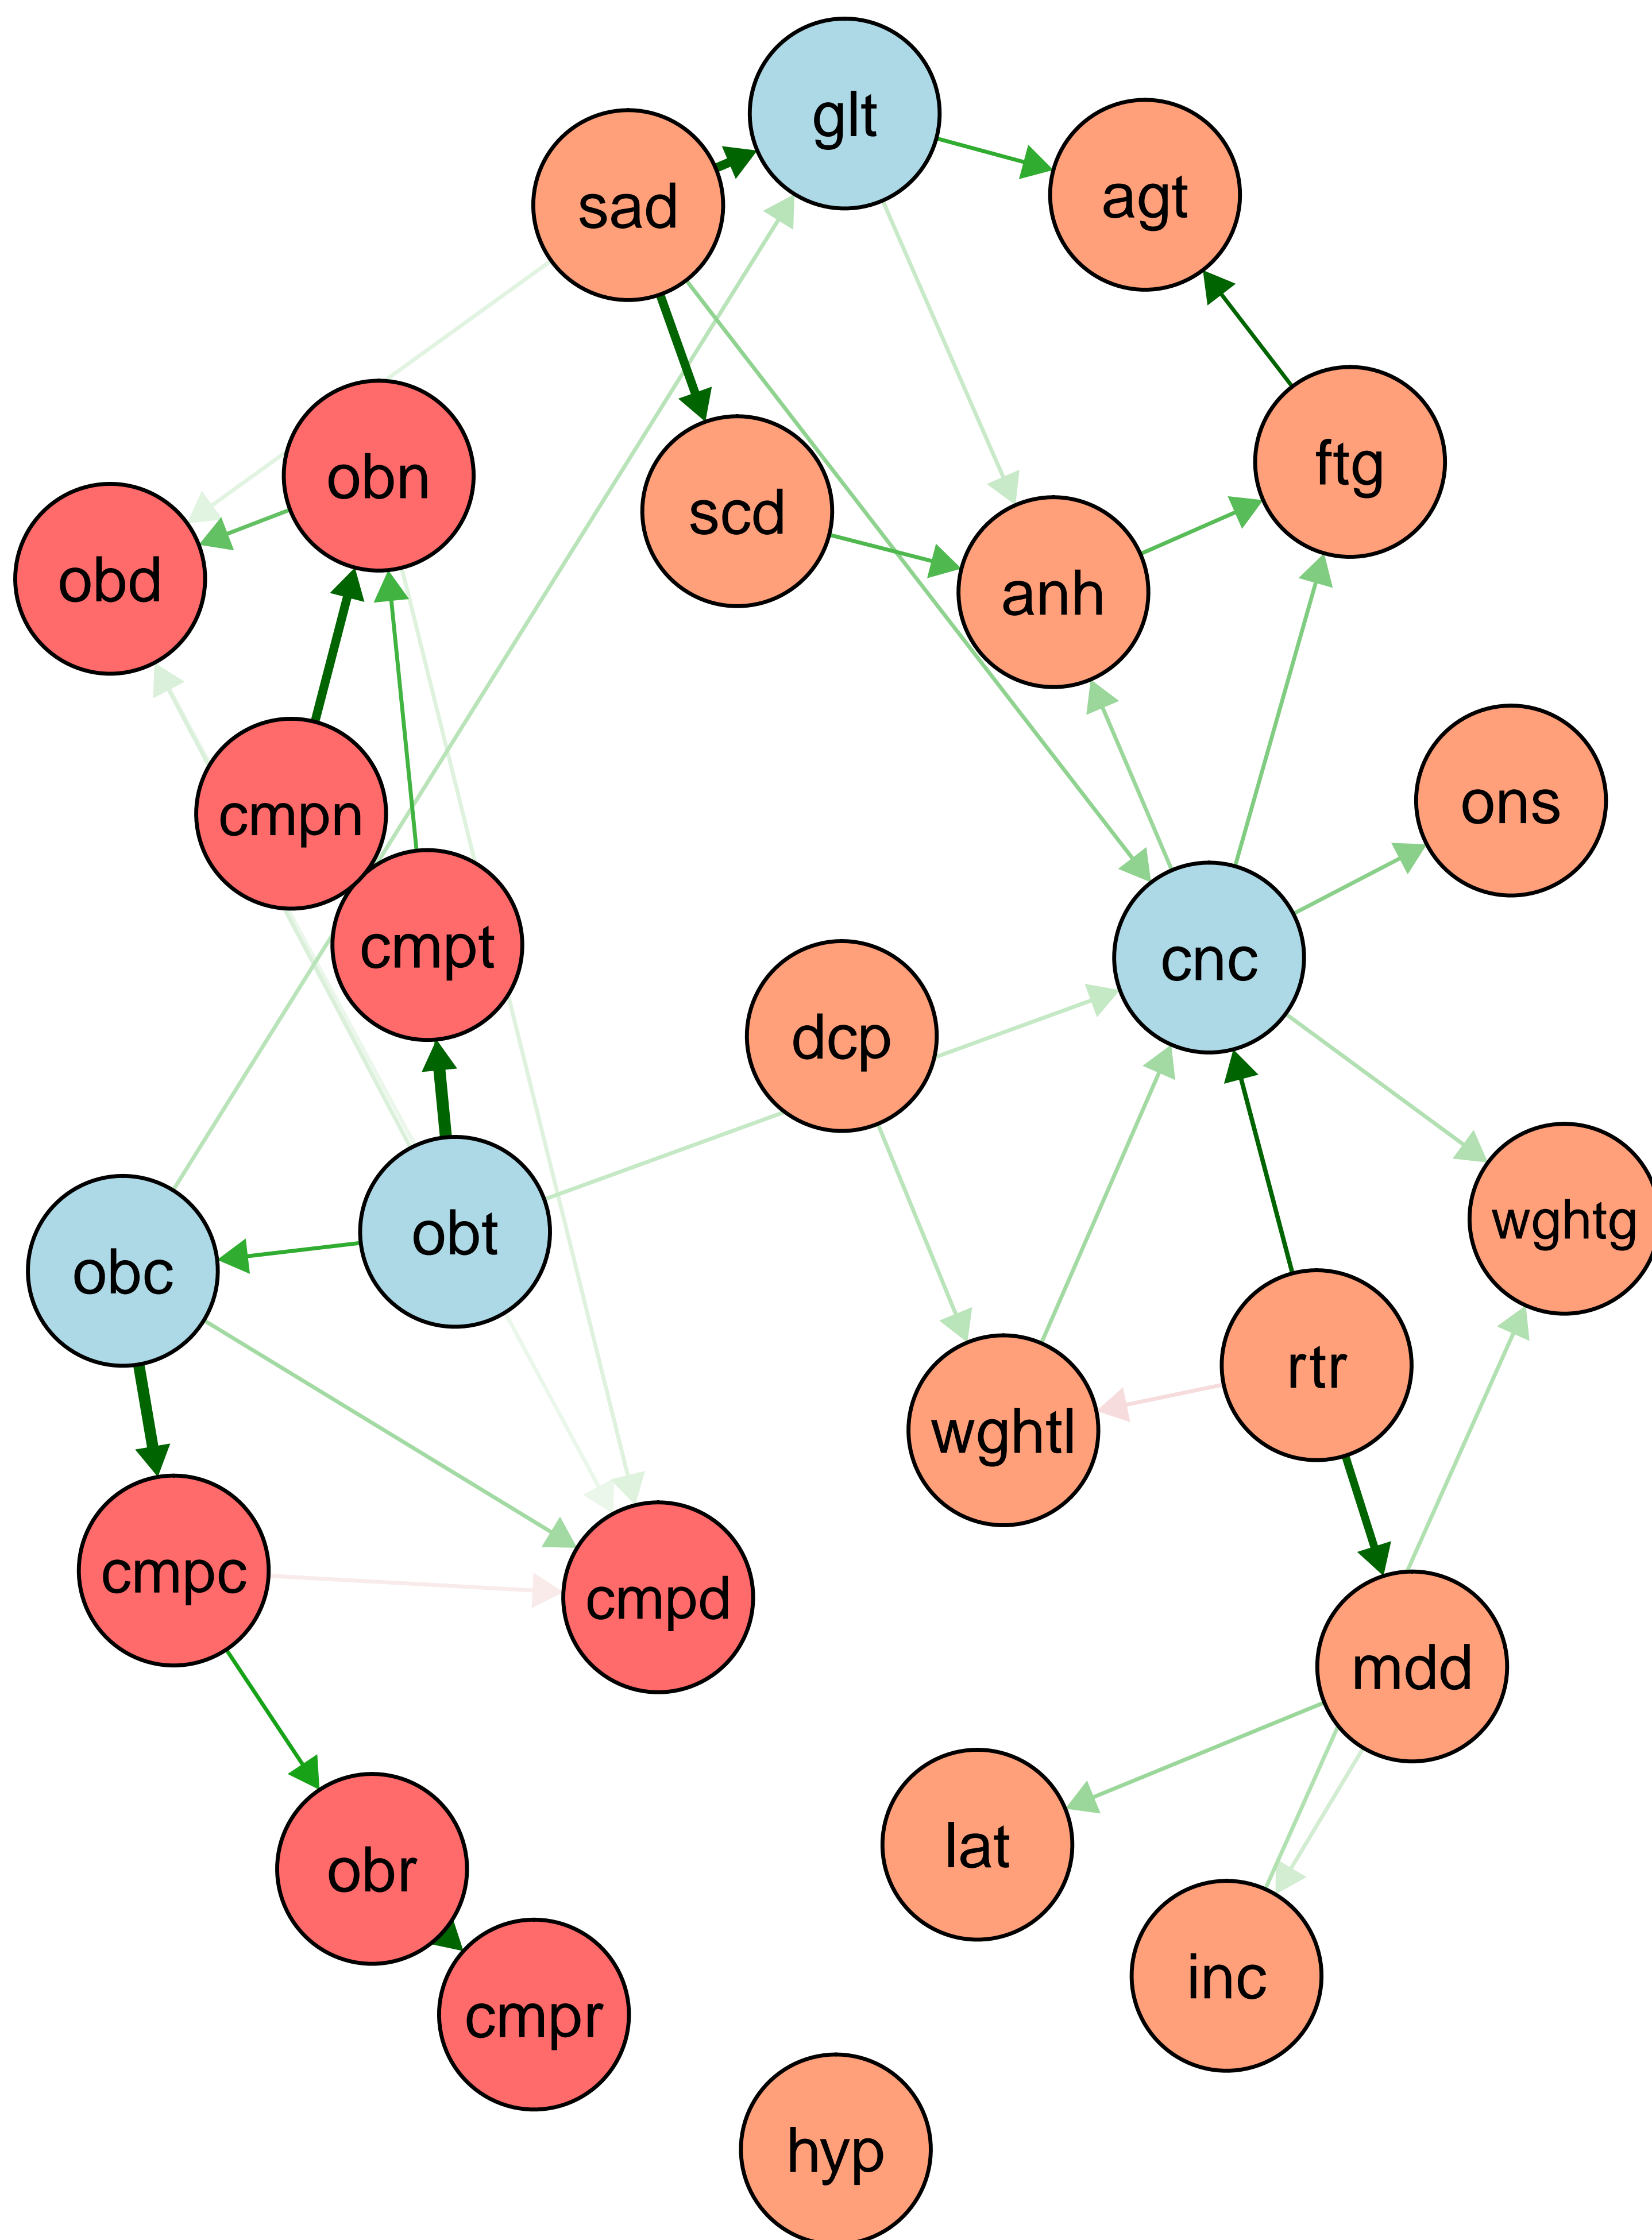

Supplement: Supplementary file 7 [file 2]
