# Supplementary material
Source: publisher figshare collection journal article supplement (https://tandf.figshare.com/articles/dataset/_/8248073)

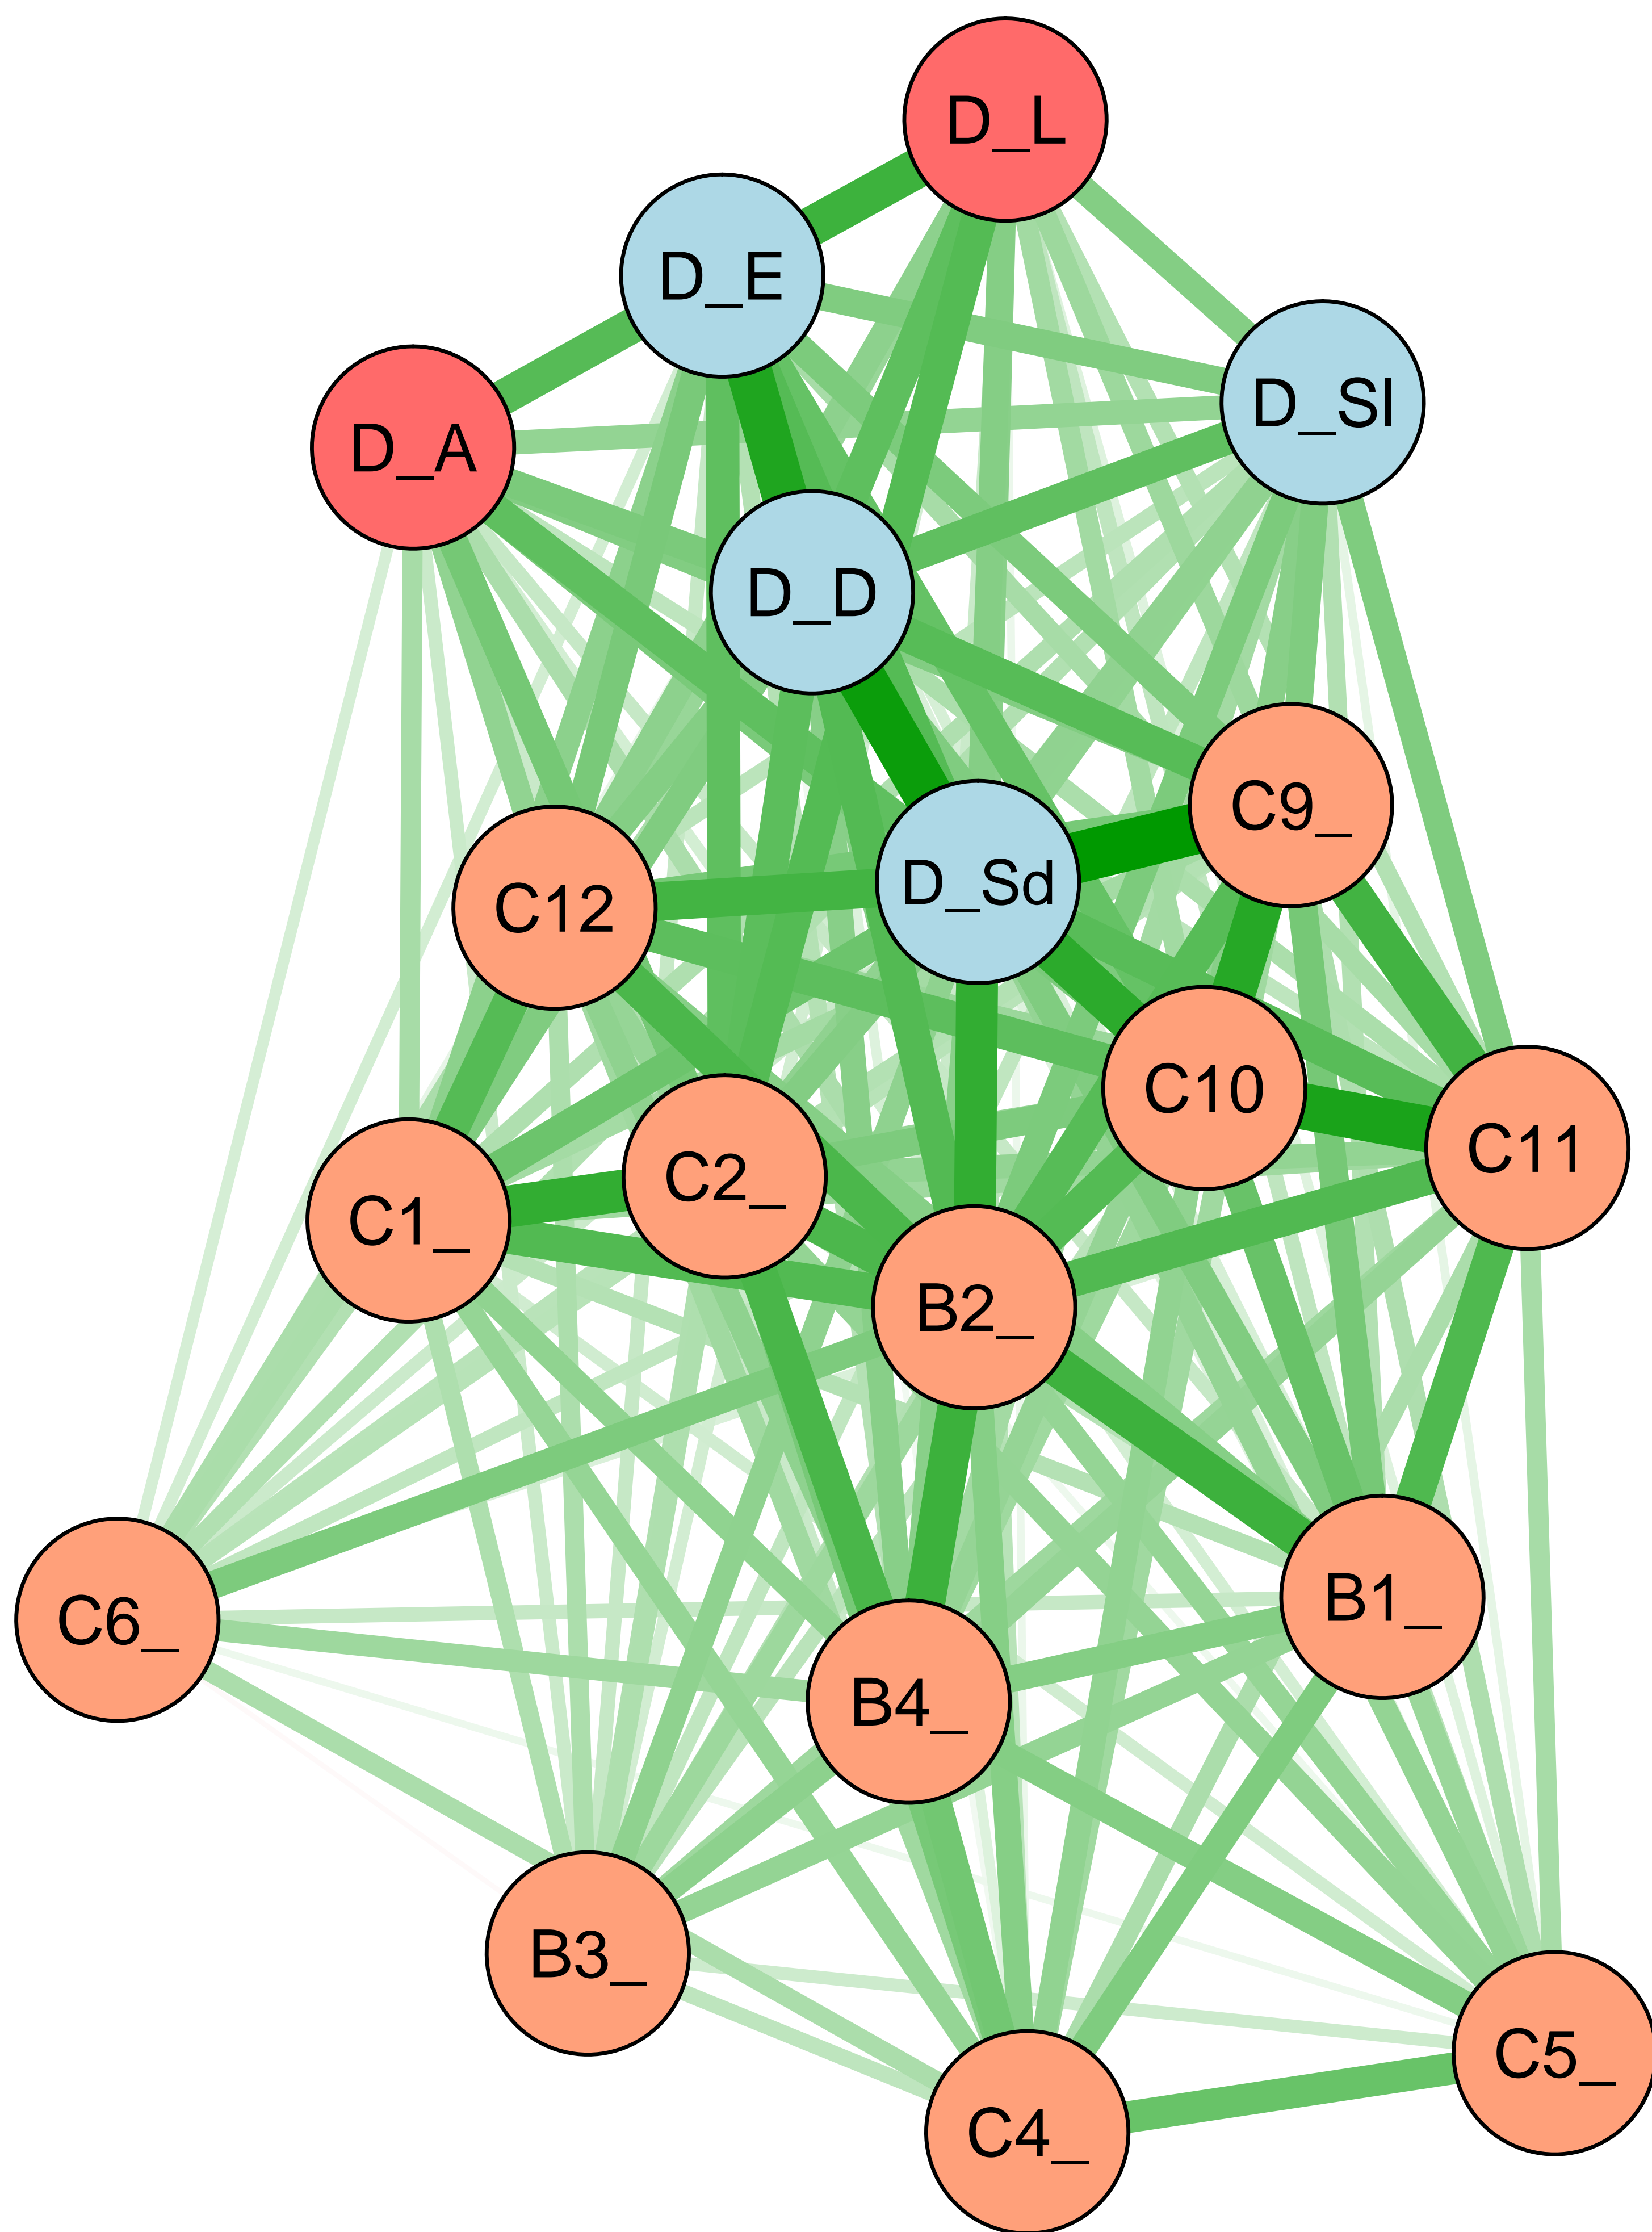

Supplement: Supplementary file 1 [file 2]

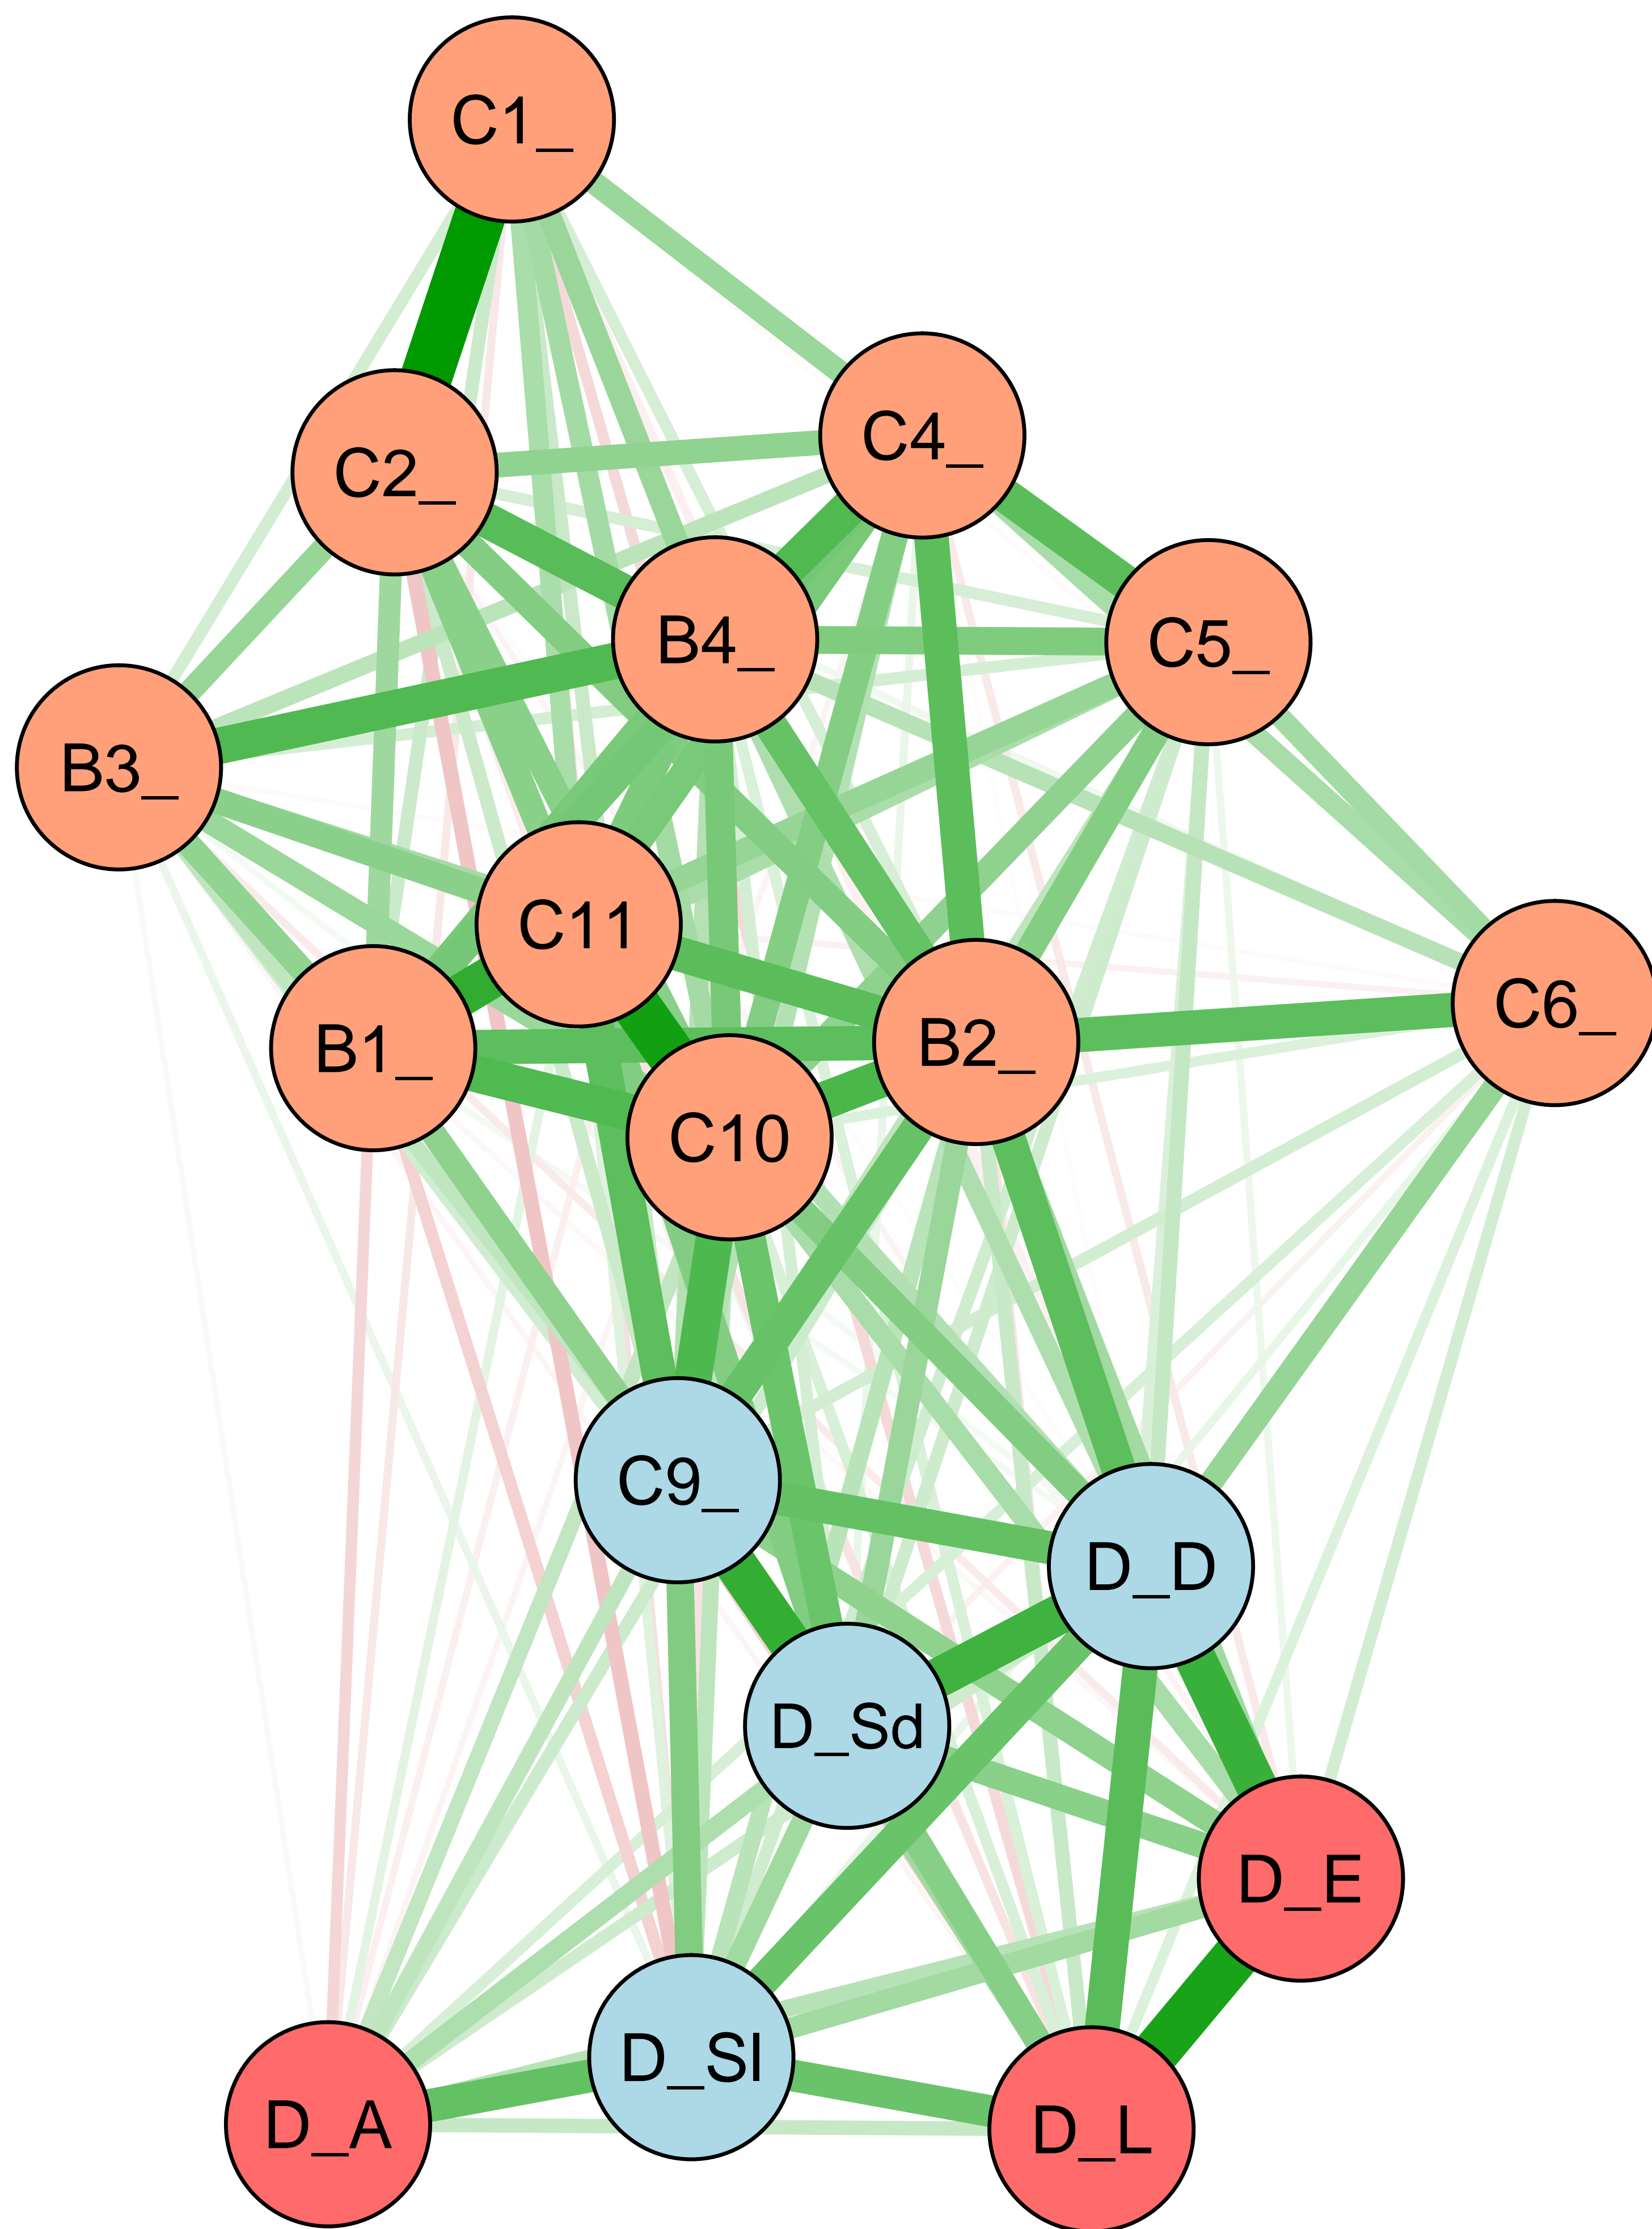

- PCBD
- Bridge
- Depression

Supplement: Supplementary file 2 [file 2]

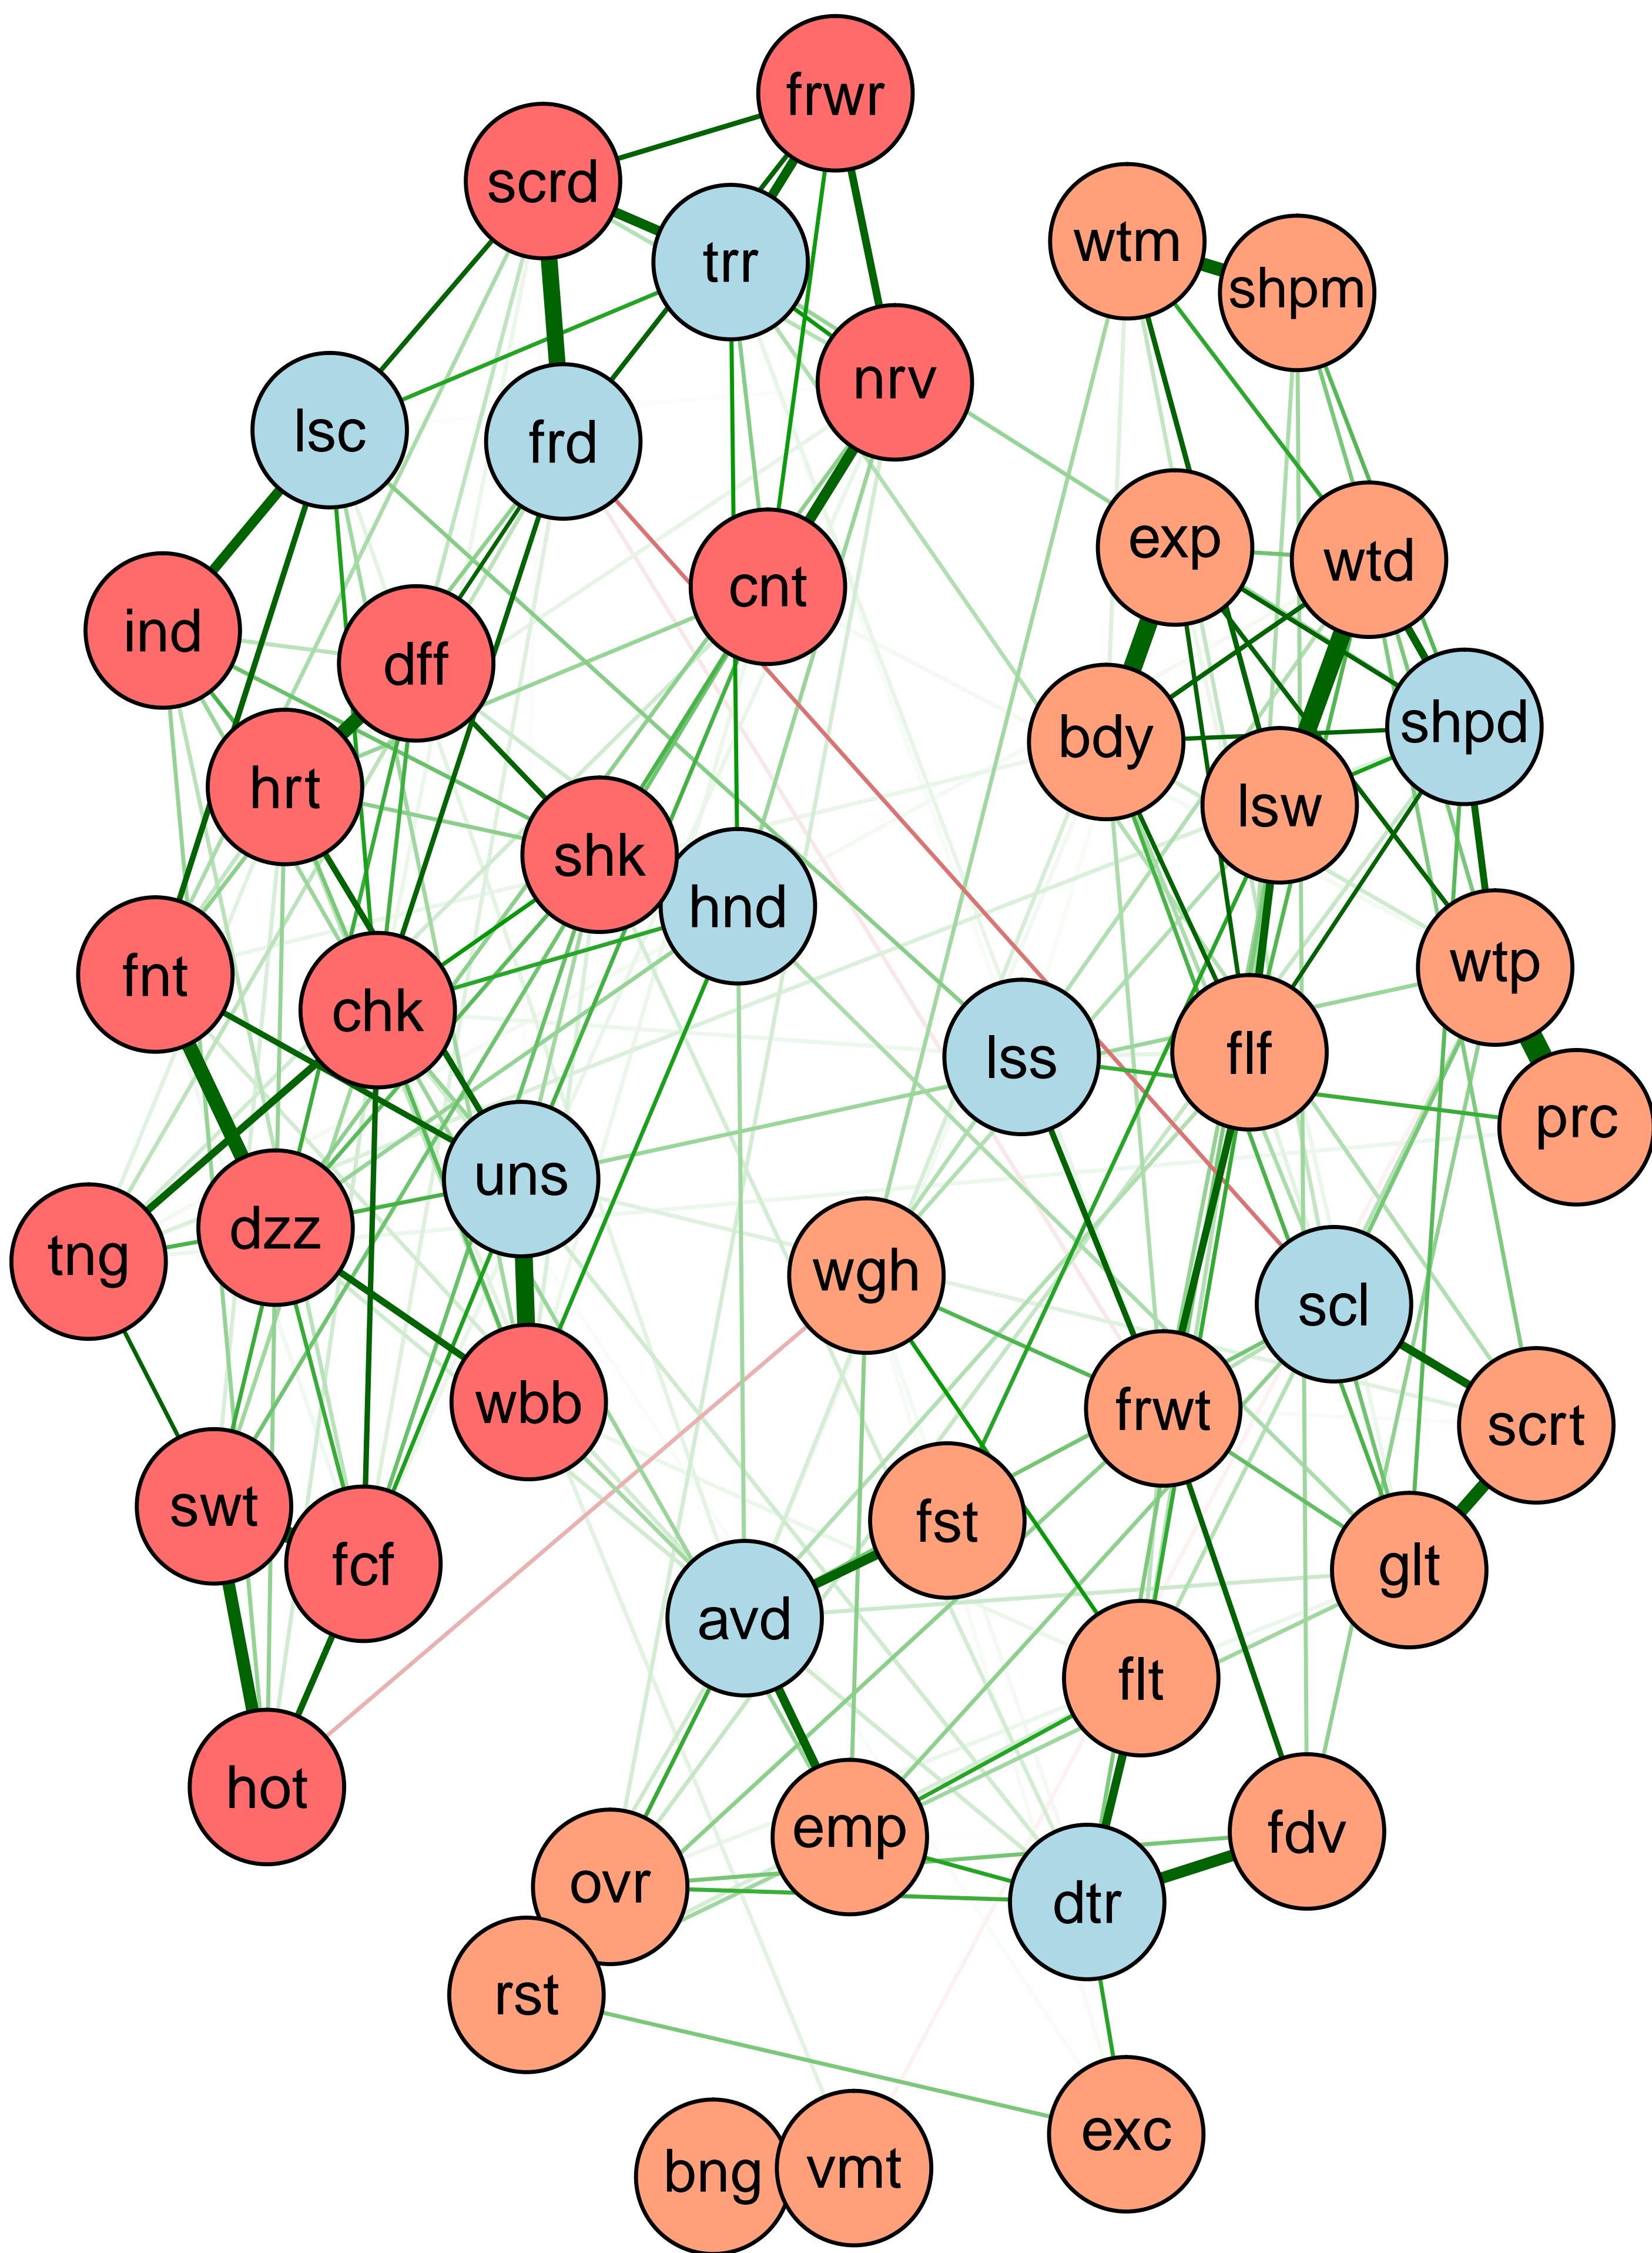

Supplement: Supplementary file 3 [file 2]

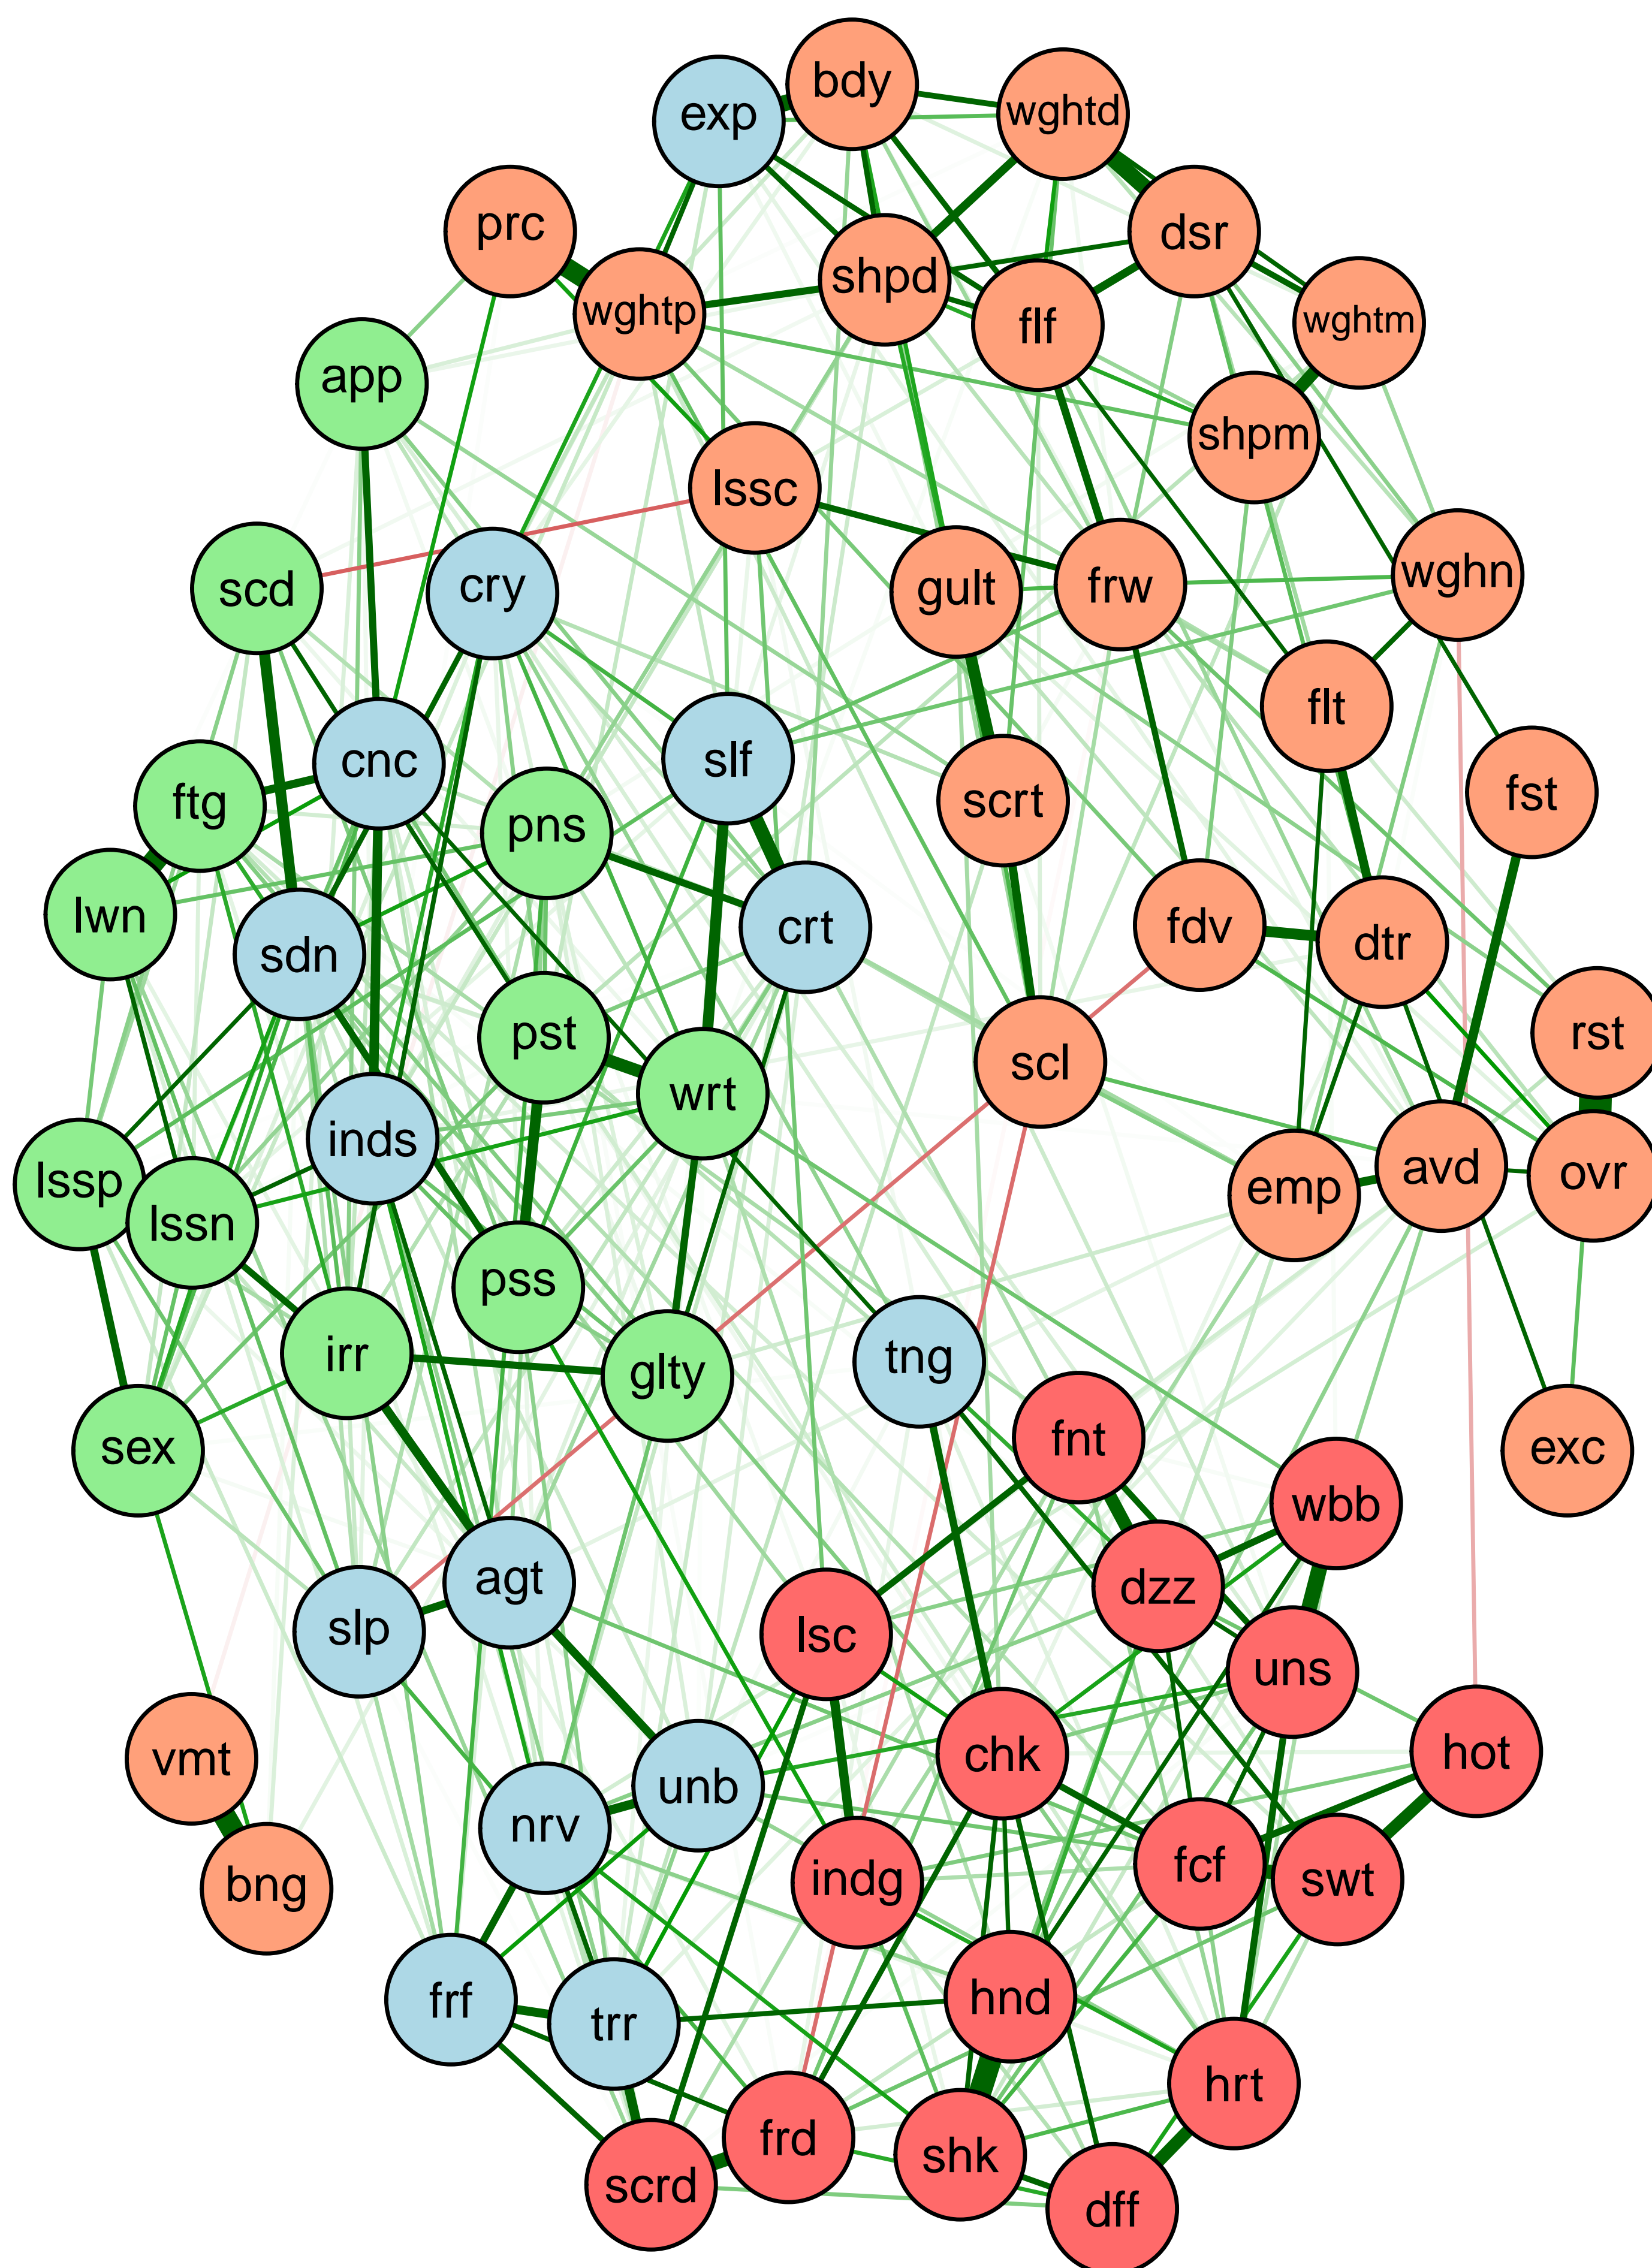

- Bulimia
- Bridge
- Anxiety
- Depression

Supplement: Supplementary file 4 [file 2]

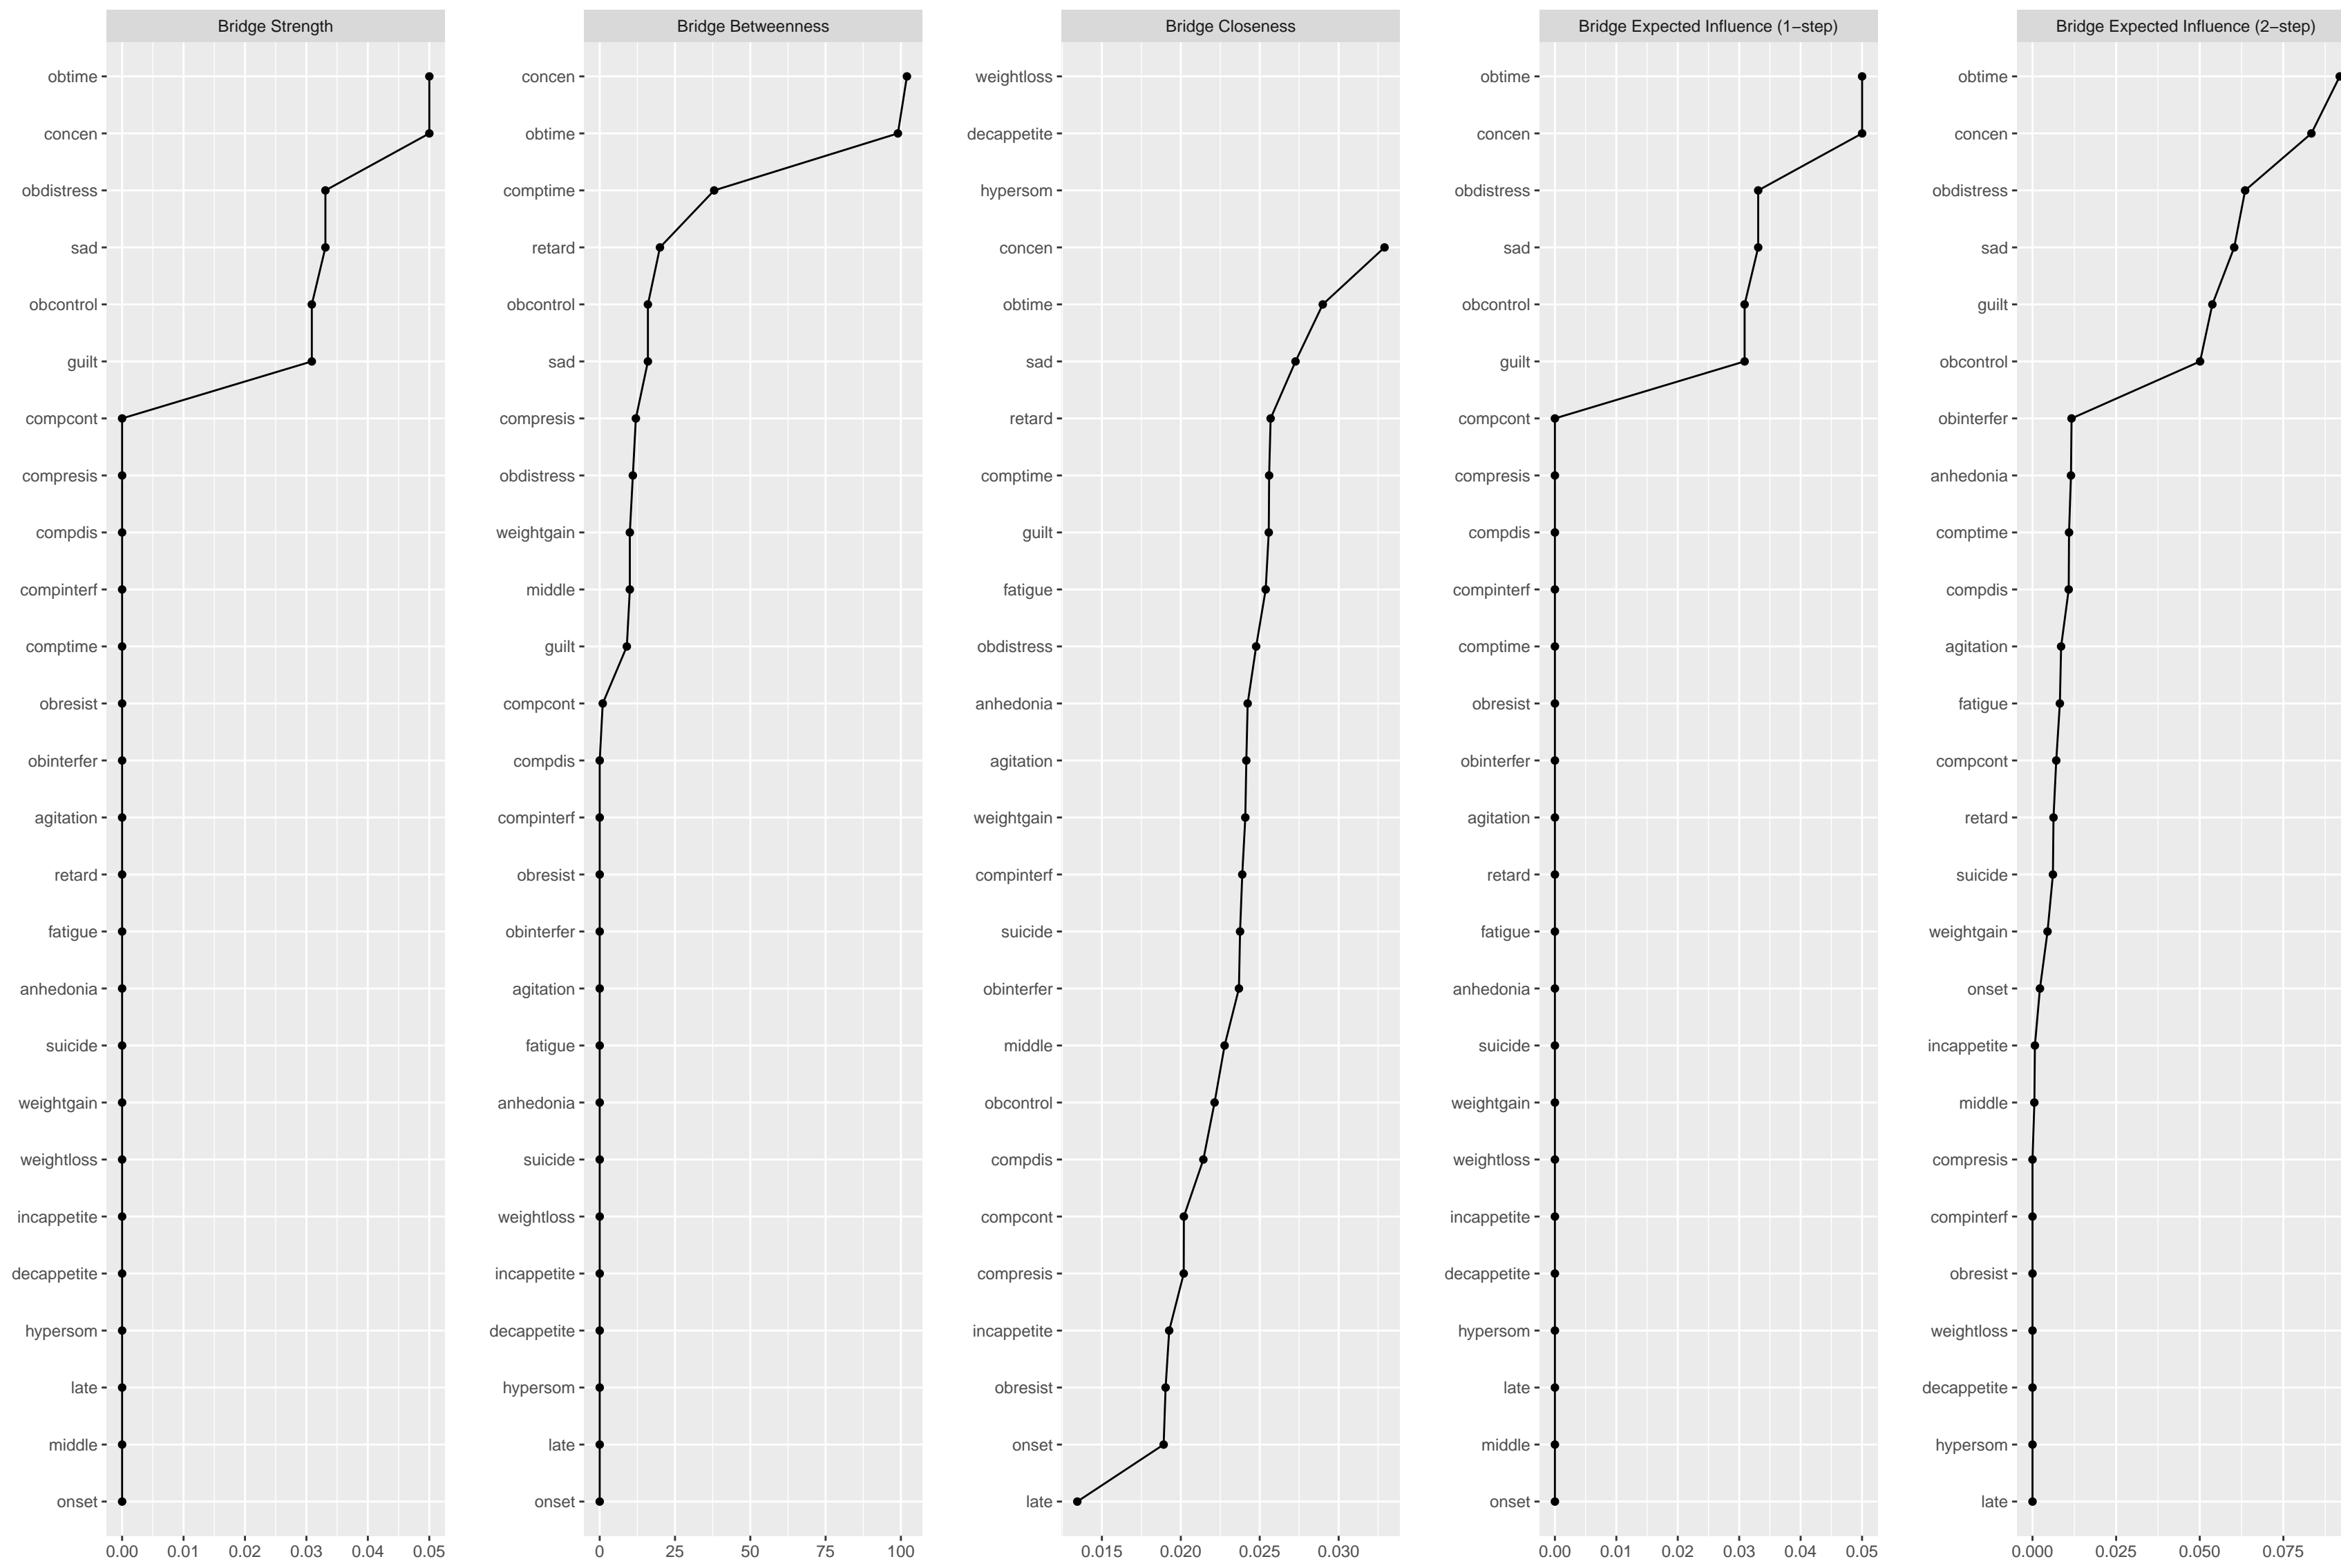

Supplement: Supplementary file 5 [file 2]

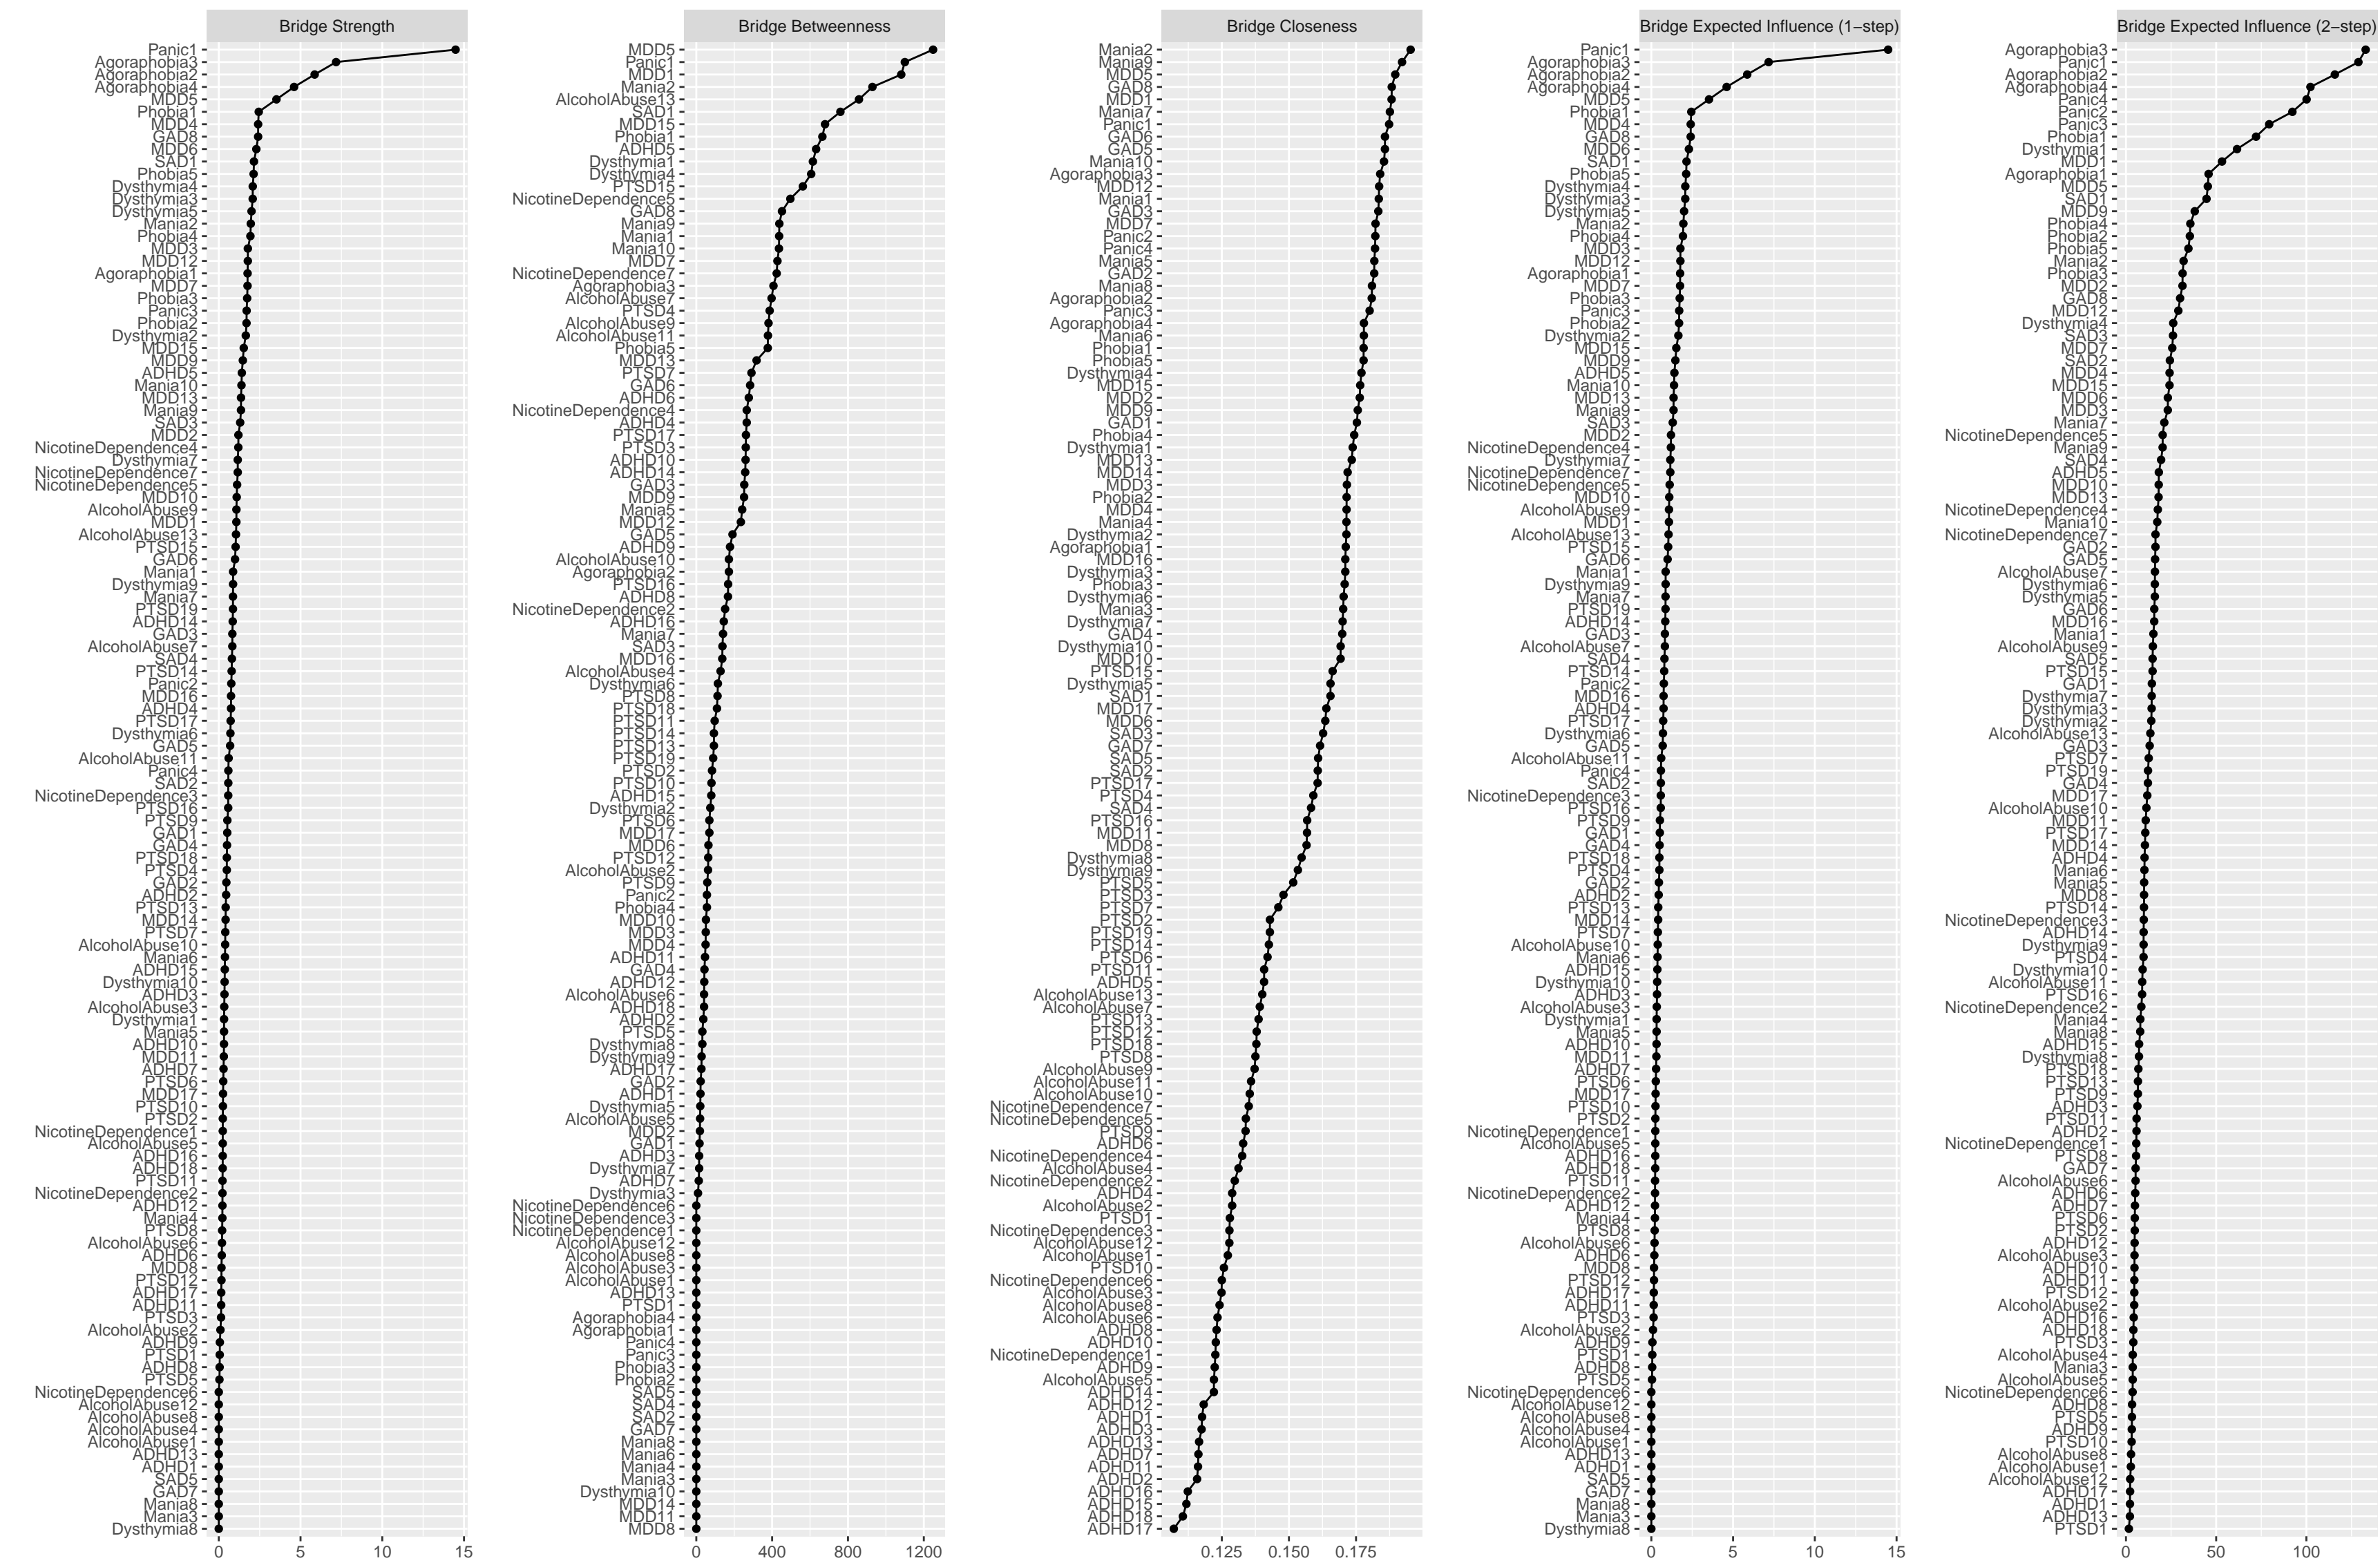

Supplement: Supplementary file 6 [file 2]

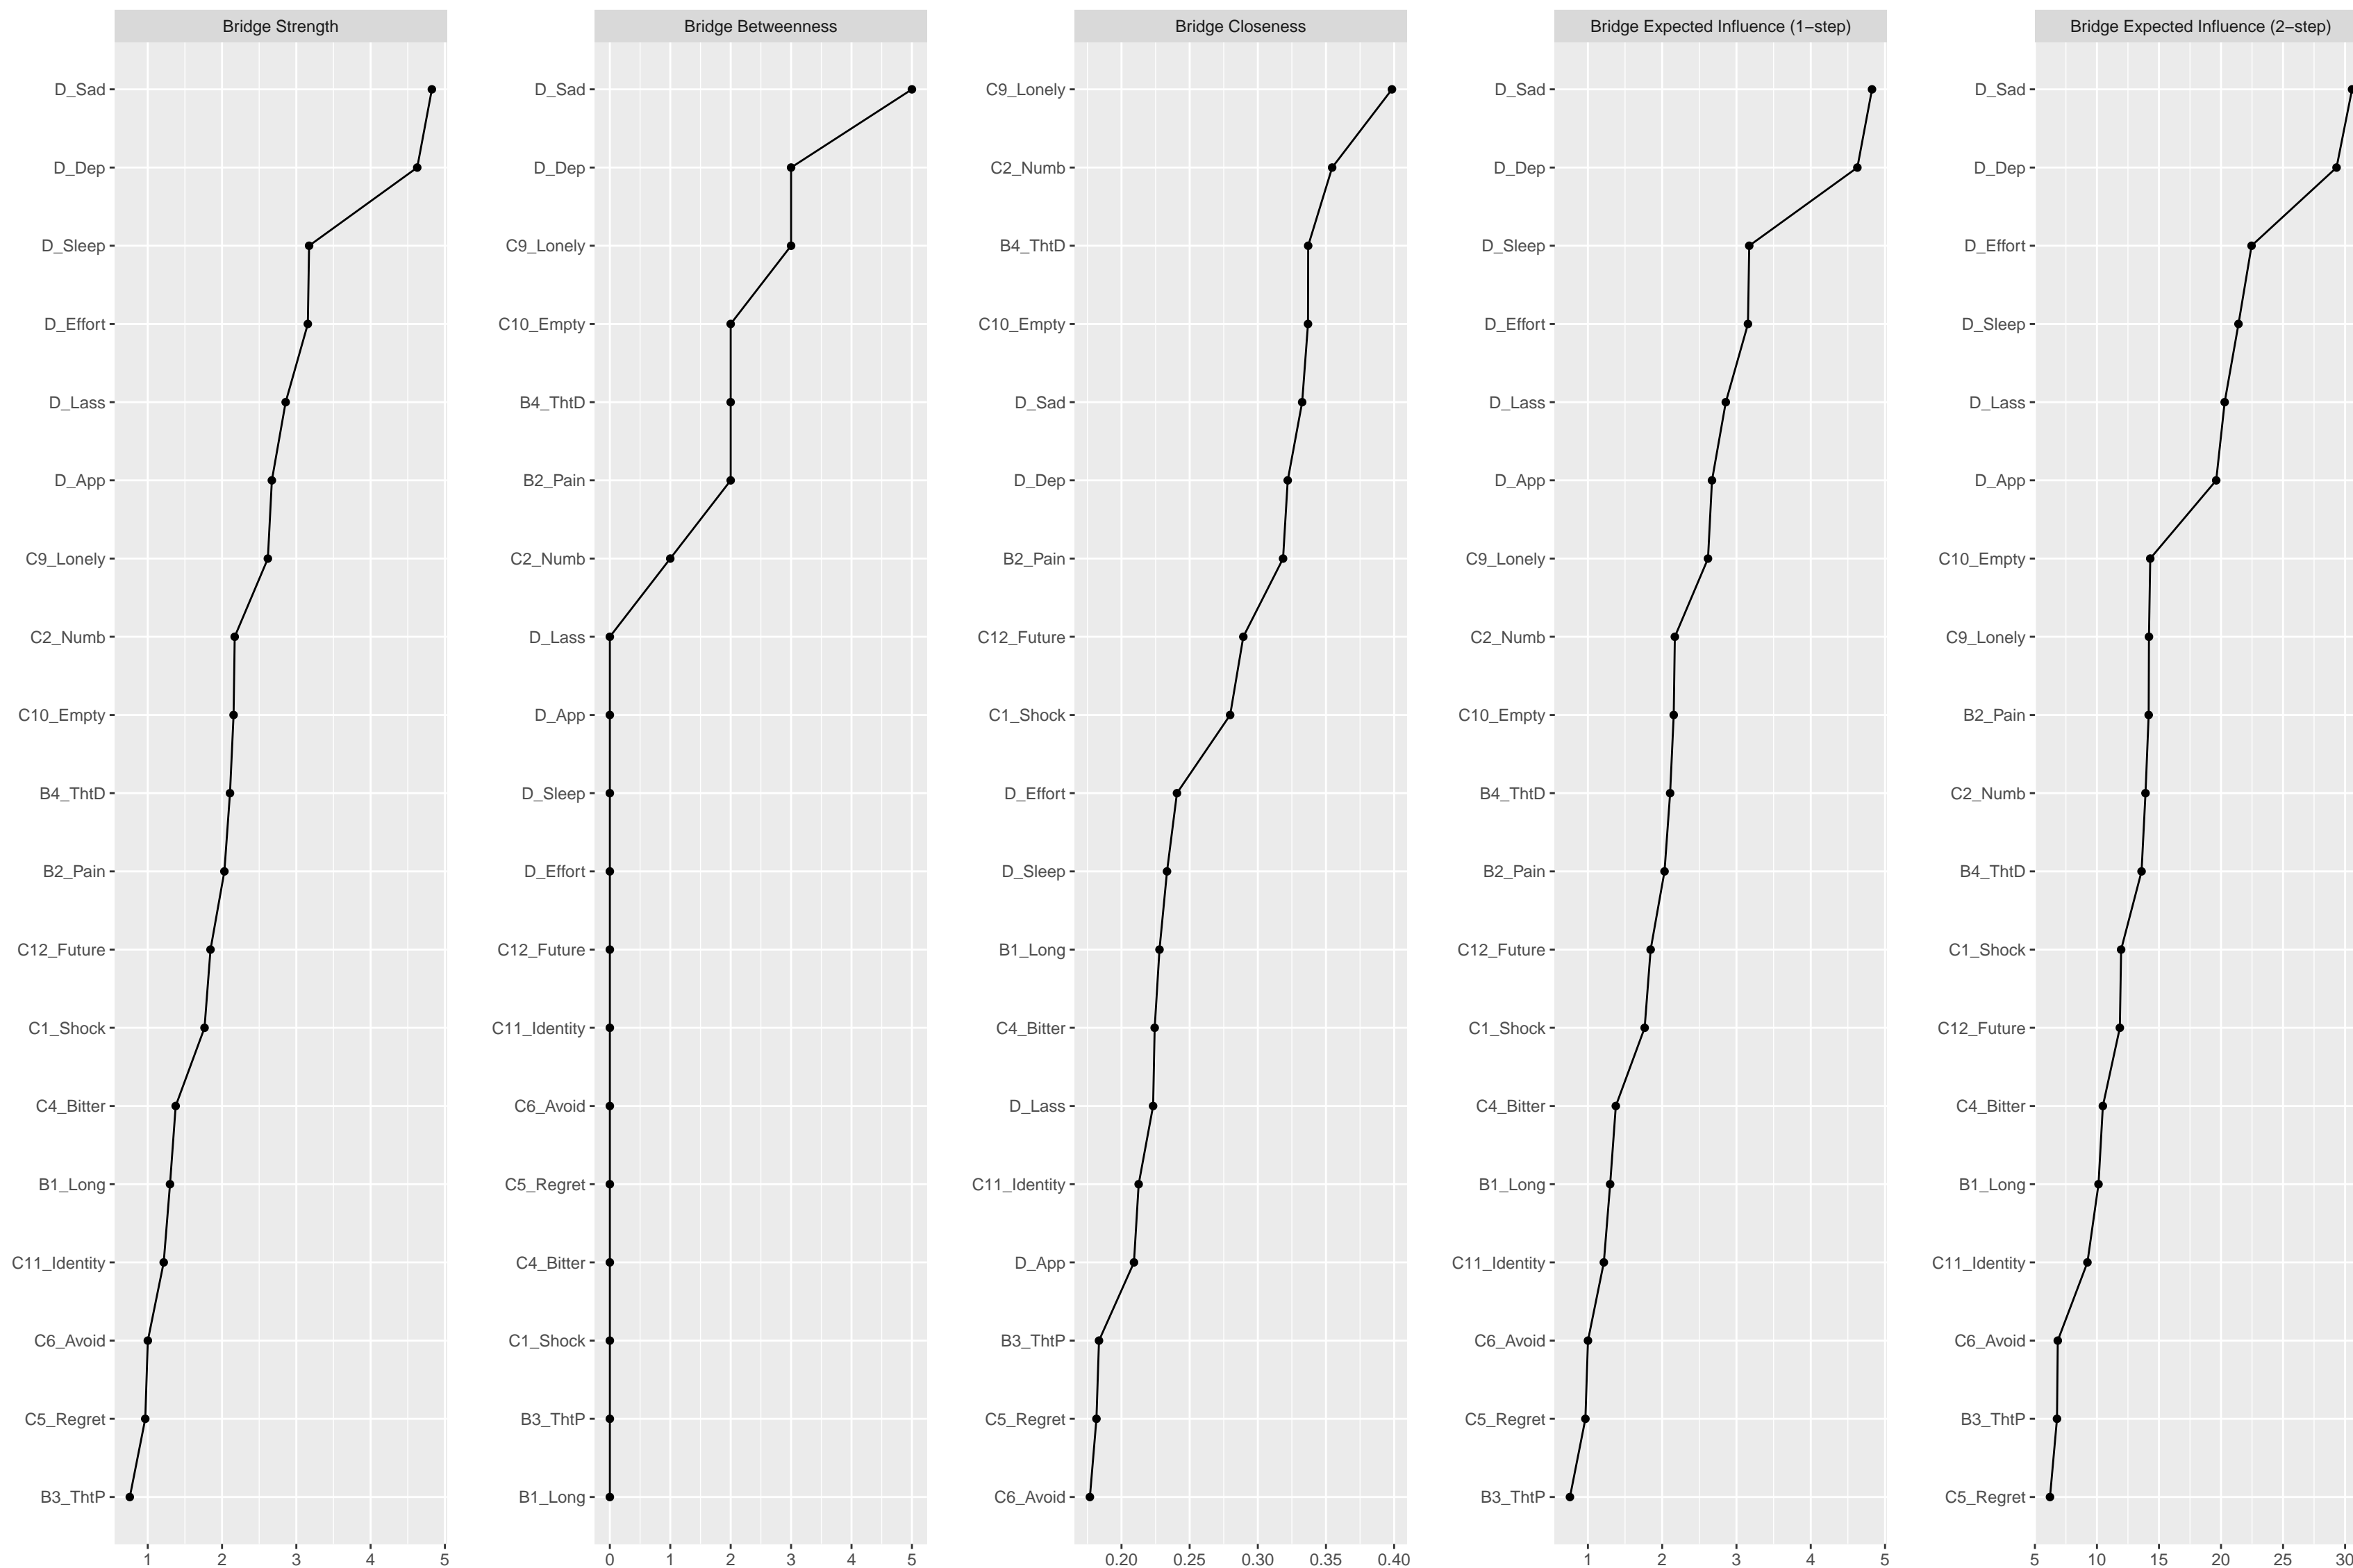

Supplement: Supplementary file 10 [file 2]

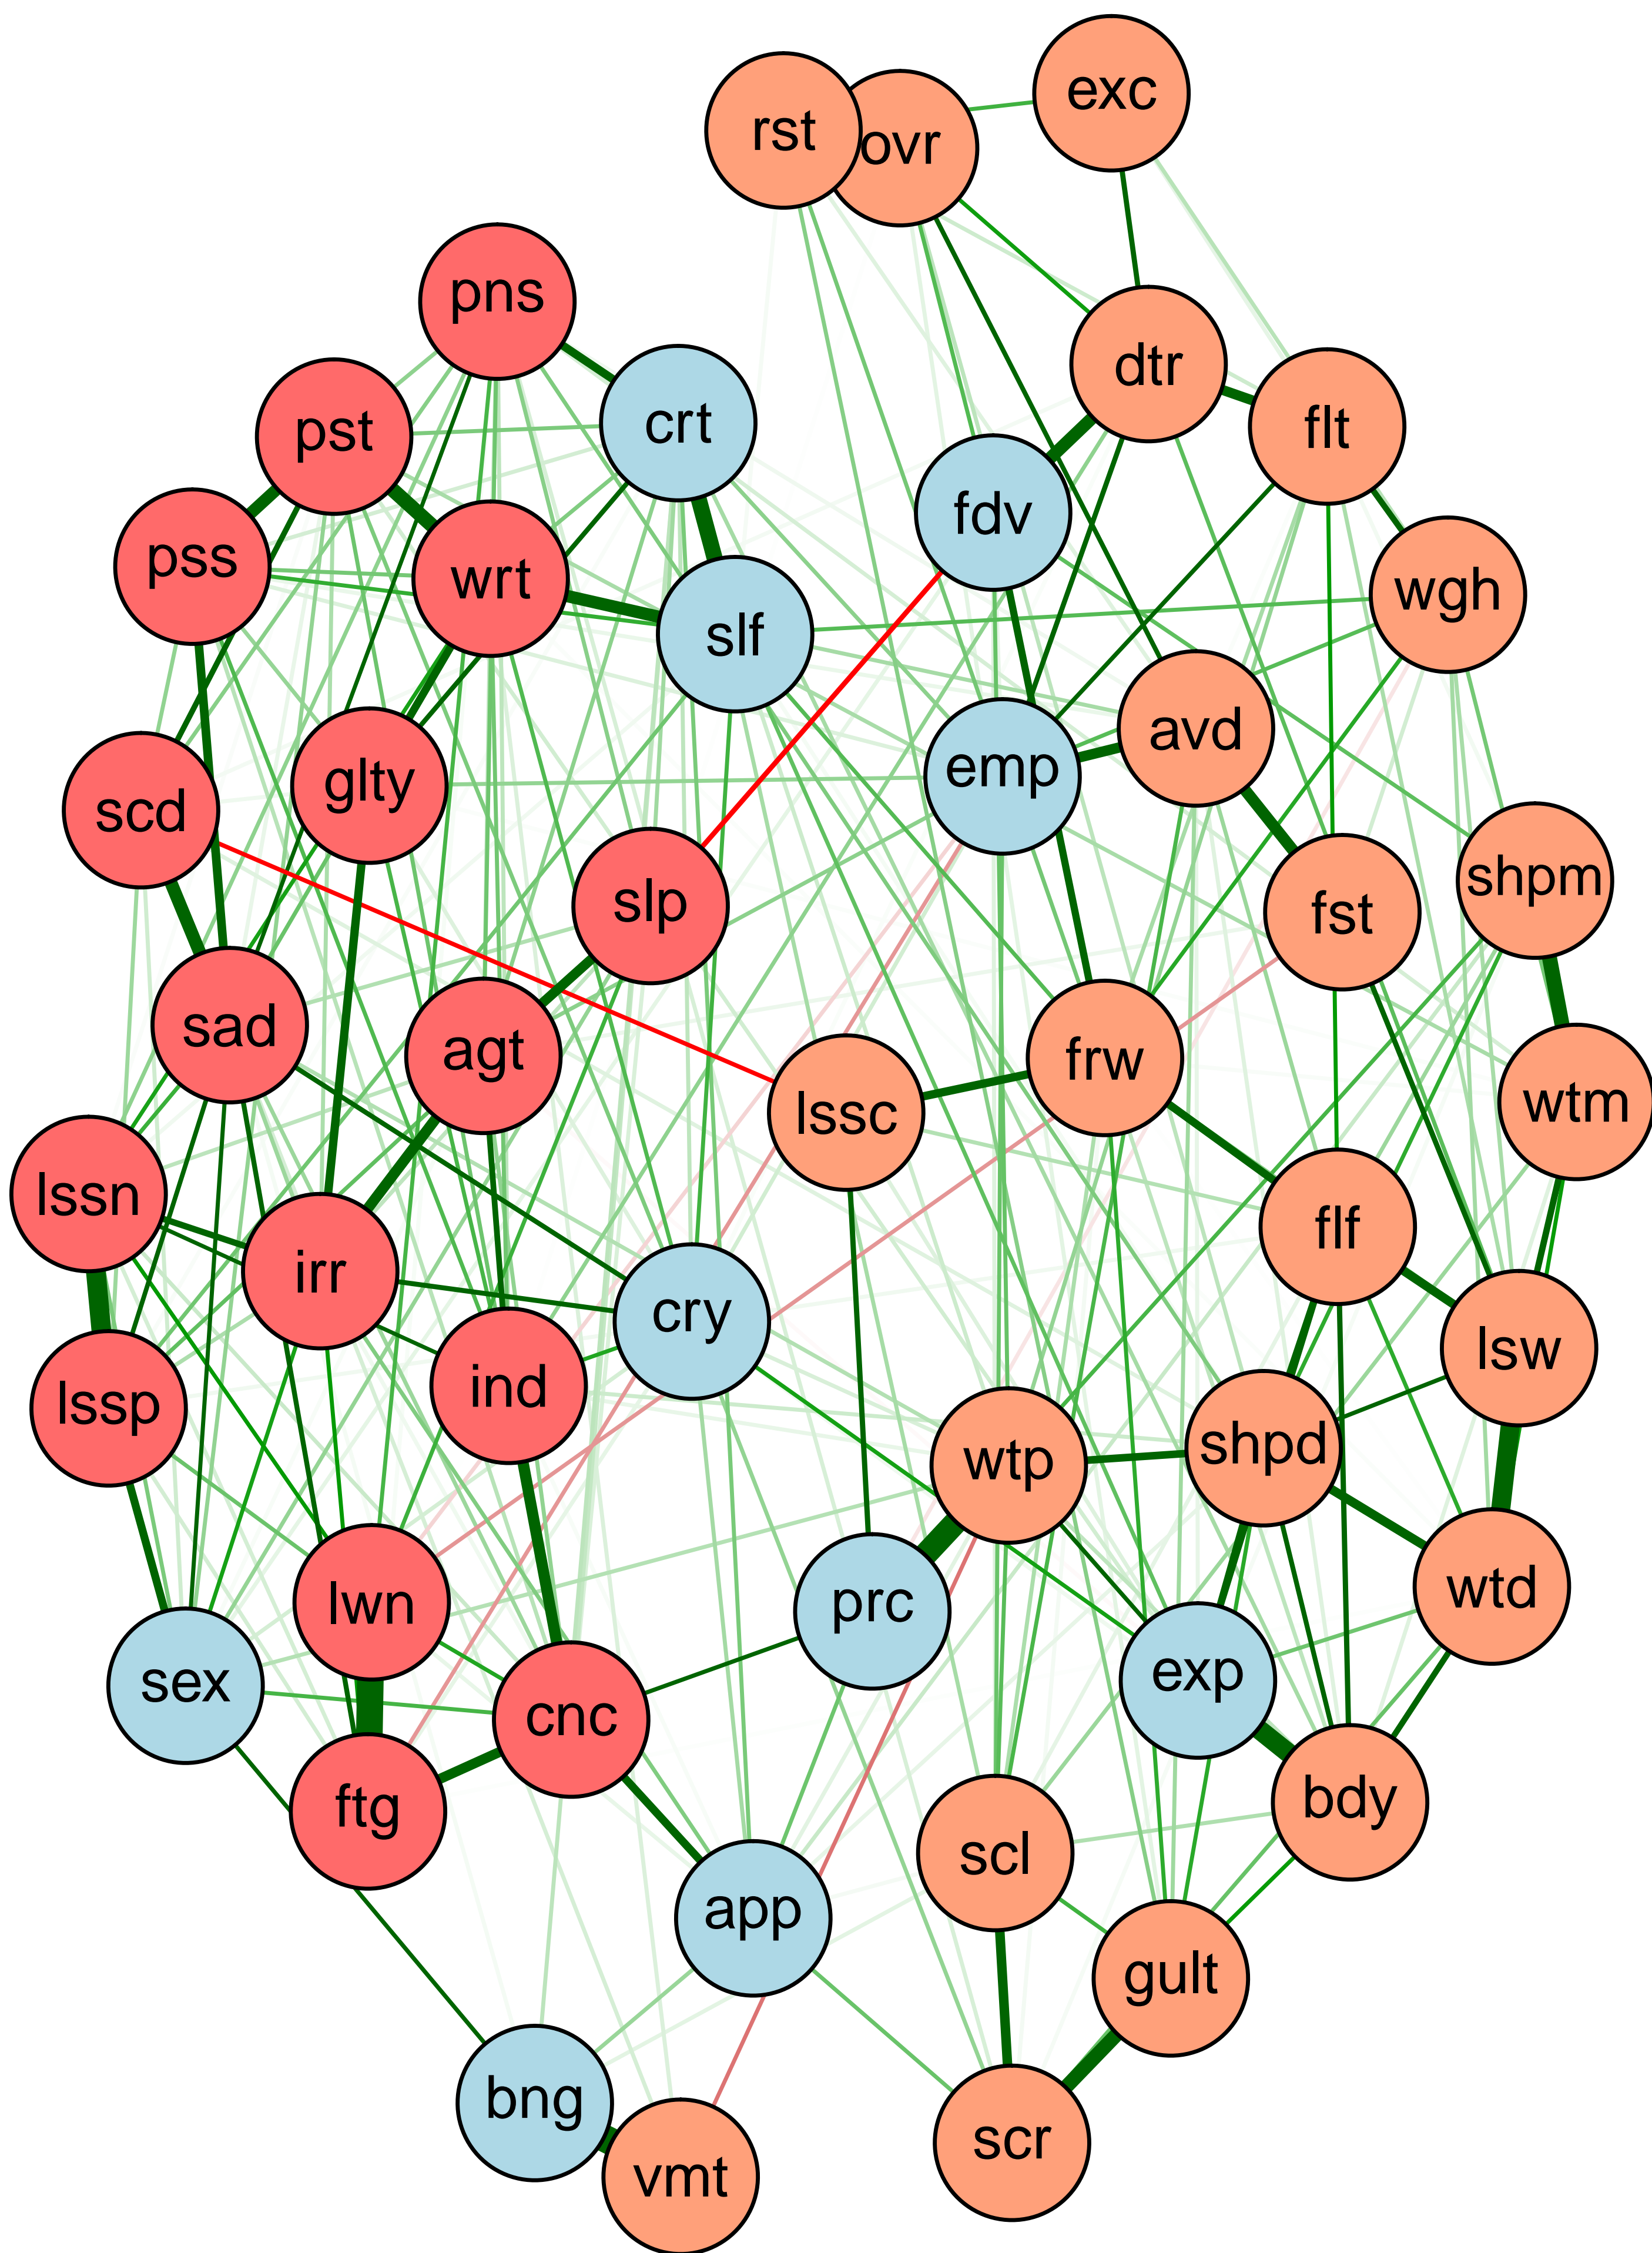

● Bulimia  
● Bridge  
● Depression

Supplement: Supplementary file 11 [file 2]

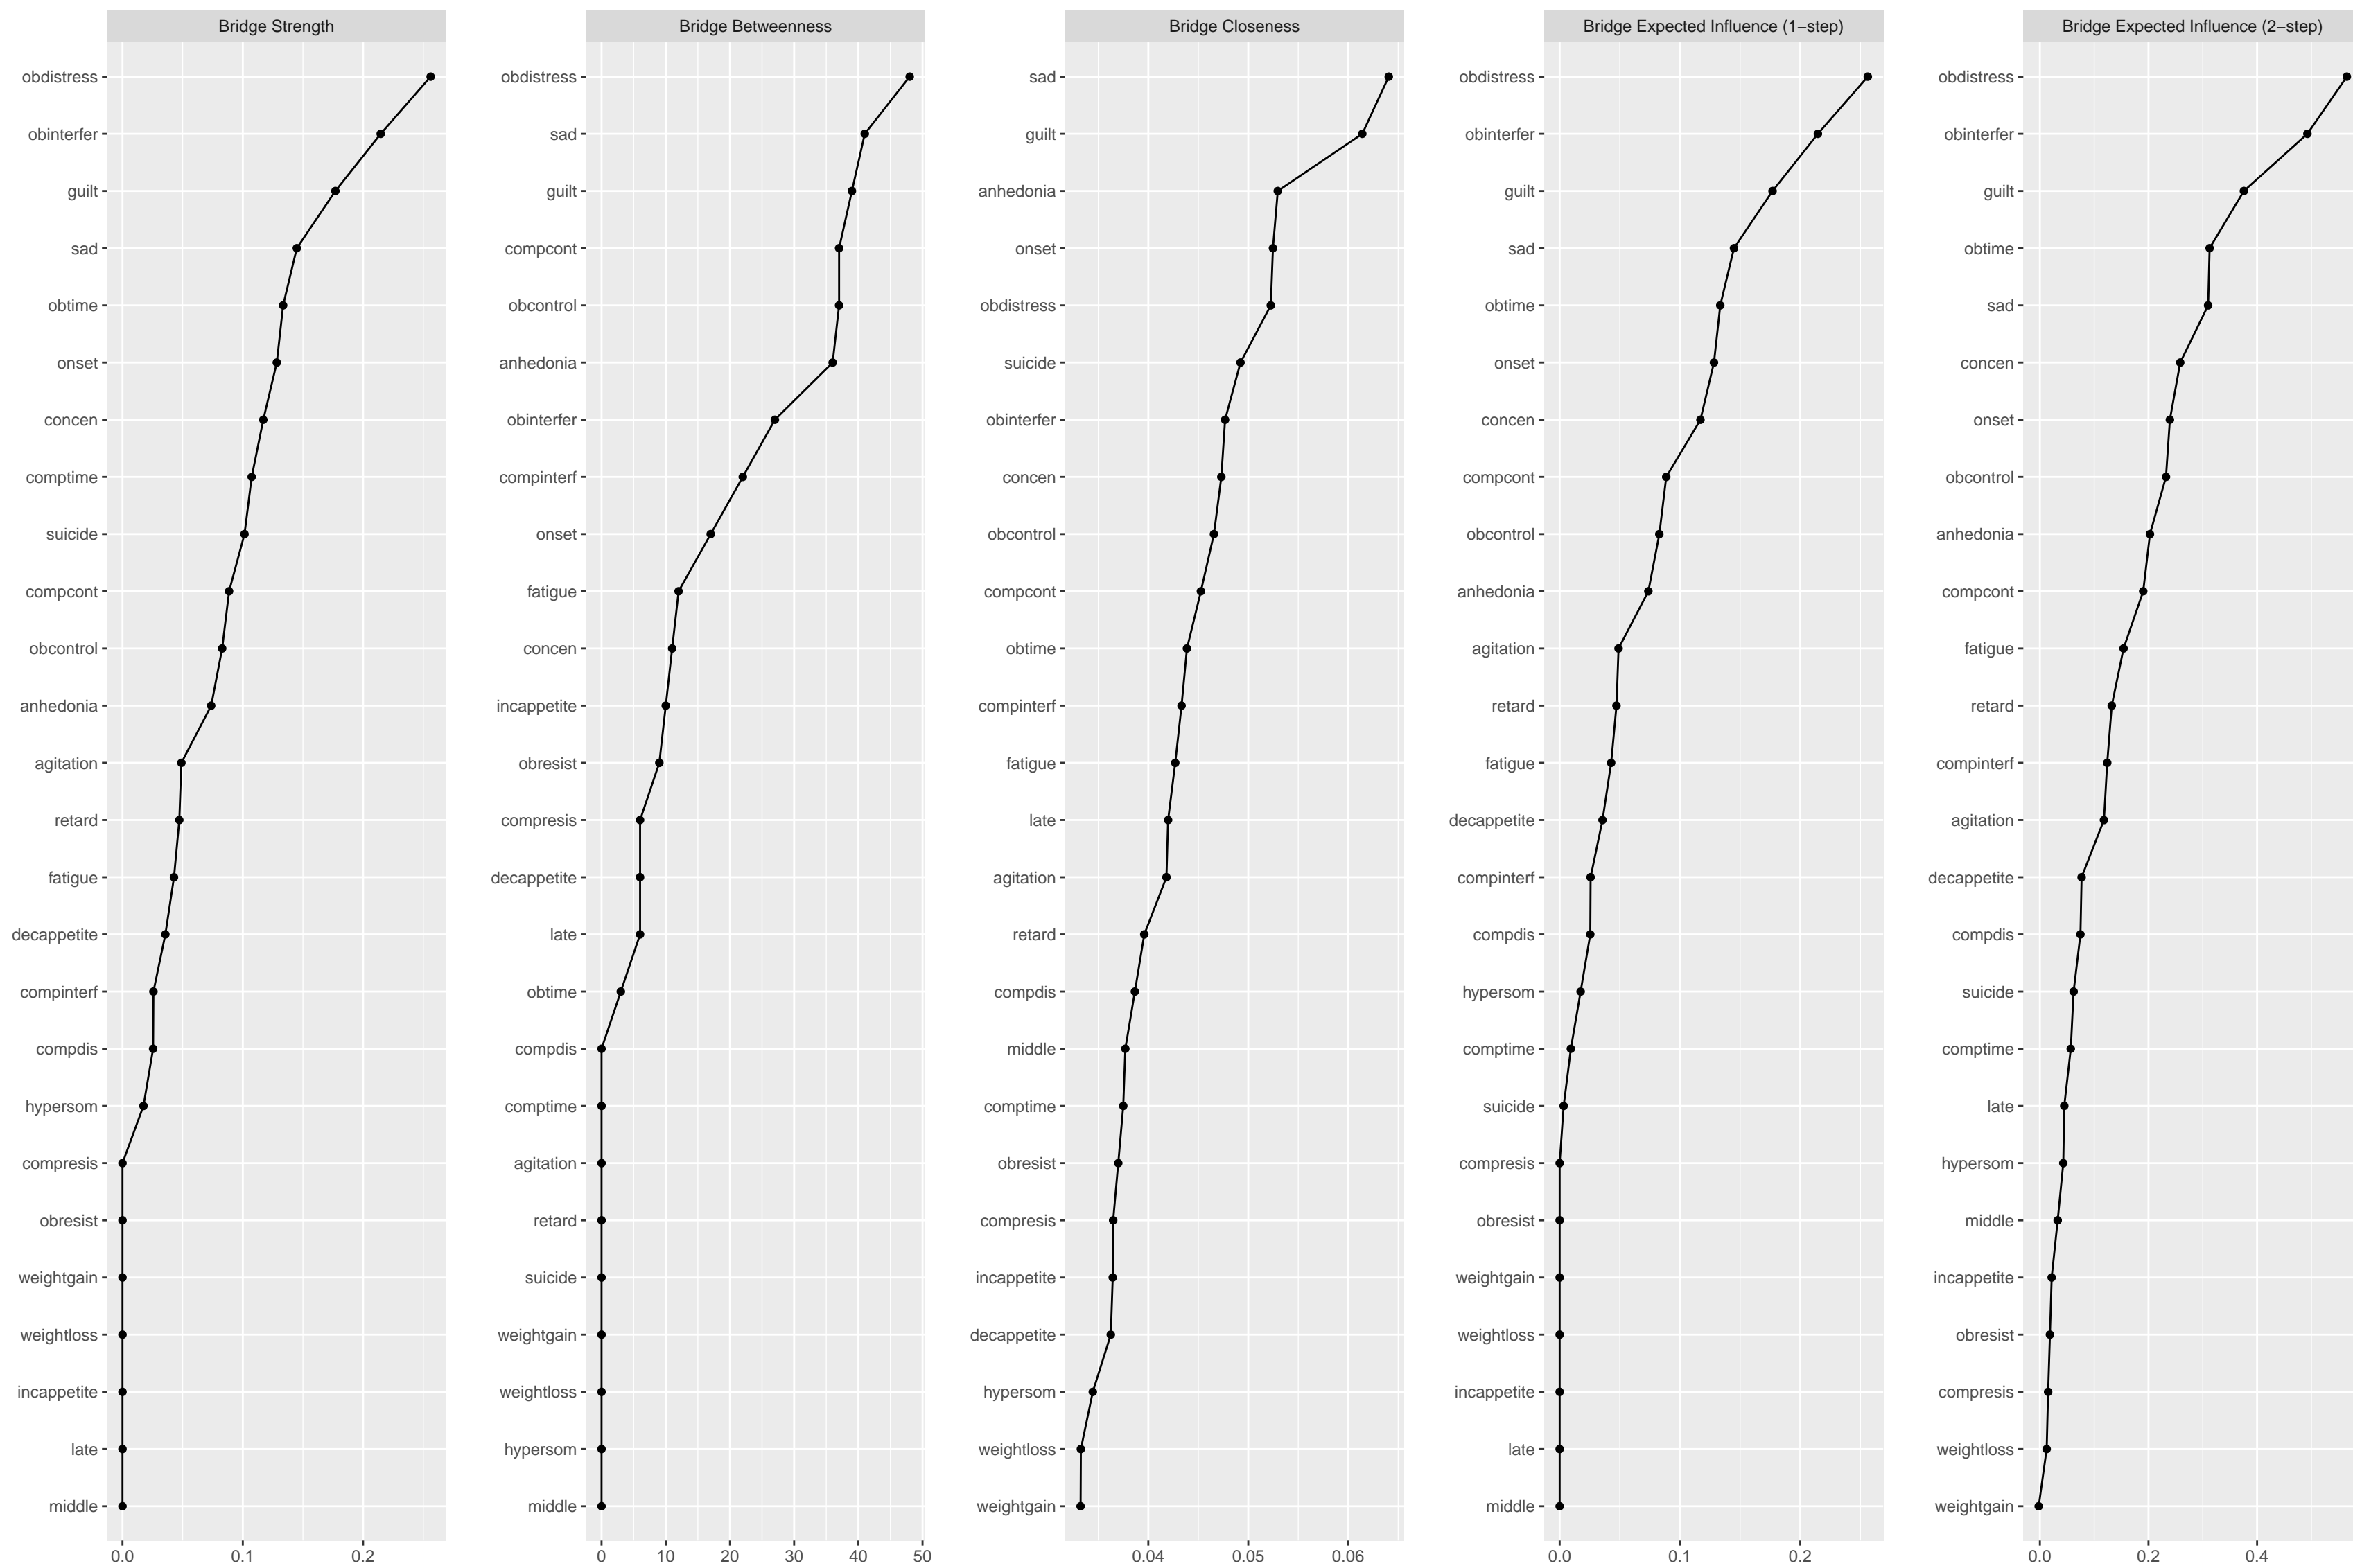

Supplement: Supplementary file 12 [file 2]

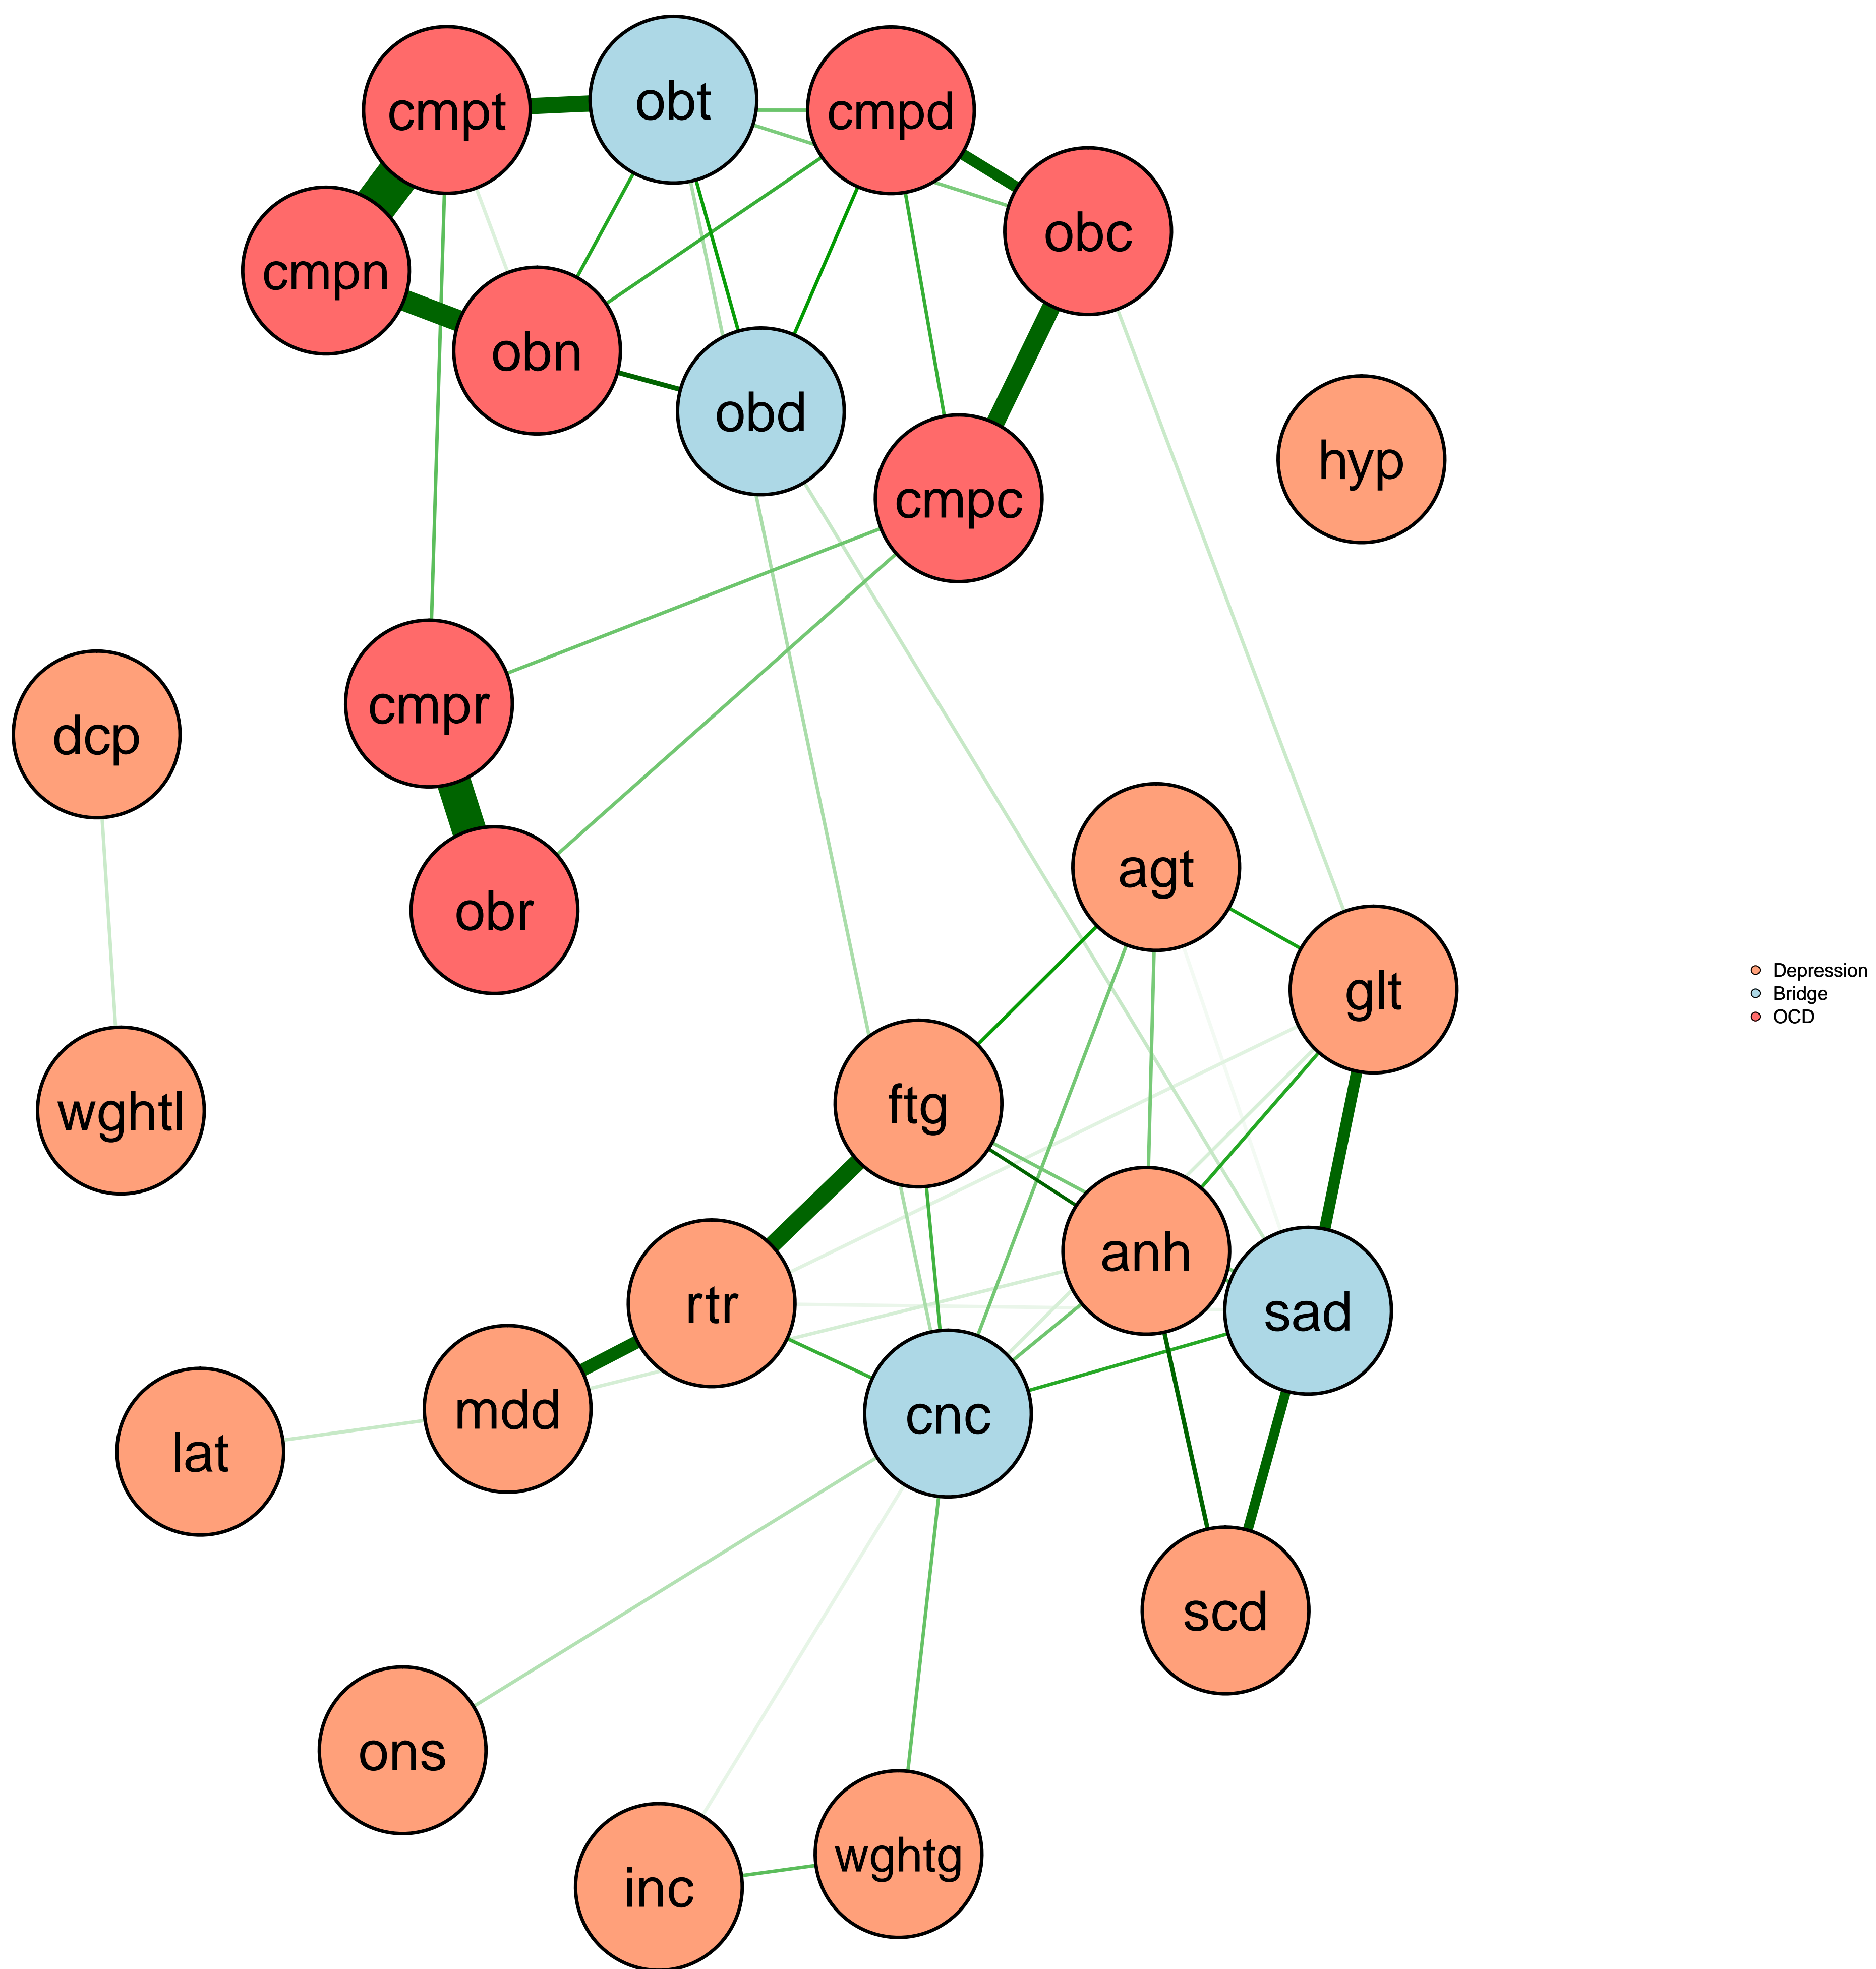

Supplement: Supplementary file 13 [file 2]

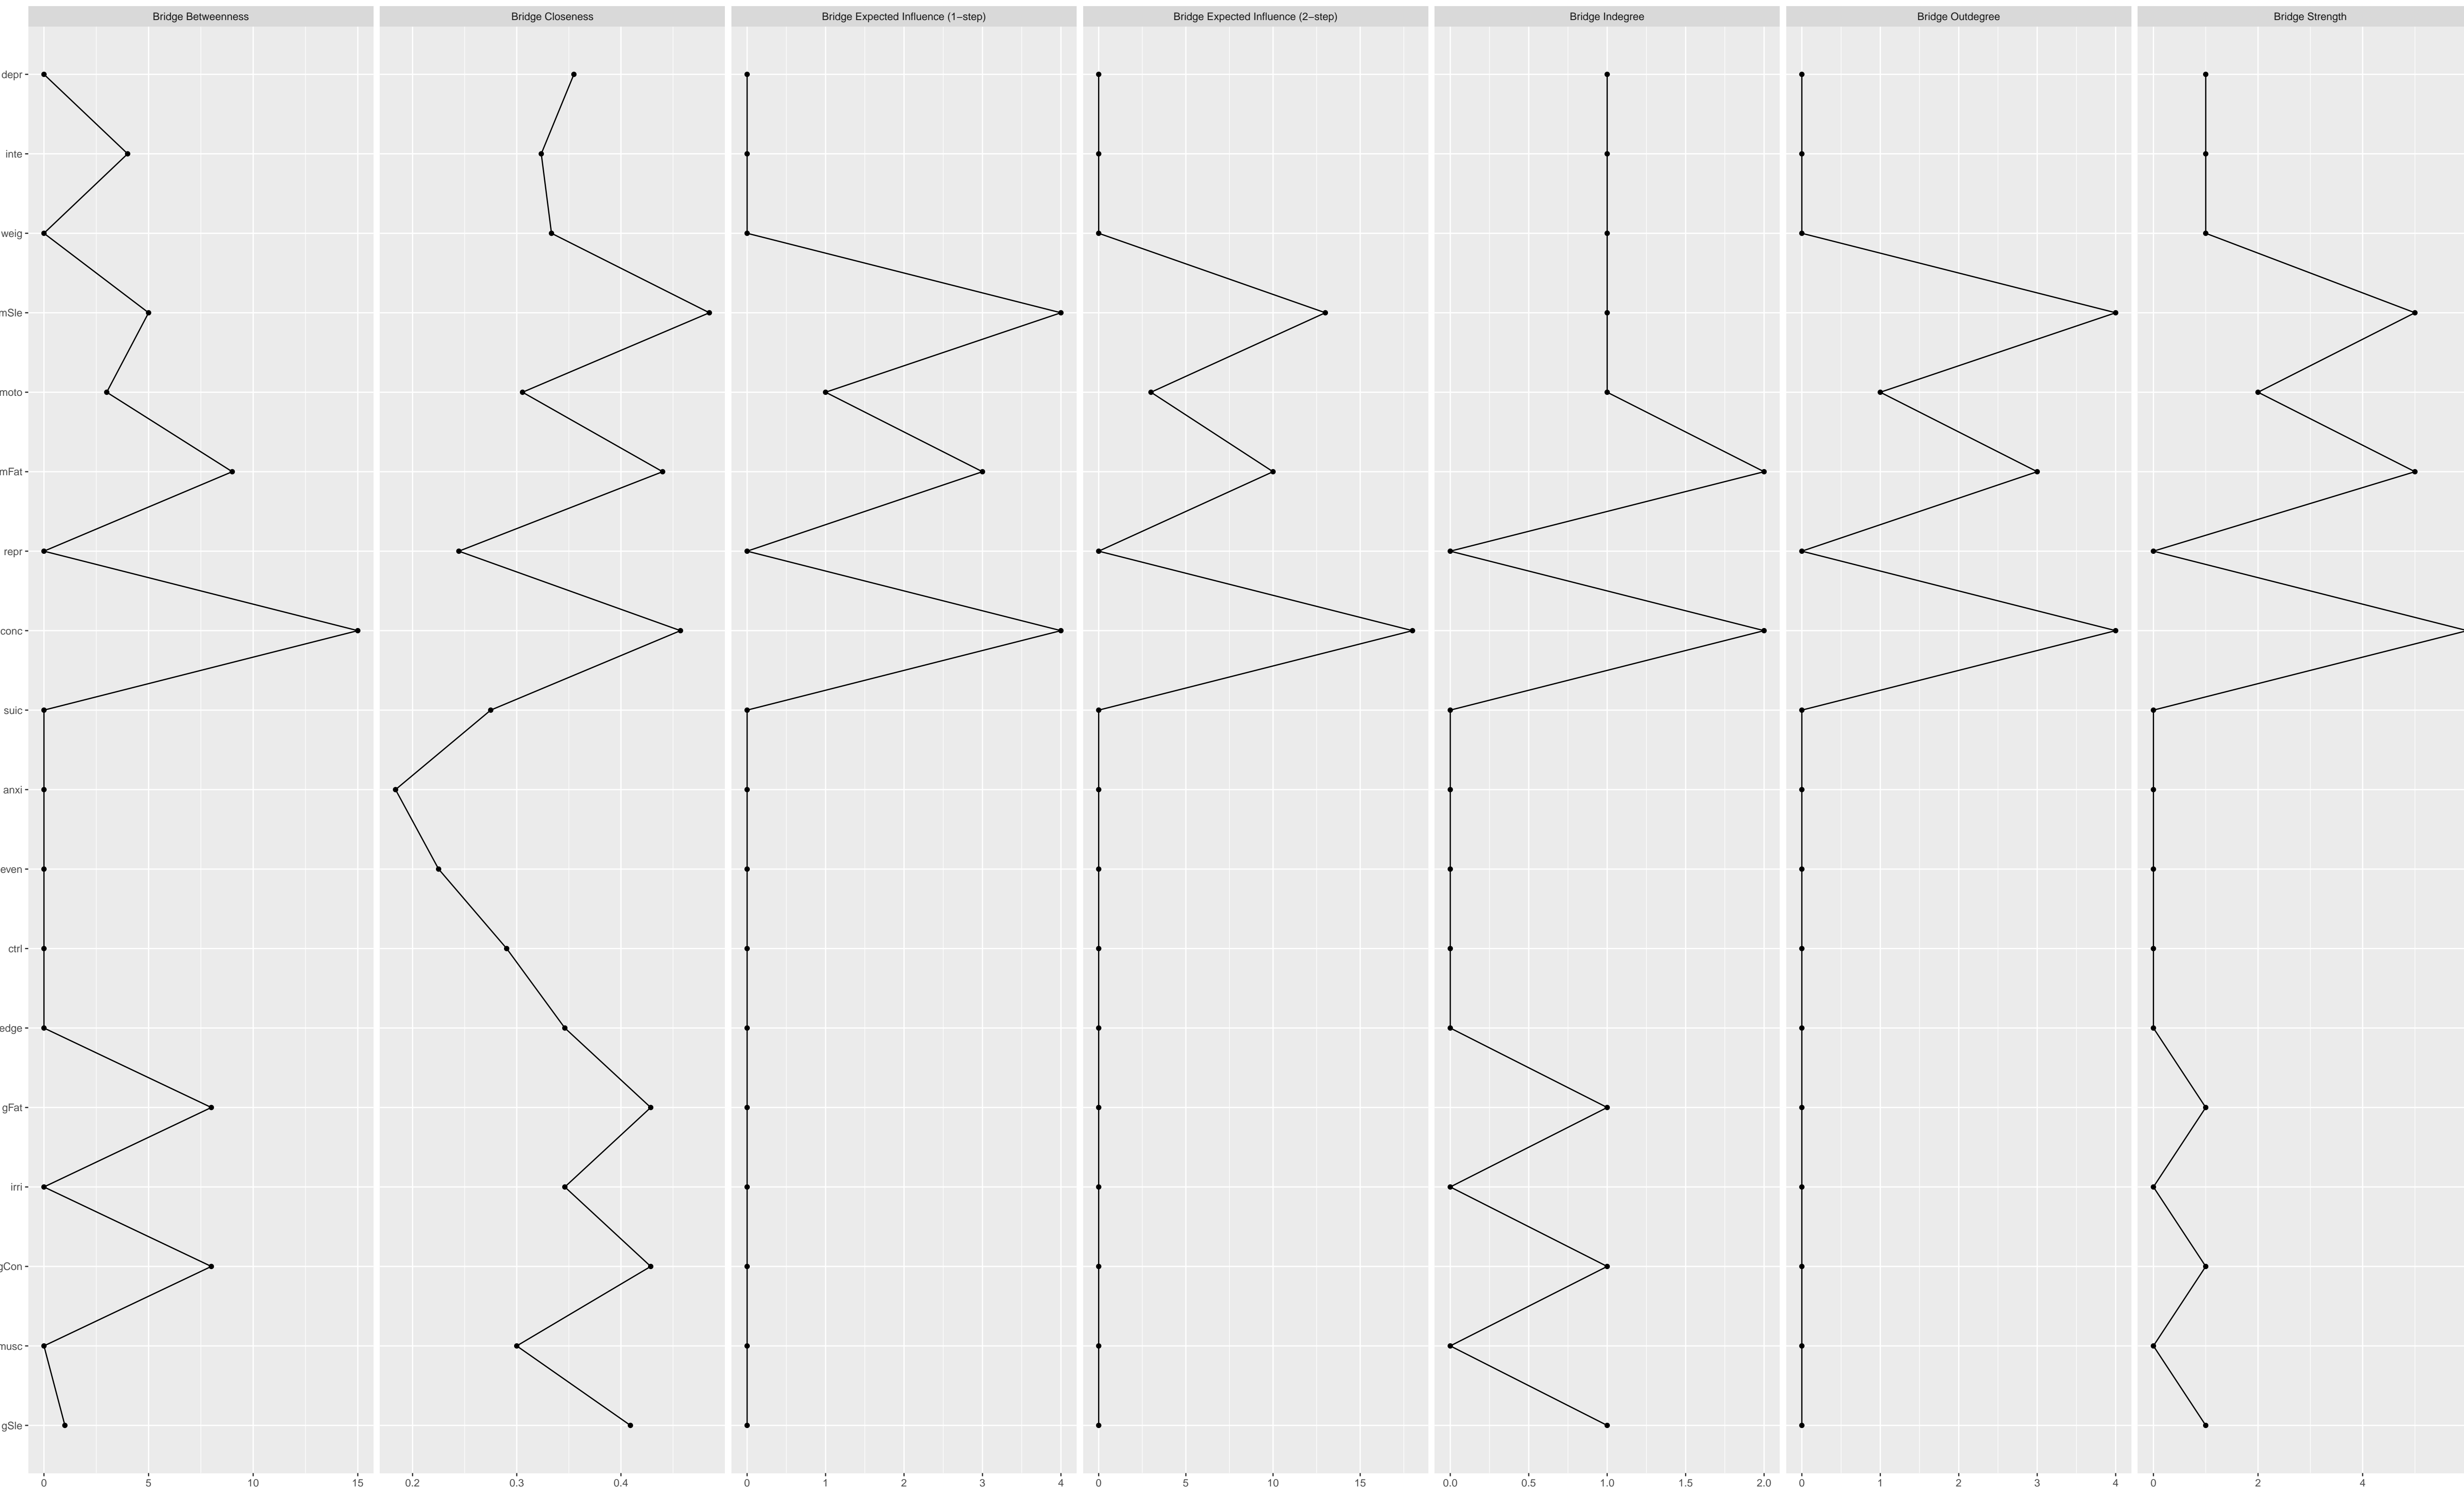

Supplement: Supplementary file 14 [file 2]

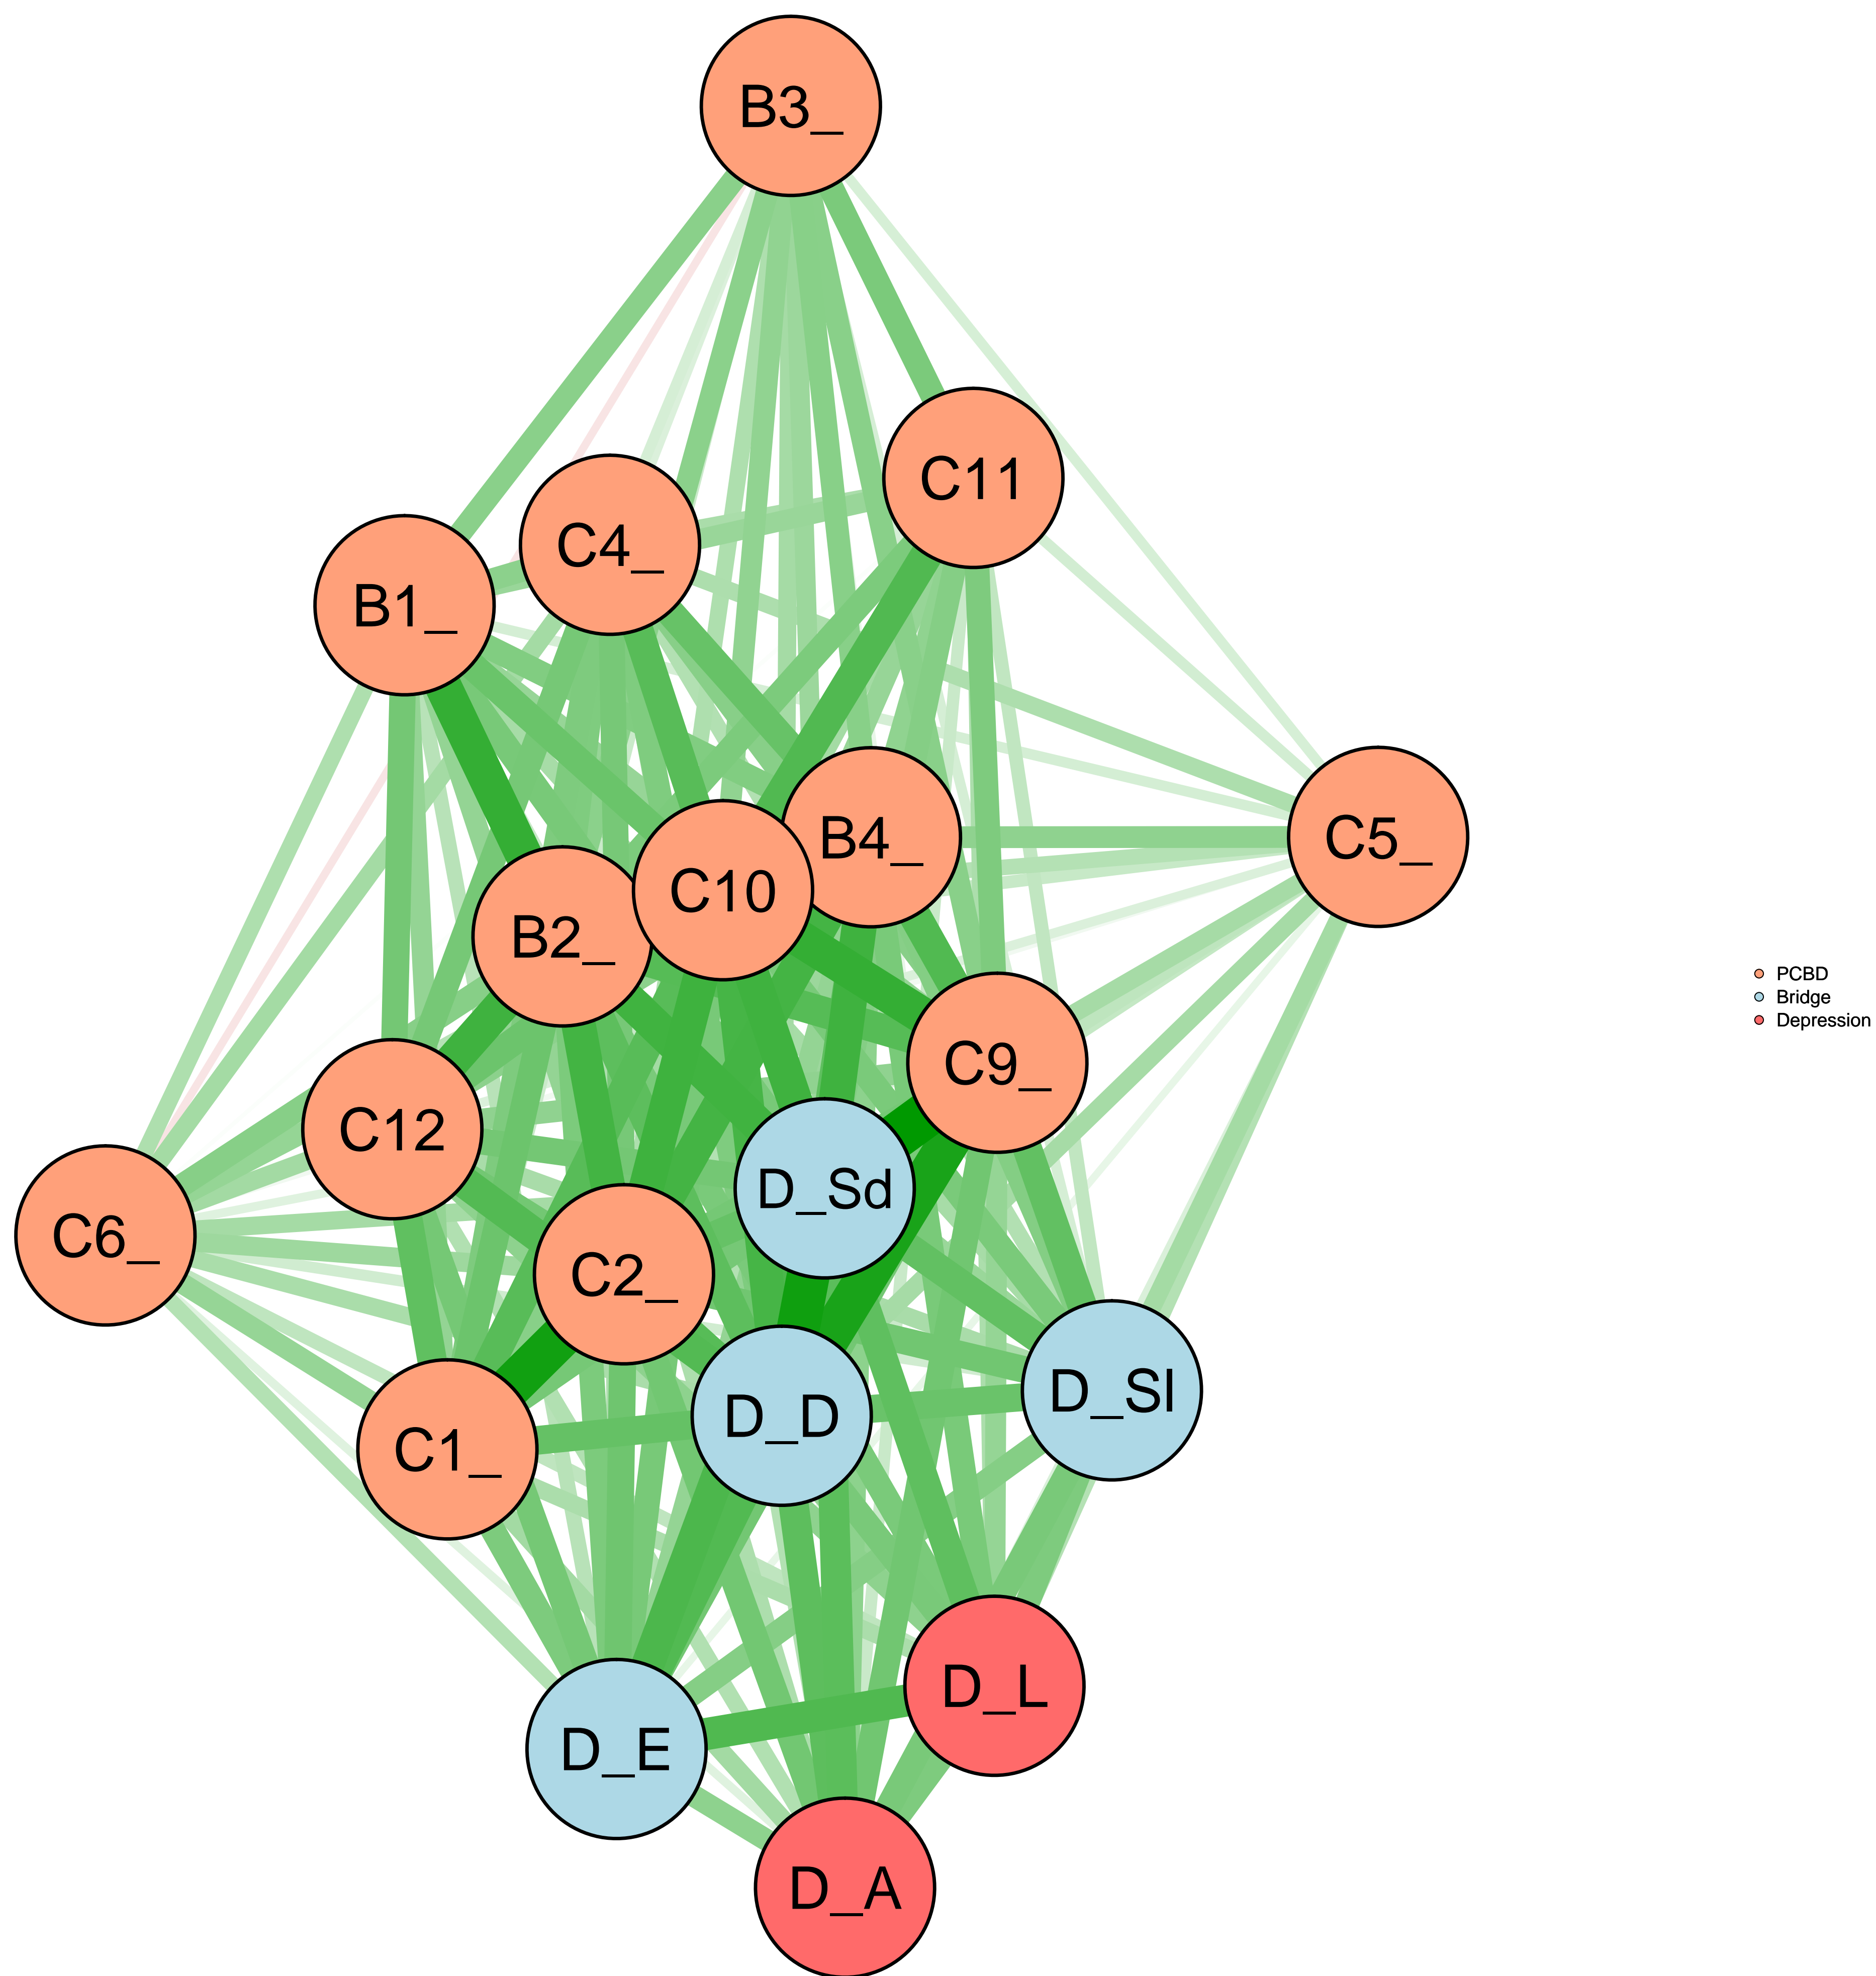

Supplement: Supplementary file 15 [file 2]

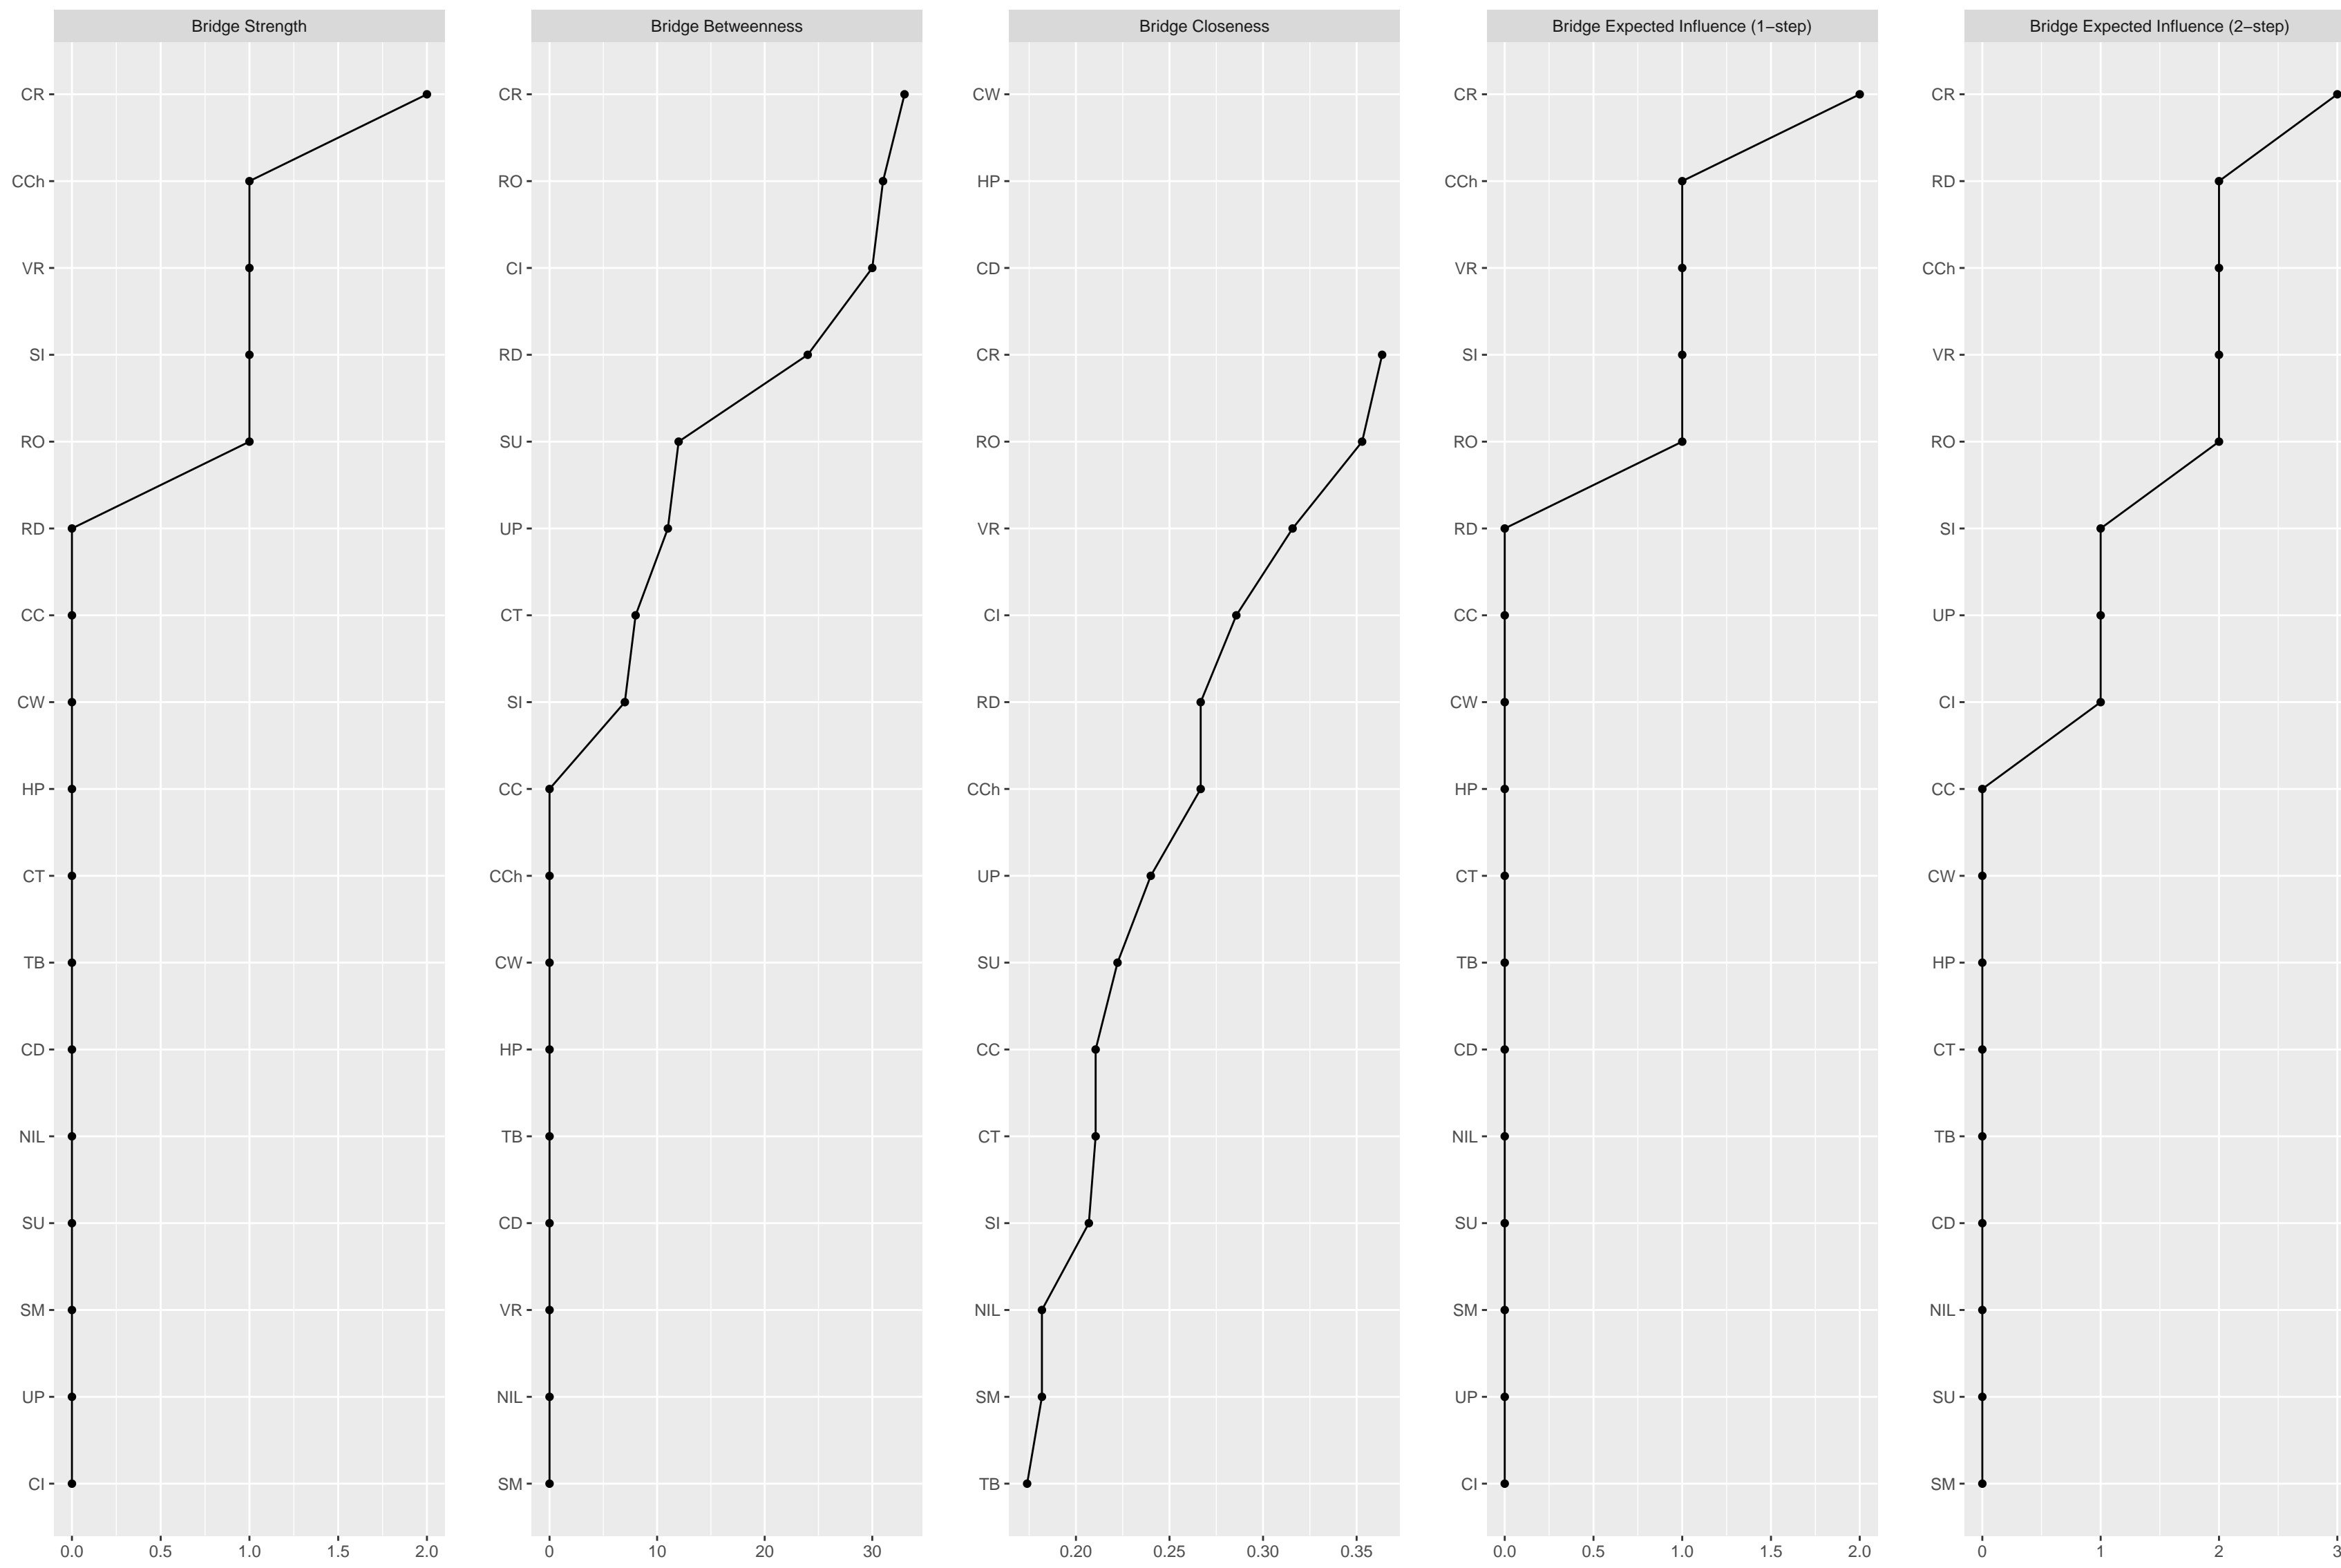

Supplement: Supplementary file 16 [file 2]

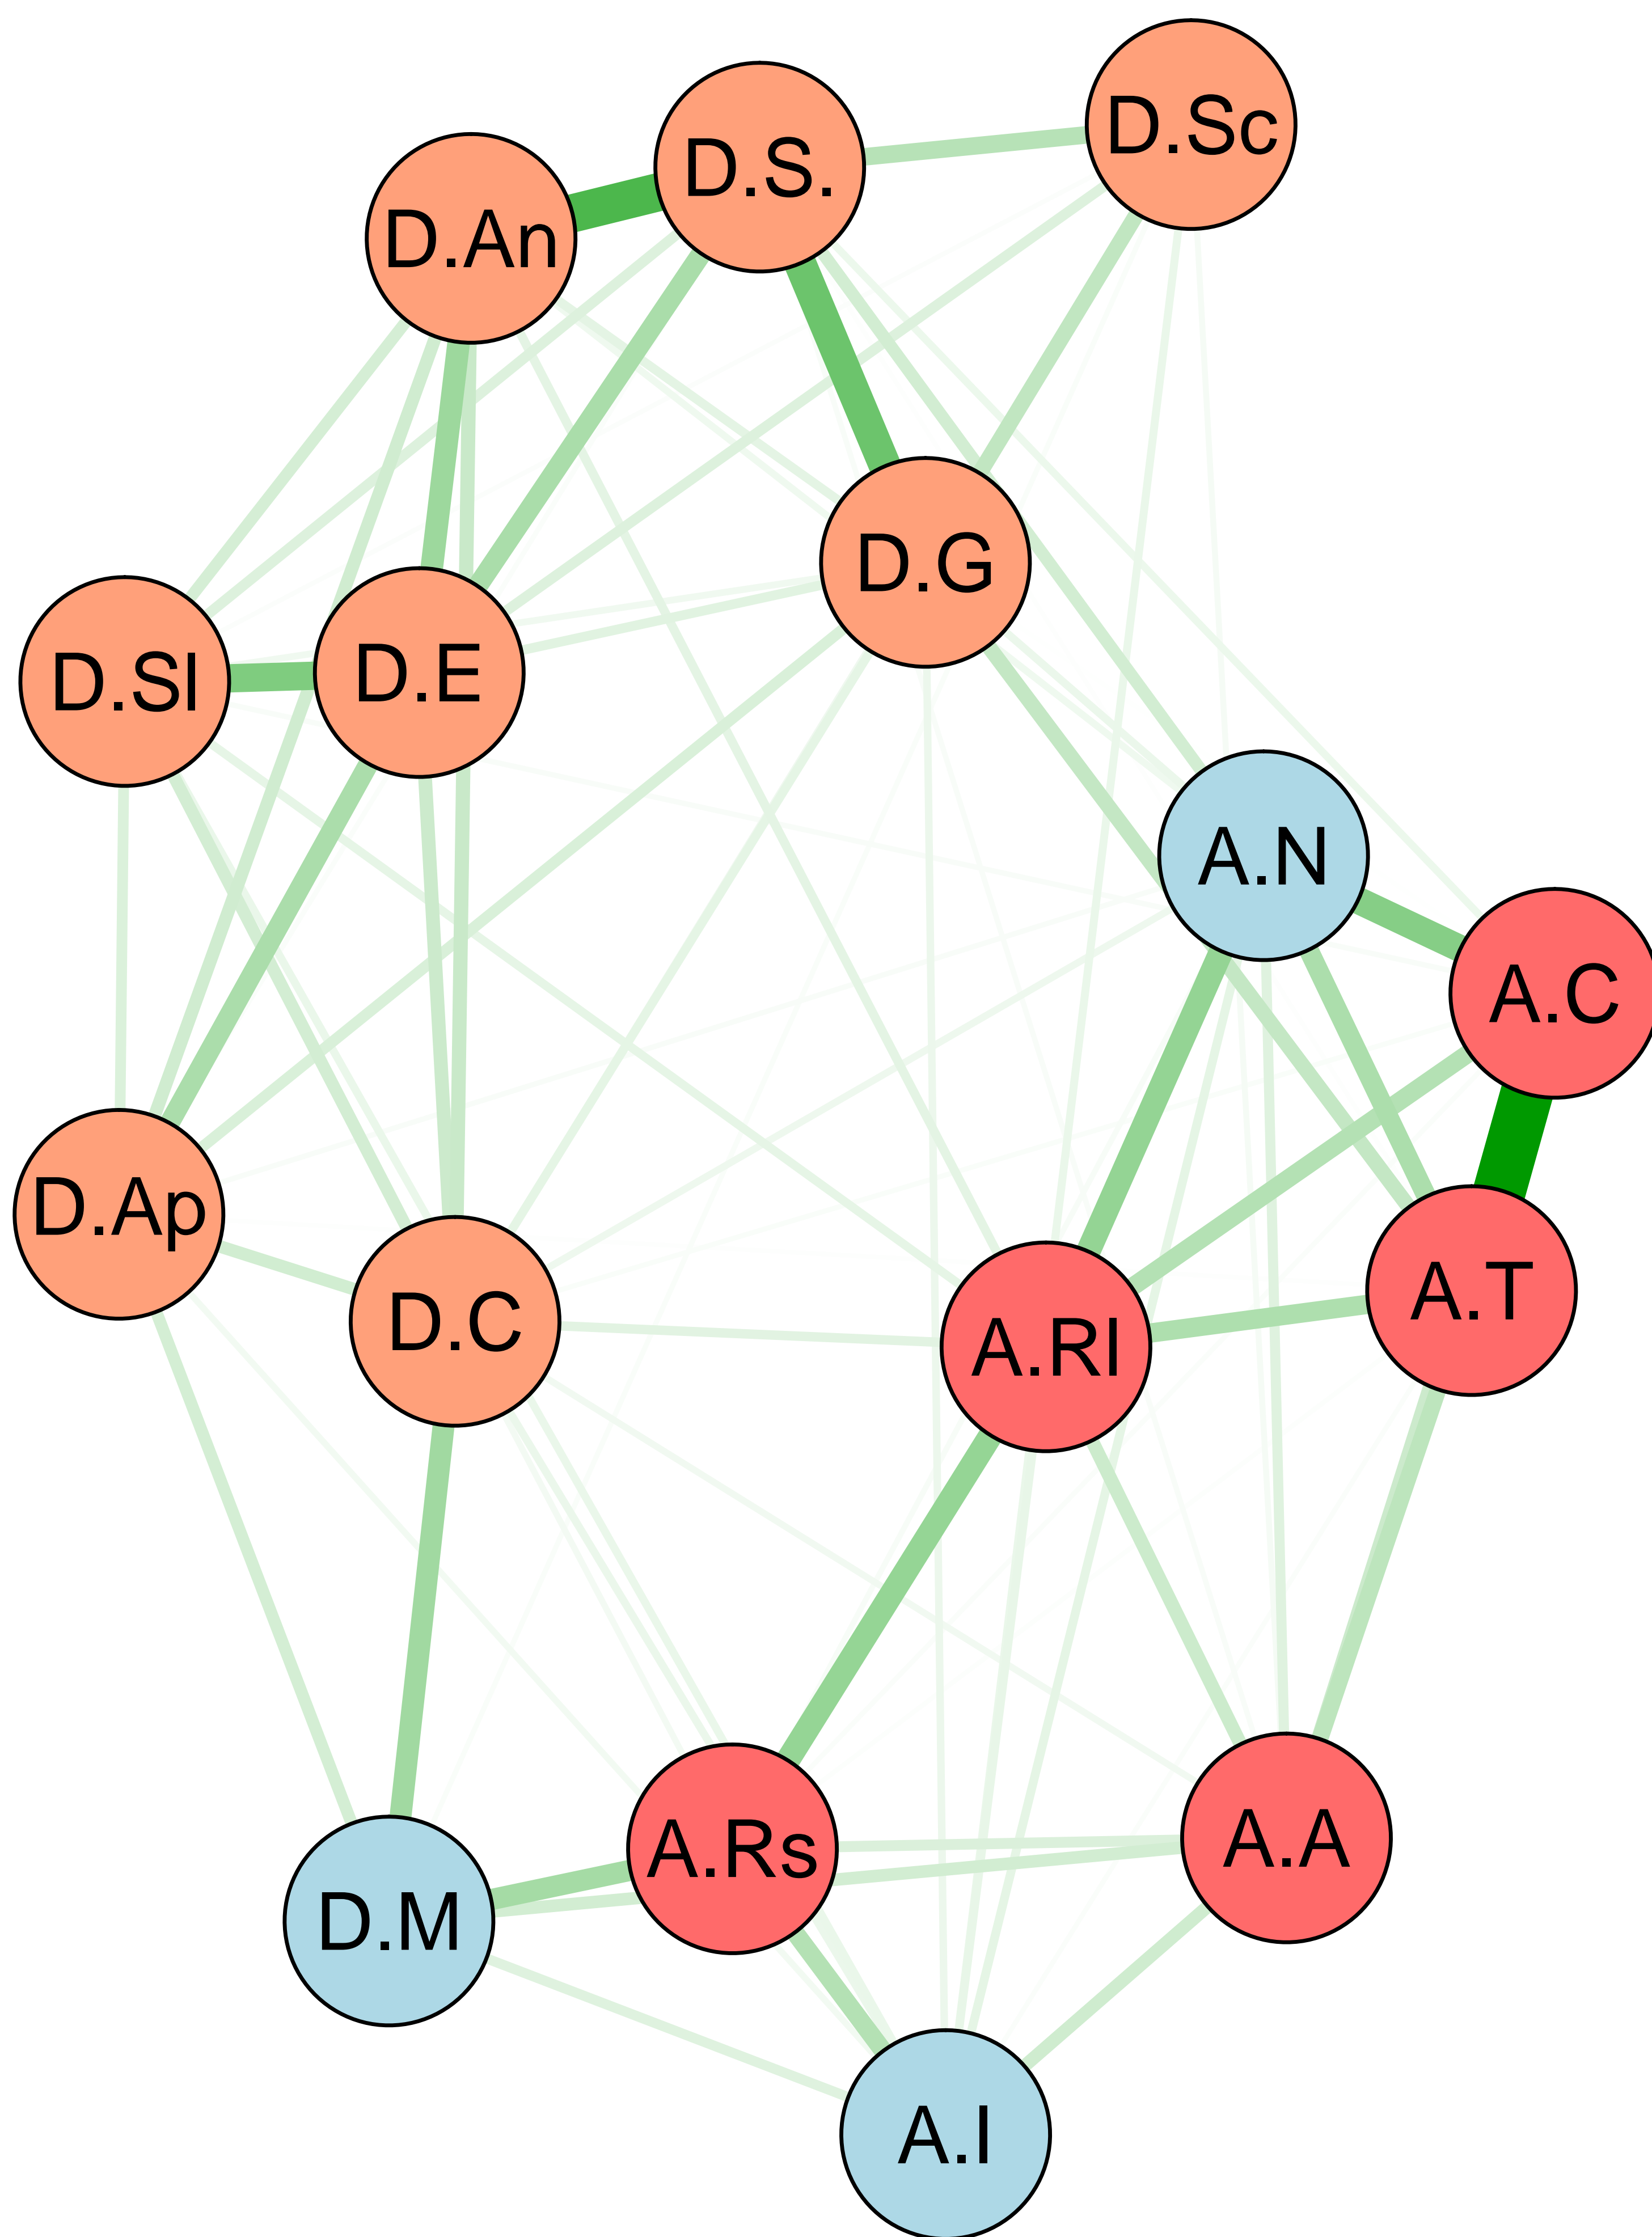

Supplement: Supplementary file 17 [file 2]

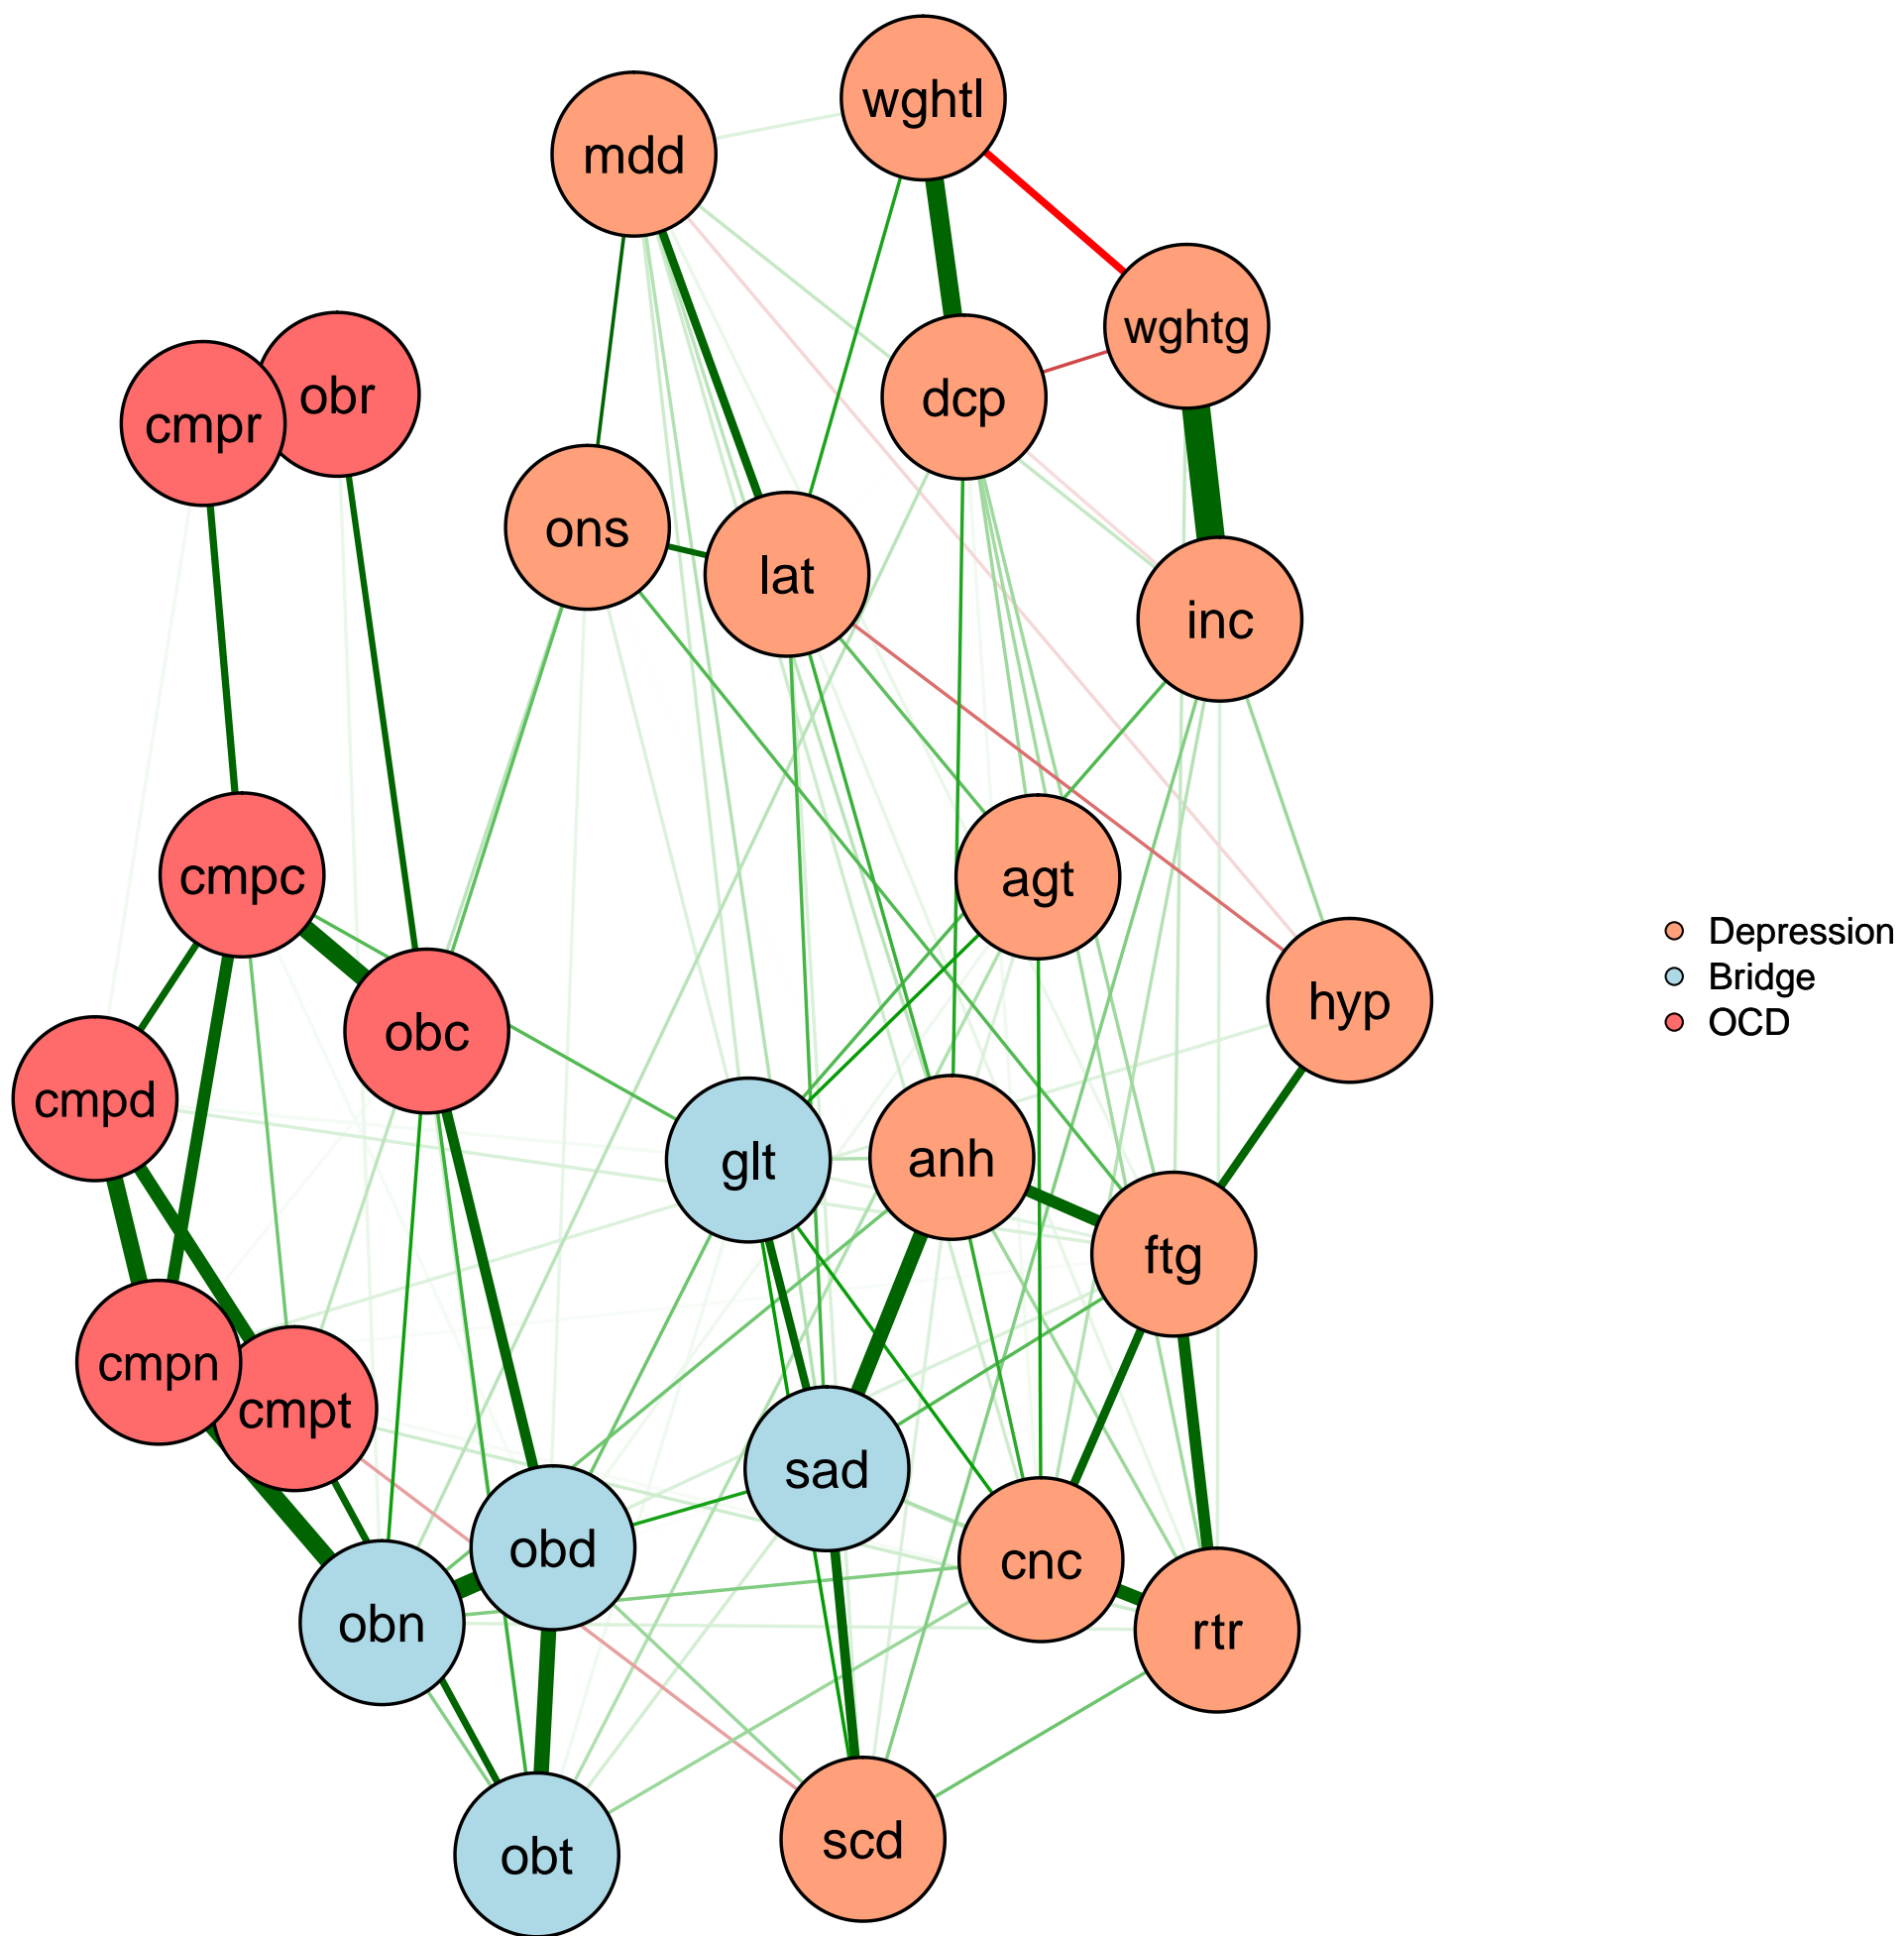

Supplement: Supplementary file 18 [file 2]

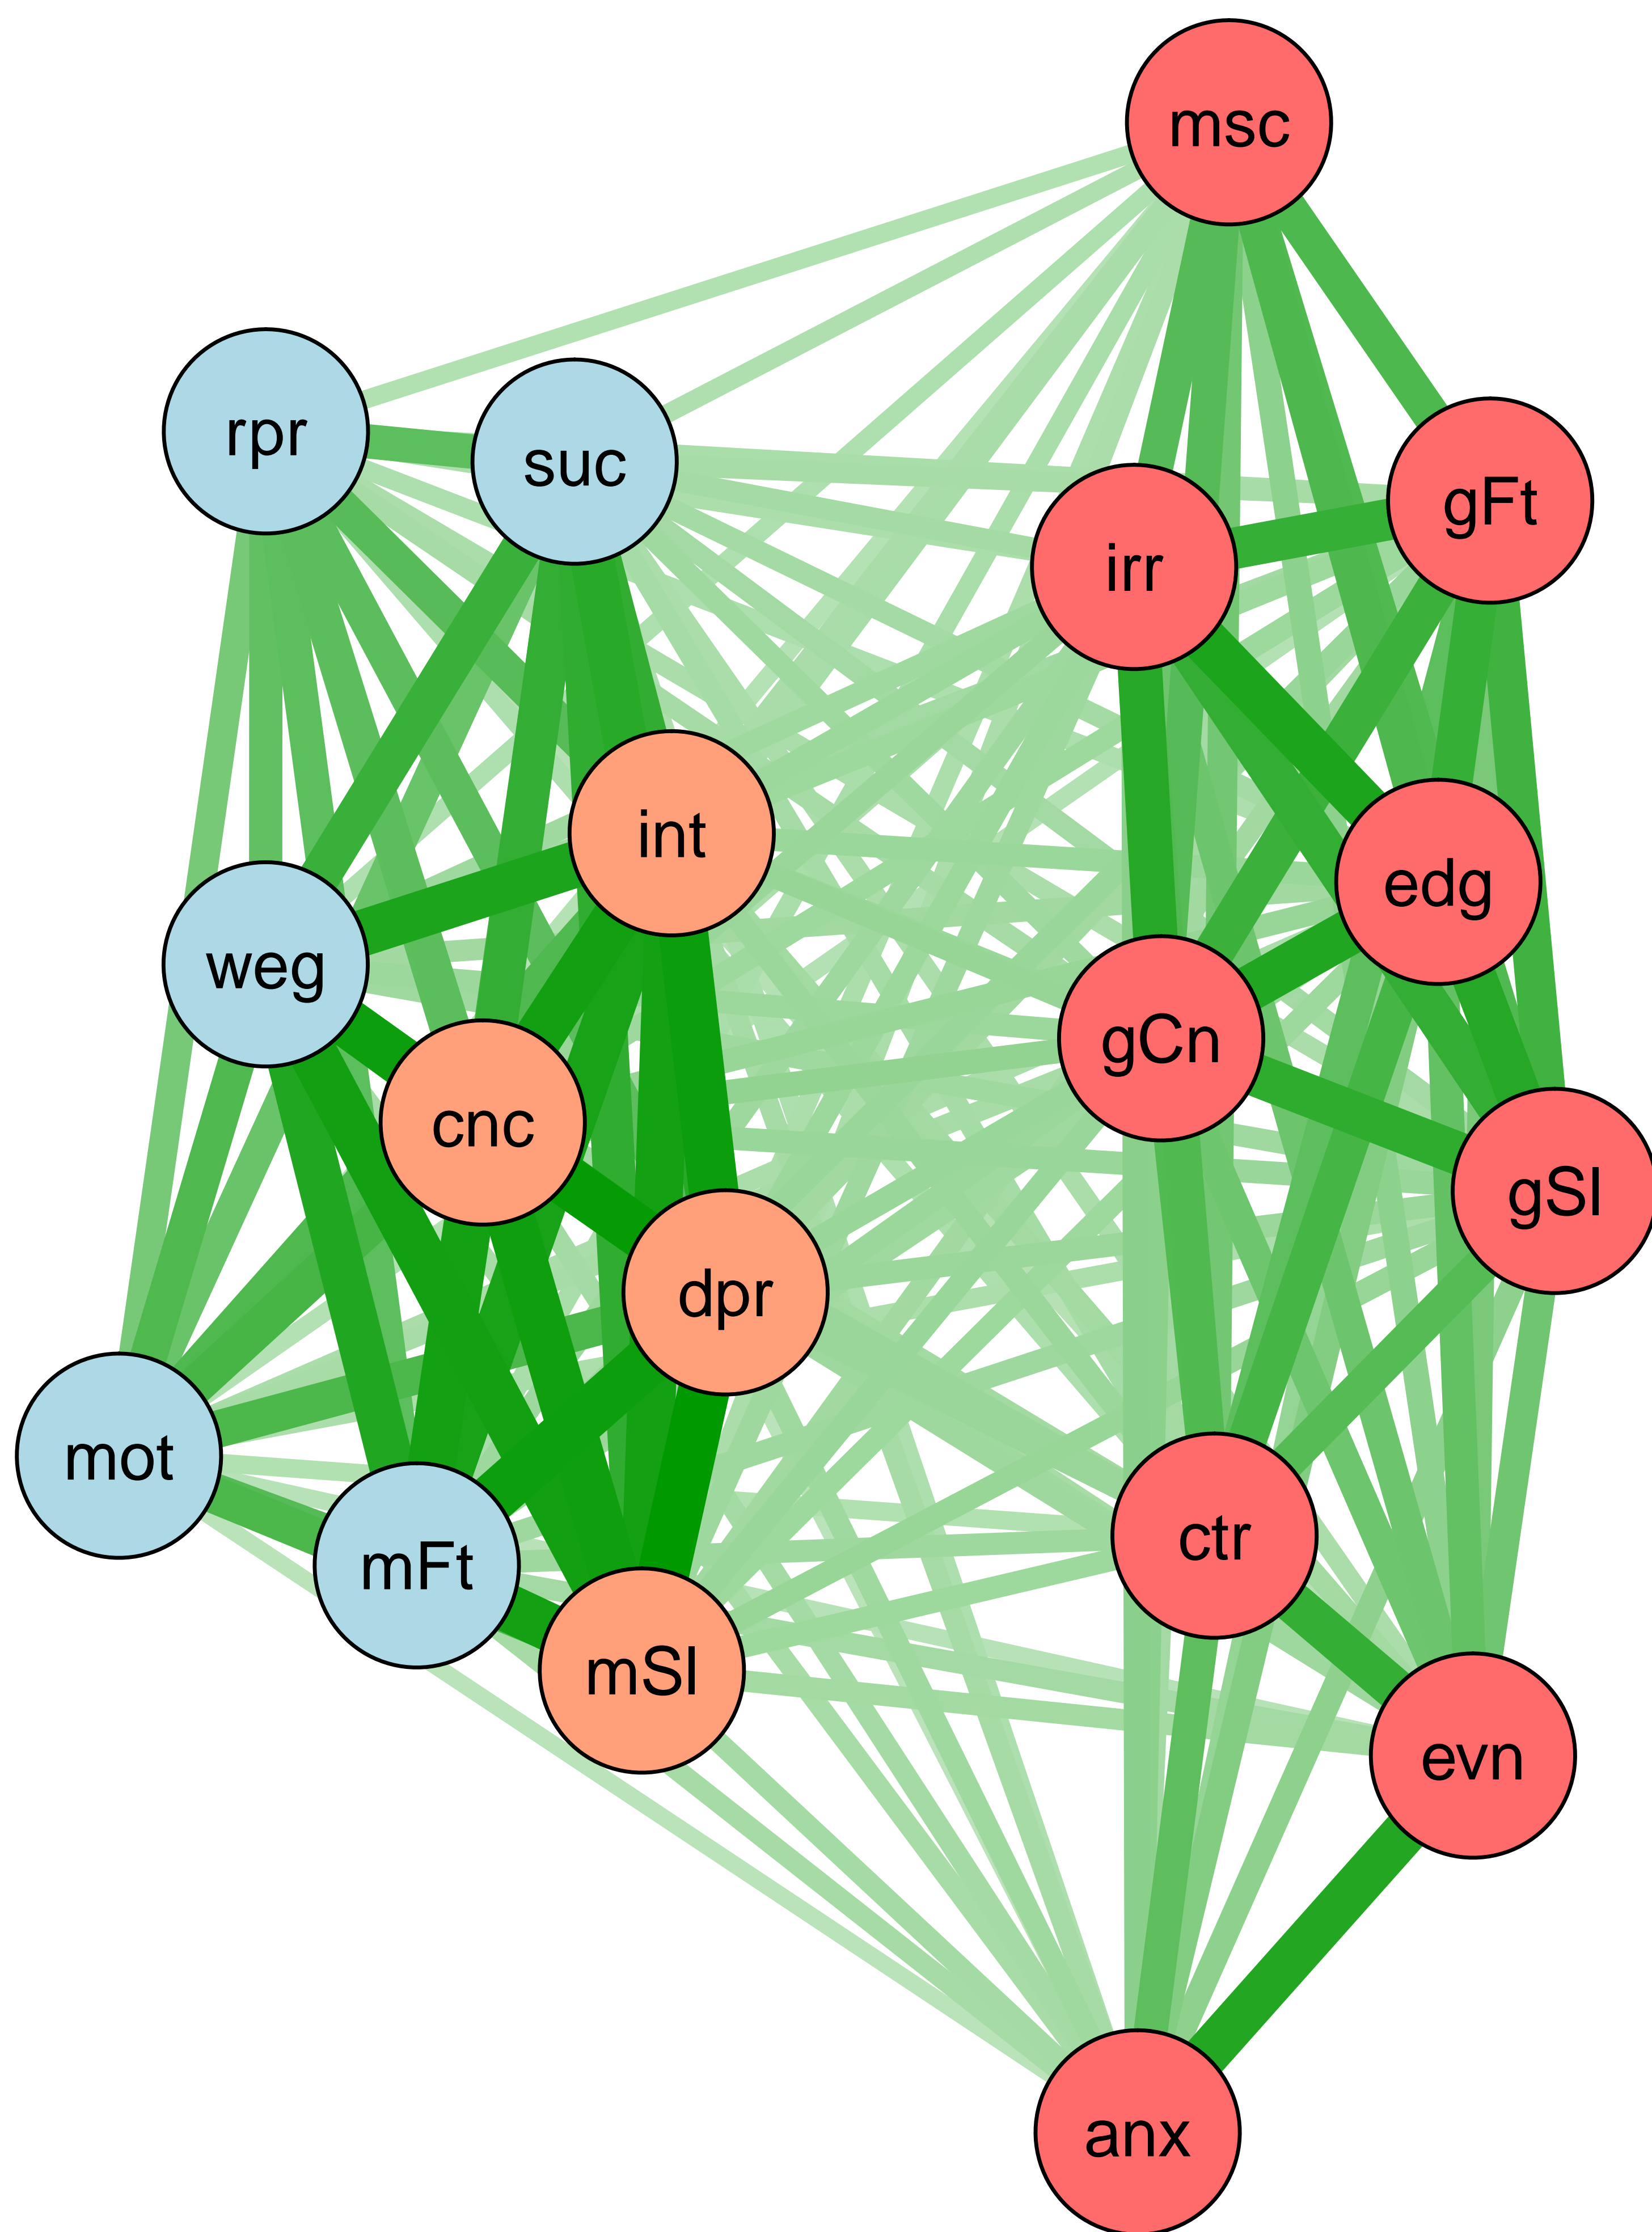

Supplement: Supplementary file 19 [file 2]

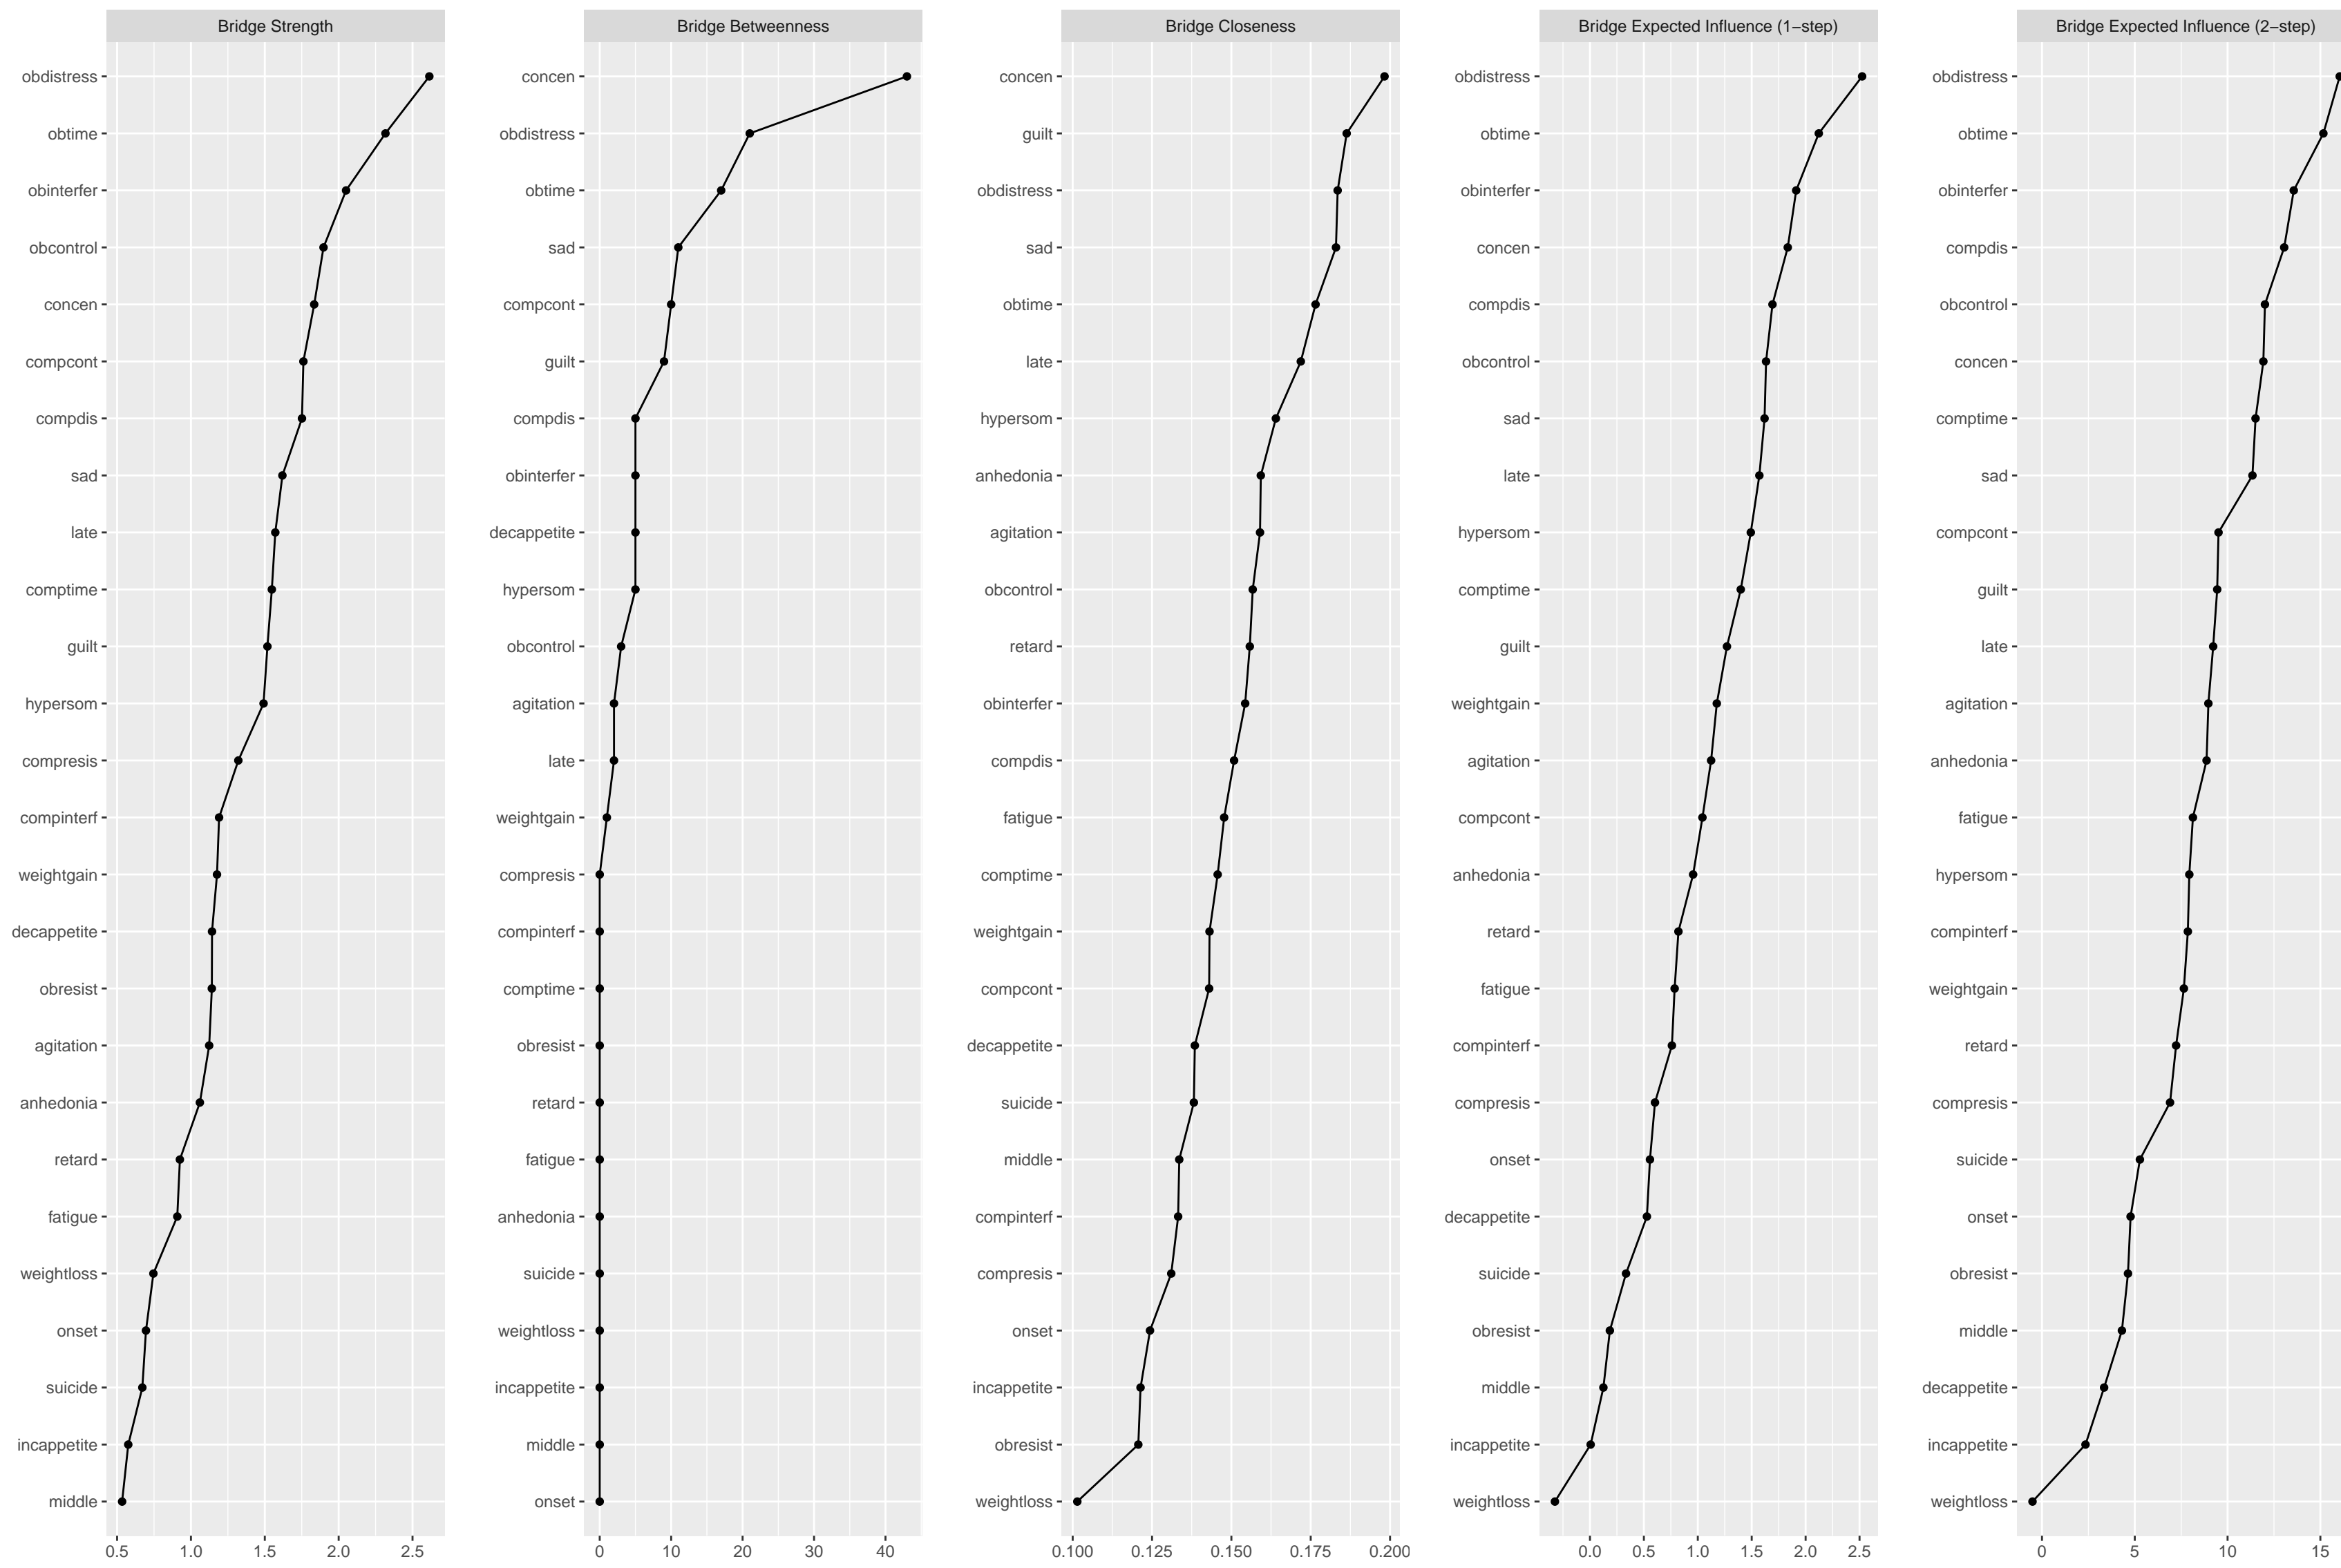

Supplement: Supplementary file 20 [file 2]

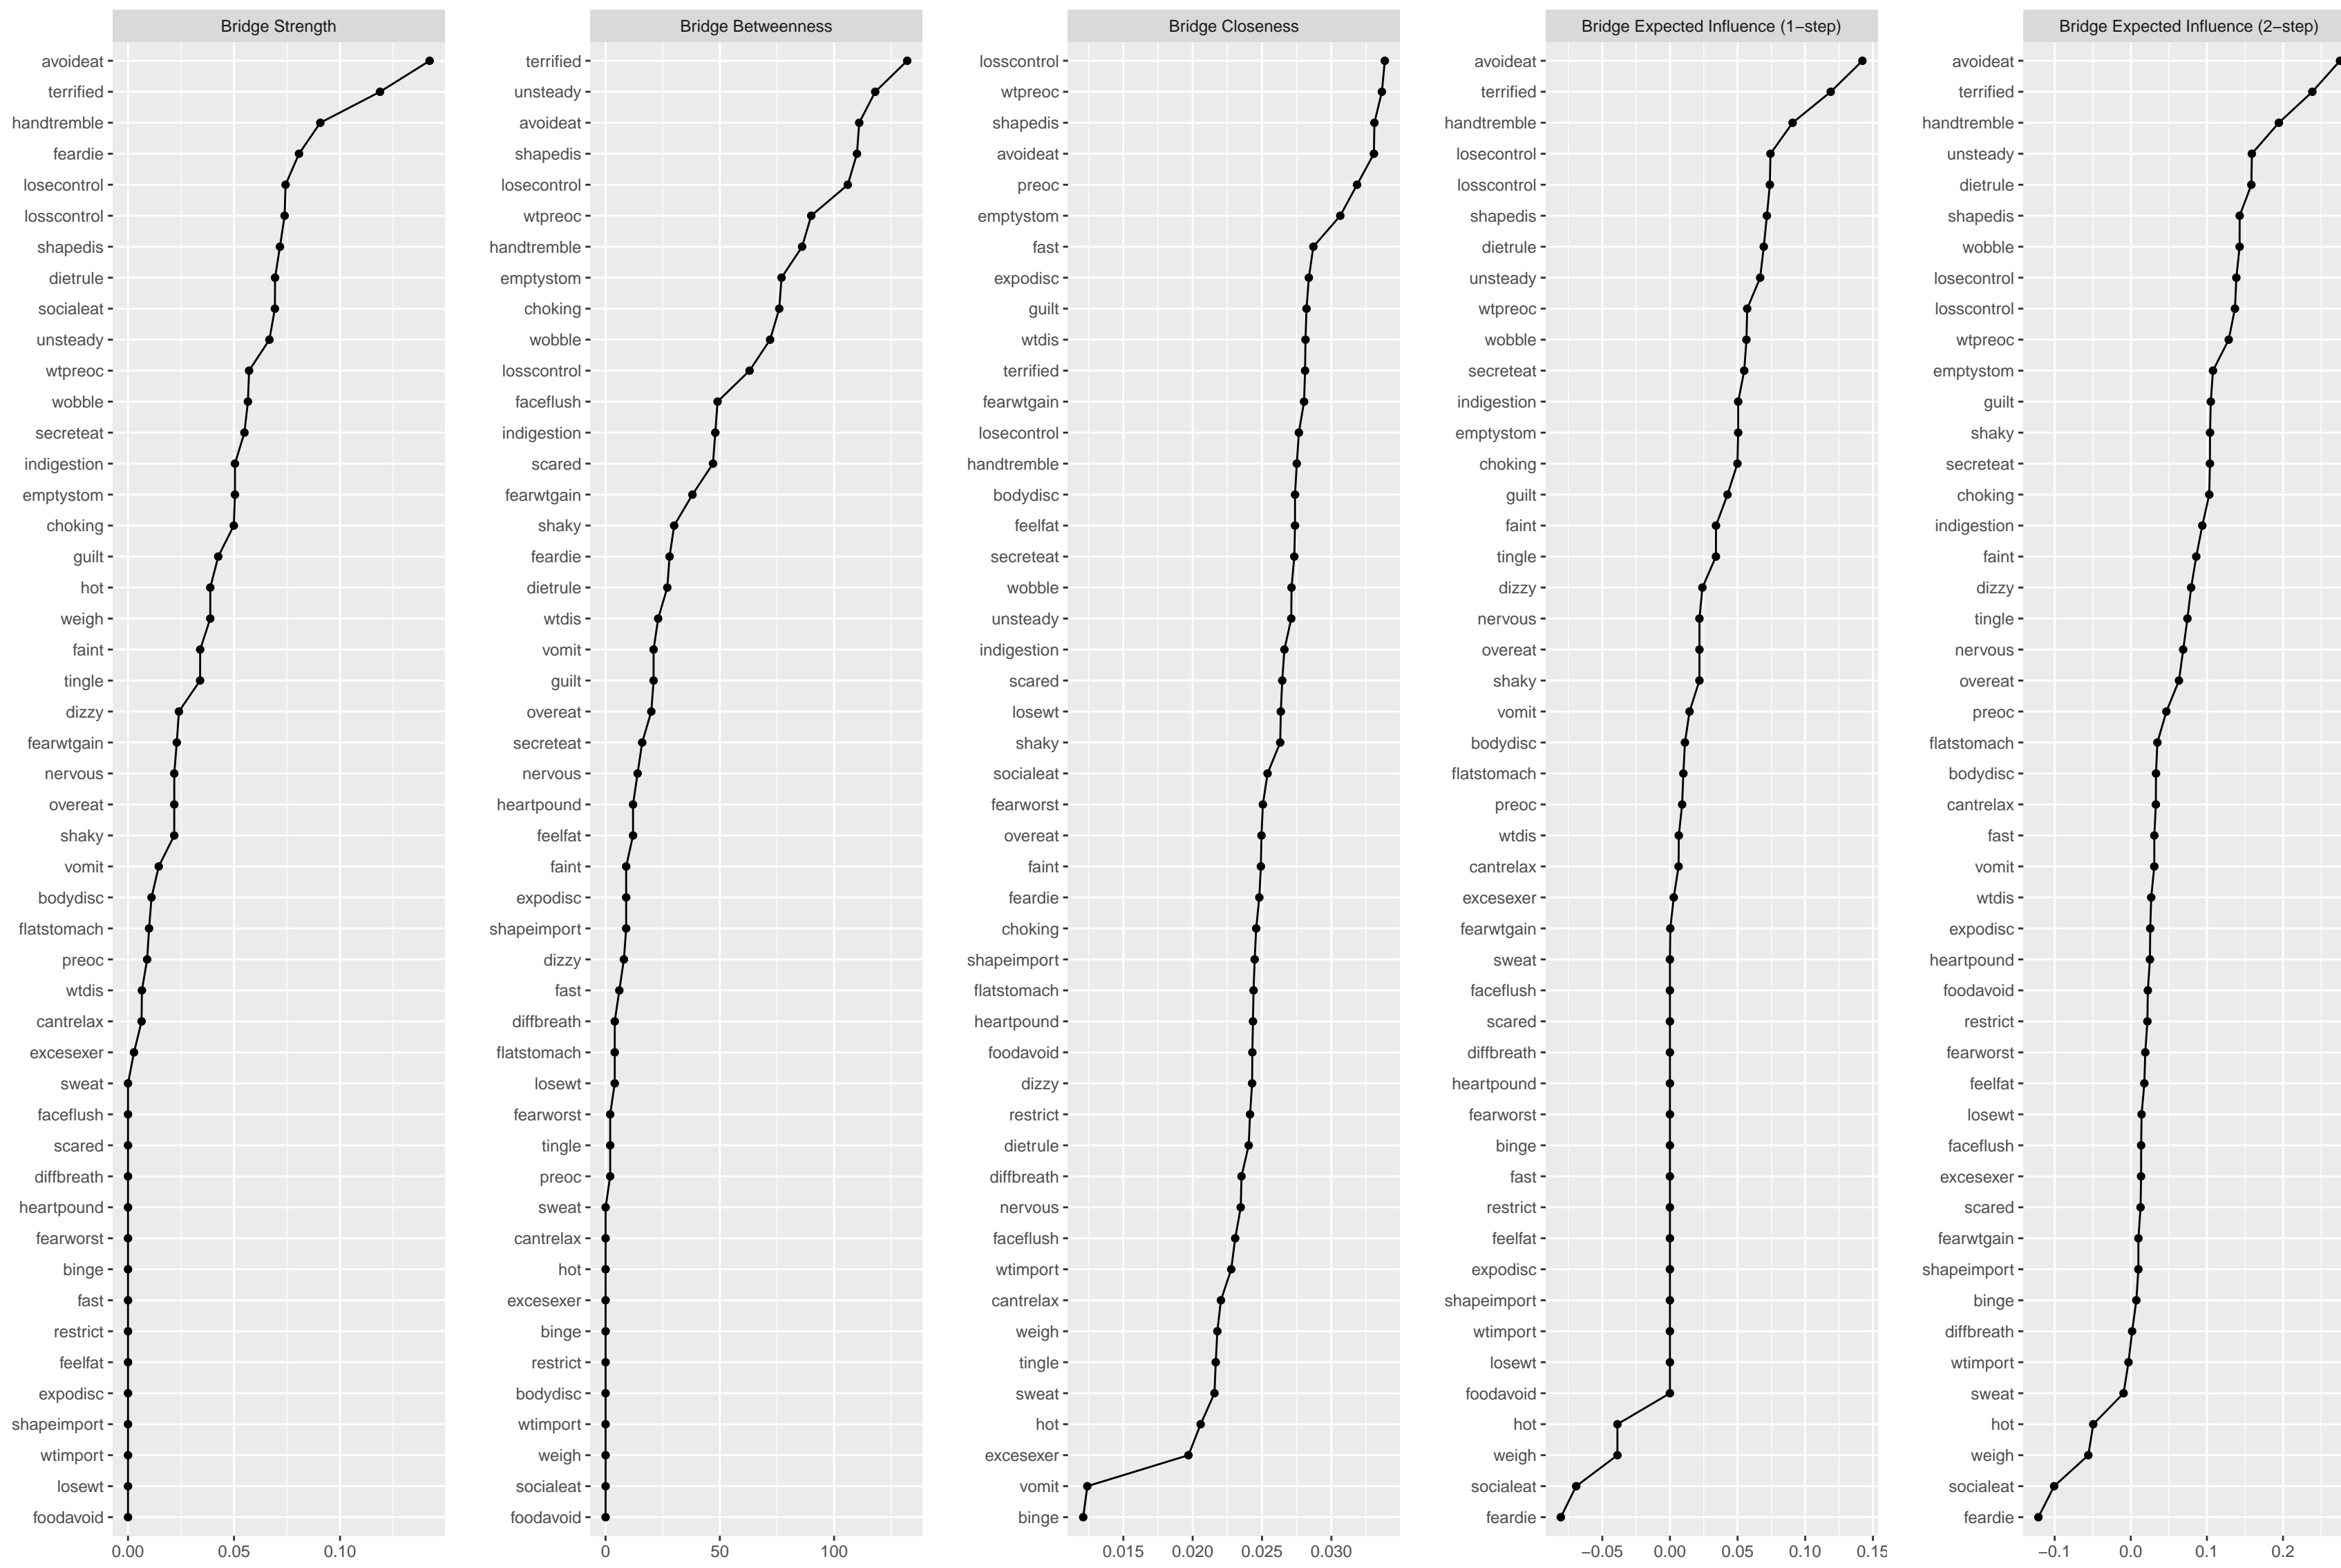

Supplement: Supplementary file 21 [file 2]

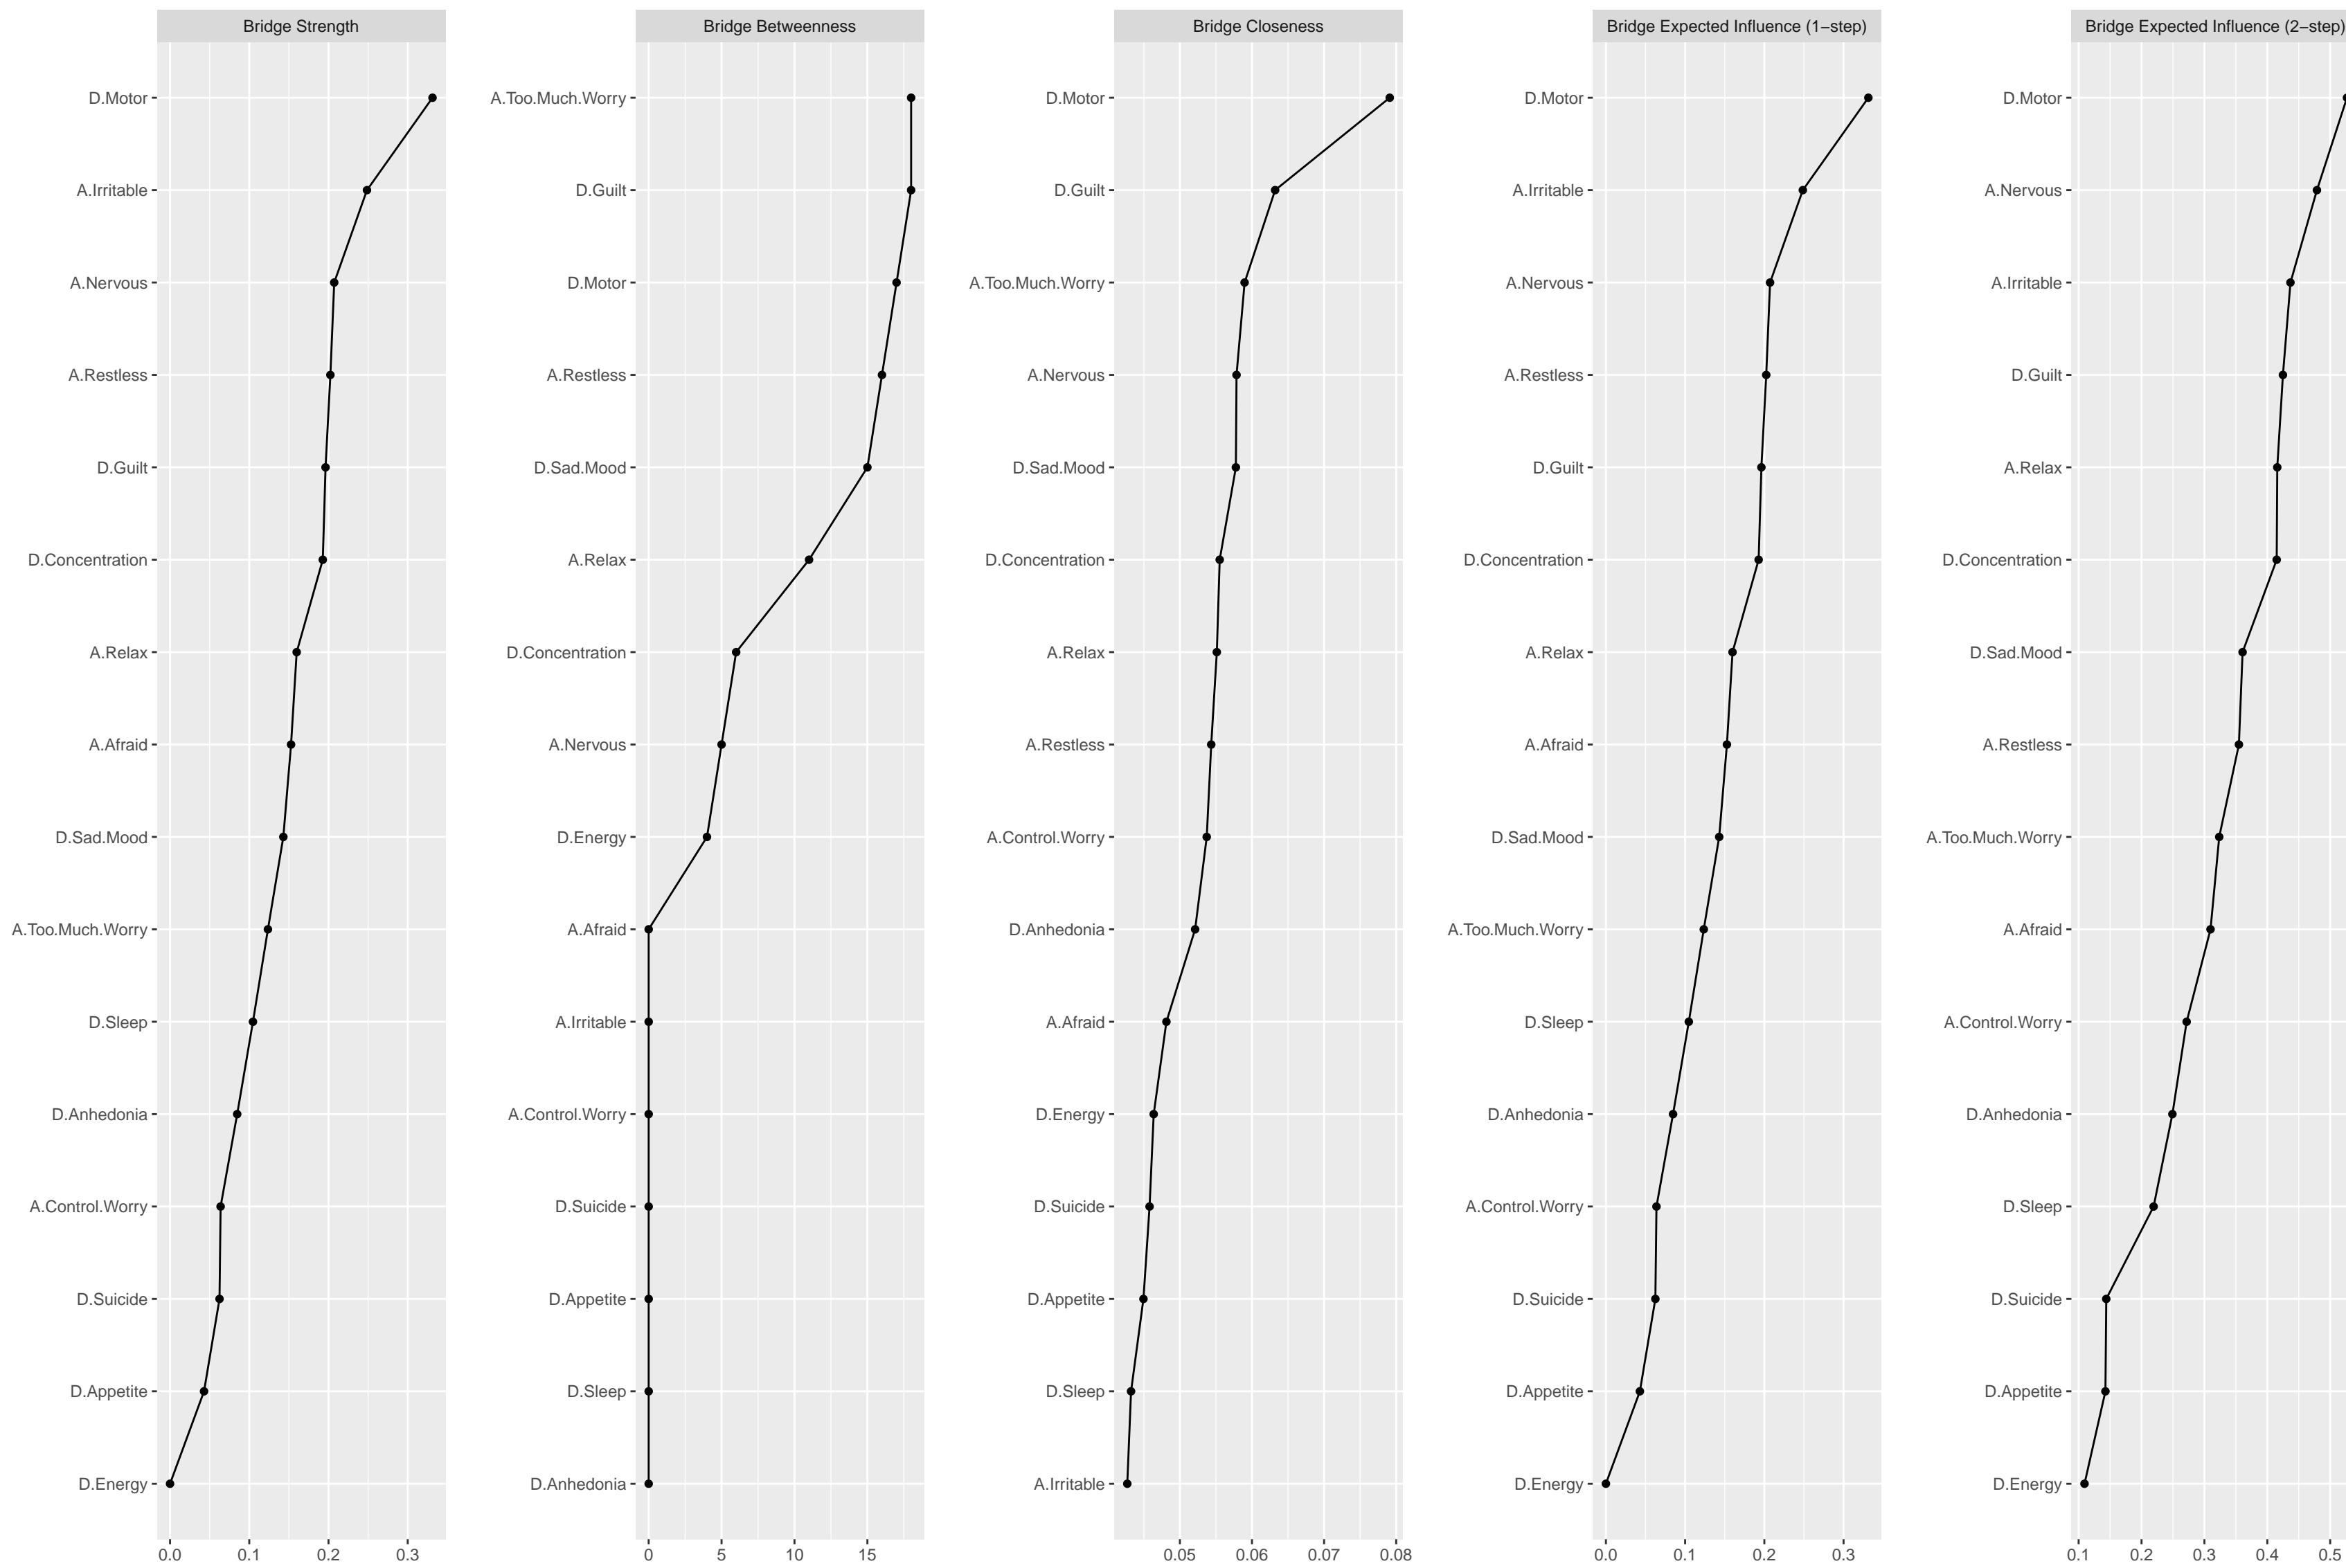

Supplement: Supplementary file 22 [file 2]

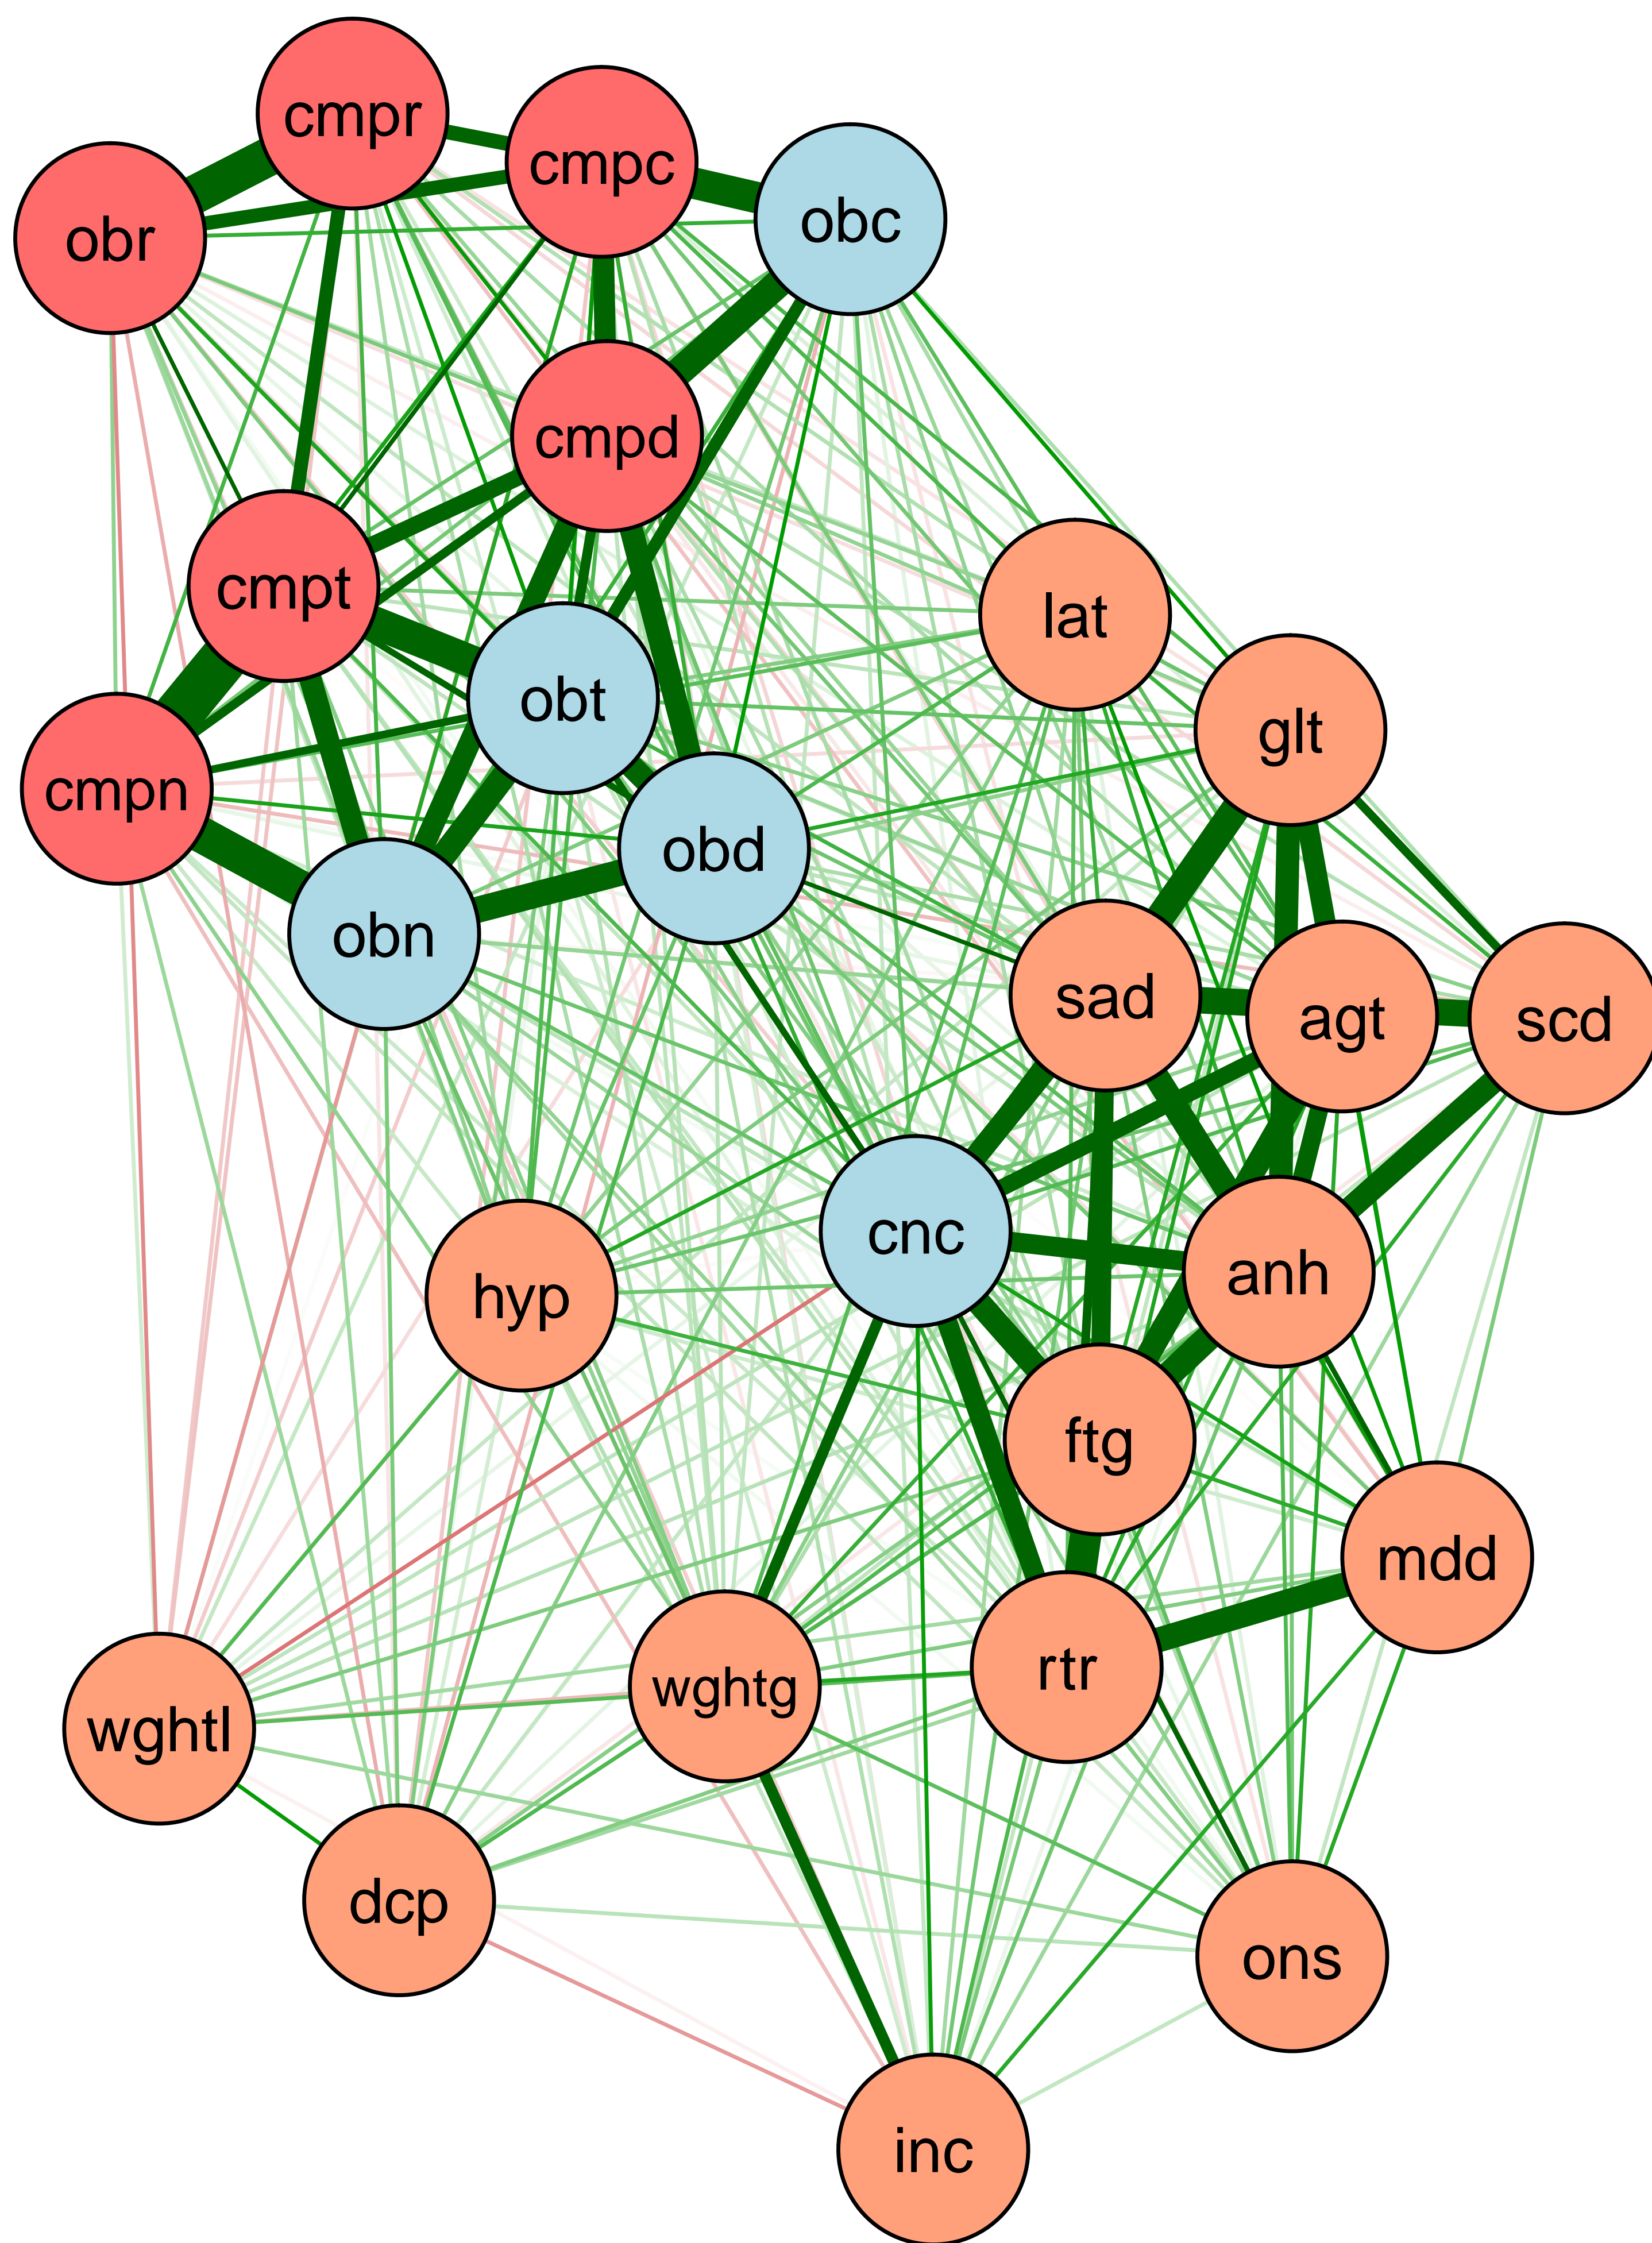

Supplement: Supplementary file 23 [file 2]

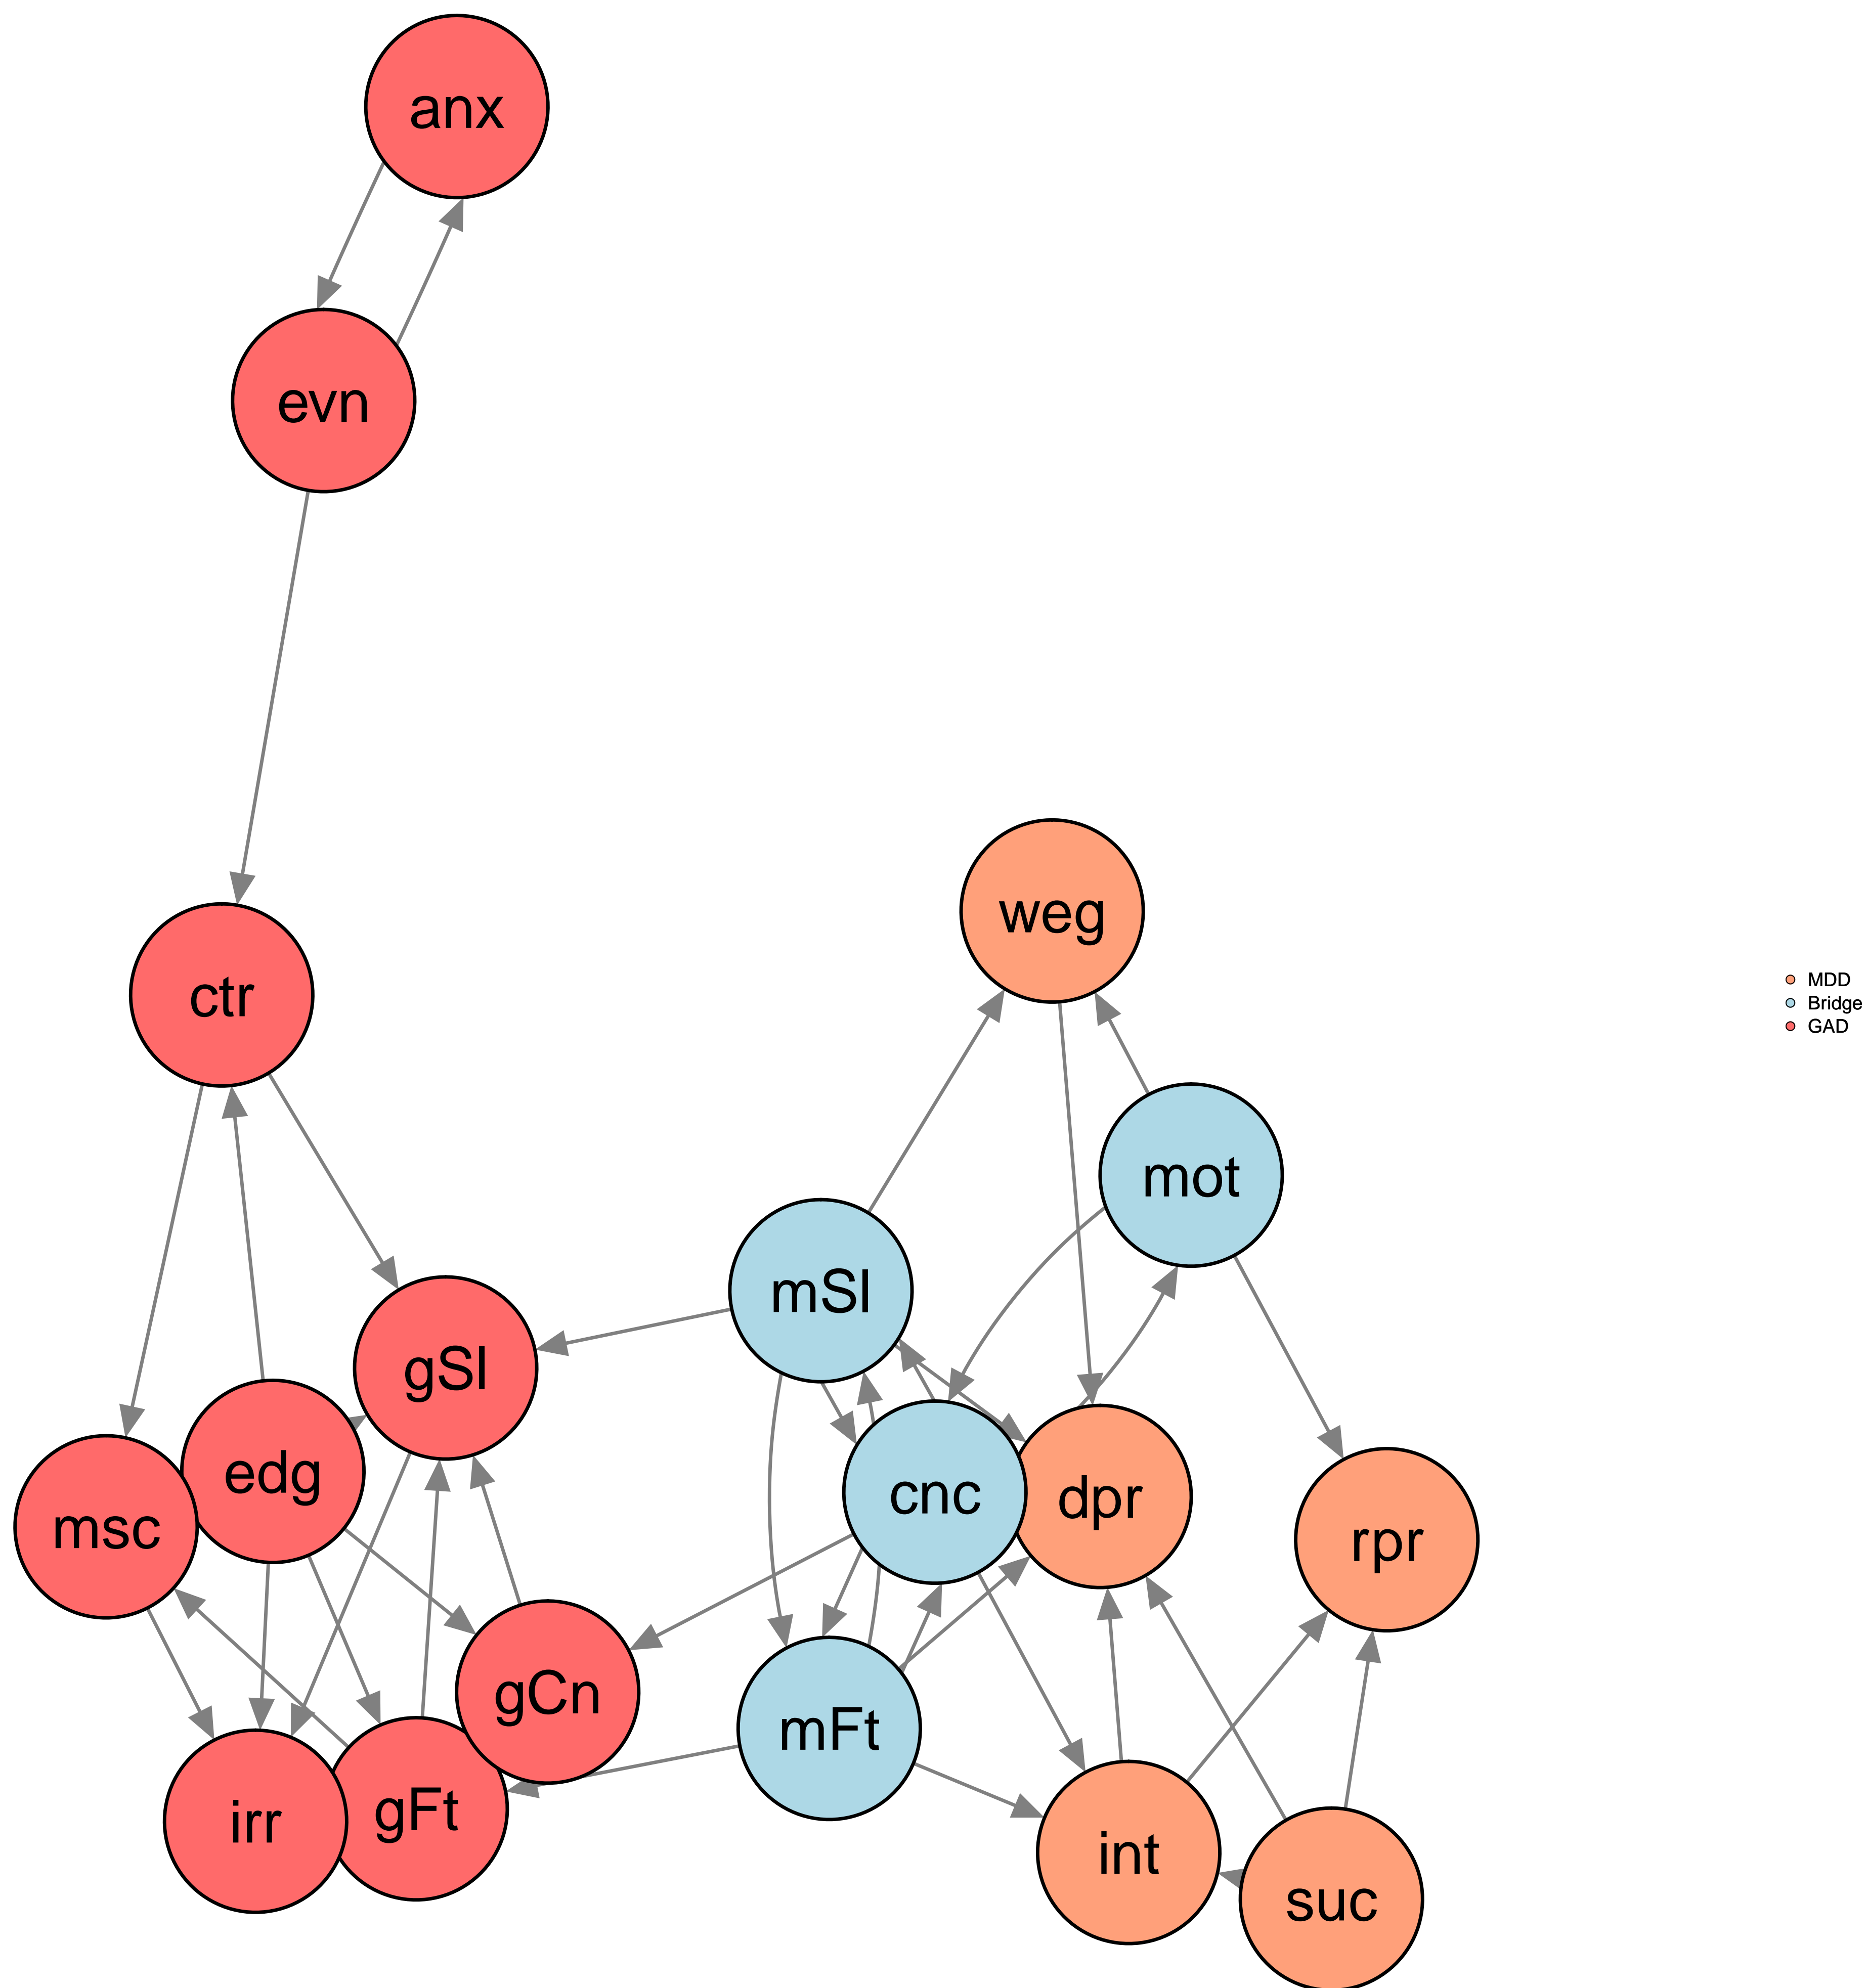

Supplement: Supplementary file 24 [file 2]

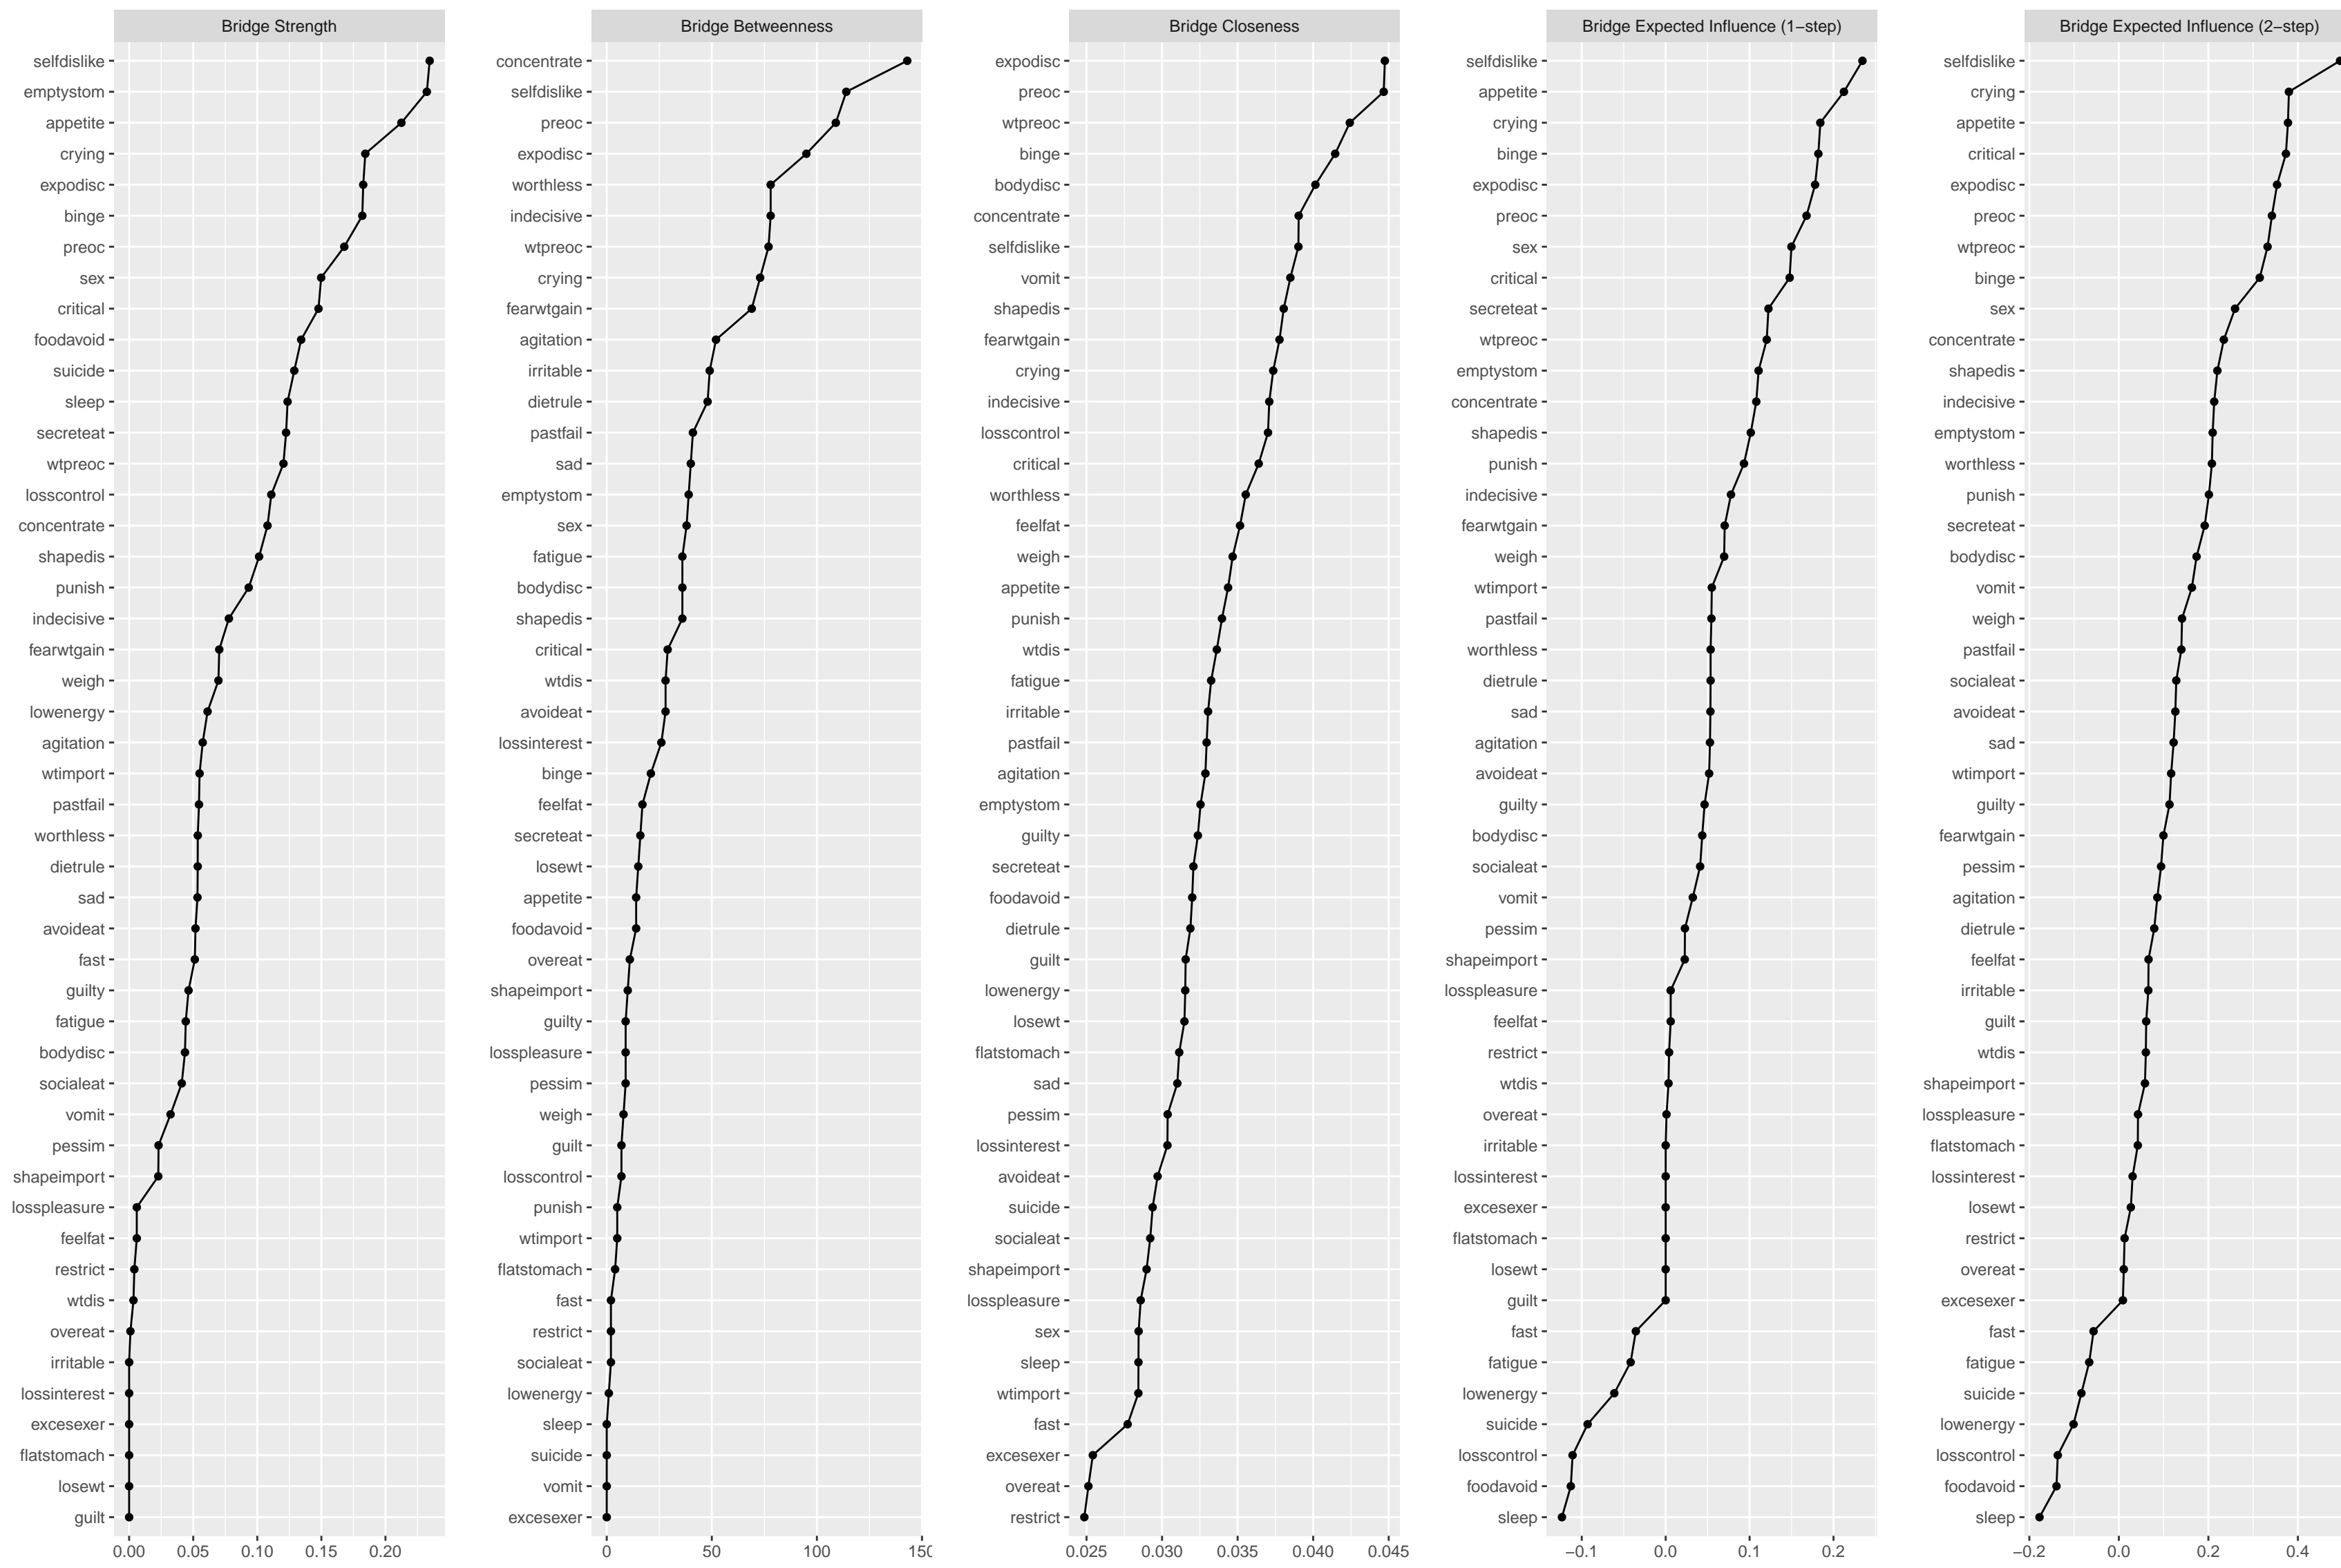

Supplement: Supplementary file 25 [file 2]

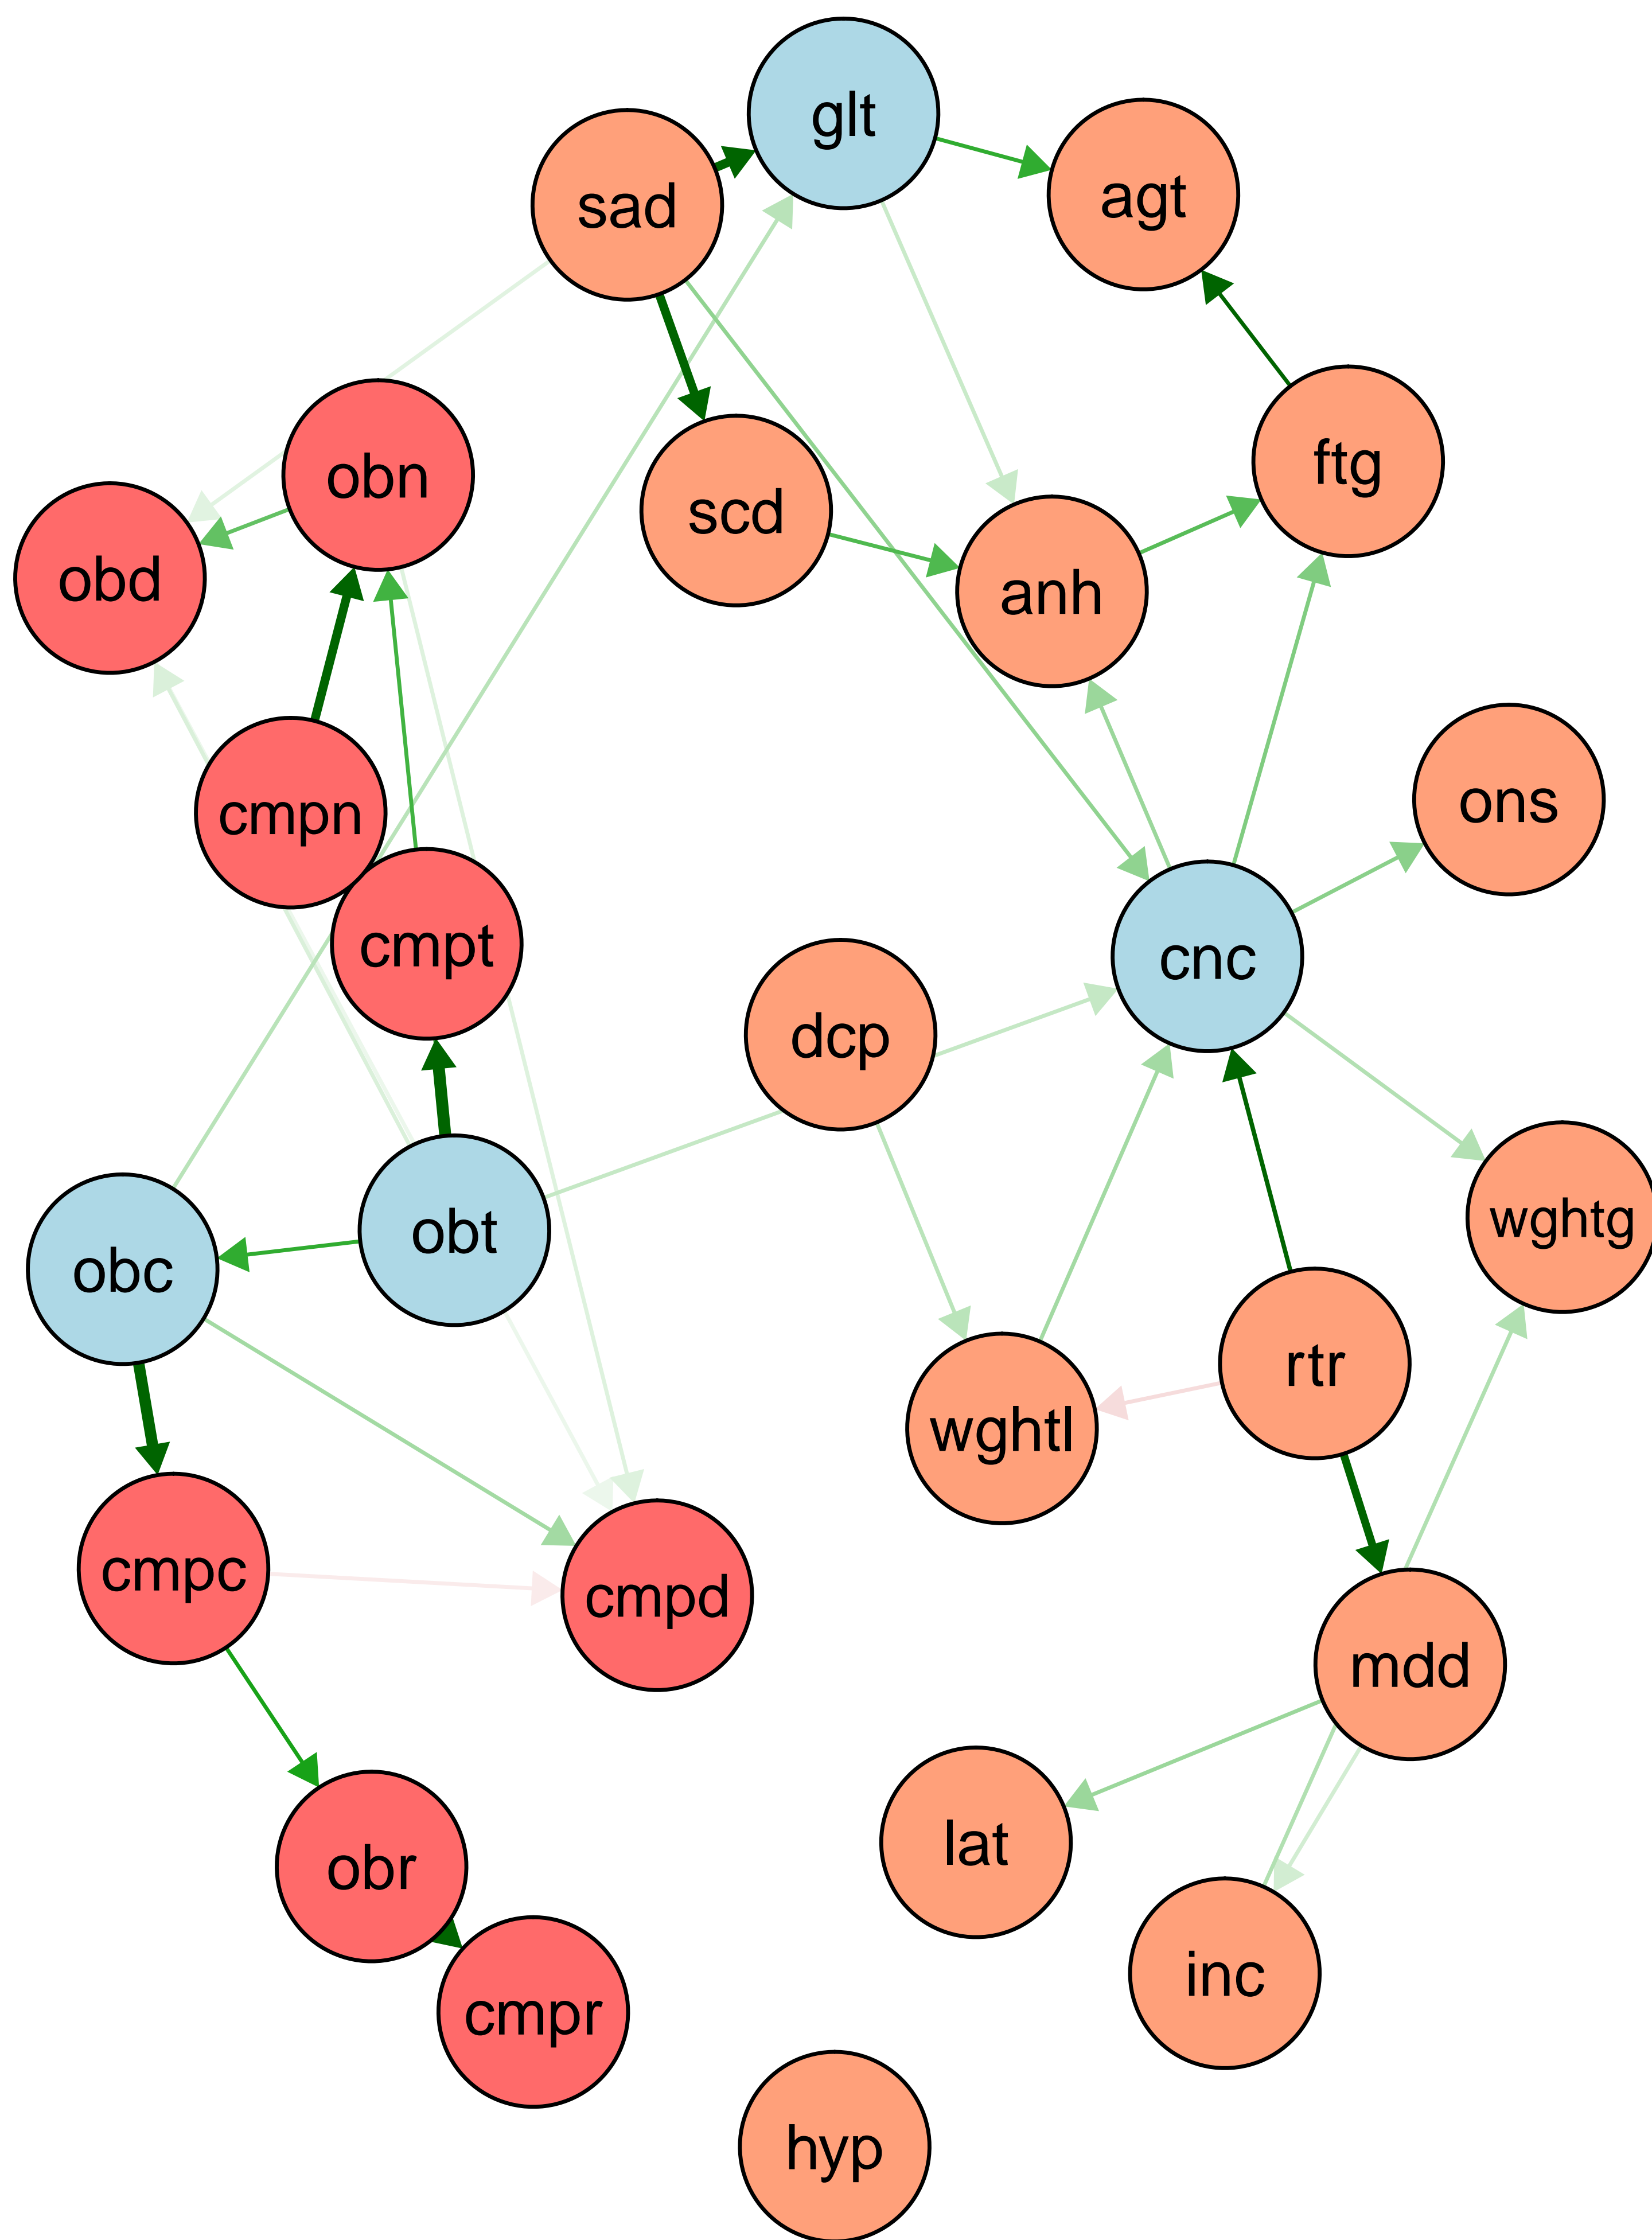

Supplement: Supplementary file 26 [file 2]

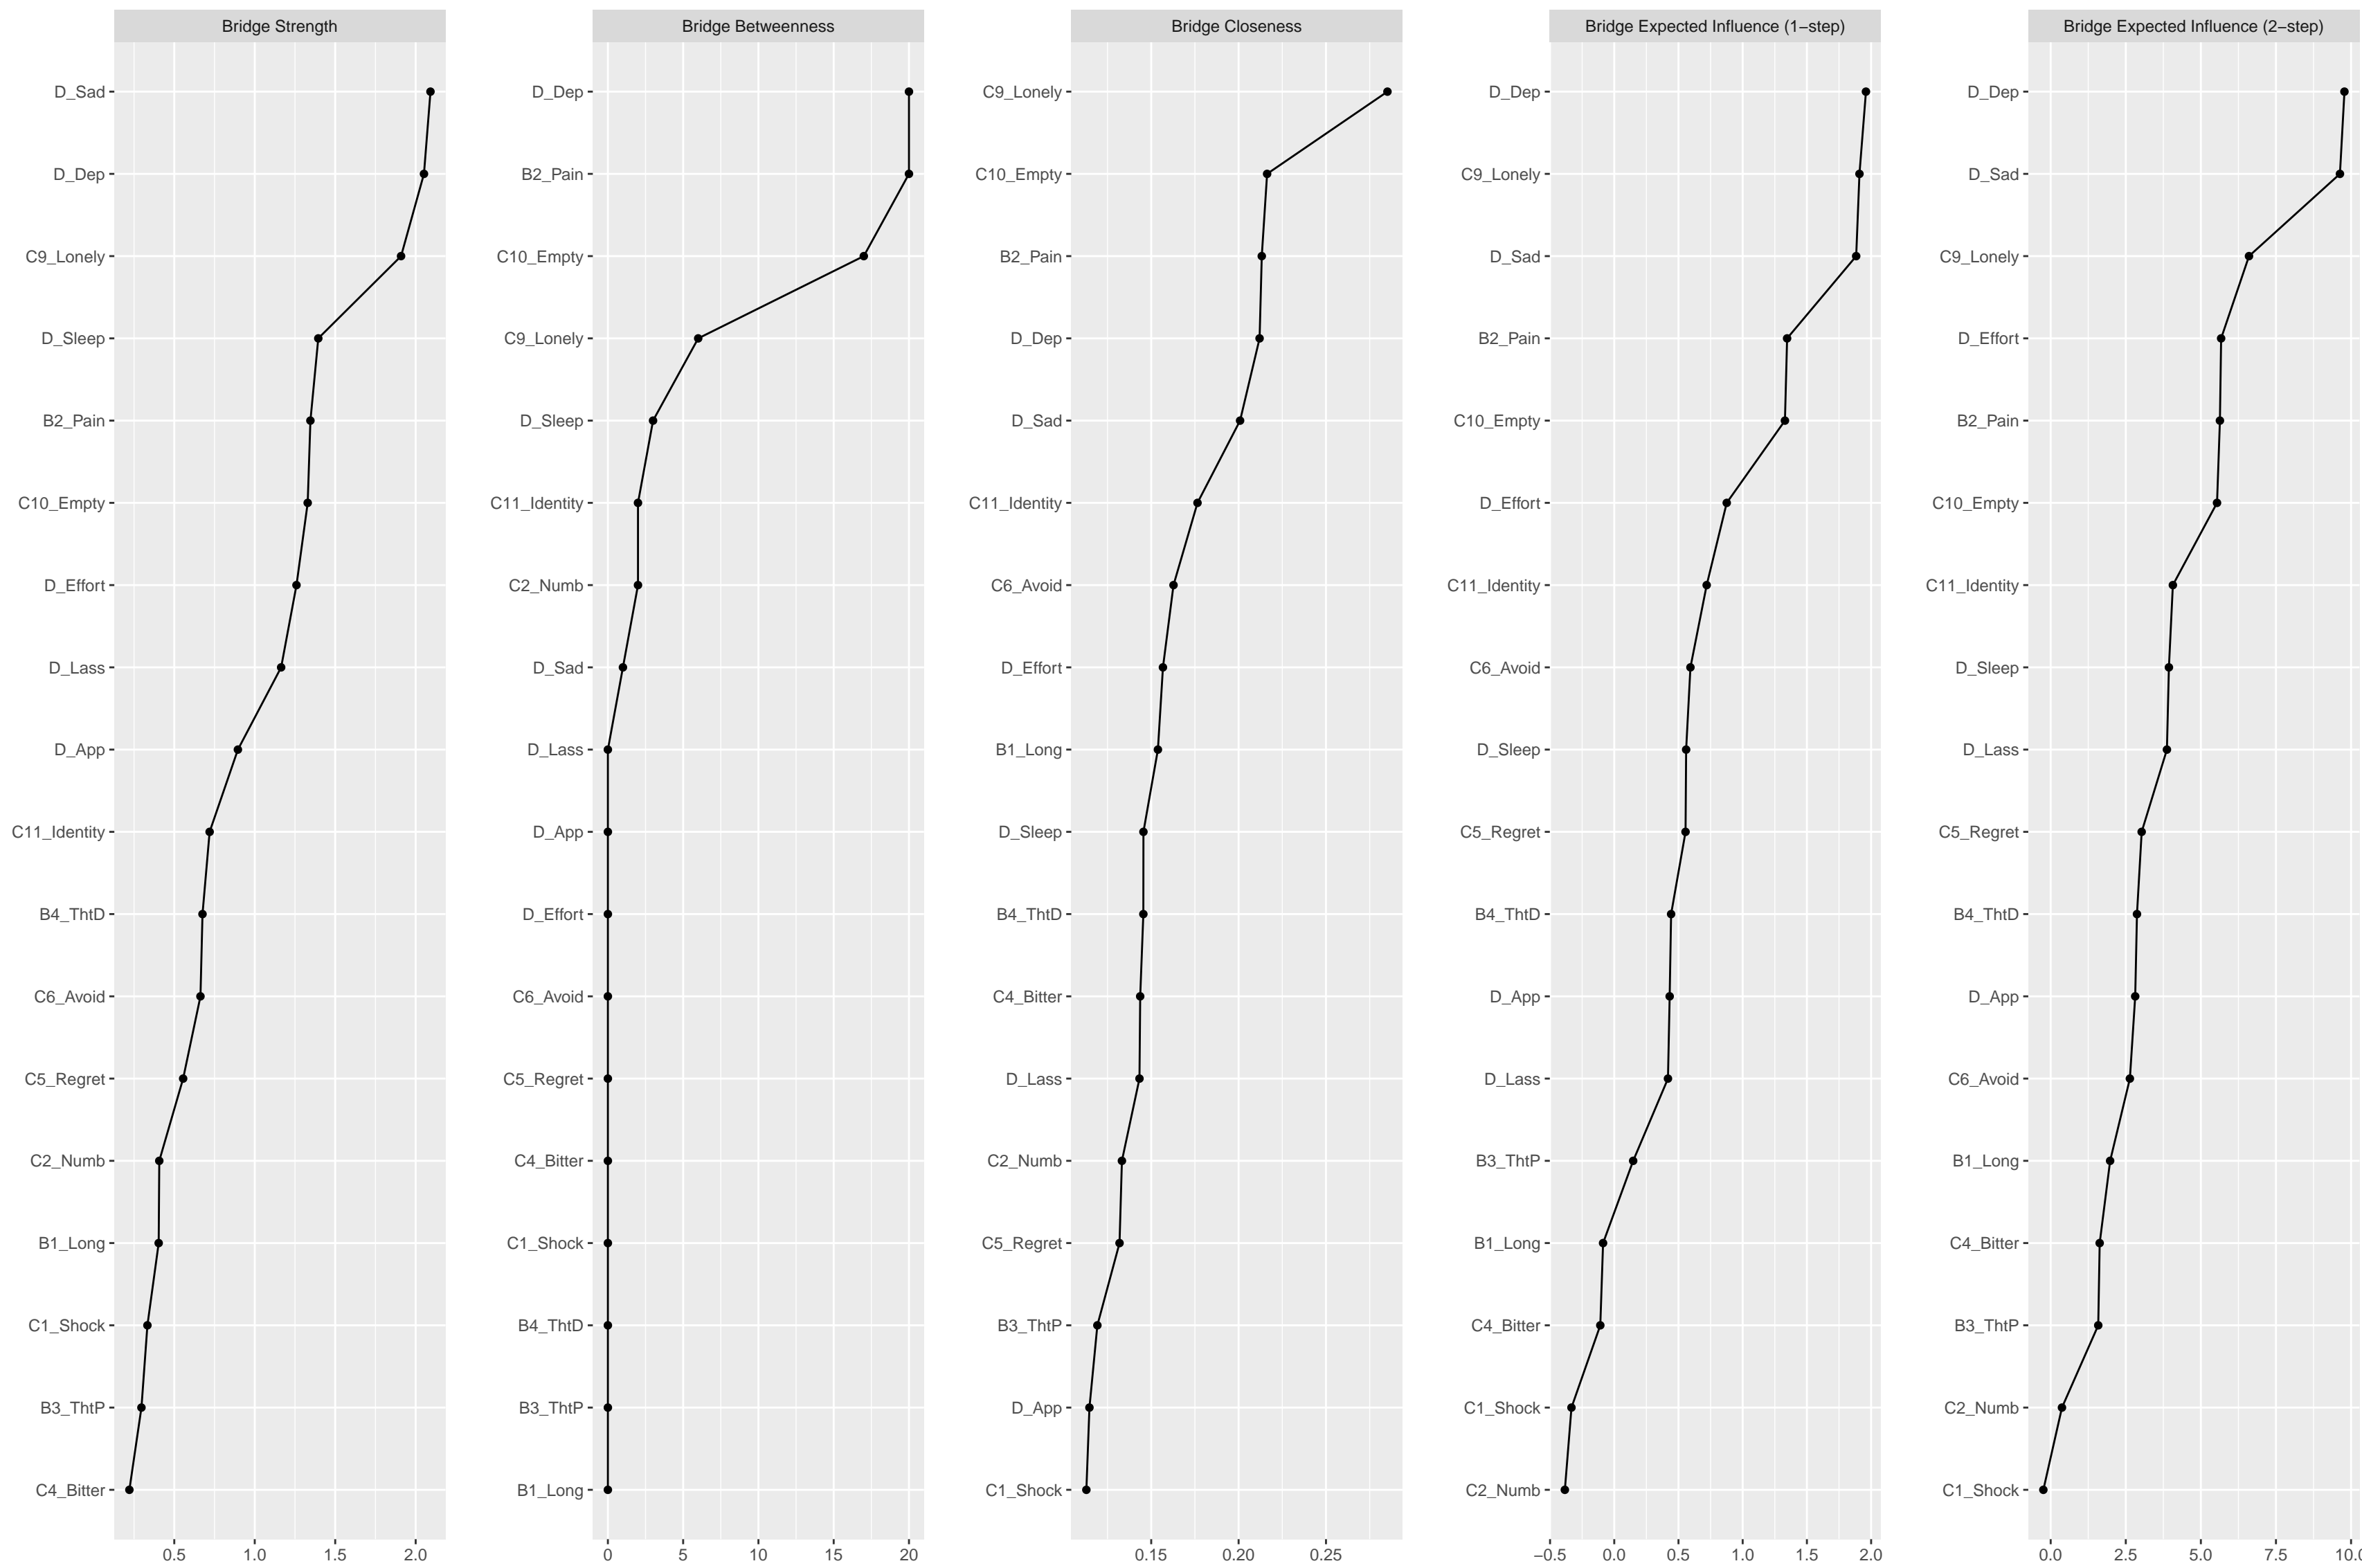

Supplement: Supplementary file 27 [file 2]

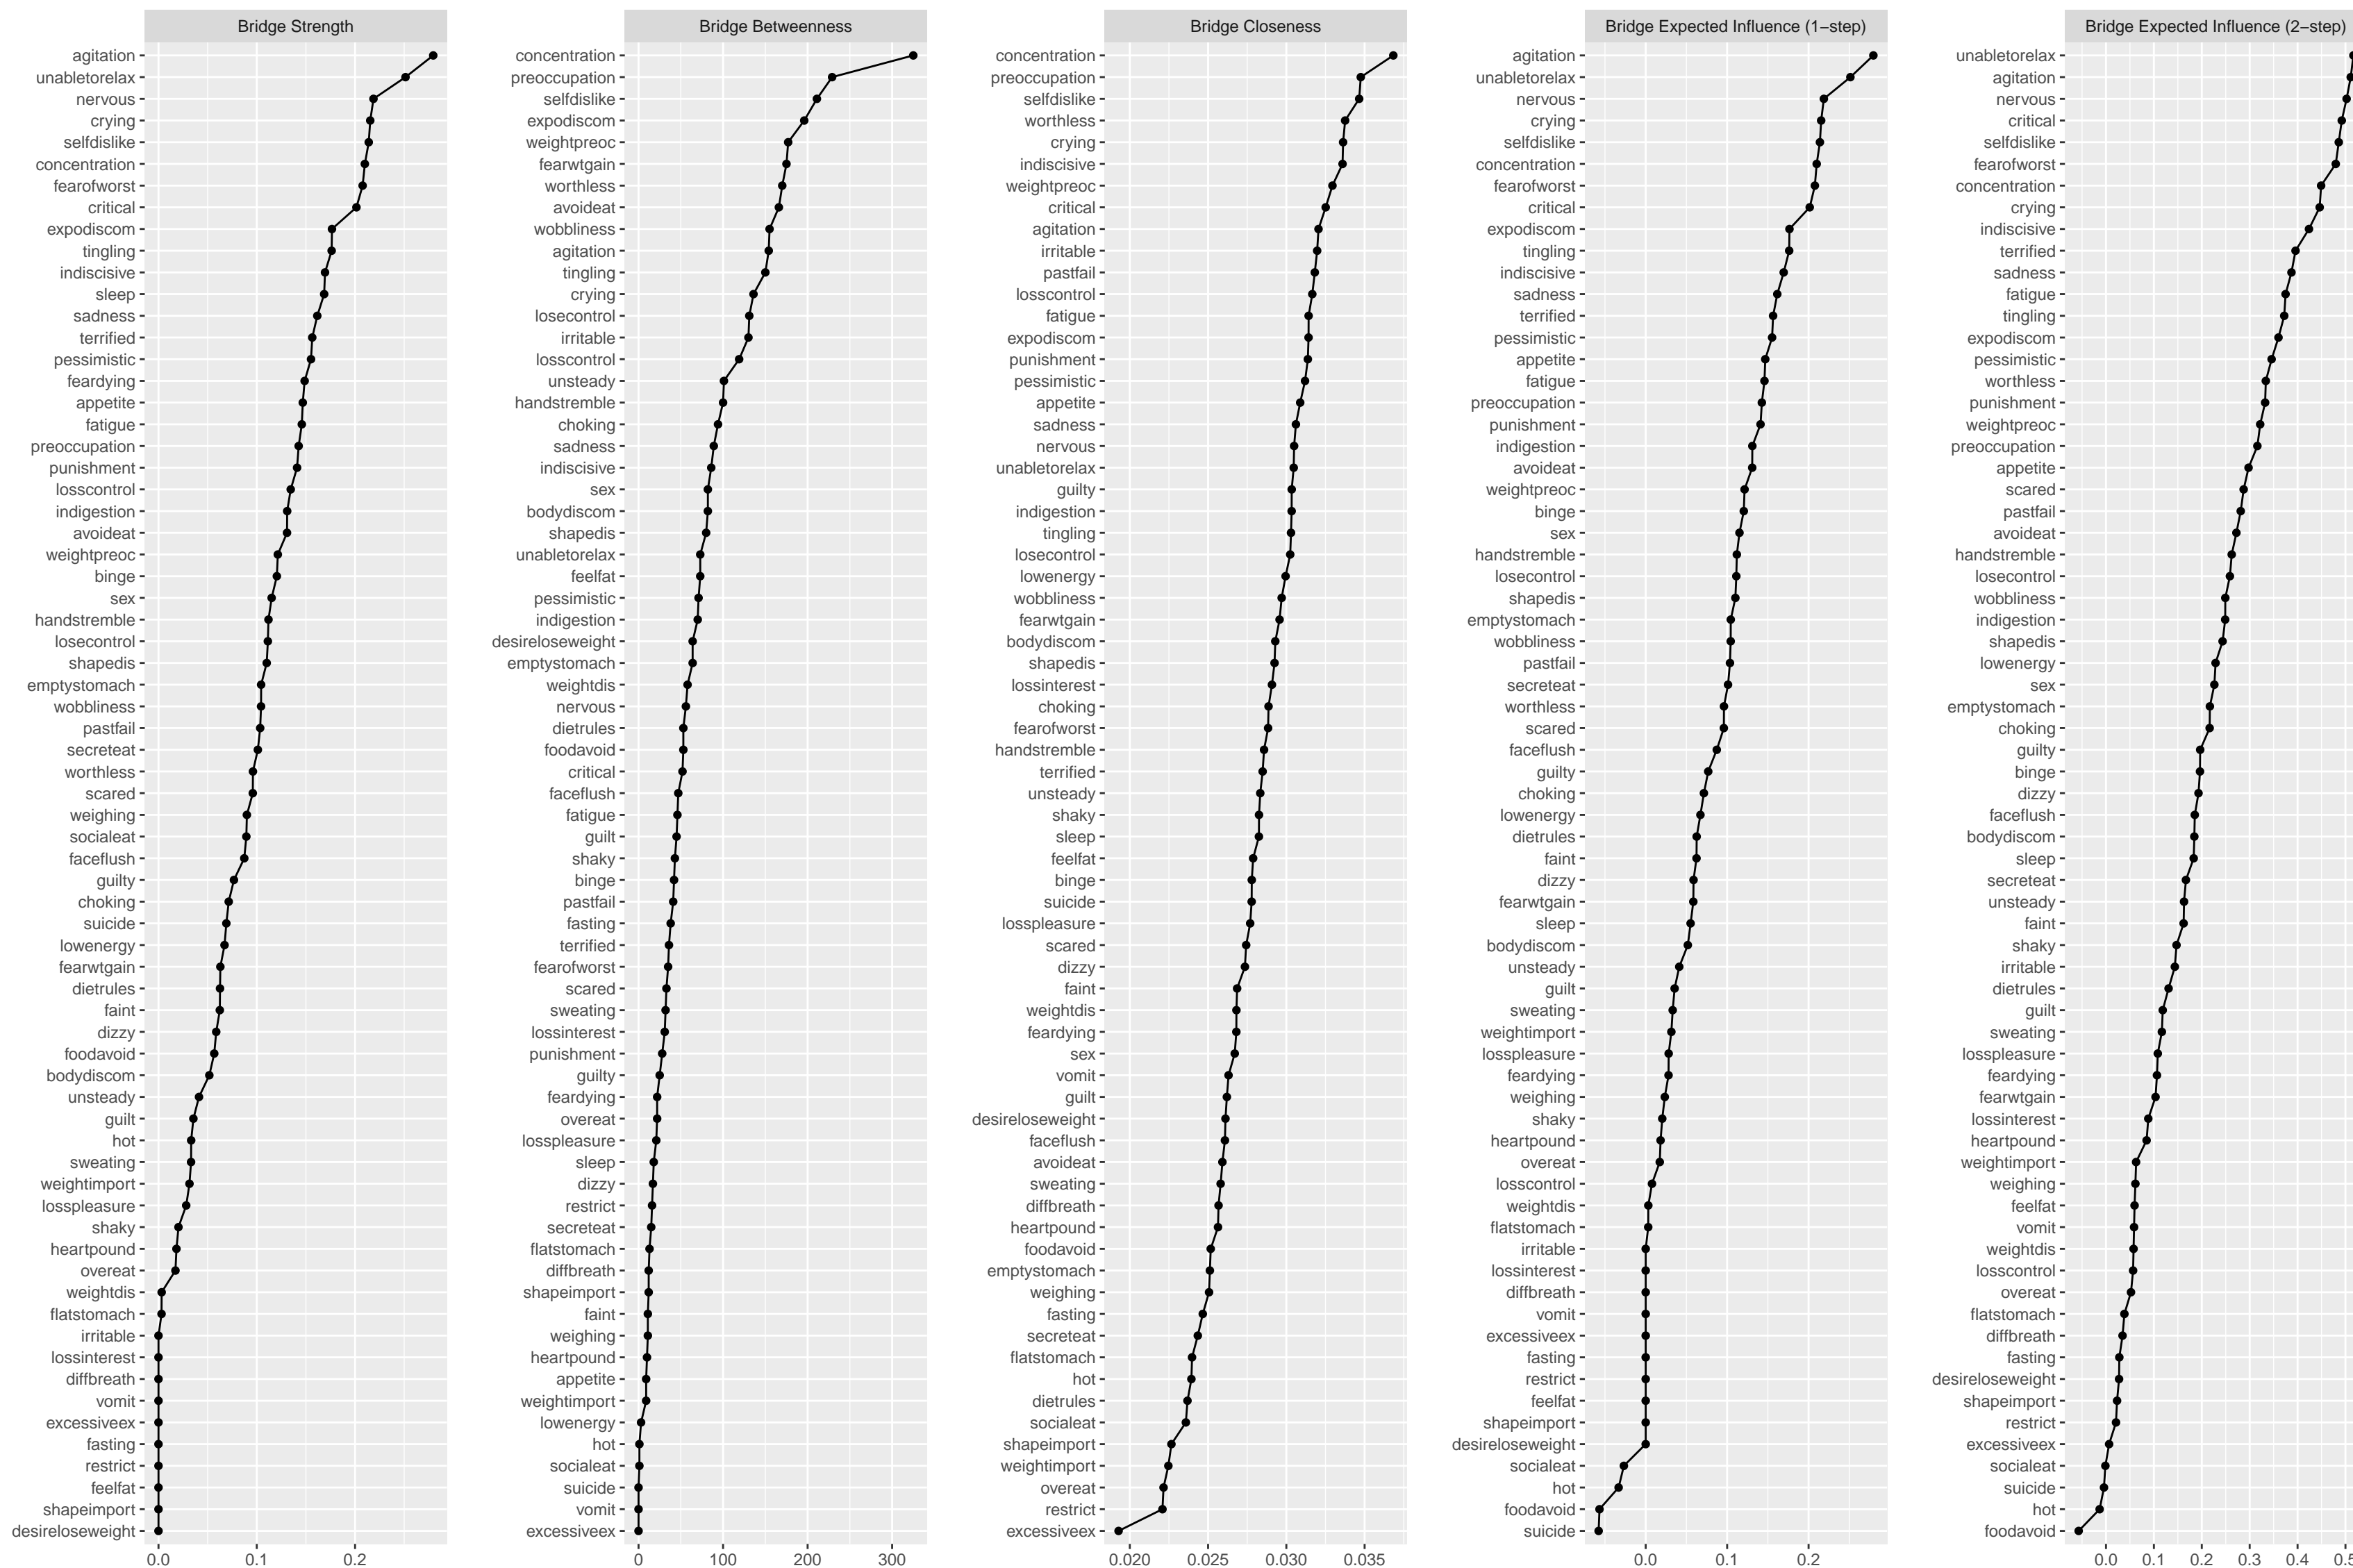

Supplement: Supplementary file 28 [file 2]

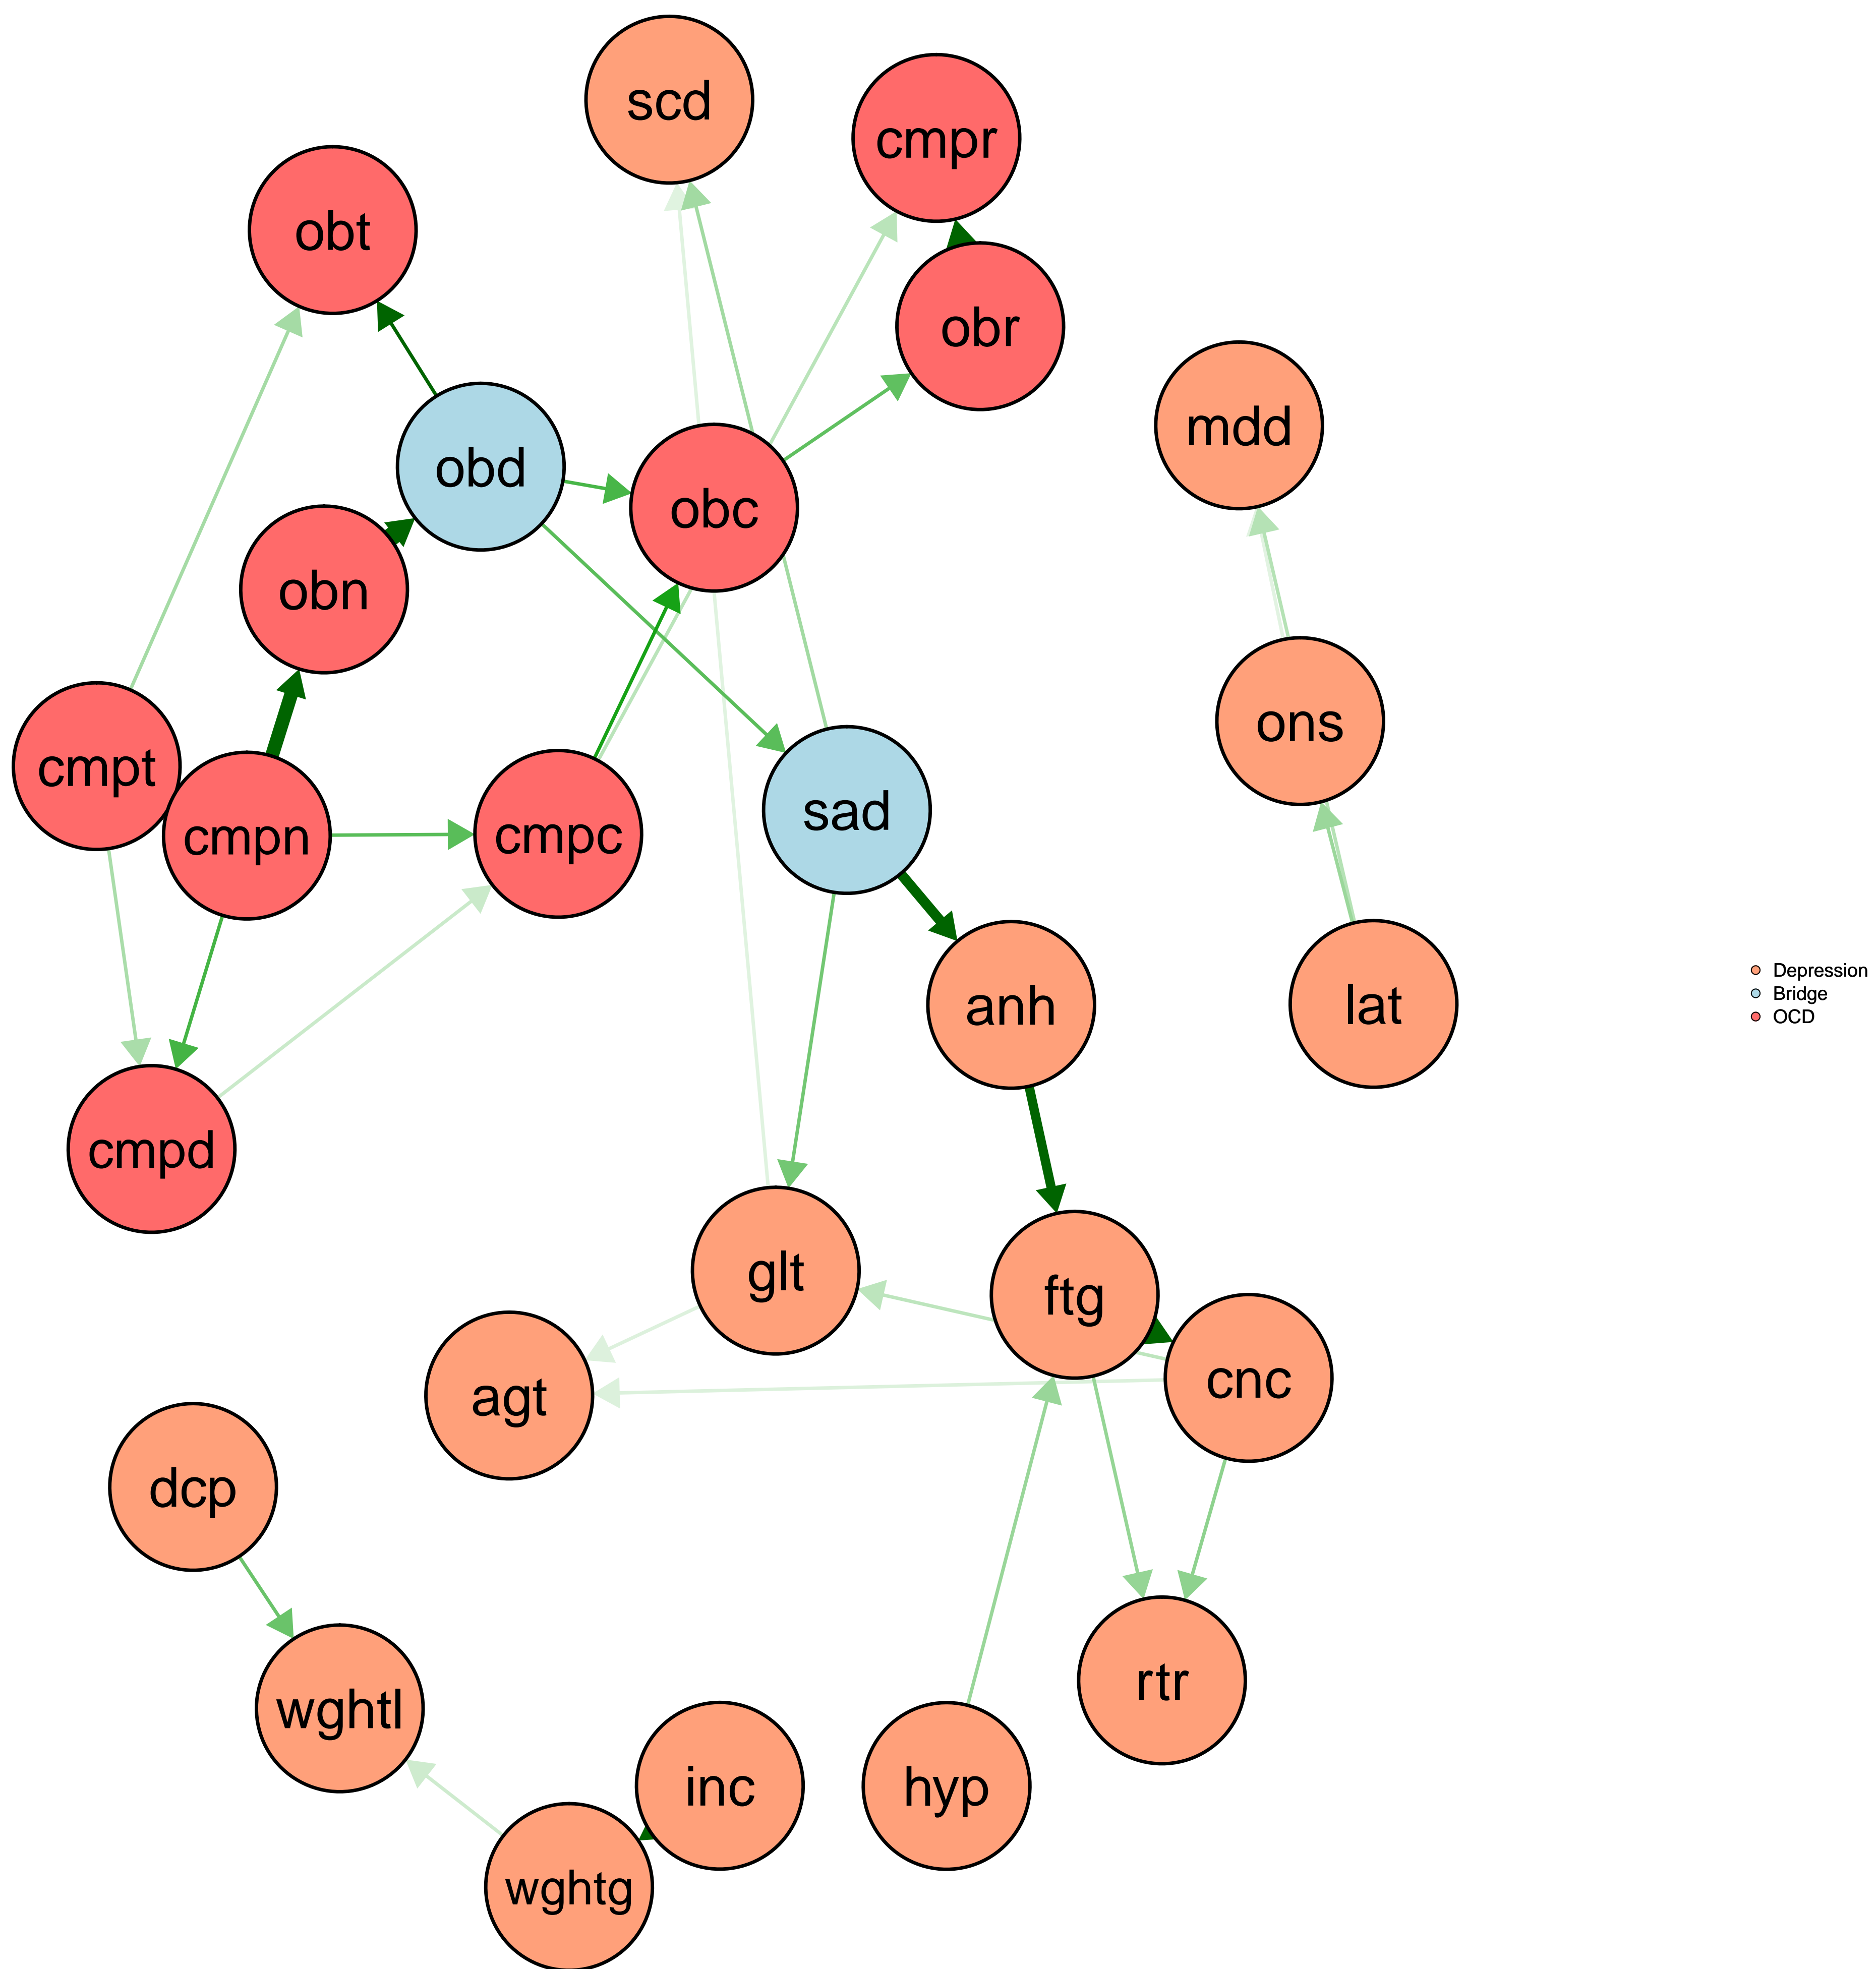

Supplement: Supplementary file 29 [file 2]

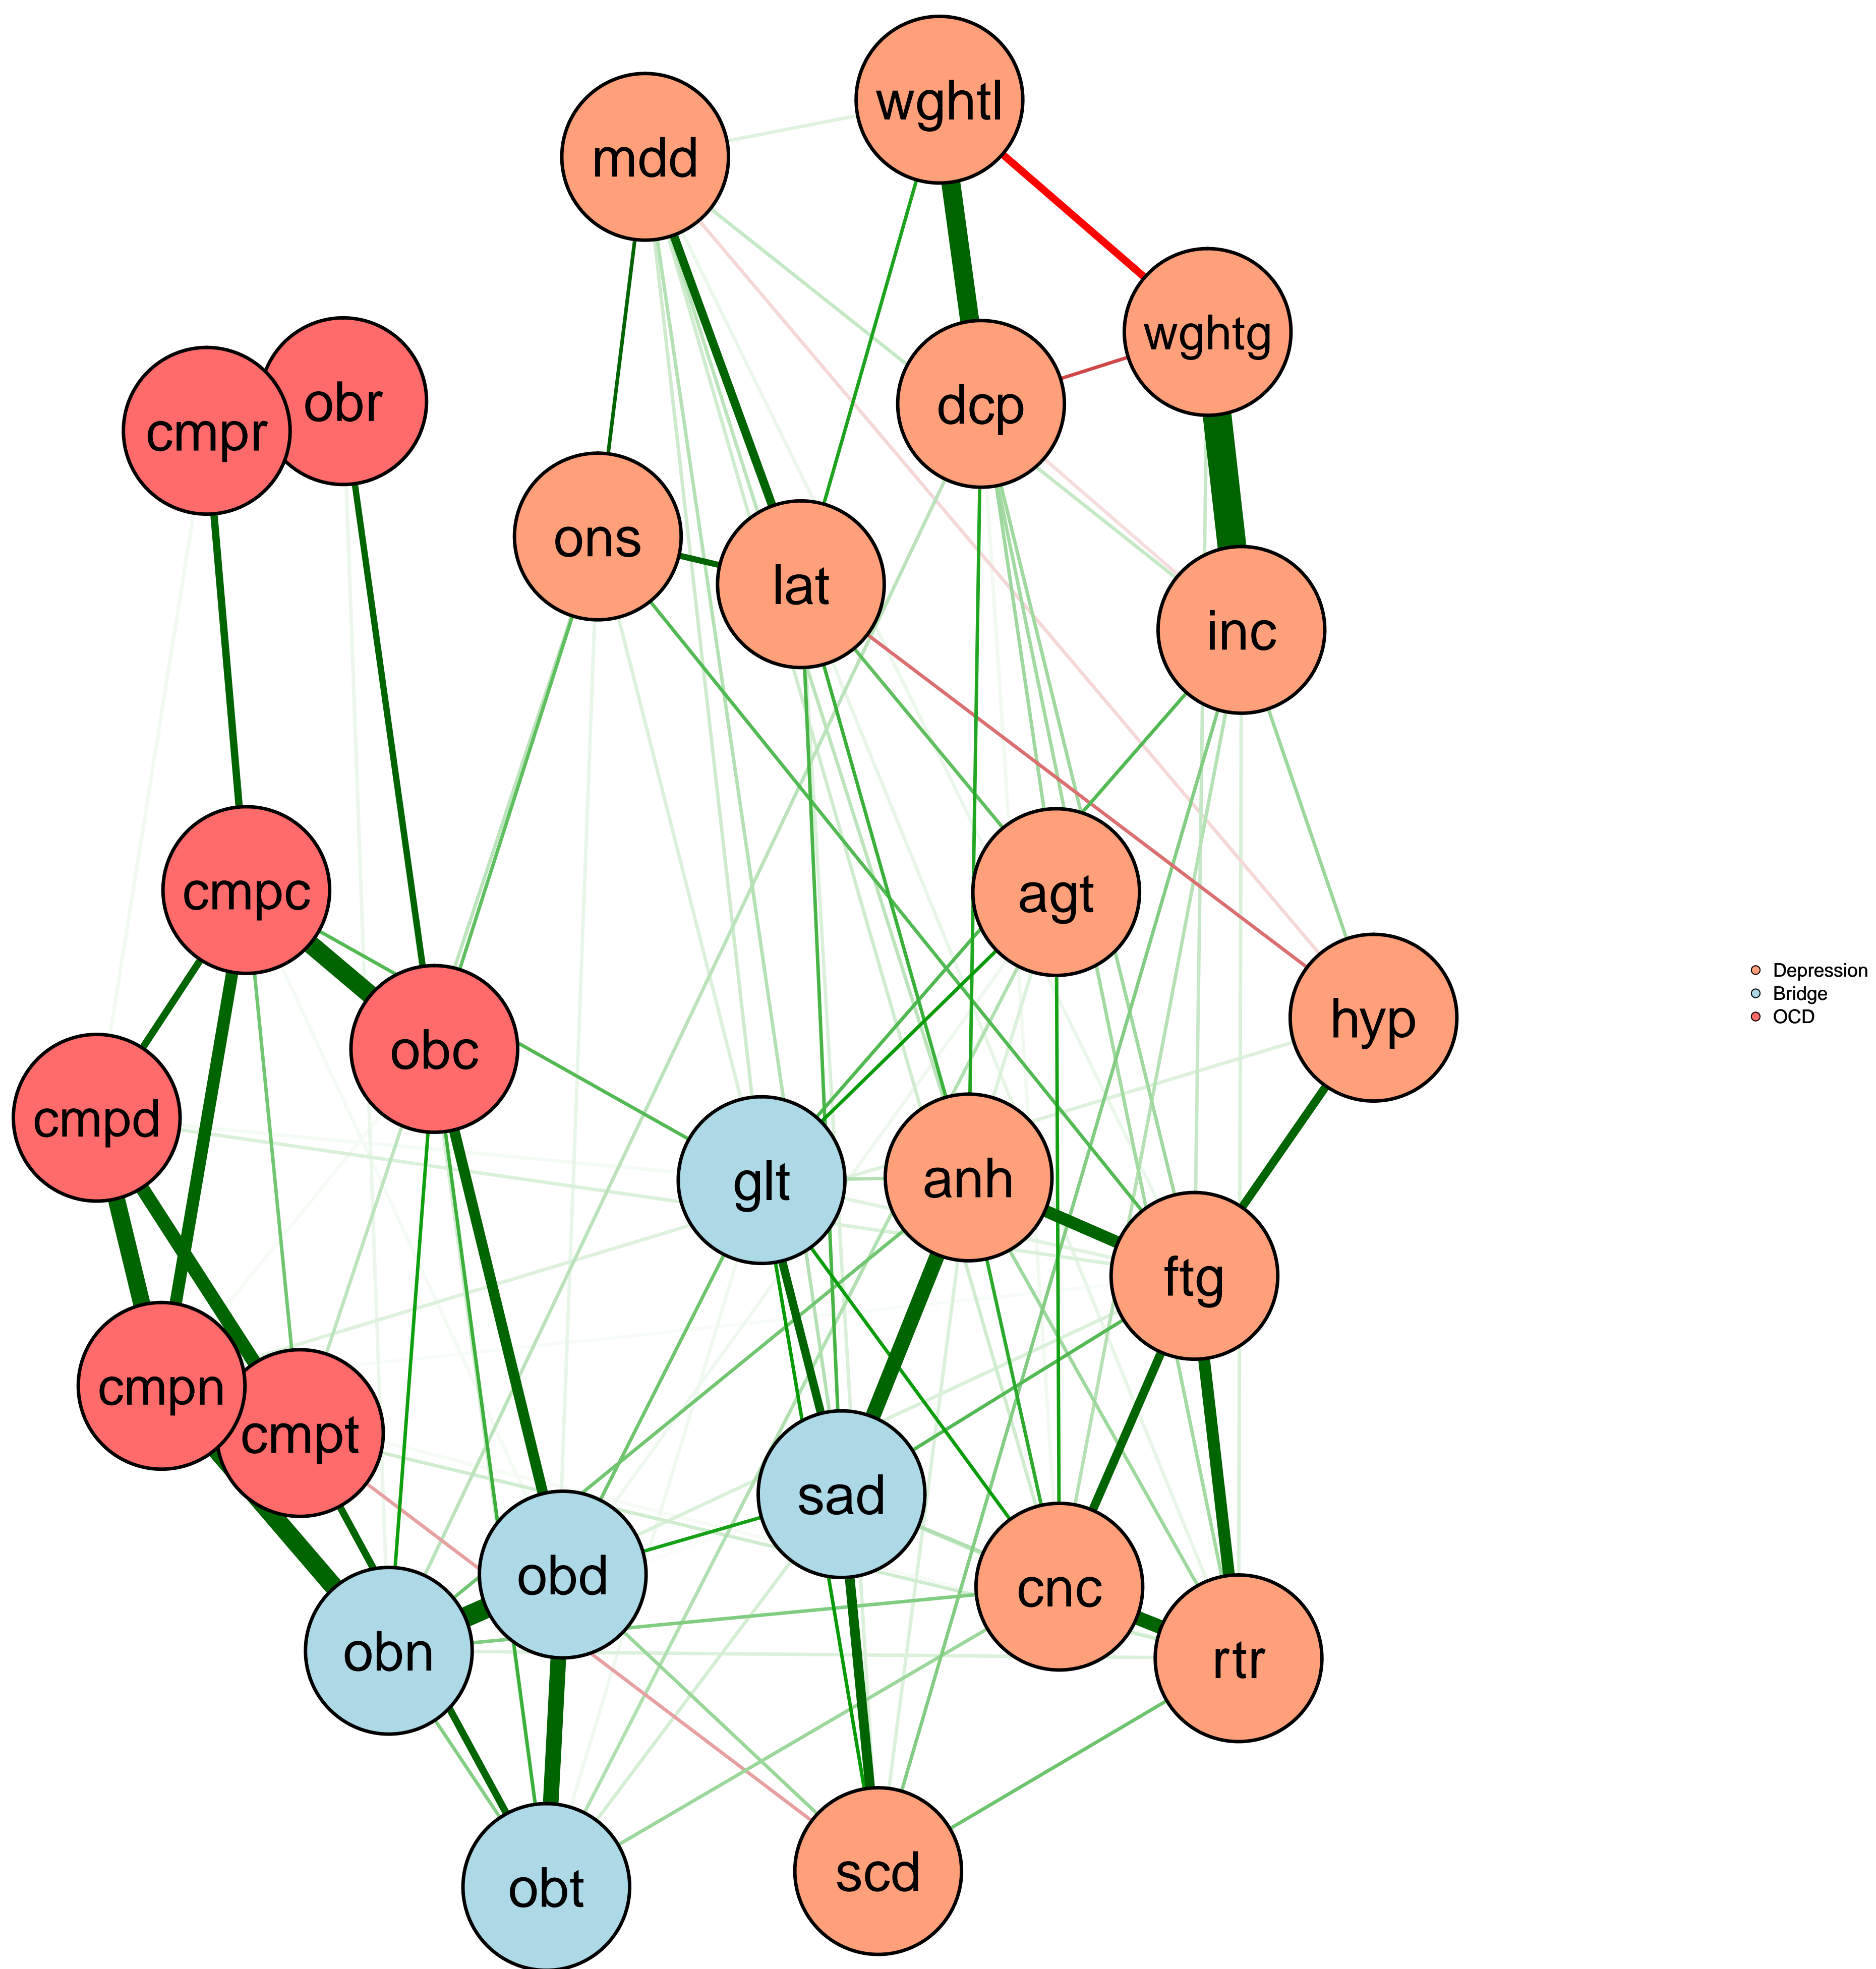

Supplement: Supplementary file 30 [file 2]

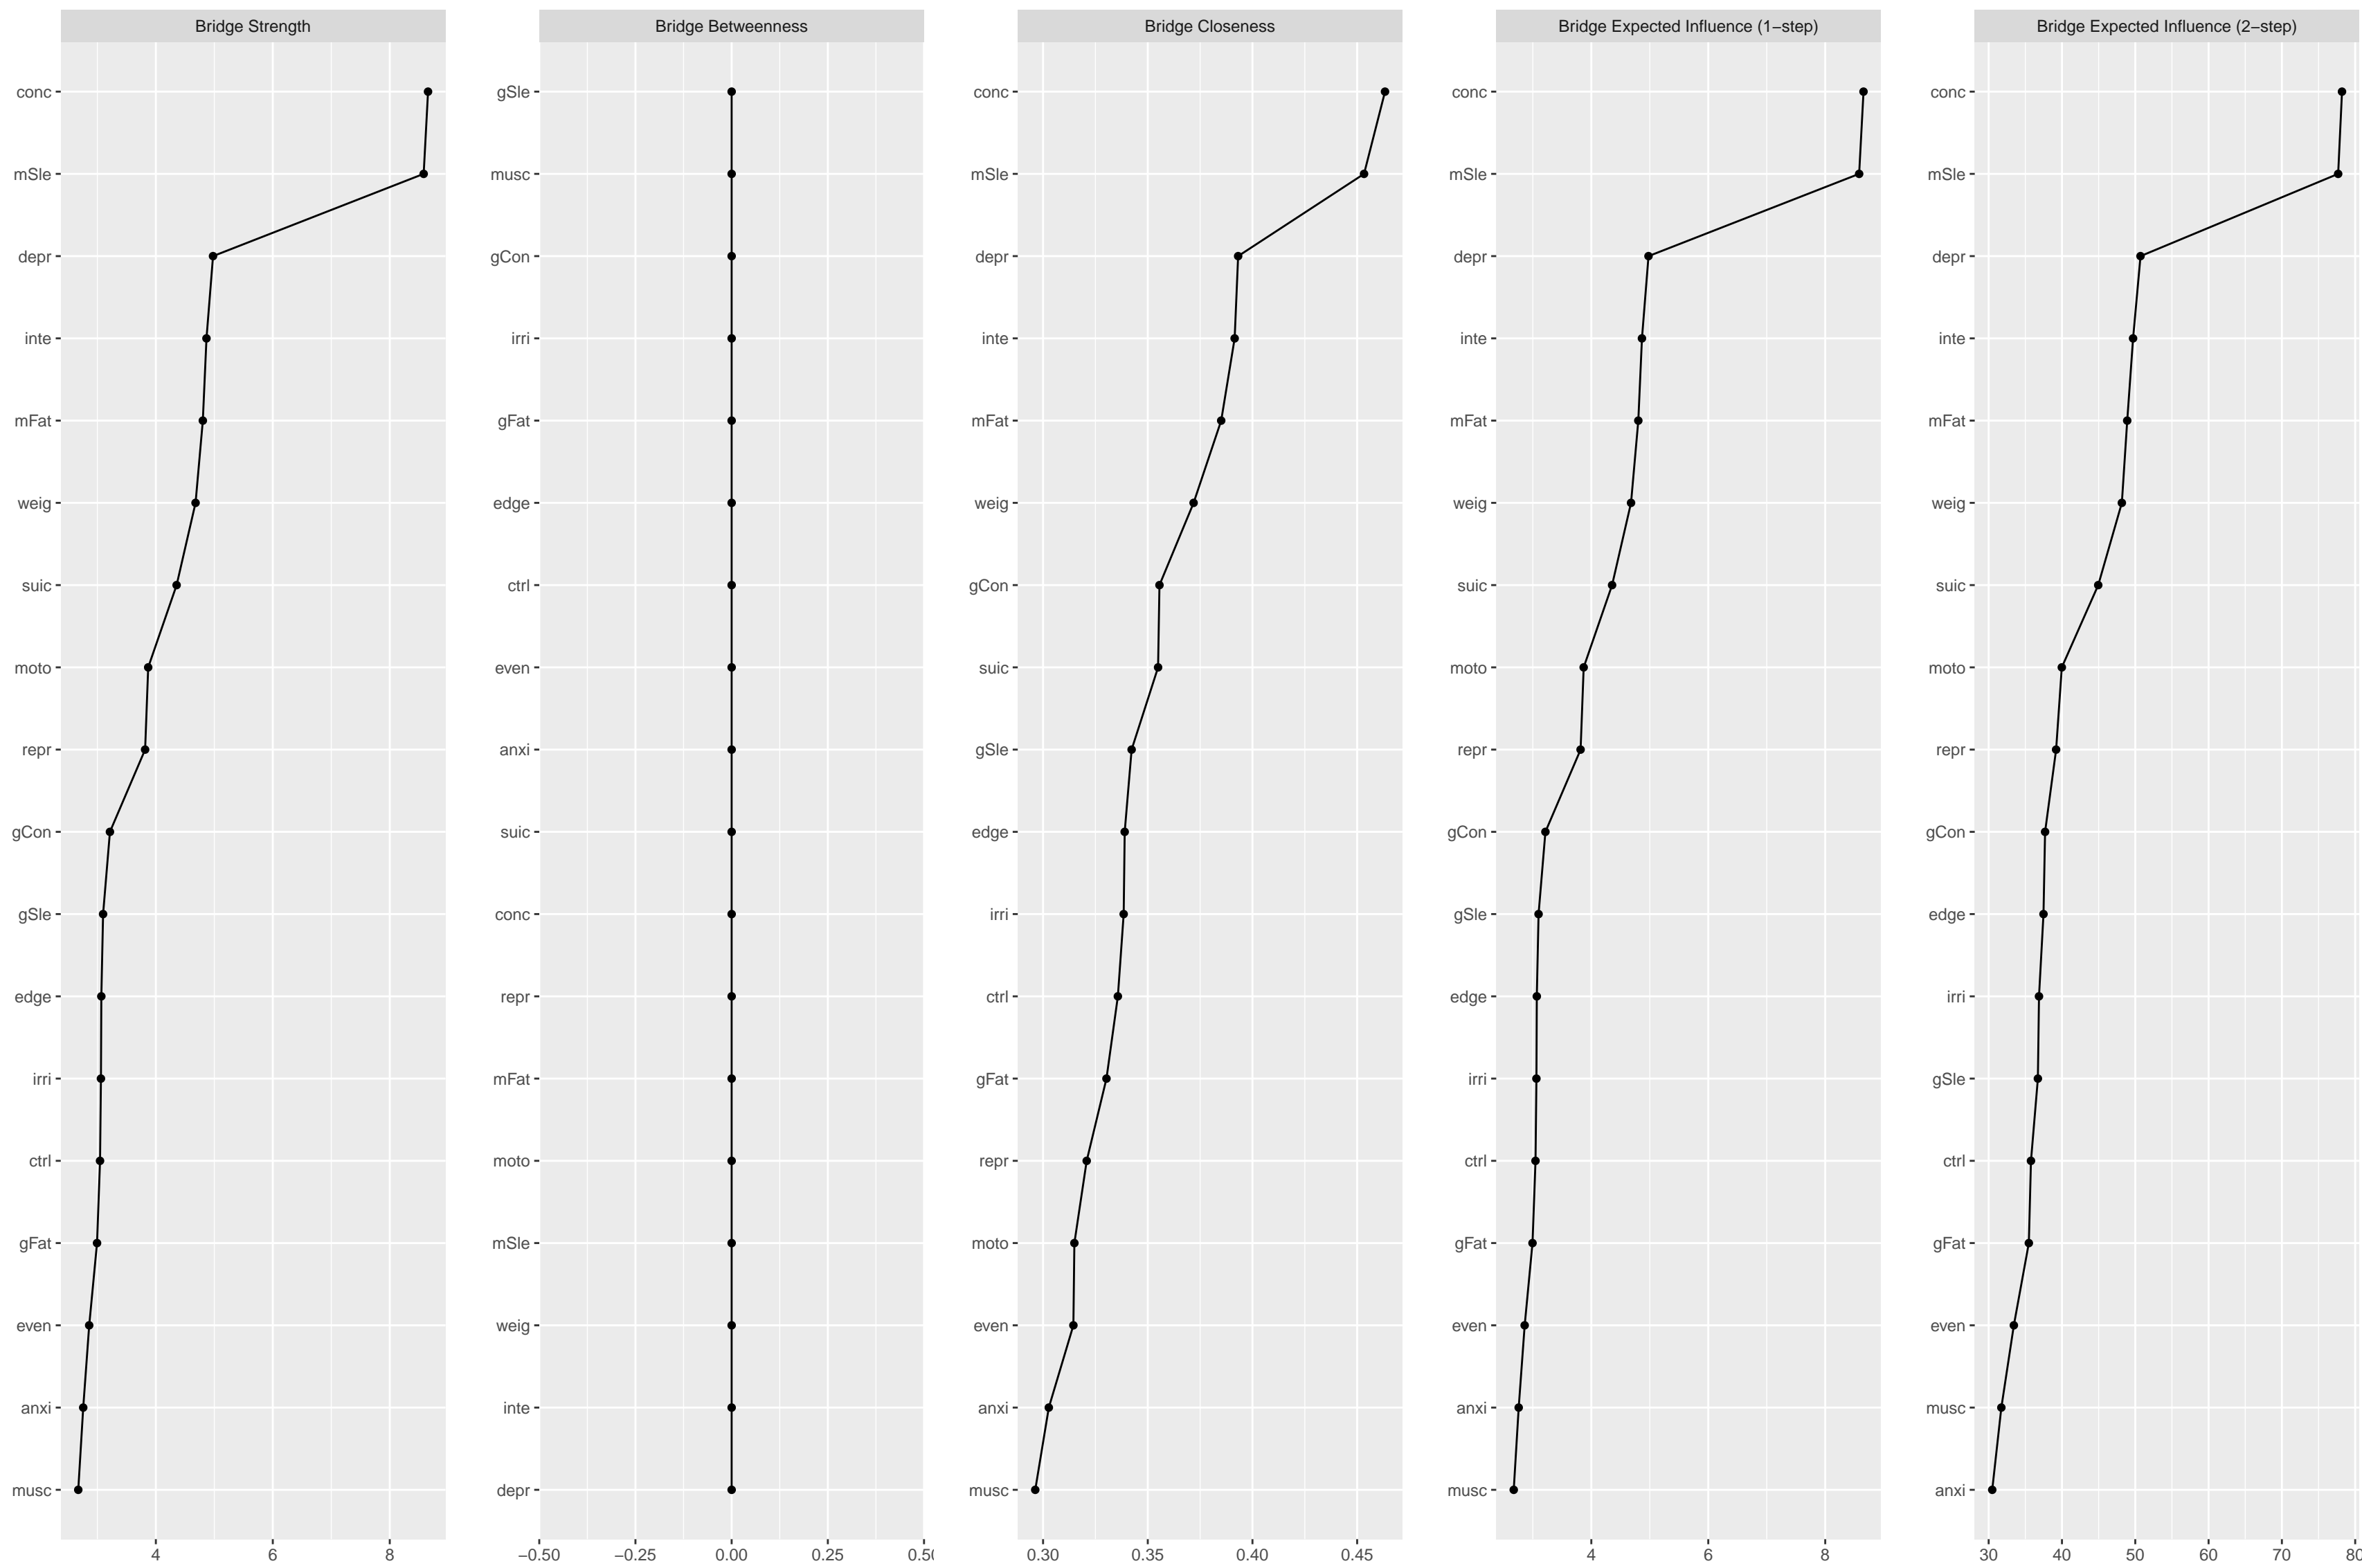

Supplement: Supplementary file 31 [file 2]

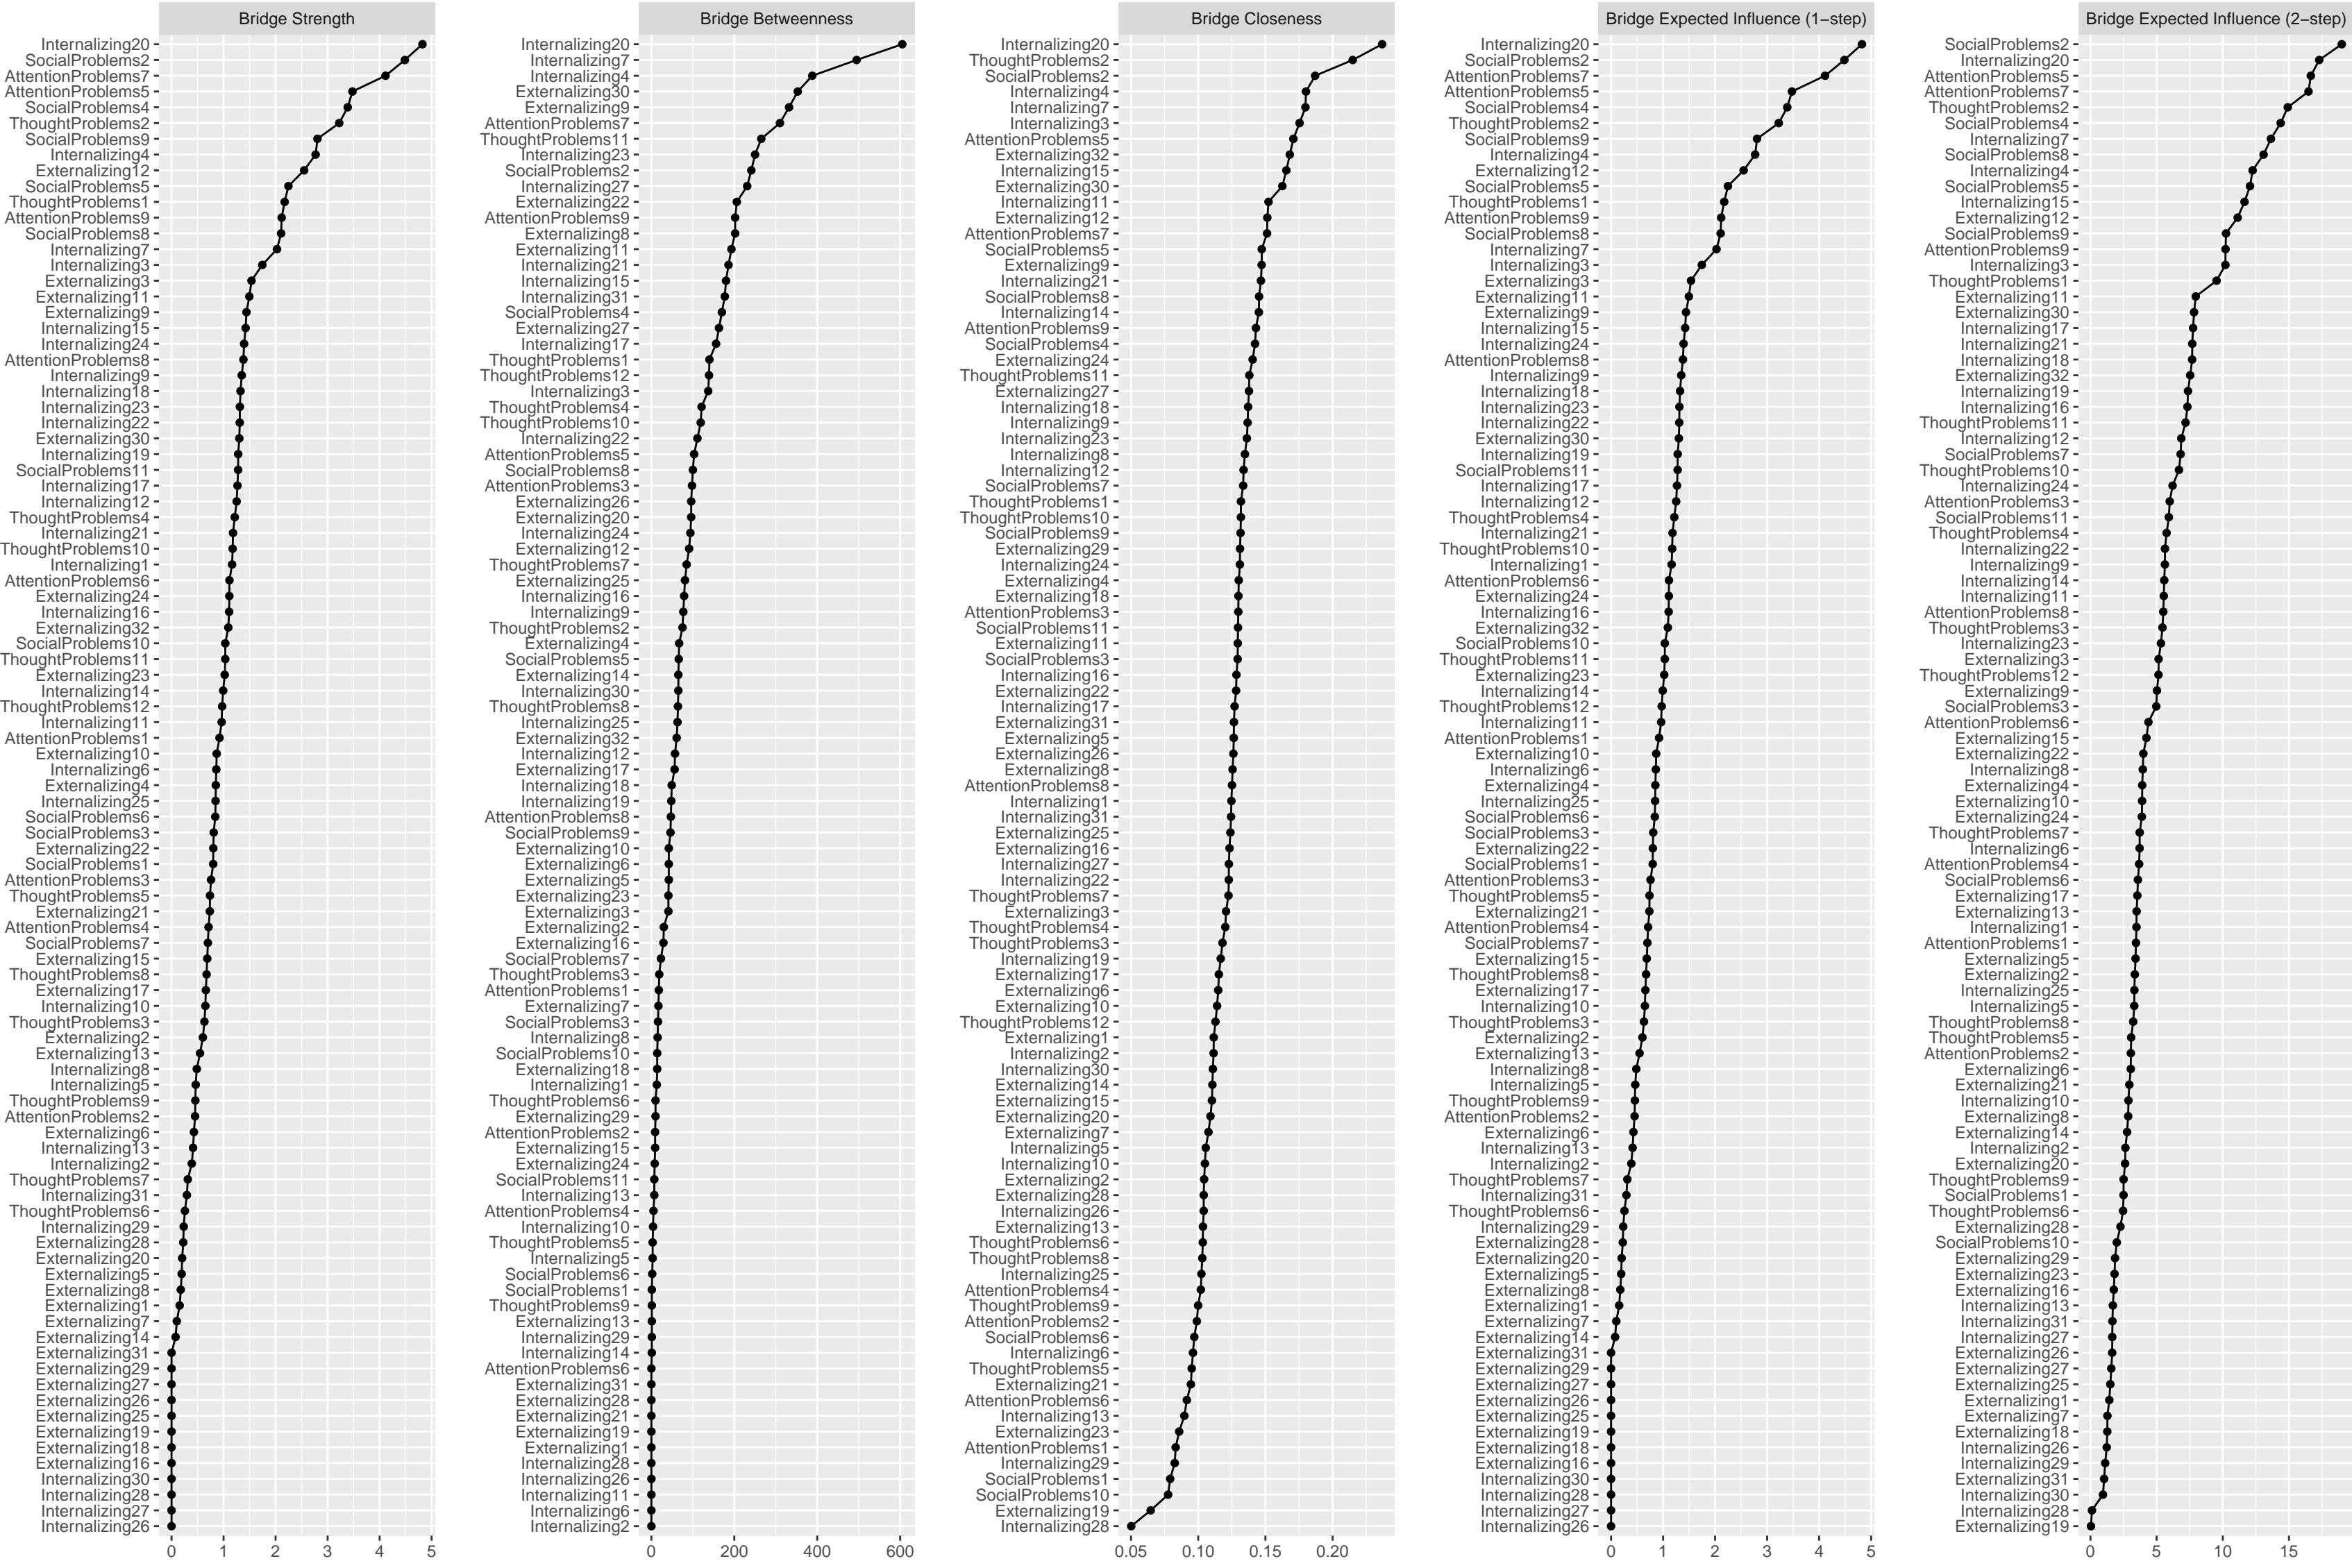

Supplement: Supplementary file 33 [file 2]

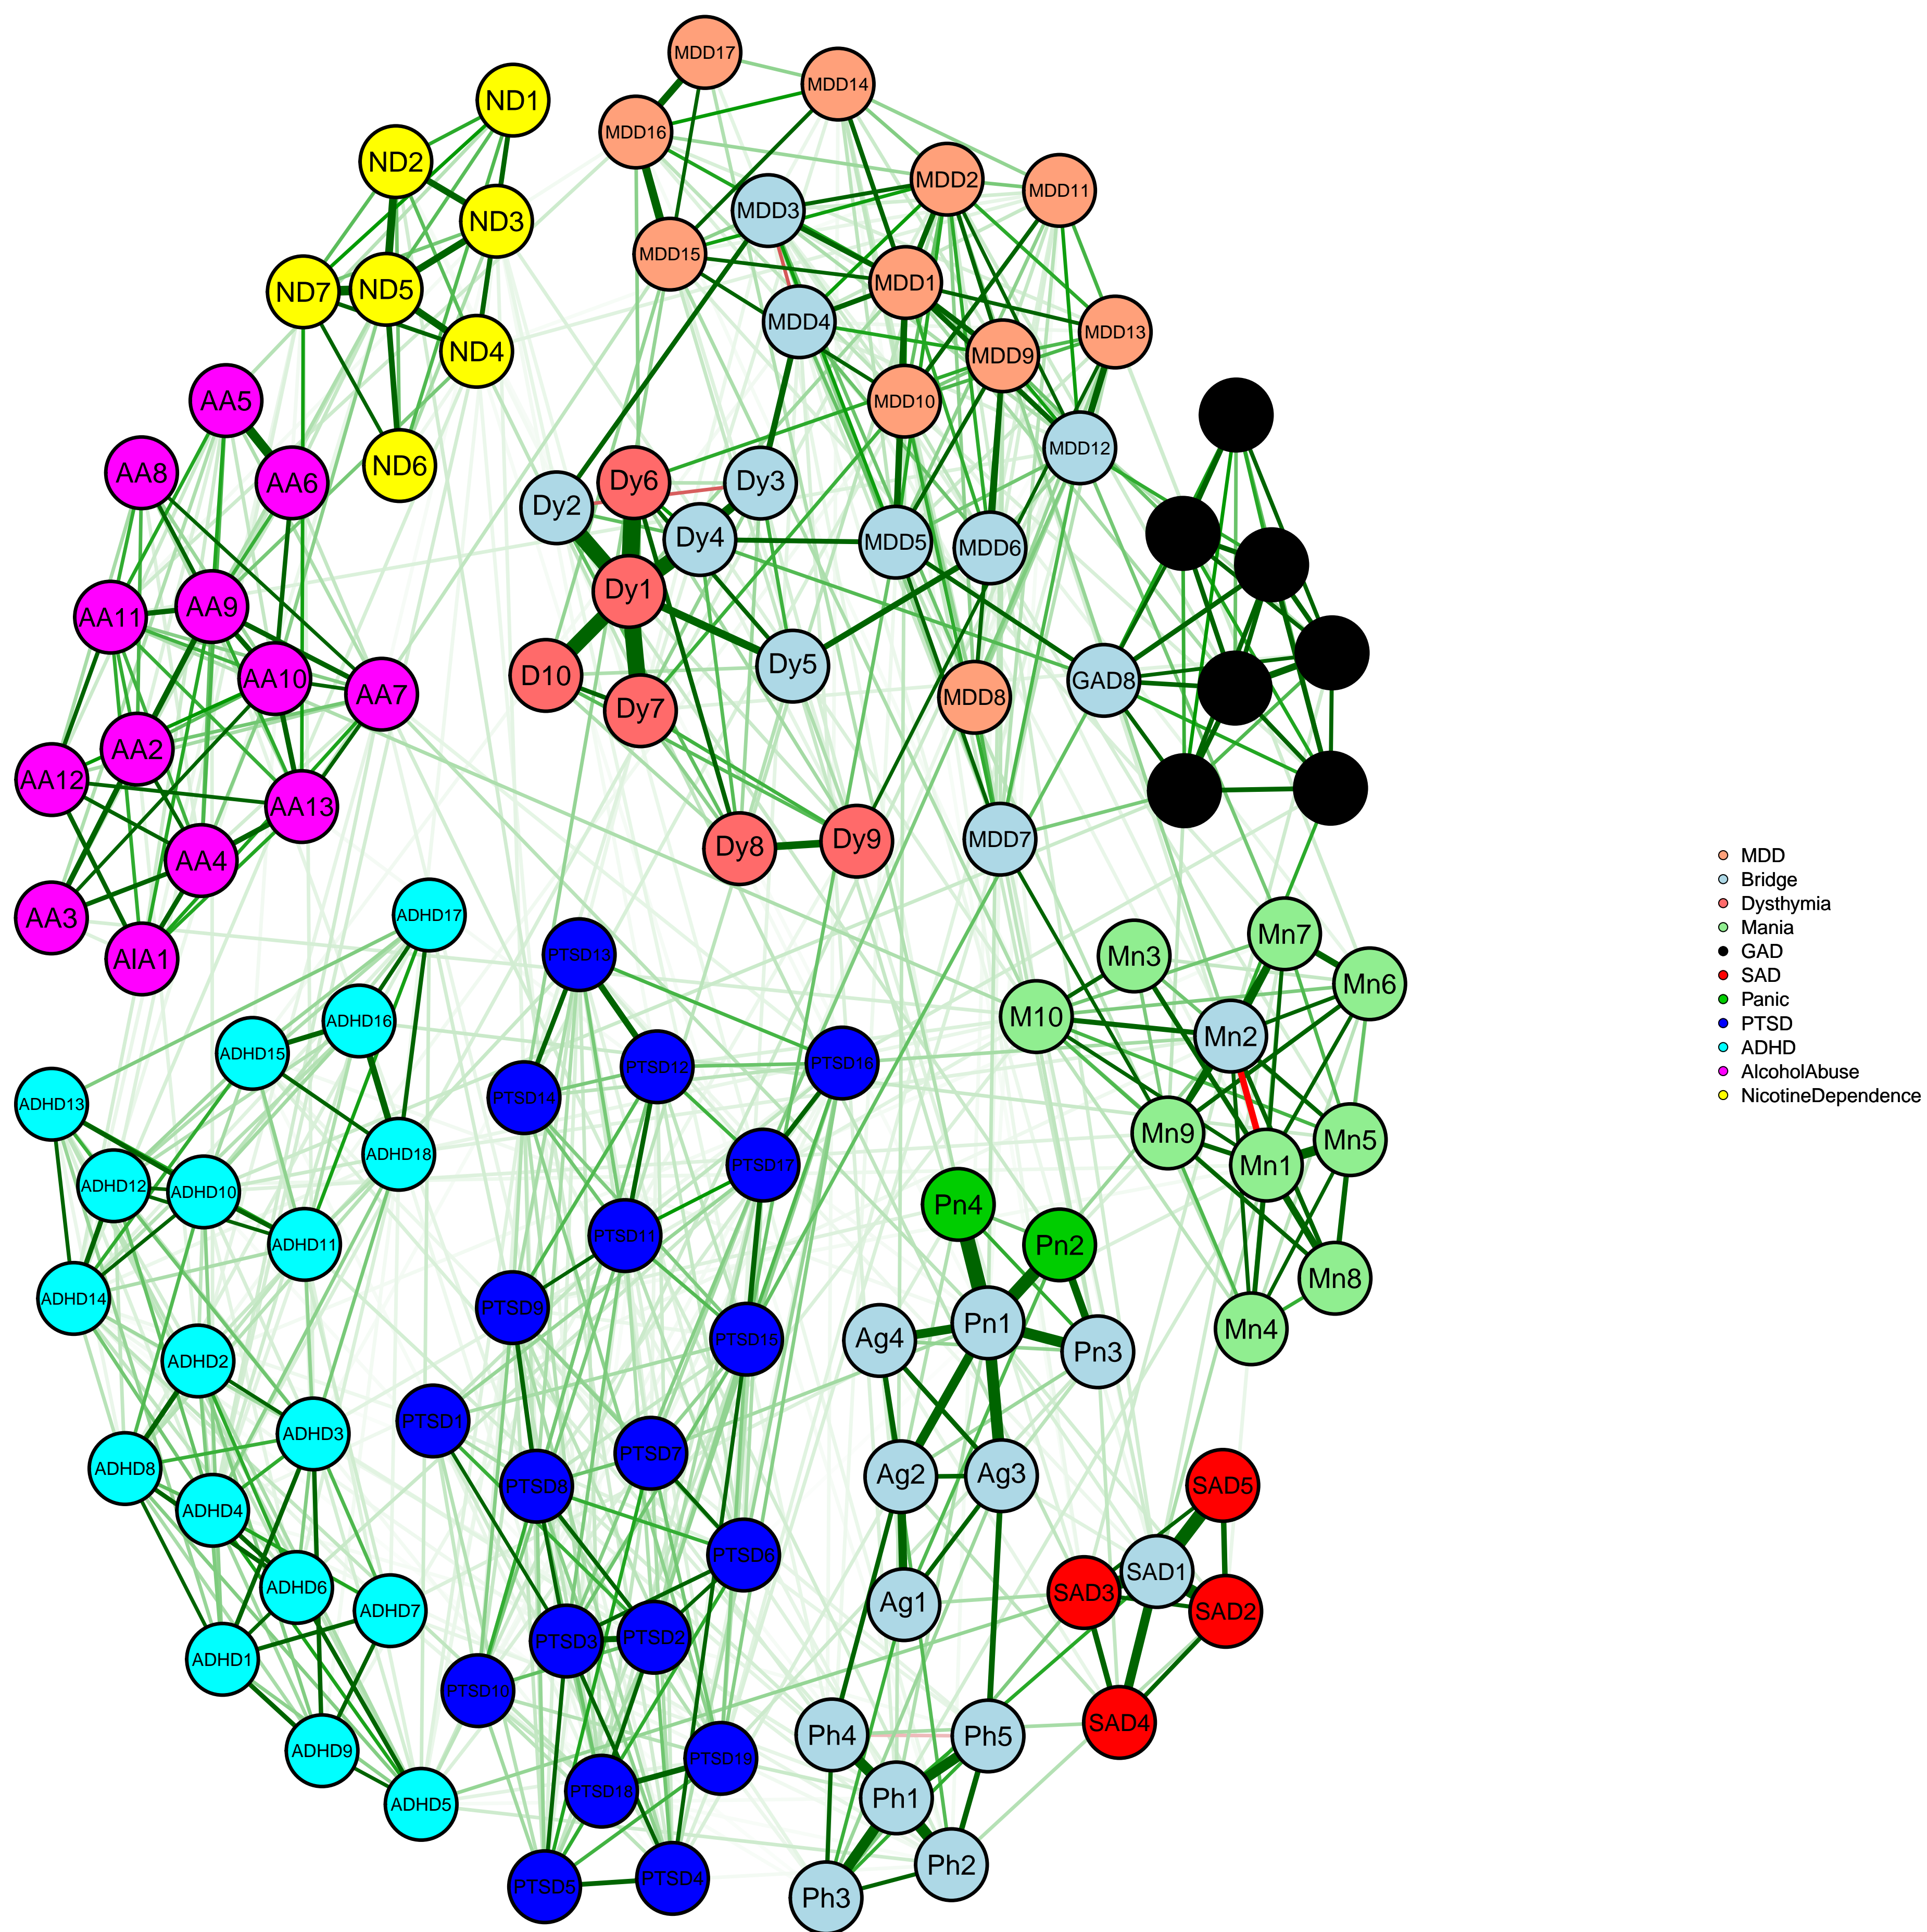

Supplement: Supplementary file 34 [file 2]

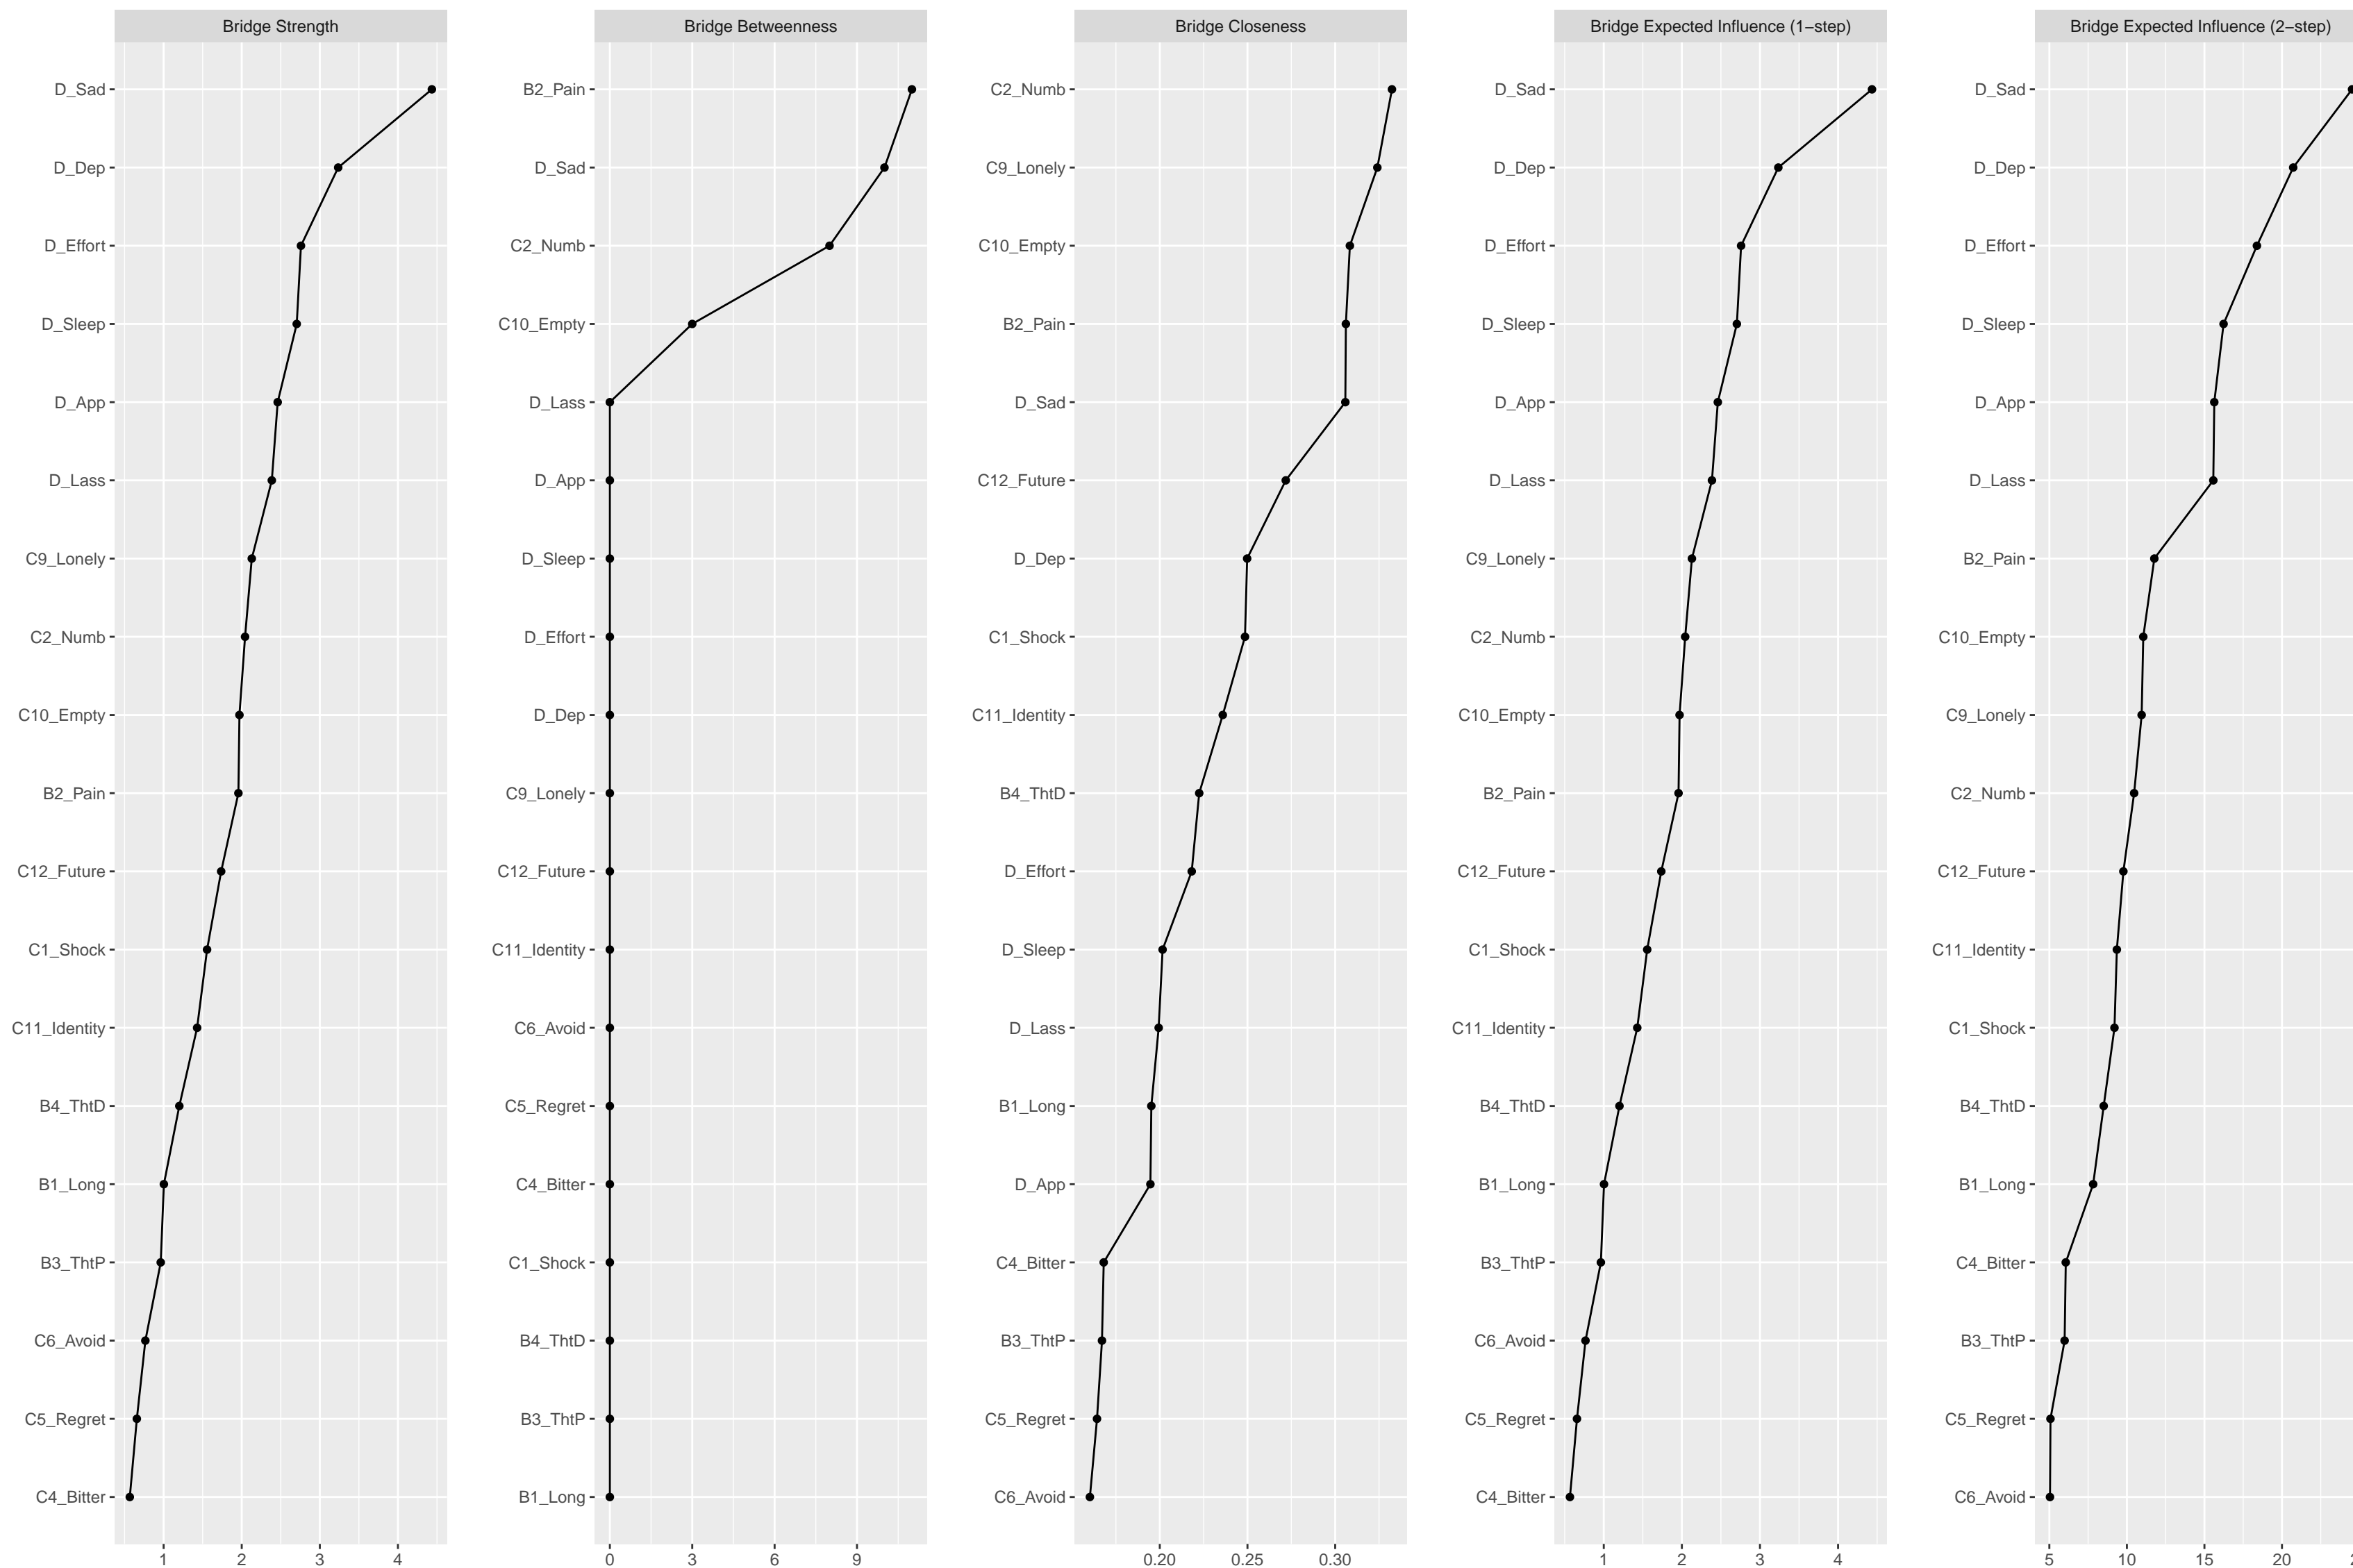

Supplement: Supplementary file 35 [file 2]

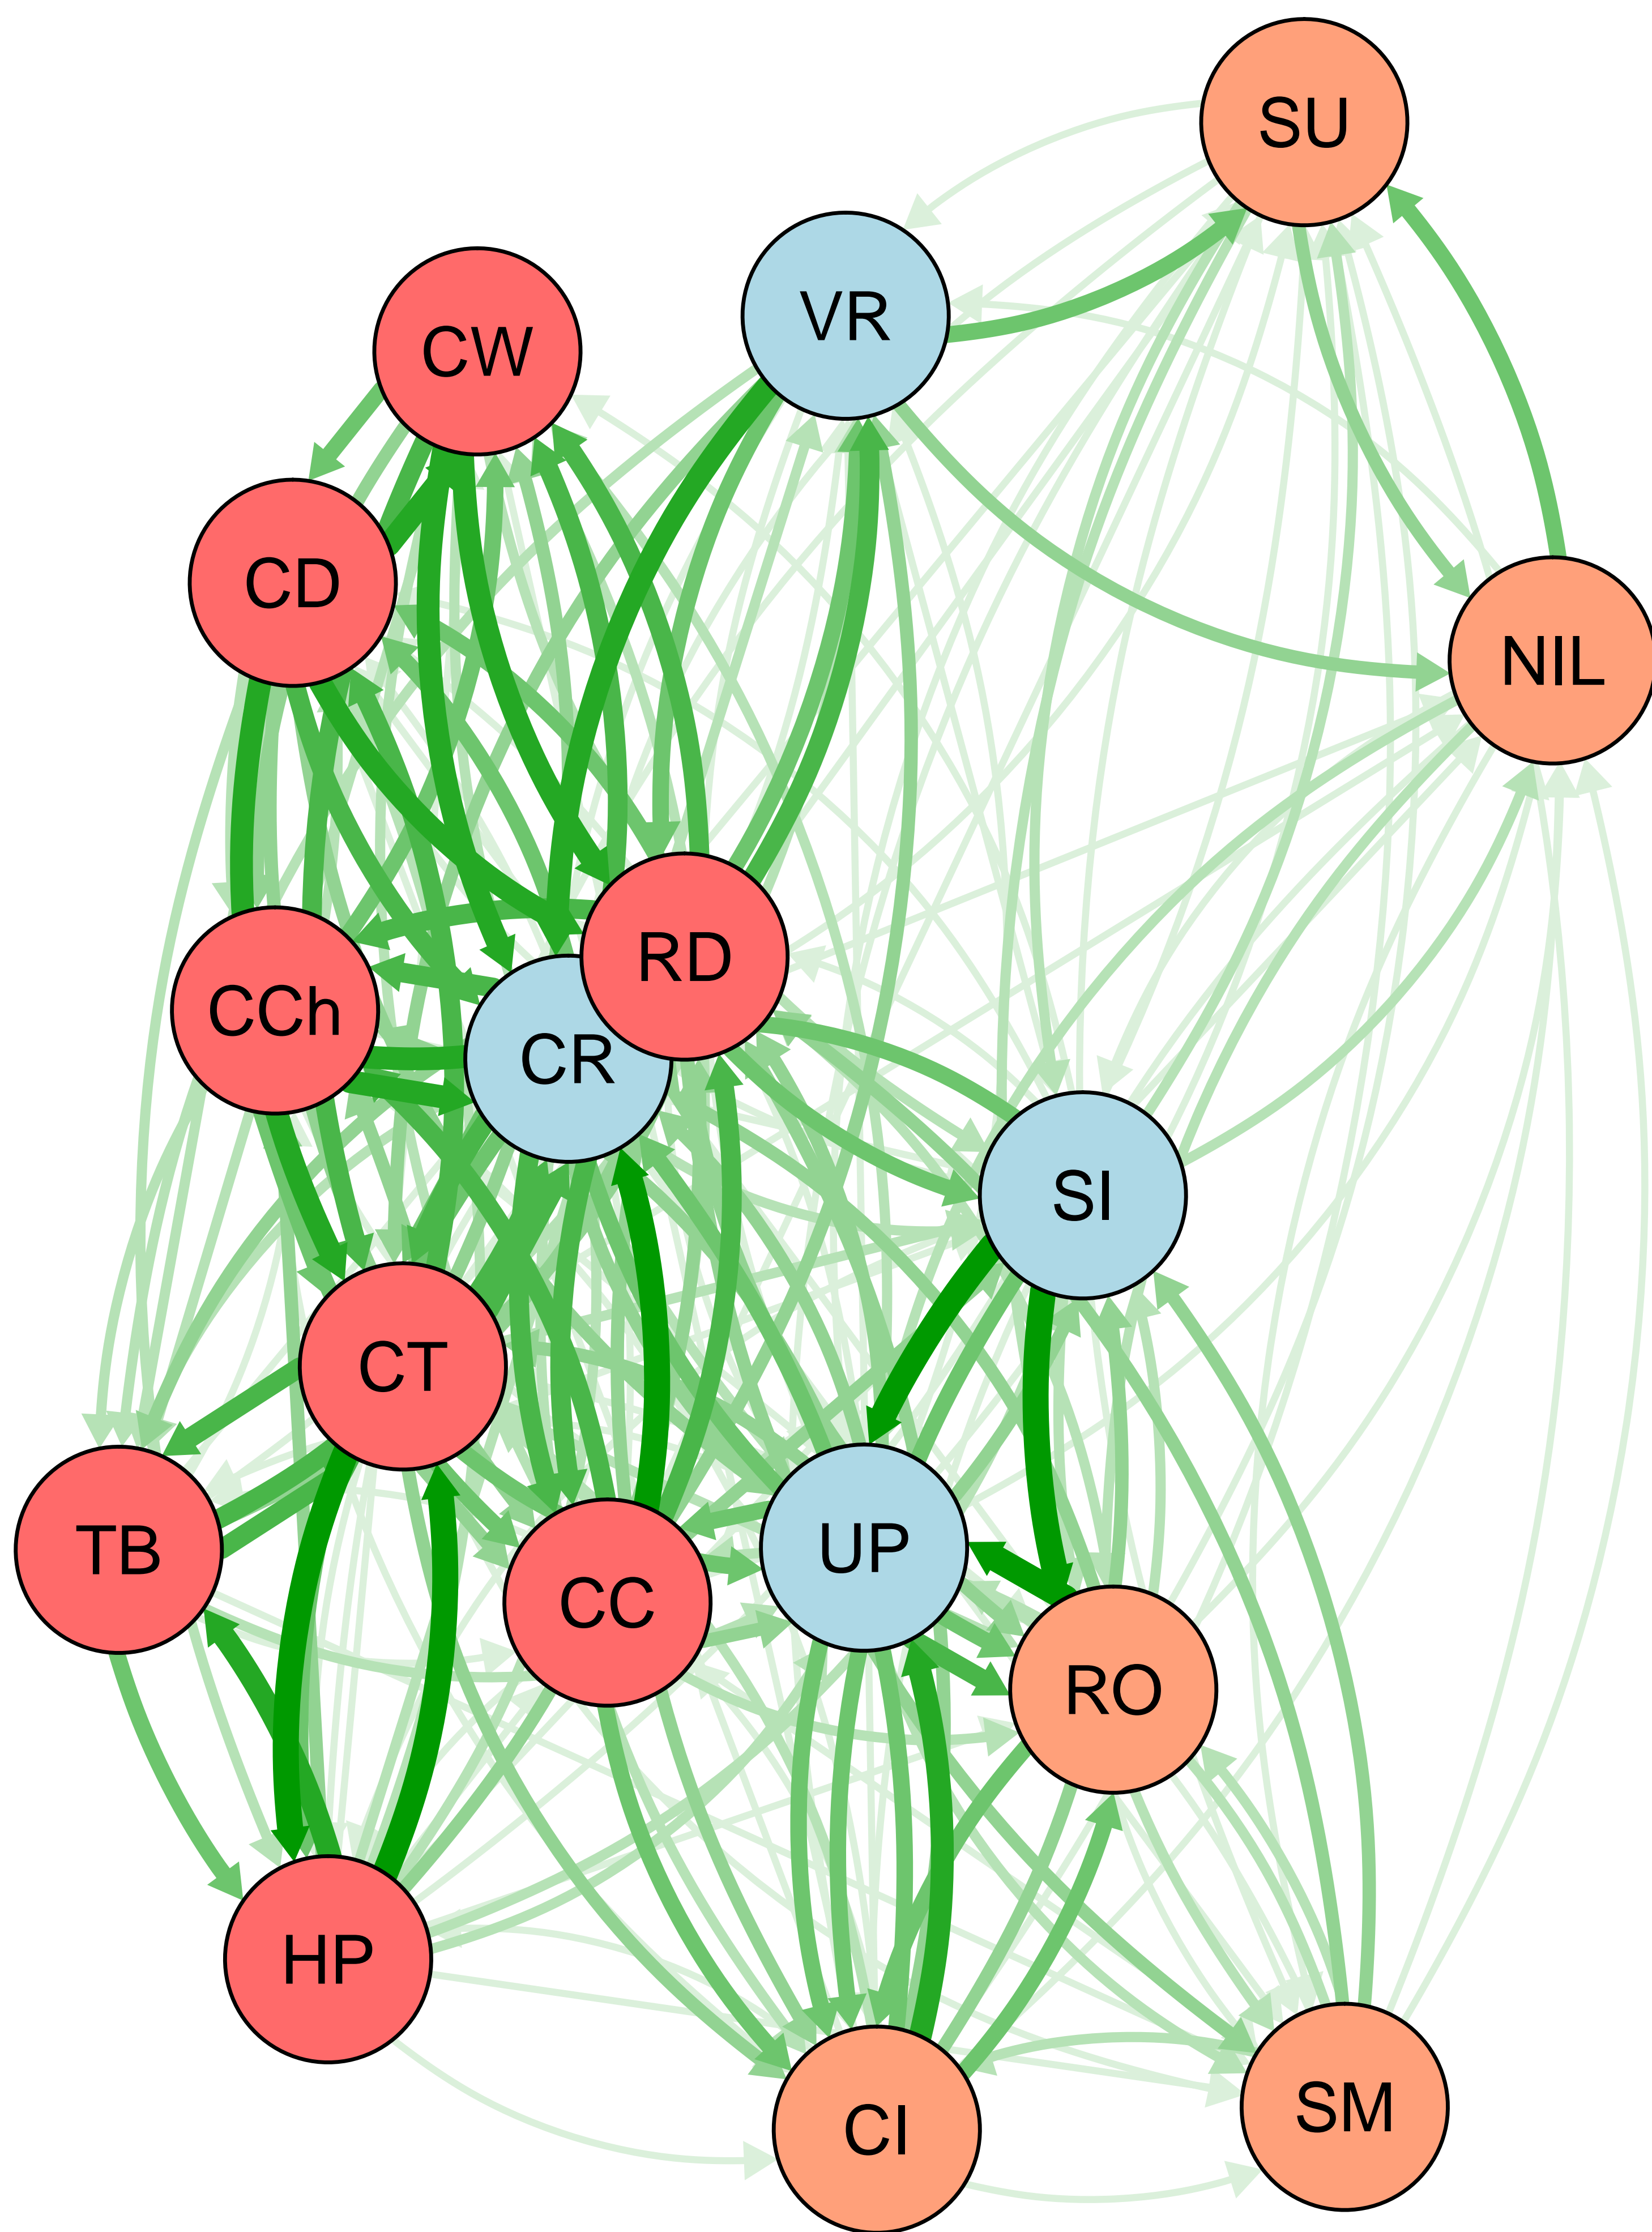

- Autism
- Bridge
- OCD

Supplement: Supplementary file 36 [file 2]

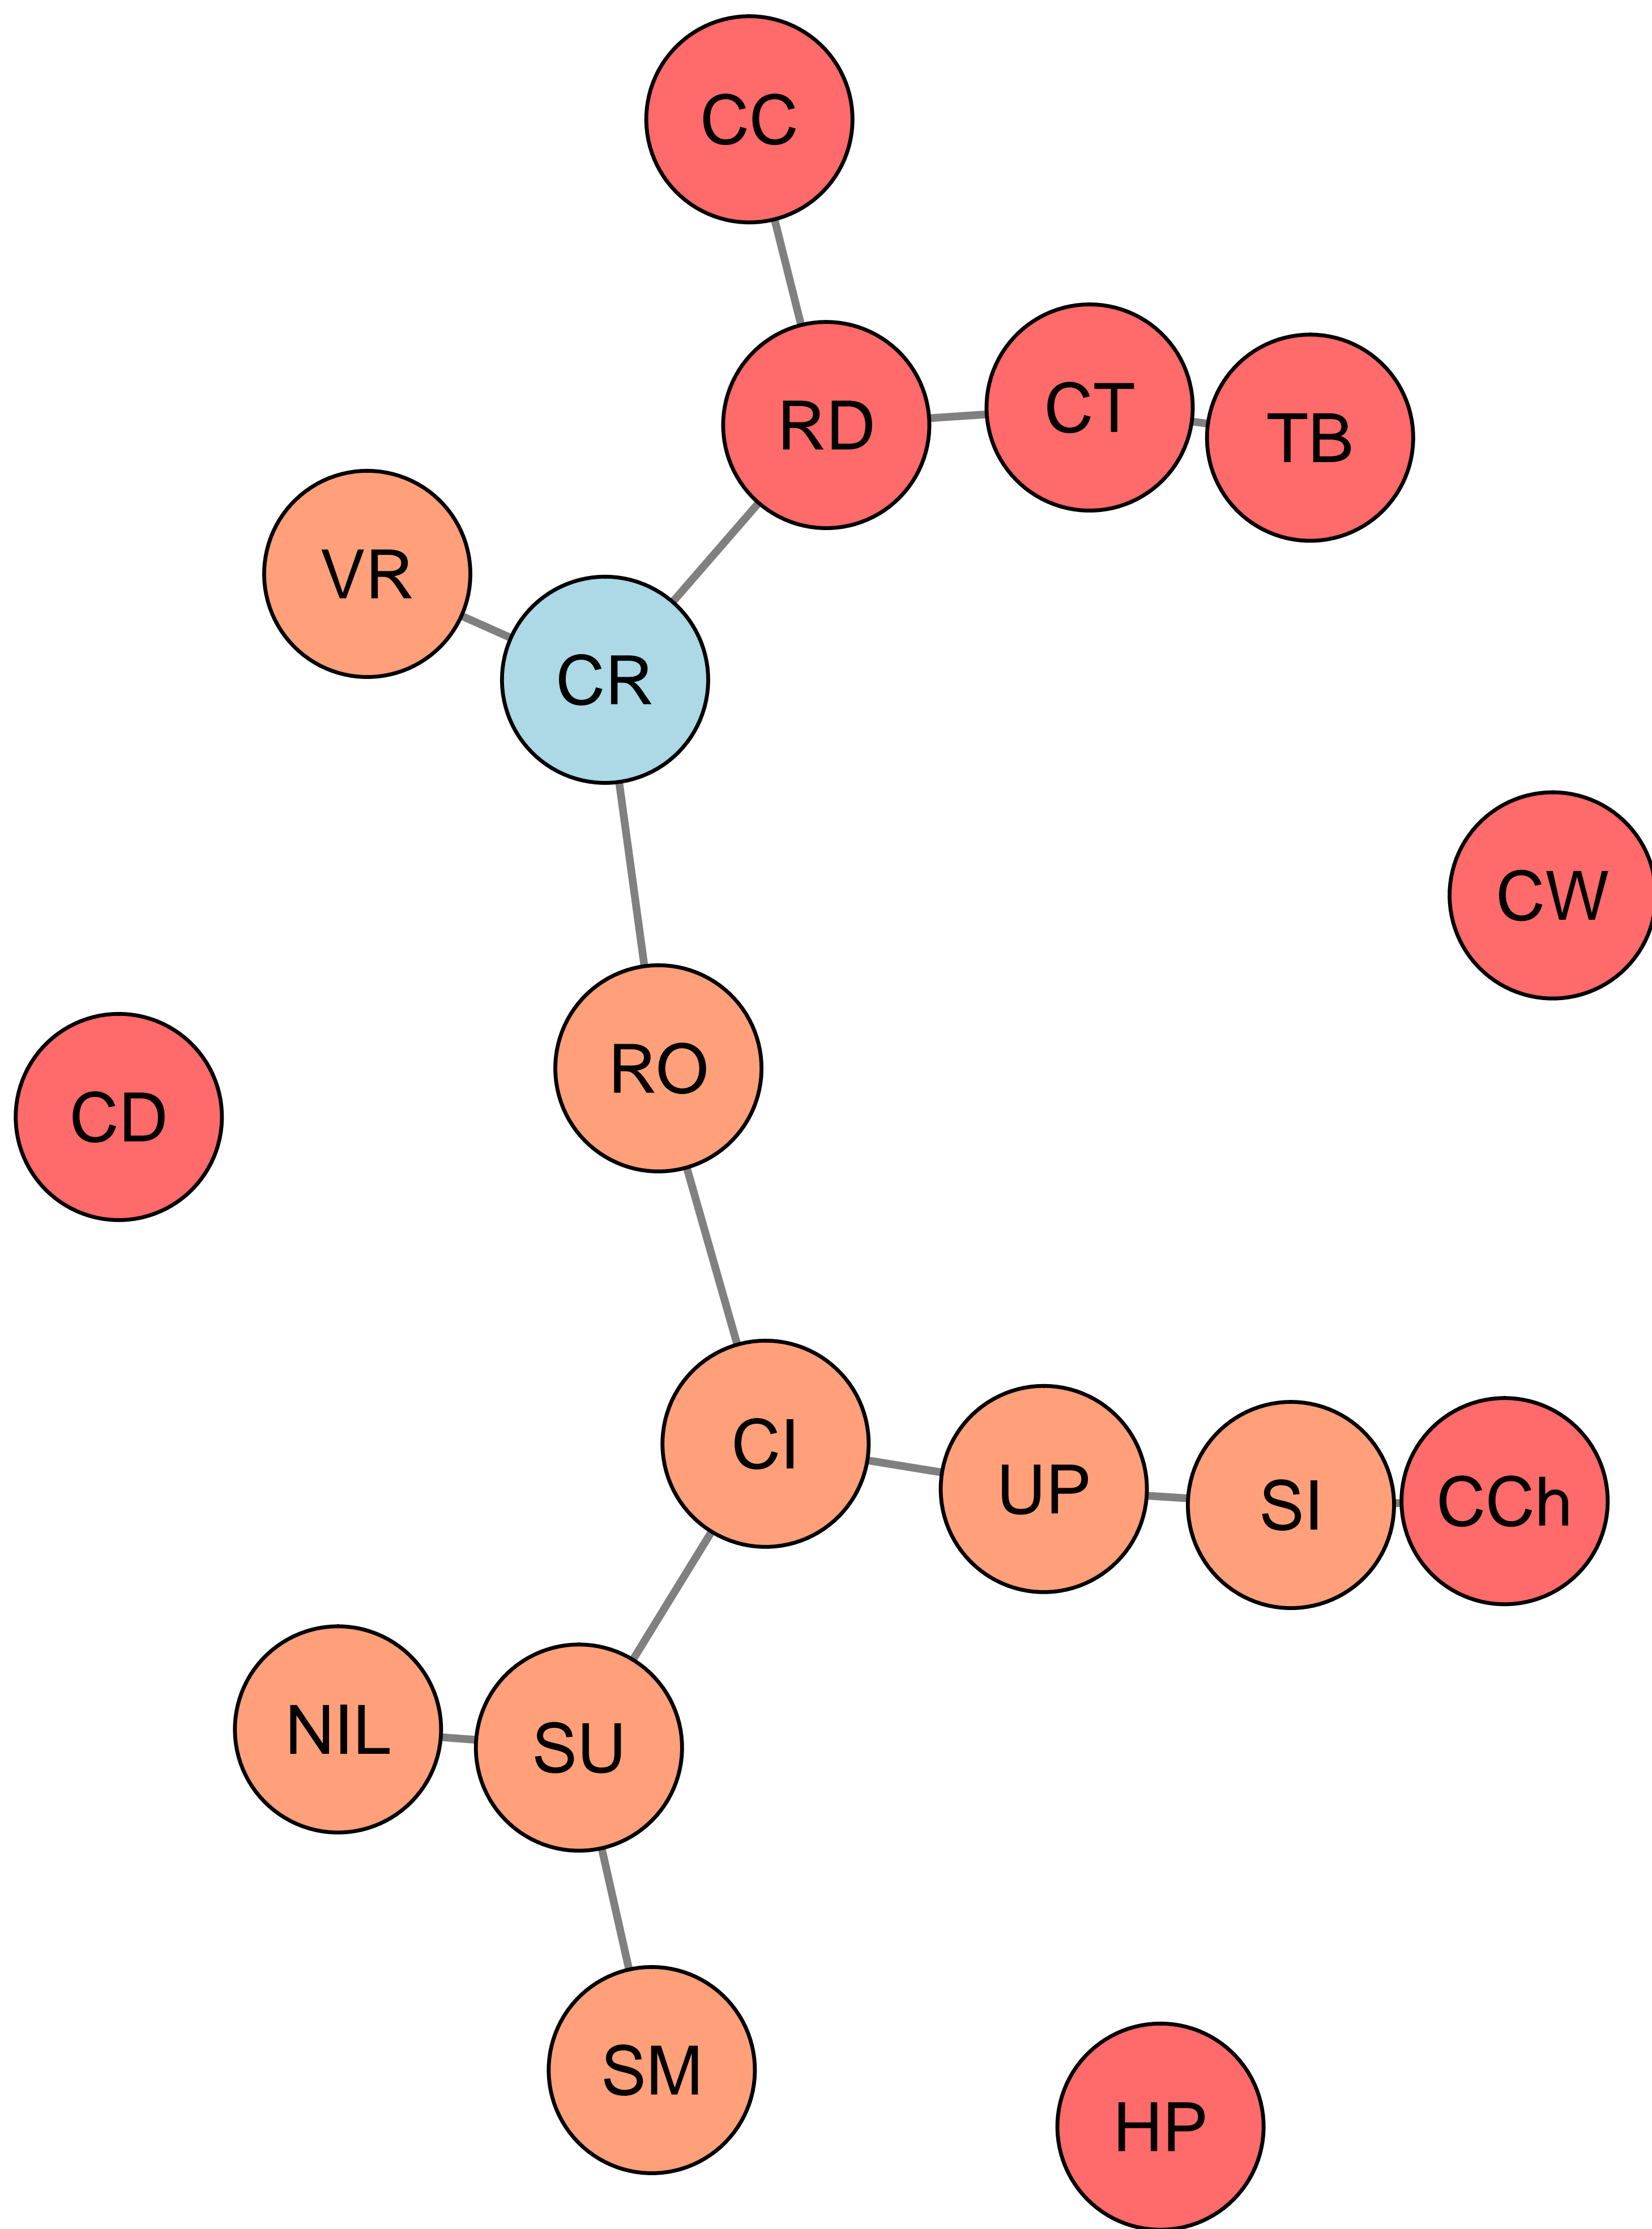

● Autism  
● Bridge  
● OCD

Supplement: Supplementary file 38 [file 2]
